# Supplementary material
Source: PubMed Central journal article supplement (PMC2955196)
Supplement: NIHMS229268-supplement.pdf [file NIHMS229268-supplement.pdf]

## **SUPPLEMENTAL MATERIAL**

### **Differential cardiac remodeling in preload versus afterload**

|                                                              | <b>Page:</b>   |
|--------------------------------------------------------------|----------------|
| <b>Expanded material and methods</b>                         | <b>2-13</b>    |
| <b>Supplementary Figure:</b>                                 | <b>14-20</b>   |
| <b>Figure Legend:</b>                                        | <b>21-22</b>   |
| <b>References</b>                                            | <b>23-25</b>   |
| <br>                                                         |                |
| <b><u>Gene-Array analysis:</u></b>                           |                |
| <b>Table I</b>                                               |                |
| <b>Genes upregulated in TAC</b>                              | <b>26-66</b>   |
| <b>Genes downregulated in TAC</b>                            | <b>67-107</b>  |
| <br>                                                         |                |
| <b>Table II</b>                                              |                |
| <b>Genes upregulated in Shunt</b>                            | <b>108-116</b> |
| <b>Genes downregulated in Shunt</b>                          | <b>117-135</b> |
| <br>                                                         |                |
| <b>Table III</b>                                             |                |
| <b>Genes significantly regulated between both models and</b> |                |
| <b>Regulated compared to both sham</b>                       | <b>136</b>     |
| <b>Regulated only in TAC</b>                                 | <b>137-140</b> |
| <b>Regulated only in Shunt</b>                               | <b>141</b>     |
| <br>                                                         |                |
| <b>Table IV</b>                                              |                |
| <b>Signal pathways activated in TAC</b>                      | <b>142</b>     |
| <b>Signal pathways repressed in TAC</b>                      | <b>143</b>     |
| <br>                                                         |                |
| <b>Table V</b>                                               |                |
| <b>Signal pathways activated in Shunt</b>                    | <b>145</b>     |
| <b>Signal pathways repressed in Shunt</b>                    | <b>145</b>     |

## **EXPANDED MATERIAL AND METHODS**

### **Animals**

The investigation conforms to the *Guide for the Care and Use of Laboratory Animals* (NIH publication No. 85–23, revised 1996). For the present study following only female animals were used.

### **Aortocaval shunt operation (Shunt)**

Surgery was done as described previously.<sup>1</sup> Briefly, 12 week old female FVBN mice were anesthetized using isofluran insufflation. A longitudinal abdominal incision was made and the vessels prepared. The aorta was clamped and punctured with a needle (23G) through the vena cava inferior. After removing the needle the external hole in the aorta was closed by a cyanoacrylate glue (Pattex, Düsseldorf, Germany). In successful shunt operations mixing of oxygenated blood from the abdominal aorta in the vena cava could be observed. The abdomen was then closed and the mice were kept on a heating plate until full recovery from anesthesia. Sham animals underwent the same procedure except for the puncture of the vessels. At the end of the experiments mice were intubated, ventilated with 100% O<sub>2</sub> and Isofluran. Blood was drawn from the right ventricle and O<sub>2</sub> saturation was measured. Only animals with an right ventricular O<sub>2</sub> saturation over 90% were analyzed.

### **Transverse aortic constriction (TAC)**

Surgery was done using a minimally invasive approach as described previously.<sup>2</sup> Briefly, 12 weeks old female FVBN mice were anesthetized using intraperitoneal injections of ketamine and xylazine (100mg/kg + 5mg/kg). A horizontal incision at the jugulum was used to display the transversal aorta. A 27 gauge needle was tied against the aorta using a 5-0 non-absorbable suture. After removal of the 27 gauge needle, skin was closed and the mice were kept on a

heating plate until recovering from anesthesia. Sham animals underwent the same procedure except banding of the transversal aorta. At the end of the experiment mice were euthanized by isofluran insufflation.

### **Echocardiography**

2D guided M-mode echocardiography was performed using a VS-VEVO 660/230 High Resolution Imaging System (Visualsonics, Toronto, Canada). Mice were lightly anesthetized with 2.5% 2-2-2 Tribromoethanol (avertin, 0.01 ml/g i.p.) and were allowed to breathe spontaneously. LV end-diastolic (LVEDD) and end-systolic (LVESD) dimensions were measured from original tracings by using the leading edge convention of the American Society of Echocardiography. LV percent fractional shortening (FS), LV mass (LVM) were calculated as previously described.<sup>3</sup>

### **In-vivo hemodynamic measurements**

Cardiac catheter and pressure-volume measurements.<sup>4</sup> Mice were anesthetized by isoflurane inhalation and intubated. Anesthesia was maintained by continuous isoflurane inhalation (1.5% vol.). The mice were ventilated with a volume-controlled ventilator (Minivent, Harvard Apparatus, Holliston, MA, USA) with a tidal volume of 150  $\mu$ l and a frequency of 150 breaths/minute. The end-expiratory pressure (PEEP) was kept constant at 1 cm H<sub>2</sub>O by immersion of the expiration tube into water. Body temperature was measured with a rectal probe and kept constant at 37°C by a heating pad and an infrared bulb with feedback regulation (TKM-0903, FMI GmbH, Seeheim, Germany). The right carotid artery was accessed via a mid-cervical incision. After distal ligation and proximal clamping the artery was cut open and the catheter was inserted. After releasing the proximal clamp the catheter was secured by a ligation around the artery and advanced into the left ventricle. To assure adequate preload, fluid supplementation was provided by intraperitoneal injection of

physiological saline (30ml/kg). Baseline hemodynamic parameters were measured at least 10 min after saline injection when a stable reading of pressure and volume was obtained. After the hemodynamic measurements the offset of the volume signal (parallel volume, VP) was determined by injection of 10  $\mu$ l hypertonic saline (5%) via a 30G catheter into the left jugular vein. At the end of the experiment the catheter was withdrawn from the carotid artery, the mouse was killed by cervical dislocation and the blood was sampled in a heparinized syringe for determination of the blood conductance by use of the cuvettes provided by the manufacturer.

### **Histological analyses**

Tissues were harvested and processed for cryo sectioning using standard techniques<sup>5</sup>. Activated caspase-3 immune reactivity (antibody #G7481, Promega, Madison, WI) was performed on post-fixed sections (horseradish peroxidase-conjugated secondary antibody, diaminobenzidine reaction) as described previously<sup>6</sup>. Sirius red-Fast green staining was performed and quantitated on sections post-fixed in Bouin's solution as described previously.<sup>7,8</sup> To quantitate atrial collagen content, images were captured with a digital camera and the red pixel content of the myocardium was measured using Adobe Photoshop 5.5 and Scion Images for Windows Beta 4.0.2 software. Minimal cardiomyocyte fiber diameter was calculated as described.<sup>9,10</sup> At least 400 randomly selected cardiomyocytes from each animal were analyzed. TUNEL analysis were performed on adjacent sections using the ApopTag Apoptosis Detection kit according to the manufacturer's procedures (Chemicon International, Billerica, MA). Monoclonal rat anti-mouse antibodies against CD45 were used to detect leucocytes (clone 30-F11; sc-53665; abcam; dilution, 1:75). After incubation overnight at 4°C or 1 hour at RT, respectively, and subsequent washing in PBS, PE-labeled secondary goat anti-rat antibodies (dilution, 1:400; Molecular Probes) were added for 60 minutes. Cell nuclei were visualized using diamidino-4',6'-phenyl-2-indoledichlorhydrate

(DAPI; Sigma; dilution, 1:200), mounted in VectaShield (Vector) and inspected on a Zeiss axiovert fluorescence microscope. The number of CD45-positive leucocytes was evaluated on 6 randomly selected microscope fields (400x magnification) and expressed per mm<sup>2</sup> (for CD45).

### **Measurement of DNA synthesis**

DNA synthesis was monitored using a tritiated thymidine incorporation assay (200  $\mu$ Ci I.P. at 28 Ci/mM, Amersham, Arlington Heights, IL) in combination with the MHC-nLAC reporter transgenic strain.<sup>9,11</sup> Mice were injected with thymidine 1 weeks following surgery (TAC, Shunt or the respective sham surgeries). Standard methods were employed for cryosectioning<sup>8</sup> Beta-galactosidase activity was detected by staining with 5-bromo-4-chloro-3-indolyl-beta-D-galactoside (X-GAL), and autoradiography was performed as described.<sup>11</sup> The presence of silvergrains over blue nuclei (i.e., X-GAL stained nuclei) was indicative of cardiomyocyte DNA synthesis, while the presence of silvergrains over Hoechst-stained nuclei was indicative of non-myocyte DNA synthesis.

### **Isolation of cardiomyocytes and measurement of cell length**

Cardiac myocyte isolation was performed as described previously.<sup>12</sup> In brief, mice were anesthetized with isoflurane, hearts were excised and mounted on a Langendorff perfusion-system and retrogradely perfused with a nominally Ca-free Tyrodes' solution containing (in mM) NaCl 113, KCl 4.7, KH<sub>2</sub>PO<sub>4</sub> 0.6, Na<sub>2</sub>HPO<sub>4</sub>x2H<sub>2</sub>O 0.6, MgSO<sub>4</sub>x7H<sub>2</sub>O 1.2, NaHCO<sub>3</sub> 12, KHCO<sub>3</sub> 10, HEPES 10, Taurine 30, BDM 10, glucose 5.5, phenol-red 0.032 for 4 min at 37°C and pH 7.4. Thereafter, perfusion solution was switched to the same solution containing 7.5 mg/ml liberase 1 (Roche diagnostics, Mannheim, Germany), trypsin 0.6% and 0.125 mM CaCl<sub>2</sub>, and perfusion was continued for about 3 min until the heart became flaccid. Ventricular tissue was removed, cut into small pieces and dispersed until no solid cardiac

tissue was left. Ca reintroduction was performed carefully via stepwise increasing Ca-concentration from 0.1 mM to 0.8 mM finally making cardiac myocytes ready for further measurements. Cell length were estimated on an inverted microscope (Nikon Eclipse TE2000-U) by measuring myocyte length in pixel followed by a conversion in metric units as assessed in an earlier performed pixel/ $\mu\text{m}$  calibration.

### **Shortening and $\text{Ca}^{2+}$ Measurements**

Shortening and  $\text{Ca}^{2+}$  measurements were performed as described previously.<sup>12,13</sup> In brief, myocytes were loaded with fluo-3 by incubation with 10  $\mu\text{mol/L}$  of the acetoxymethyl ester (AM) form of the dye for 15 min at room temperature in darkness. After loading, the cells were washed and afterwards superfused with normal Tyrode's (NT) solution containing (mmol/L): 140 NaCl, 4 KCl, 5 HEPES, 1  $\text{MgCl}_2$ , 10 glucose, and 1  $\text{CaCl}_2$  (37°C, pH 7.4). The dye was excited at a wavelength of  $480\pm 15$  nm using a 75 W xenon arc lamp (Ushio, Japan) on the stage of the Nikon Eclipse TE200-U inverted microscope. Emitted fluorescence was measured using a photomultiplier (at  $535\pm 20$  nm). Myocytes were field-stimulated (voltage 25% above threshold) at 1 Hz and 37°C until steady-state was achieved. Cells were transilluminated by red light ( $>650$  nm) and shortening was measured using a sarcomere length detection system (IonOptix Corp, Milton, USA). SR  $\text{Ca}^{2+}$  content was estimated by rapid application of 10 mmol/L caffeine to cause complete SR  $\text{Ca}^{2+}$  release. Fractional SR  $\text{Ca}^{2+}$  release was quantitatively assessed by dividing the  $\text{Ca}^{2+}$  transient amplitude ( $F/F_0$ ) recorded at 1 Hz just before application of caffeine by the caffeine-induced  $\text{Ca}^{2+}$  transient amplitude itself. In a subset of experiments for CaMKII inhibition were added to superfusion ( $\mu\text{mol/L}$ ): 1 KN-93 (Seikagaku Corporation) and 1 KN-92 (Sigma) as an inactive control.

### **Confocal $\text{Ca}^{2+}$ Measurements**

Intact myocytes were loaded with 10  $\mu\text{mol/L}$  fluo-4 AM for 15 min at room temperature. The cells were perfused with normal Tyrode's solution containing 3 mmol/L  $\text{CaCl}_2$  to de-esterify fluo-4 AM before starting the recordings.  $\text{Ca}^{2+}$  sparks were assessed by a laser scanning confocal microscope (LSM 5 Pascal, Zeiss, Germany) as previously reported.<sup>12</sup> Fluo-4 was excited by an argon ion laser (488 nm) and emitted fluorescence was collected through a 515 nm long-pass emission filter. Fluorescence images were recorded in line-scan mode with 512 pixels per line, pixel time 0.64  $\mu\text{s}$ , pixel size 0.07  $\mu\text{m} \times 0.07 \mu\text{m}$ , width of the scan 38.4  $\mu\text{m}$ . Diastolic  $\text{Ca}^{2+}$  spark frequency (CaSpF) was measured following 0.5 Hz stimulation and normalized to cell volume and scan rate ( $\text{pL}^{-1} \cdot \text{s}^{-1}$ ). Peak of  $\text{Ca}^{2+}$  sparks were normalized as  $F/F_0$ .

### **Patch-Clamp measurements**

Current-clamp measurements were performed at stepwise increased stimulation rates (0.5, 1, 2 and 4 Hz) to elicit action potentials (AP) on an inverted Nikon T 300 microscope using a HEKA EPC 10 patch-clamp-setup (Heka Electronics Inc, Lambrecht, Germany). Briefly, low-resistance pipettes (usually  $\sim 3 \text{ M}\Omega$ ) were pulled and filled with an internal solution containing (in mM) K-aspartic acid 120, KCl 8, NaCl 7,  $\text{MgCl}_2$  1, Mg-ATP 5 and HEPES 10. Cells were superfused with an external solution containing (in mM) KCl 5.4, NaCl 135,  $\text{MgCl}_2$  1, HEPES 10 and Glucose 10 at physiological temperature ( $36 \pm 1^\circ\text{C}$ ) and Ca-concentration (1 mM). Cells were current-clamped to  $-75.8 \pm 0.8 \text{ mV}$  (TG) or  $-74.4 \pm 0.8 \text{ mV}$  in WT, respectively. When appropriate, CaMKII was blocked by adding 0.1  $\mu\text{M}$  autopeptide 2-related inhibitory peptide (AiP, Sigma) to the pipette solution. In order to investigate the impact of L-type  $\text{Ca}^{2+}$  current on the action potential characteristics in TAC-cells in a subset of experiments the L-type Ca channel was blocked by Nifedipine (0.5  $\mu\text{M}$ ). In all experiments, myocytes were mounted on the stage of a microscope (Eclipse TE2000-U, Nikon).

Patch-clamp experiments were performed using the EPC-10 amplifier and Patchmaster software (HEKA, Germany). Myocytes were measured in a recordings chamber mounted on the stage of a microscope (Nikon).  $I_{Ca}$  were recorded using the ruptured-patch whole-cell-patch clamp technique. After rupture, 5 min was allowed for equilibration of intracellular solution and cytosol before starting measurements. Fast and slow capacitance as well as series resistance were compensated for using the built in functions of Patchmaster.

For  $I_{Ca}$  recordings, the bath solution contained (mmol/L): 140 NaCl, 4 CsCl, 1 MgCl<sub>2</sub>, 5 HEPES, 10 glucose and 1 CaCl<sub>2</sub> (23°C, pH 7.4, NaOH). Pipettes for  $I_{Ca}$  experiments were pulled to resistances of 2-2.5 MΩ when filled with intracellular solution containing (mmol/L): 105 CsCl, 20 HEPES, 5 BAPTA\*4Cs, 2 di-bromo-BAPTA, 5 Mg-ATP, 1.49 CaCl<sub>2</sub> (23°C, pH 7.2, CsOH) and autopeptide 2-related inhibitory peptide (AiP, 0.1μM) for inhibition of CaMKII when appropriate. From a holding potential of -90mV, cells were briefly depolarized to -40 mV for 50 ms to inactivate Na<sup>+</sup>-currents, then clamped to test potentials steps between -30 mV and +50 mV for a duration of 200 ms in 10 mV step increases with an interval of 1 s. Measured currents were normalized to membrane capacitance.

### **Human samples**

Left ventricular samples (septal resections) were obtained from adult patients with severe, symptomatic aortic stenosis (n = 6, age 72 ± 5 years, left ventricular ejection fraction 60 ± 2%) undergoing aortic valve replacement. Premedication mostly consisted of angiotensin-converting enzyme inhibitors (4 patients), β-blockers (3 patients), calcium channel antagonists (2 patients) and one patient received amiodarone. Only those patients were used where systolic function was preserved (EF>50%) and marked septal hypertrophy was present in order to allow morrow resection and reasonable investigations limited to only hypertrophied myocardium. All procedures involving humans were performed in compliance with the local ethical committee.



**Table with patient datas of aortic stenosis samples**

| Gender | Age | EF (%) | Septum [mm] | PWT [mm] | AOA [cm <sup>2</sup> ] | Medication |     |     |    |           |    |
|--------|-----|--------|-------------|----------|------------------------|------------|-----|-----|----|-----------|----|
|        |     |        |             |          |                        | ACE        | AT1 | Diu | BB | AA        | CA |
| F      | 80  | 50     | 17          | 15       | 0.50                   | +          | -   | -   | +  | -         | -  |
| F      | 76  | 60     | 13          | 13       | 0.49                   | -          | -   | +   | -  | Amiodaron | -  |
| F      | 81  | 60     | 13          | 13       | 0.68                   | +          | -   | -   | +  | -         | -  |
| M      | 60  | 65     | n.a.        | n.a.     | 0.56                   | +          | -   | -   | +  | -         | -  |
| M      | 57  | 65     | 12          | 12       | 0.40                   | +          | -   | -   | +  | -         | +  |
| F      | 81  | 60     | 13          | 13       | 0.50                   | +          | -   | -   | -  | -         | +  |

**Table:** EF: ejecting fraction, PWT: posterior wall thickness; AOA: aortic opening area; ACE: ACE inhibitors; AT1: AT1-inhibitors, DIU: diuretis; BB:  $\beta$ -blocker; AA: antiarhythmics; CA: catecholamines

### **Western immunoblot analysis**

Frozen muscle strips or pieces of the left ventricle were thawed on ice in 50  $\mu$ L of homogenization buffer and homogenized. Protein concentrations of the suspensions were determined and 20  $\mu$ g of samples subjected to SDS-PAGE. Western blotting was carried out according to standard protocols, using antibodies against SERCA (ABR, Rockford, USA), P-AKT (NEB, Ipswich, USA), AKT (NEB), P-GSK (NEB), P-p38 (NEB), p38 (NEB), P-ERK (NEB), ERK (NEB), P-JNK (NEB), JNK (NEB), GSK (BD-Transduction Laboratories, San Jose, USA), CaMKII (a gift from Don M. Bers)<sup>14</sup>, P-CaMKII (ABR), P-HDAC5 (Genescript, Piscataway, USA ), Calsequestrin (ABR), GAPDH (BioTrend, cologne, Germany). For quantification an enhanced chemoluminescence detection system (Amersham) was used according to the manufacturer's instructions.

### **Quantitative mRNA measurement in the mouse myocardium**

DNA-free total RNA was extracted from myocardial samples by a standard protocol with the RNeasy kit and RNase-free DNase Set (Qiagen, Hilden, Germany). First-strand cDNA synthesis was carried out with iScript cDNA synthesis kit (BioRad, München, Germany)

according to manufacturer's instructions. Real-time polymerase chain reactions (PCRs) were performed on a Biorad iQ-Cycler in a volume of 20  $\mu$ L in a 96-well plate. The reaction mixture consisted of 1 $\mu$ l cDNA with 19 $\mu$ l SYBR GRN SUPERMIX (BioRad, München, Germany). After initial denaturation for 60 s at 95 °C, the cycling program consisted of 40 cycles of 95°C for 15s, 60°C for 10s and 72°C for 15s. Emission at 530 nm was measured at the end of each cycle. Primer sequences used were:

|       |            |                          |
|-------|------------|--------------------------|
| GAPDH | sense:     | GCAGTGGCAAAGTGGAGATT,    |
|       | antisense: | TCTCCATGGTGGTGAAGACA;    |
| BNP   | sense:     | TCTCCAGAGCAATTCAAGAT,    |
|       | antisense: | AACAACCTTCAGTGC GTTACA;  |
| MCIP  | sense      | ACTGGAAGGTGGTGTCTTGTGTC, |
|       | antisense: | TCCAGCTTGGGCTTGACTGAG.   |
| SERCA | sense:     | AGATGGTCCTGGCAGATGAC,    |
|       | antisense: | GTCCAGGTCTGGAGGATTGA;    |
| MHC6  | sense:     | CCGGGTGATCTTCCAGCTAA     |
|       | antisense: | GCTCAGCACATC AAAGGCACT   |
| MHC7  | sense:     | TCCCAAGGAGAGACGACTGTG    |
|       | antisense: | CCTTAAGCAGGTCTGGCTGAGT   |
| NCX   | sense:     | GGACCAACAGCTGGAGAGAG     |
|       | antisense: | GAAGCCAGGTCTCCAAGTAA     |
| RYR2  | sense:     | TCTTAGCCATCCTCCACACCA    |
|       | antisense: | CTTCCGATGGCTGCT CTGTTA   |
| PLB   | sense:     | AAGGAAGCTGTTCGGGTTTCAG   |
|       | antisense: | TATAAAAGGGCC ACAGCGTCA   |

cDNAs with known concentrations were used to generate quantification standard curves.

Expression data were normalized to GAPDH.

### **miR-microarray**

Total RNA from mouse myocardial tissue was isolated using TRIzol Reagent from invitrogen according to the manufacturer's protocol. RNA quality was confirmed using the Agilent Bioanalyzer. The samples were subjected to microarray labeling and hybridization on version 11.0 miRCURY LNA™ microRNA Arrays at Exiqon, Denmark, covering all microRNAs annotated in miRBase 11.0 miRBase at The Wellcome Trust Sanger Institute. Each Sample was labeled with Hy3 and assayed against a Hy5 labelled common reference sample containing a set of all samples. After background correction and LOESS normalization, data is expressed as  $\log_2(\text{Hy3}/\text{Hy5})$  and replicates (6 for each experimental group) accordingly as log median ratio differences between the sample groups (delta LMR). For a two-tailed Students T-test calculated between the four sample groups (TAC sham, TAC verum, Shunt sham, Shunt verum). Here the miRs showing a significant regulation between intervention and sham in addition with a significant regulation between both interventions are shown.

### **Gene array hybridization**

The amplification and labeling of the RNA samples were carried out according to the manufacturer's instructions (Affymetrix, Santa Clara, CA). Between one to three  $\mu\text{g}$  from each sample were synthesized into double-stranded cDNA using SuperScript transcriptase (Life Technologies, Inc., Carlsbad, CA) and with an oligo(dT)<sub>24</sub> primer containing a T7 RNA polymerase promoter (TIBMOL Biol, Berlin, Germany). Labeled complementary RNA (cRNA) was prepared from double-stranded cDNA by in vitro transcription using the T7 RNA polymerase. After cleanup (Rneasy, Qiagen, Hilden, Germany), the biotin-labeled cRNA was fragmented by alkaline treatment [40 mmol/L Trisacetate (pH 8.2), 100 mmol/L potassium acetate, and 50 mmol/L magnesium acetate] at 94°C for 35 minutes. Ten  $\mu\text{g}$  of each cRNA sample was hybridized for 16 hours at 45°C to an Affymetrix mouse 430 2.0 GeneChip array. Chips were washed and stained with streptavidin-phycoerythrin using the

GeneChip fluidics station 450 according to protocols recommended by Affymetrix. Finally, probe arrays were scanned using the Affymetrix GeneChip System confocal scanner 3000. Raw data were analyzed with the Affymetrix GeneChip Operating Software (GCOS) version 1.4.

### **Analysis of microarray gene data**

The computational and statistical analysis of the microarray data was carried out using the R version 2.9.1 software<sup>15</sup> and the Bioconductor packages<sup>16</sup>. Pre-processing of the data was performed using the RMA algorithm<sup>17</sup>. Differentially expressed genes were identified by fitting a linear model and applying an empirical Bayesian method using the *limma* package<sup>18</sup>. Gene lists were generated selecting for genes with a FDR-adjusted *P* value threshold of 0.05. Gene set enrichment analysis (GSEA)<sup>19,20</sup> was performed using the *Category* and *GSEABase* packages for the evaluation of differential gene expression at the level of predefined gene sets based on prior biological knowledge. A non-specific filter from the *genefilter* package was applied to remove the control probes, probe sets without EntrezGene identification and genes represented by more than one probe set were collapsed to the probe set with the largest variability. The Kyoto Encyclopaedia of Genes and Genomes (KEGG) pathway database<sup>21</sup> was used to compile the gene sets and those with a size smaller than 10 genes were filtered out. The permutation distribution was computed based on 1000 permutations and a *P* value threshold of 0.025 was selected corresponding to a two-tailed hypothesis test at the 0.05 level.

### **Calculation of mean total wall stress**

Wall stress was calculated according the law of Laplace ( $\sigma = P * r/2w$ )<sup>22</sup> with *P* the systolic or diastolic pressure, *w* the wall thickness and *r* half of the LVEDD or LVESD at 4 time points during the cardiac cycle (mid-systolic, end-systolic, mid-diastolic, end-diastolic). Wall and chamber dimension were measured at end-diastole and end-systole. Wall stress was

further calculated at mid-systole and mid-diastole. Mean wall stress was calculated by the formula:  $WS_{\text{mean}} = WS_{\text{sys}} * t_{\text{sys}} + WS_{\text{dia}} * t_{\text{dia}}$  with  $WS_{\text{sys}} = \text{mean} [WS_{(1)} + WS_{(2)} + WS_{(3)}]$ ,  $WS_{\text{dia}} = \text{mean} [WS_{(4)} + WS_{(1)}]$ ,  $t_{\text{sys}}$  and  $t_{\text{dia}}$  the proportional duration of systole or diastole on the complete cardiac cycle. Time durations were calculated from the pressure/volume curves.

For analysis of gene array based expression raw microarray data were imported into R version 2.9.1<sup>9</sup> and analyzed further with the Bioconductor packages.<sup>10</sup> Pathway analysis was performed taking the gene set enrichment analysis approach<sup>13,14</sup> using the *Category* and *GSEABase* Bioconductor packages querying the Kyoto Encyclopedia of Genes and Genomes pathway database.<sup>15</sup>

# Figure I

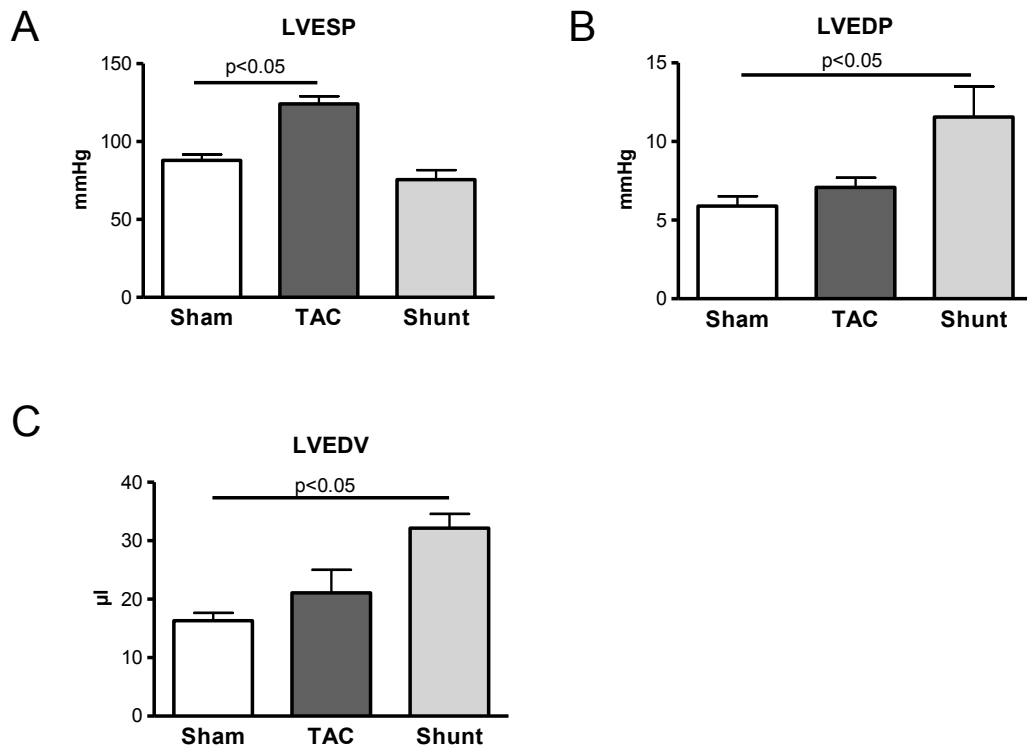

# Figure II

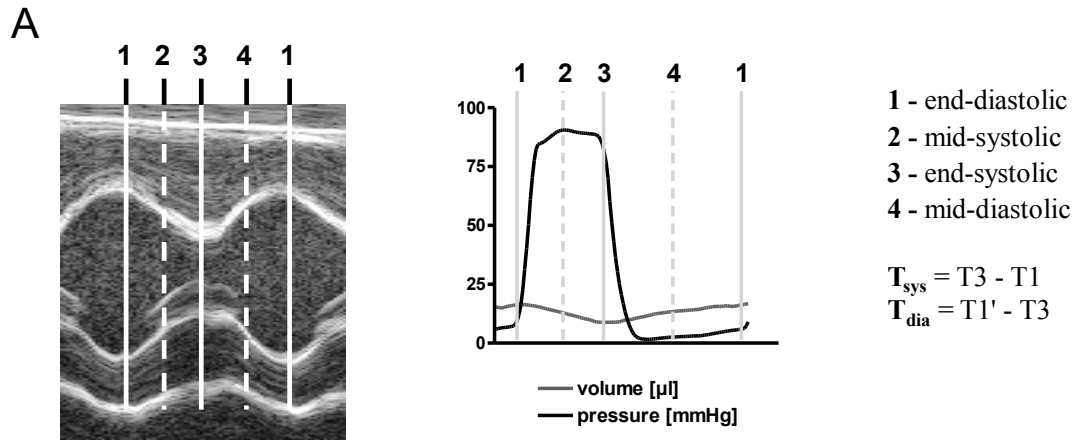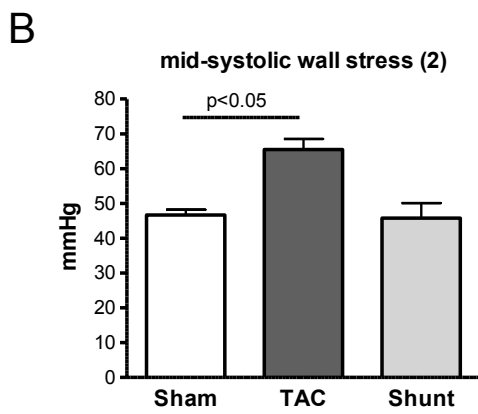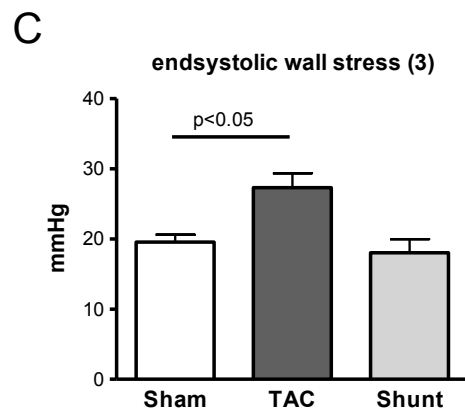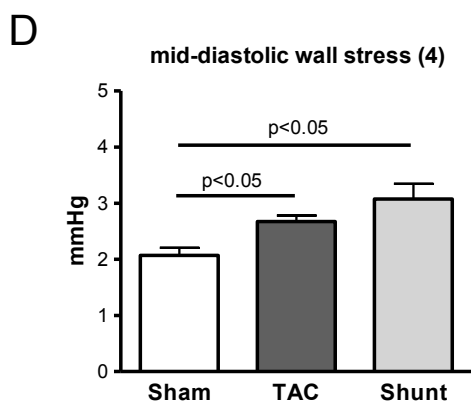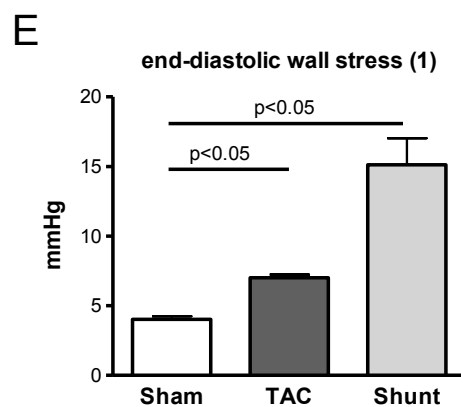

# Figure III

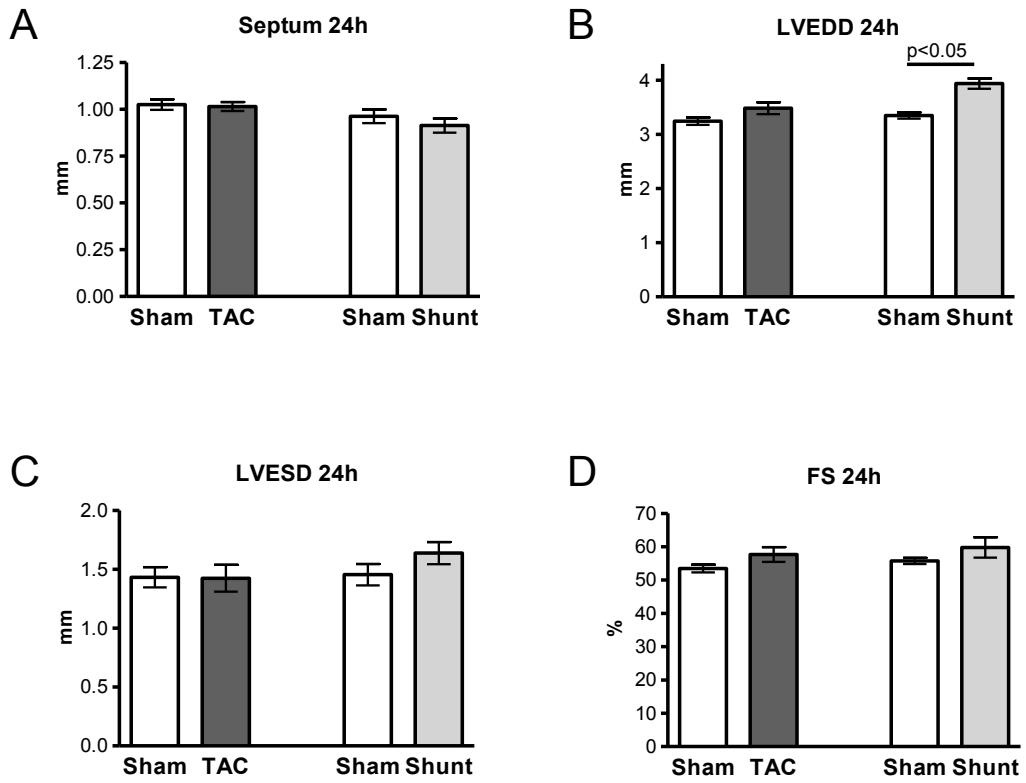



# Figure IV

A

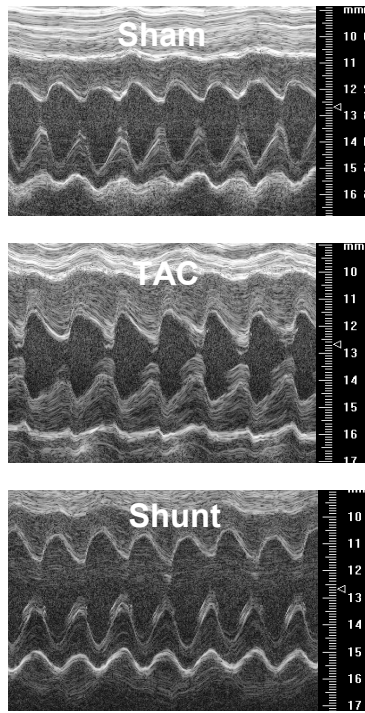

B

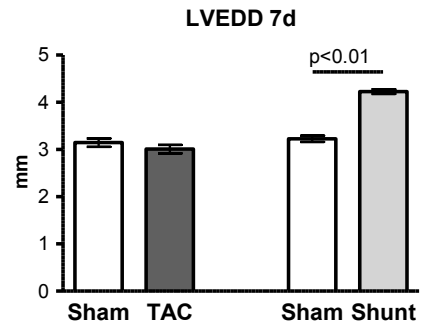

C

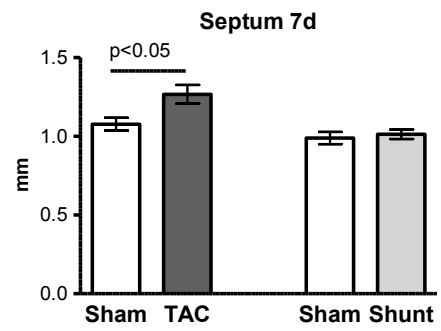

D

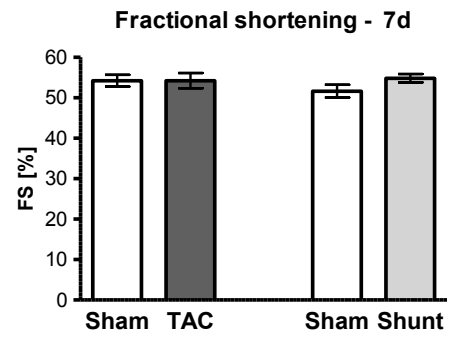

# Figure V

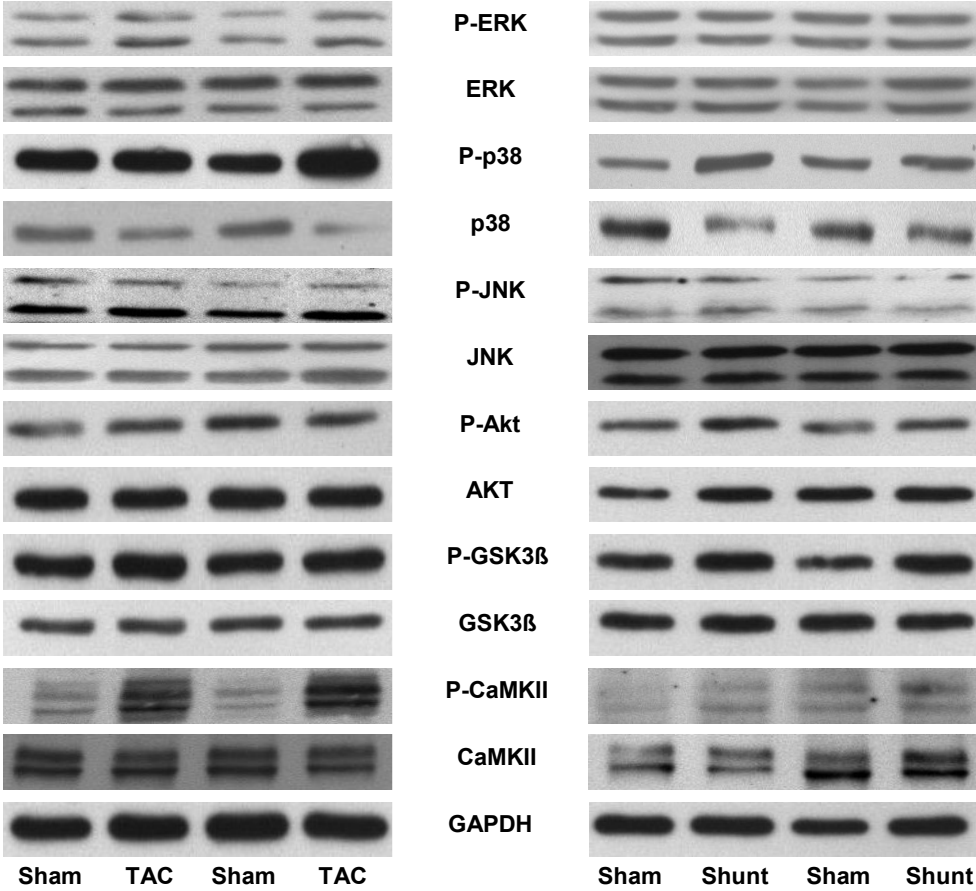

# Figure VI

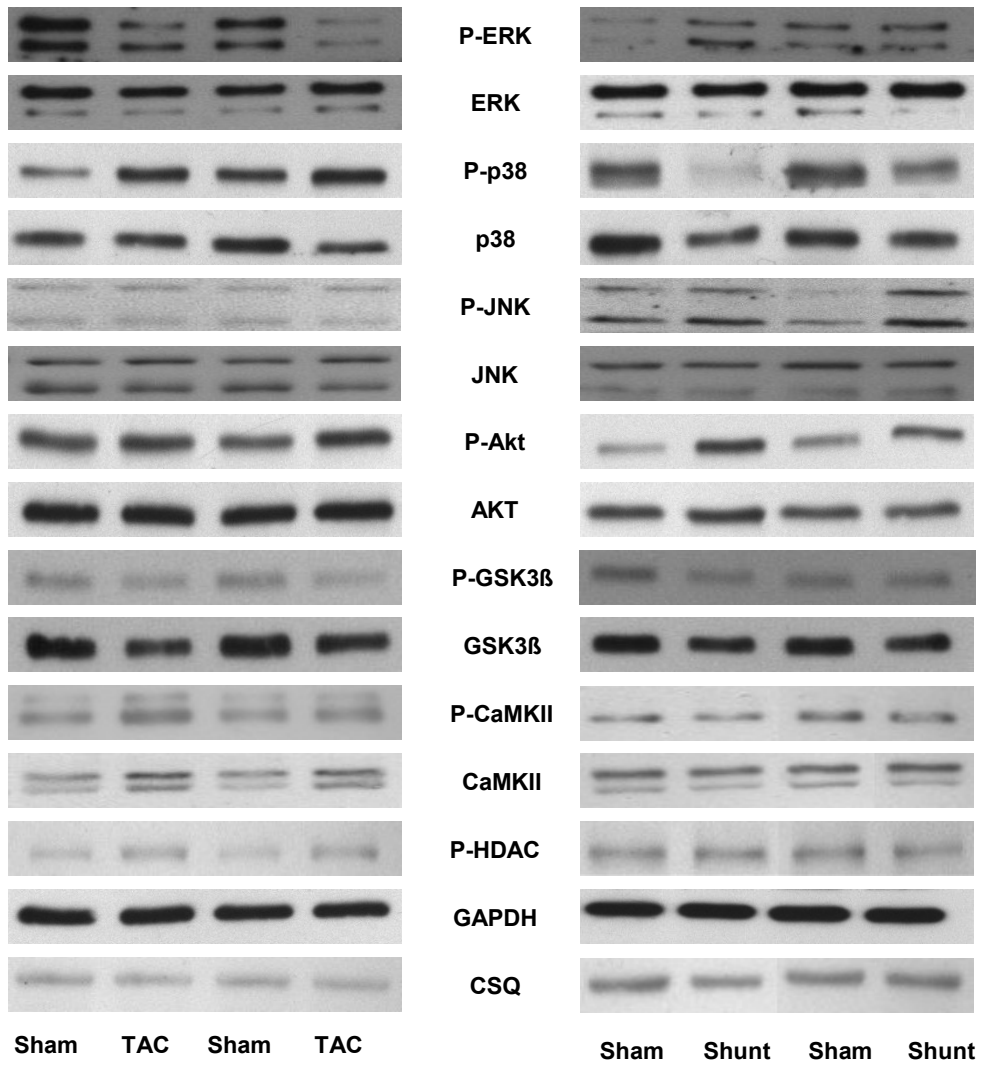

# Figure VII

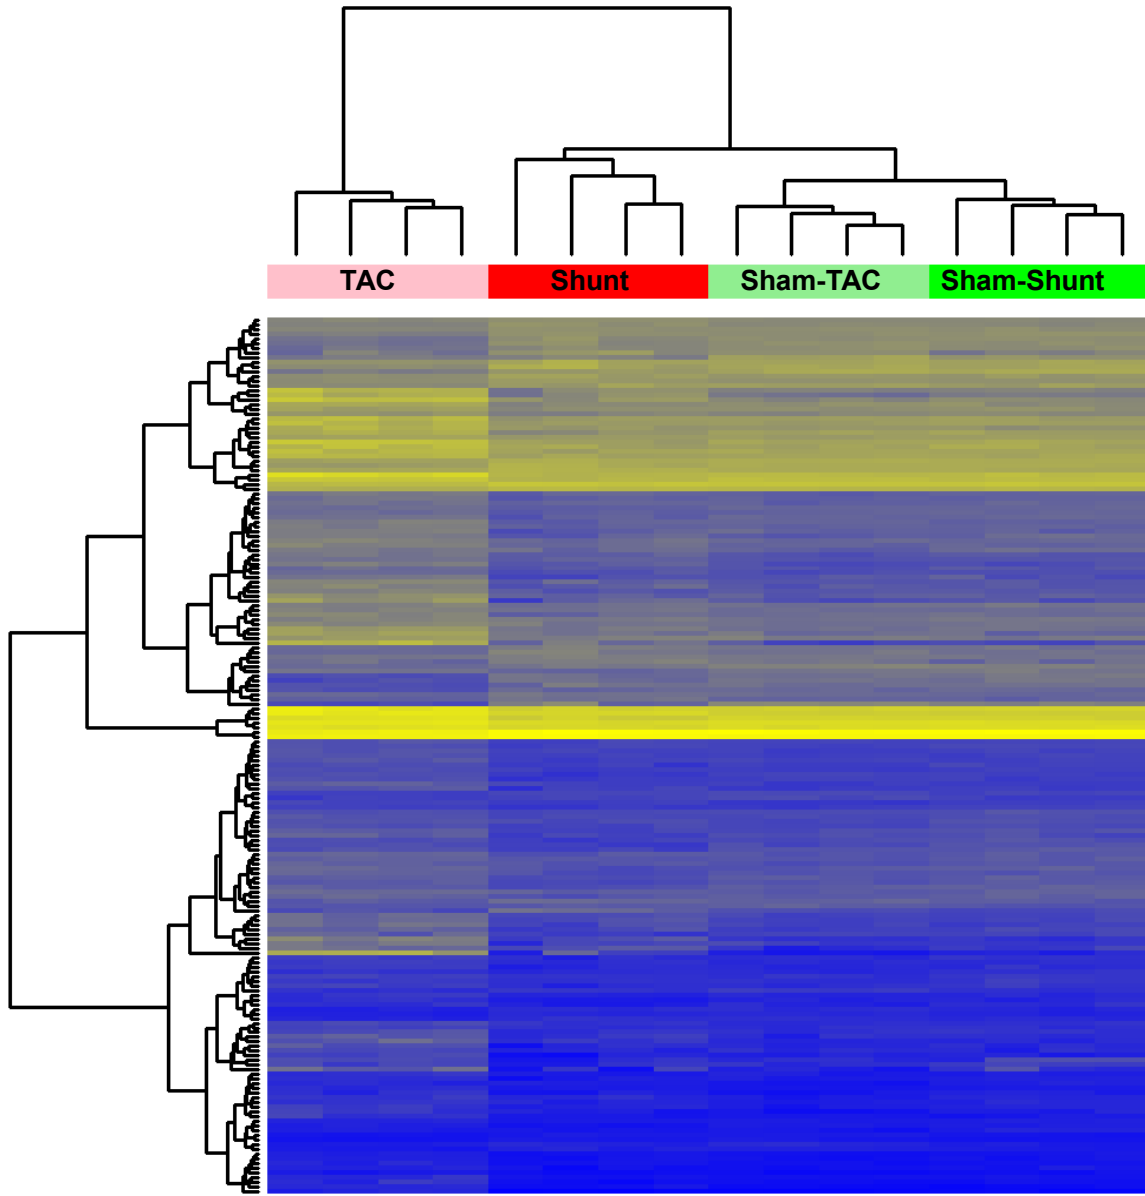

## **Figure Legend:**

### **Suppl. Figure 1:**

Parameters from in-vivo hemodynamic measurements in Sham, TAC and Shunt 6 hours after intervention (n=3 per group); **A**) left ventricular end-systolic pressure (LVESP); **B**) left ventricular end-diastolic pressure (LVEDP); **C**) left ventricular end-diastolic volume (LVEDV).

### **Suppl. Figure 2:**

Wall stress calculation in Sham, TAC and Shunt 6 hours after intervention (n=3 per group); **A**) example of echocardiographic M-Mode, pressure and volume curves; **B**) mid-systolic wall stress; **C**) end-systolic wall stress; **D**) mid-diastolic wall stress; **E**) end-diastolic wall stress

### **Suppl. Figure 3:**

Echocardiographic measurement in Sham, TAC and Shunt 24 hours after intervention (n=6 per group). **A**) Septum; **B**) left ventricular end-diastolic diameter (LVEDD); **C**) left ventricular end-systolic diameter (LVESD); **D**) Fractional shortening (FS)

### **Suppl. Figure 4:**

Echocardiographic measurement in Sham, TAC and Shunt 7 days after intervention (n=8/10/7/7). **A**) Echocardiographic M-Mode registration of Sham, TAC and Shunt; **B**) left ventricular end-diastolic diameter (LVEDD; Shunt: +31%,  $p < 0.01$ ; TAC: no difference); **C**) Septum width (TAC +18%  $p < 0.05$ , Shunt: no difference); **D**) Fractional shortening (FS).

**Suppl. Figure 5:**

Exemplary western blots of phosphorylated and total CaMK, MAPKs, Akt, GSK3 $\beta$  and GAPDH expression 24 hours after intervention.

**Suppl. Figure 6:**

Exemplary western blots of phosphorylated and total CaMK, HDAC, MAPKs, Akt, GSK3 $\beta$ , HDAC and GAPDH as well as calsequestrin expression 7 days after intervention

**Suppl. Figure 7:**

Analysis of gene expression in TAC, Shunt and corresponding Sham by microarrays (n=4 per group). Hierarchical clustering of the differentially regulated 187 probe sets and the individual animals in the appropriate groups (Heat map)

## References:

1. Scheuermann-Freestone M, Freestone NS, Langenickel T, Höhnel K, Dietz R, Willenbrock R. A new model of congestive heart failure in the mouse due to chronic volume overload. *Eur J Heart Fail.* 2001;3:535-43.
2. Hu P, Zhang D, Swenson L, Chakrabarti G, Abel ED, Litwin SE. Minimally invasive aortic banding in mice: effects of altered cardiomyocyte insulin signaling during pressure overload. *Am J Physiol Heart Circ Physiol* 2003;285:H1261-9
3. Schmidt AG, Kadambi VJ, Ball N, Sato Y, Walsh RA, Kranias EG, Hoit BD. Cardiac-specific overexpression of calsequestrin results in left ventricular hypertrophy, depressed force-frequency relation and pulsus alternans in vivo. *J Mol Cell Cardiol.* 2000;32:1735-44.
4. El-Armouche A, Wittköpper K, Degenhardt F, Weinberger F, Didié M, Melnychenko I, Grimm M, Peeck M, Zimmermann WH, Unsöld B, Hasenfuss G, Dobrev D, Eschenhagen T. Phosphatase inhibitor-1-deficient mice are protected from catecholamine-induced arrhythmias and myocardial hypertrophy. *Cardiovasc Res.* 2008;80:396-406.
5. Bullock GR, Petrusz P. *Techniques in immunocytochemistry.* London; New York: Academic Press; 1982
6. Nakajima H, Nakajima HO, Tsai SC, Field LJ. Expression of mutant p193 and p53 permits cardiomyocyte cell cycle reentry after myocardial infarction in transgenic mice. *Circ Res.* 2004;94:1606-1614.
7. Nakajima H, Nakajima HO, Dembowsky K, Pasumarthi KB, Field LJ. Cardiomyocyte cell cycle activation ameliorates fibrosis in the atrium. *Circ Res.* 2006;98:141-148.

8. Pasumarthi KB, Nakajima H, Nakajima HO, Soonpaa MH, Field LJ. Targeted expression of cyclin D2 results in cardiomyocyte DNA synthesis and infarct regression in transgenic mice. *Circ Res.* 2005;96:110-118.
9. Soonpaa MH, Field LJ. Assessment of cardiomyocyte DNA synthesis in normal and injured adult mouse hearts. *Am J Physiol.* 1997;272:H220-226.
10. Dubowitz V, Sewry CA, Fitzsimons RB. *Muscle biopsy: a practical approach.* 2nd ed. London; Philadelphia: Baillière Tindall; 1985
11. Soonpaa MH, Koh GY, Klug MG, Field LJ. Formation of nascent intercalated disks between grafted fetal cardiomyocytes and host myocardium. *Science.* 1994;264:98-101.
12. Maier LS, Zhang T, Chen L, DeSantiago J, Brown JH, Bers DM. Transgenic CaMKII $\delta$ C overexpression uniquely alters cardiac myocyte Ca<sup>2+</sup> handling: reduced SR Ca<sup>2+</sup> load and activated SR Ca<sup>2+</sup> release. *Circ Res.* 2003;92:904-11.
13. Kohlhaas M, Zhang T, Seidler T, Zibrova D, Dybkova N, Steen A, Wagner S, Chen L, Brown JH, Bers DM, Maier LS. Increased sarcoplasmic reticulum calcium leak but unaltered contractility by acute CaMKII overexpression in isolated rabbit cardiac myocytes. *Circ Res.* 2006;98:235-44.
14. Huke S, Bers DM. Temporal dissociation of frequency-dependent acceleration of relaxation and protein phosphorylation by CaMKII. *J Mol Cell Cardiol.* 2007;42:590–599.
15. Ihaka R, Gentleman R. R: A language for data analysis and graphics. *J Comput Graph Stat* 1996;5:299-314.
16. Gentleman RC, Carey VJ, Bates DM, Bolstad B, Dettling M, Dudoit S, *et al.* Bioconductor: open software development for computational biology and bioinformatics. *Genome Biol* 2004;5:R80.



17. Irizarry RA, Hobbs B, Collin F, Beazer-Barclay YD, Antonellis KJ, Scherf U, *et al.* Exploration, normalization, and summaries of high density oligonucleotide array probe level data. *Biostatistics* 2003;4:249-264.
18. Smyth GK. Linear models and empirical bayes methods for assessing differential expression in microarray experiments. *Stat Appl Genet Mol Biol* 2004;3:Article3.
19. Mootha VK, Lindgren CM, Eriksson KF, Subramanian A, Sihag S, Lehar J, *et al.* PGC-1alpha-responsive genes involved in oxidative phosphorylation are coordinately downregulated in human diabetes. *Nat Genet* 2003;34:267-273.
20. Subramanian A, Tamayo P, Mootha VK, Mukherjee S, Ebert BL, Gillette MA, *et al.* Gene set enrichment analysis: a knowledge-based approach for interpreting genome-wide expression profiles. *Proc Natl Acad Sci U S A* 2005;102:15545-15550.
21. Kanehisa M, Goto S. KEGG: kyoto encyclopedia of genes and genomes. *Nucleic Acids Res* 2000;28:27-30.
22. Zierhut W, Studer R, Laurent D, Kästner S, Allegrini P, Whitebread S, Cumin F, Baum HP, de Gasparo M, Drexler H. Left ventricular wall stress and sarcoplasmic reticulum Ca(2+)-ATPase gene expression in renal hypertensive rats: dose-dependent effects of ACE inhibition and AT1-receptor blockade. *Cardiovasc Res.* 1996;31:758-68.

## GENE ARRAY ANALYSIS

**Table I**

### **Upregulated in TAC vs. Sham**

| <b>Affymetrix probe set identification</b> | <b>Gene symbol</b> | <b>Gene name</b>                                                                                   | <b>Fold change</b> | <b>Adjusted P value</b> |
|--------------------------------------------|--------------------|----------------------------------------------------------------------------------------------------|--------------------|-------------------------|
| 1449254_at                                 | Spp1               | secreted phosphoprotein 1                                                                          | 53,75              | 0,0000                  |
| 1460227_at                                 | Timp1              | tissue inhibitor of metalloproteinase 1                                                            | 18,87              | 0,0000                  |
| 1416342_at                                 | Tnc                | tenascin C                                                                                         | 8,91               | 0,0000                  |
| 1453898_at                                 | Itgb1bp3           | integrin beta 1 binding protein 3                                                                  | 7,30               | 0,0031                  |
| 1455980_a_at                               | Gas2l3             | growth arrest-specific 2 like 3<br>cartilage intermediate layer protein, nucleotide                | 7,29               | 0,0002                  |
| 1457296_at                                 | Cilp               | pyrophosphohydrolase                                                                               | 7,11               | 0,0003                  |
| 1416121_at                                 | Lox                | lysyl oxidase                                                                                      | 7,01               | 0,0000                  |
| 1436329_at                                 | Egr3               | early growth response 3                                                                            | 6,91               | 0,0026                  |
| 1419684_at                                 | Ccl8               | chemokine (C-C motif) ligand 8                                                                     | 6,51               | 0,0031                  |
| 1426541_a_at                               | Endod1             | endonuclease domain containing 1                                                                   | 6,42               | 0,0000                  |
| 1423110_at                                 | Col1a2             | collagen, type I, alpha 2                                                                          | 6,32               | 0,0021                  |
| 1424768_at                                 | Cald1              | caldesmon 1                                                                                        | 6,29               | 0,0003                  |
| 1455627_at                                 | Col8a1             | collagen, type VIII, alpha 1                                                                       | 5,99               | 0,0014                  |
| 1423606_at                                 | Postn              | periostin, osteoblast specific factor                                                              | 5,93               | 0,0210                  |
| 1418440_at                                 | Col8a1             | collagen, type VIII, alpha 1                                                                       | 5,89               | 0,0005                  |
| 1454694_a_at                               | Top2a              | topoisomerase (DNA) II alpha                                                                       | 5,84               | 0,0367                  |
| 1447819_x_at                               | Col8a1             | collagen, type VIII, alpha 1                                                                       | 5,81               | 0,0001                  |
| 1450625_at                                 | Col5a2             | collagen, type V, alpha 2                                                                          | 5,80               | 0,0111                  |
| 1418949_at                                 | Gdf15              | growth differentiation factor 15                                                                   | 5,60               | 0,0048                  |
| 1452242_at                                 | Cep55              | centrosomal protein 55                                                                             | 5,59               | 0,0332                  |
| 1417457_at                                 | Cks2               | CDC28 protein kinase regulatory subunit 2                                                          | 5,51               | 0,0343                  |
| 1433543_at                                 | Anln               | anillin, actin binding protein                                                                     | 5,48               | 0,0197                  |
| 1448228_at                                 | Lox                | lysyl oxidase                                                                                      | 5,35               | 0,0013                  |
| 1439740_s_at                               | Uck2               | uridine-cytidine kinase 2                                                                          | 5,30               | 0,0000                  |
| 1455494_at                                 | Col1a1             | collagen, type I, alpha 1                                                                          | 5,20               | 0,0020                  |
| 1417458_s_at                               | Cks2               | CDC28 protein kinase regulatory subunit 2<br>serine (or cysteine) peptidase inhibitor, clade A,    | 5,16               | 0,0358                  |
| 1419100_at                                 | Serpina3n          | member 3N                                                                                          | 4,87               | 0,0185                  |
| 1421694_a_at                               | Vcan               | versican<br>latent transforming growth factor beta binding protein                                 | 4,84               | 0,0001                  |
| 1418061_at                                 | Ltbp2              | 2                                                                                                  | 4,83               | 0,0001                  |
| 1427747_a_at                               | Lcn2               | lipocalin 2                                                                                        | 4,74               | 0,0445                  |
| 1422437_at                                 | Col5a2             | collagen, type V, alpha 2                                                                          | 4,63               | 0,0011                  |
| 1452968_at                                 | Cthrc1             | collagen triple helix repeat containing 1                                                          | 4,61               | 0,0000                  |
| 1421811_at                                 | Thbs1              | thrombospondin 1                                                                                   | 4,58               | 0,0016                  |
| 1439377_x_at                               | Cdc20              | cell division cycle 20 homolog (S. cerevisiae)<br>alpha thalassemia/mental retardation syndrome X- | 4,53               | 0,0416                  |
| 1450051_at                                 | Atrx               | linked homolog (human)                                                                             | 4,38               | 0,0051                  |
| 1448604_at                                 | Uck2               | uridine-cytidine kinase 2                                                                          | 4,37               | 0,0001                  |

|              |           |                                                                        |      |        |
|--------------|-----------|------------------------------------------------------------------------|------|--------|
| 1428295_at   | Synpo2l   | synaptopodin 2-like                                                    | 4,34 | 0,0173 |
| 1422789_at   | Aldh1a2   | aldehyde dehydrogenase family 1, subfamily A2                          | 4,29 | 0,0059 |
| 1437744_at   | Slitrk4   | SLIT and NTRK-like family, member 4                                    | 4,28 | 0,0001 |
| 1450922_a_at | Tgfb2     | transforming growth factor, beta 2                                     | 4,21 | 0,0000 |
| 1418441_at   | Col8a1    | collagen, type VIII, alpha 1                                           | 4,21 | 0,0016 |
| 1426642_at   | Fn1       | fibronectin 1                                                          | 4,09 | 0,0102 |
| 1418728_at   | Star      | steroidogenic acute regulatory protein                                 | 4,07 | 0,0006 |
| 1423250_a_at | Tgfb2     | transforming growth factor, beta 2                                     | 4,01 | 0,0000 |
| 1418476_at   | Crif1     | cytokine receptor-like factor 1                                        | 4,00 | 0,0000 |
| 1449082_at   | Mfap5     | microfibrillar associated protein 5                                    | 3,98 | 0,0038 |
| 1416118_at   | Trim59    | tripartite motif-containing 59                                         | 3,95 | 0,0442 |
| 1452436_at   | Loxl2     | lysyl oxidase-like 2                                                   | 3,94 | 0,0013 |
| 1437224_at   | Rtn4      | reticulon 4                                                            | 3,90 | 0,0002 |
| 1455905_at   | Rik       | RIKEN cDNA 2610507B11 gene                                             | 3,88 | 0,0034 |
| 1439764_s_at | Igf2bp2   | insulin-like growth factor 2 mRNA binding protein 2                    | 3,88 | 0,0002 |
| 1423760_at   | Cd44      | CD44 antigen                                                           | 3,87 | 0,0000 |
| 1450065_at   | Adcy7     | adenylate cyclase 7                                                    | 3,87 | 0,0028 |
| 1423669_at   | Col1a1    | collagen, type I, alpha 1                                              | 3,85 | 0,0079 |
| 1437581_at   | Zfp800    | zinc finger protein 800                                                | 3,85 | 0,0009 |
| 1460208_at   | Fbn1      | fibrillin 1                                                            | 3,81 | 0,0034 |
| 1440282_at   | Tulp4     | tubby like protein 4                                                   | 3,77 | 0,0006 |
| 1452382_at   | Dnm3os    | dynamamin 3, opposite strand                                           | 3,75 | 0,0030 |
| 1437244_at   | Gas2l3    | growth arrest-specific 2 like 3                                        | 3,73 | 0,0005 |
| 1436755_at   | Itih5     | inter-alpha (globulin) inhibitor H5                                    | 3,69 | 0,0006 |
| 1419598_at   | Ms4a6d    | membrane-spanning 4-domains, subfamily A, member 6D                    | 3,67 | 0,0001 |
| 1460302_at   | Thbs1     | thrombospondin 1                                                       | 3,65 | 0,0042 |
| 1445481_at   | AI317158  | expressed sequence AI317158                                            | 3,60 | 0,0140 |
| 1418188_a_at | Ramp2     | receptor (calcitonin) activity modifying protein 2                     | 3,53 | 0,0026 |
| 1421854_at   | Fgl2      | fibrinogen-like protein 2                                              | 3,53 | 0,0035 |
| 1419599_s_at | Ms4a6d    | membrane-spanning 4-domains, subfamily A, member 6D                    | 3,50 | 0,0002 |
| 1428942_at   | Mt2       | metallothionein 2                                                      | 3,50 | 0,0062 |
| 1434411_at   | Col12a1   | collagen, type XII, alpha 1                                            | 3,49 | 0,0003 |
| 1416309_at   | Nusap1    | nucleolar and spindle associated protein 1                             | 3,48 | 0,0381 |
| 1416600_a_at | Rcan1     | regulator of calcineurin 1                                             | 3,47 | 0,0009 |
| 1444058_at   | Dzip3     | DAZ interacting protein 3, zinc finger                                 | 3,45 | 0,0005 |
| 1427682_a_at | Egr2      | early growth response 2                                                | 3,45 | 0,0219 |
| 1427275_at   | Smc4      | structural maintenance of chromosomes 4                                | 3,44 | 0,0012 |
| 1419276_at   | Enpp1     | ectonucleotide pyrophosphatase/phosphodiesterase 1                     | 3,43 | 0,0001 |
| 1441946_at   | Itih5     | inter-alpha (globulin) inhibitor H5                                    | 3,41 | 0,0288 |
| 1426909_at   | Uck2      | uridine-cytidine kinase 2                                              | 3,38 | 0,0000 |
| 1418454_at   | Mfap5     | microfibrillar associated protein 5                                    | 3,34 | 0,0147 |
| 1422748_at   | Zeb2      | zinc finger E-box binding homeobox 2                                   | 3,31 | 0,0003 |
| 1422814_at   | Aspm      | asp (abnormal spindle)-like, microcephaly associated (Drosophila)      | 3,30 | 0,0313 |
| 1420947_at   | Atrx      | alpha thalassemia/mental retardation syndrome X-linked homolog (human) | 3,29 | 0,0084 |
| 1431004_at   | LOC100047 |                                                                        |      |        |
| 1431004_at   | 339       | similar to lysyl oxidase-like 2                                        | 3,28 | 0,0268 |
| 1421855_at   | Fgl2      | fibrinogen-like protein 2                                              | 3,27 | 0,0002 |
| 1450923_at   | Tgfb2     | transforming growth factor, beta 2                                     | 3,24 | 0,0000 |
| 1420973_at   | Arid5b    | AT rich interactive domain 5B (MRF1-like)                              | 3,23 | 0,0055 |
| 1425951_a_at | Clec4n    | C-type lectin domain family 4, member n                                | 3,19 | 0,0010 |

|              |          |                                                                                                |      |        |
|--------------|----------|------------------------------------------------------------------------------------------------|------|--------|
| 1427683_at   | Egr2     | early growth response 2                                                                        | 3,17 | 0,0174 |
| 1425896_a_at | Fbn1     | fibrillin 1                                                                                    | 3,15 | 0,0101 |
| 1449388_at   | Thbs4    | thrombospondin 4                                                                               | 3,13 | 0,0111 |
| 1426808_at   | Lgals3   | lectin, galactose binding, soluble 3                                                           | 3,12 | 0,0006 |
| 1419519_at   | Igf1     | insulin-like growth factor 1                                                                   | 3,10 | 0,0001 |
| 1438271_at   | Lpp      | LIM domain containing preferred translocation partner in lipoma                                | 3,08 | 0,0045 |
| 1416221_at   | Fstl1    | follicle-stimulating-like 1                                                                    | 3,06 | 0,0142 |
| 1417695_a_at | Soat1    | sterol O-acyltransferase 1                                                                     | 3,06 | 0,0032 |
| 1419627_s_at | Clec4n   | C-type lectin domain family 4, member n                                                        | 3,04 | 0,0004 |
| 1451922_at   | Lman1l   | lectin, mannose-binding 1 like                                                                 | 3,00 | 0,0006 |
| 1456062_at   | Nppa     | natriuretic peptide precursor type A                                                           | 2,98 | 0,0135 |
| 1444031_at   | Camk2d   | calcium/calmodulin-dependent protein kinase II, delta                                          | 2,98 | 0,0002 |
| 1459984_at   | Mia3     | melanoma inhibitory activity 3                                                                 | 2,97 | 0,0111 |
| 1448259_at   | Fstl1    | follicle-stimulating-like 1                                                                    | 2,97 | 0,0208 |
| 1448352_at   | Luzp1    | leucine zipper protein 1                                                                       | 2,96 | 0,0009 |
| 1450377_at   | Thbs1    | thrombospondin 1                                                                               | 2,96 | 0,0203 |
| 1416318_at   | Serpina1 | serine (or cysteine) peptidase inhibitor, clade B, member 1a                                   | 2,95 | 0,0023 |
| 1417872_at   | Fhl1     | four and a half LIM domains 1                                                                  | 2,94 | 0,0001 |
| 1423162_s_at | Spred1   | sprouty protein with EVH-1 domain 1, related sequence                                          | 2,93 | 0,0010 |
| 1439436_x_at | Incenp   | inner centromere protein                                                                       | 2,90 | 0,0240 |
| 1449876_at   | Prkg1    | protein kinase, cGMP-dependent, type I                                                         | 2,90 | 0,0101 |
| 1436343_at   | Chd4     | chromodomain helicase DNA binding protein 4                                                    | 2,89 | 0,0003 |
| 1440339_at   | Enpp1    | ectonucleotide pyrophosphatase/phosphodiesterase 1                                             | 2,89 | 0,0043 |
| 1444671_at   | Rasal2   | RAS protein activator like 2                                                                   | 2,88 | 0,0036 |
| 1457666_s_at | Irf202b  | interferon activated gene 202B                                                                 | 2,88 | 0,0099 |
| 1459546_s_at | Enpp1    | ectonucleotide pyrophosphatase/phosphodiesterase 1                                             | 2,86 | 0,0000 |
| 1419149_at   | Serpine1 | serine (or cysteine) peptidase inhibitor, clade E, member 1                                    | 2,86 | 0,0012 |
| 1451827_a_at | Nox4     | NADPH oxidase 4                                                                                | 2,85 | 0,0072 |
| 1416666_at   | Serpine2 | serine (or cysteine) peptidase inhibitor, clade E, member 2                                    | 2,85 | 0,0001 |
| 1442340_x_at | Cyr61    | cysteine rich protein 61                                                                       | 2,84 | 0,0234 |
| 1458439_a_at | Dzip3    | DAZ interacting protein 3, zinc finger                                                         | 2,84 | 0,0042 |
| 1424542_at   | S100a4   | S100 calcium binding protein A4                                                                | 2,83 | 0,0002 |
| 1416529_at   | Emp1     | epithelial membrane protein 1                                                                  | 2,80 | 0,0027 |
| 1440801_s_at | Adrbk2   | adrenergic receptor kinase, beta 2                                                             | 2,80 | 0,0253 |
| 1427311_at   | Bptf     | bromodomain PHD finger transcription factor                                                    | 2,80 | 0,0035 |
| 1453416_at   | Gas2l3   | growth arrest-specific 2 like 3                                                                | 2,80 | 0,0054 |
| 1442082_at   | C3ar1    | complement component 3a receptor 1                                                             | 2,78 | 0,0033 |
| 1437103_at   | Igf2bp2  | insulin-like growth factor 2 mRNA binding protein 2                                            | 2,77 | 0,0001 |
| 1435990_at   | Adamts2  | a disintegrin-like and metalloproteinase (reprolysin type) with thrombospondin type 1 motif, 2 | 2,77 | 0,0005 |
| 1416661_at   | Eif3a    | eukaryotic translation initiation factor 3, subunit A                                          | 2,76 | 0,0099 |
| 1427256_at   | Vcan     | versican                                                                                       | 2,76 | 0,0260 |
| 1447657_s_at | Synpo2l  | synaptopodin 2-like                                                                            | 2,75 | 0,0451 |
| 1431098_at   | Clip1    | CAP-GLY domain containing linker protein 1                                                     | 2,75 | 0,0113 |
| 1435585_at   | Tceal7   | transcription elongation factor A (SII)-like 7                                                 | 2,74 | 0,0014 |
| 1454159_a_at | Igfbp2   | insulin-like growth factor binding protein 2                                                   | 2,74 | 0,0054 |
| 1434376_at   | Cd44     | CD44 antigen                                                                                   | 2,74 | 0,0000 |
| 1449615_s_at | Hdlbp    | high density lipoprotein (HDL) binding protein                                                 | 2,72 | 0,0101 |
| 1426259_at   | Pank3    | pantothenate kinase 3                                                                          | 2,71 | 0,0002 |
| 1427735_a_at | Acta1    | actin, alpha 1, skeletal muscle                                                                | 2,71 | 0,0046 |

|              |                   |                                                                                                         |      |        |
|--------------|-------------------|---------------------------------------------------------------------------------------------------------|------|--------|
| 1456307_s_at | Adcy7             | adenylate cyclase 7                                                                                     | 2,70 | 0,0197 |
| 1438403_s_at | Malat1            | metastasis associated lung adenocarcinoma transcript 1 (non-coding RNA)                                 | 2,70 | 0,0021 |
| 1437675_at   | Slc8a1            | solute carrier family 8 (sodium/calcium exchanger), member 1                                            | 2,70 | 0,0103 |
| 1460218_at   | Cd52              | CD52 antigen                                                                                            | 2,70 | 0,0005 |
| 1426543_x_at | Endod1            | endonuclease domain containing 1                                                                        | 2,68 | 0,0003 |
| 1448424_at   | Frzb              | frizzled-related protein                                                                                | 2,65 | 0,0059 |
| 1415988_at   | Hdlbp             | high density lipoprotein (HDL) binding protein                                                          | 2,64 | 0,0131 |
| 1450355_a_at | Capg              | capping protein (actin filament), gelsolin-like potassium channel tetramerisation domain containing 12b | 2,64 | 0,0008 |
| 1442368_at   | Kctd12b           |                                                                                                         | 2,64 | 0,0325 |
| 1436659_at   | Dclk1             | doublecortin-like kinase 1                                                                              | 2,63 | 0,0105 |
| 1451939_a_at | Srpx              | sushi-repeat-containing protein                                                                         | 2,63 | 0,0000 |
| 1436533_at   | Trove2            | TROVE domain family, member 2                                                                           | 2,62 | 0,0012 |
| 1418350_at   | Hbegf             | heparin-binding EGF-like growth factor                                                                  | 2,61 | 0,0049 |
| 1419621_at   | Ankrd2            | ankyrin repeat domain 2 (stretch responsive muscle)                                                     | 2,61 | 0,0005 |
| 1443923_at   | Akap13            | A kinase (PRKA) anchor protein 13                                                                       | 2,60 | 0,0047 |
| 1448169_at   | Krt18             | keratin 18                                                                                              | 2,58 | 0,0009 |
| 1458179_at   | NA                | NA                                                                                                      | 2,56 | 0,0002 |
| 1434479_at   | Col5a1            | collagen, type V, alpha 1                                                                               | 2,56 | 0,0119 |
| 1422124_a_at | Ptpcr             | protein tyrosine phosphatase, receptor type, C                                                          | 2,55 | 0,0009 |
| 1436838_x_at | Cotl1             | coactosin-like 1 (Dictyostelium) membrane-spanning 4-domains, subfamily A, member 7                     | 2,54 | 0,0083 |
| 1424754_at   | Ms4a7             |                                                                                                         | 2,53 | 0,0449 |
| 1427276_at   | Smc4              | structural maintenance of chromosomes 4                                                                 | 2,53 | 0,0008 |
| 1415877_at   | Dpysl3            | dihydropyrimidinase-like 3                                                                              | 2,53 | 0,0056 |
| 1418189_s_at | Ramp2             | receptor (calcitonin) activity modifying protein 2                                                      | 2,53 | 0,0064 |
| 1418431_at   | Kif5b             | kinesin family member 5B                                                                                | 2,53 | 0,0212 |
| 1450035_a_at | Prpf40a           | PRP40 pre-mRNA processing factor 40 homolog A (yeast)                                                   | 2,52 | 0,0415 |
| 1453593_at   | Vgll3             | vestigial like 3 (Drosophila)                                                                           | 2,52 | 0,0252 |
| 1423407_a_at | Fbln2             | fibulin 2                                                                                               | 2,51 | 0,0028 |
| 1444083_at   | Ttn               | titin                                                                                                   | 2,51 | 0,0002 |
| 1427582_at   | Fgf6              | fibroblast growth factor 6                                                                              | 2,50 | 0,0016 |
| 1425060_s_at | Clip1             | CAP-GLY domain containing linker protein 1                                                              | 2,49 | 0,0220 |
| 1417262_at   | Ptgs2             | prostaglandin-endoperoxide synthase 2                                                                   | 2,48 | 0,0004 |
| 1416805_at   | Rik               | RIKEN cDNA 1110032E23 gene                                                                              | 2,48 | 0,0308 |
| 1459463_at   | NA                | NA                                                                                                      | 2,47 | 0,0054 |
| 1447658_x_at | Synpo2l           | synaptopodin 2-like                                                                                     | 2,46 | 0,0421 |
| 1450397_at   | Mtap1b            | microtubule-associated protein 1B                                                                       | 2,46 | 0,0014 |
| 1444620_at   | NA                | NA                                                                                                      | 2,46 | 0,0029 |
| 1449073_at   | Finc              | filamin C, gamma                                                                                        | 2,46 | 0,0000 |
| 1450241_a_at | Evi2a             | ecotropic viral integration site 2a                                                                     | 2,46 | 0,0104 |
| 1436746_at   | Wnk1              | WNK lysine deficient protein kinase 1                                                                   | 2,46 | 0,0031 |
| 1452360_a_at | Jarid1a           | jumonji, AT rich interactive domain 1A (Rbp2 like)                                                      | 2,45 | 0,0064 |
| 1455271_at   | OTTMUSG0000014994 | predicted gene, OTTMUSG00000014994                                                                      | 2,44 | 0,0001 |
| 1443219_at   | NA                | NA                                                                                                      | 2,44 | 0,0135 |
| 1448553_at   | Myh7              | myosin, heavy polypeptide 7, cardiac muscle, beta                                                       | 2,43 | 0,0440 |
| 1424727_at   | Ccr5              | chemokine (C-C motif) receptor 5                                                                        | 2,43 | 0,0016 |
| 1418666_at   | Ptx3              | pentraxin related gene                                                                                  | 2,42 | 0,0258 |
| 1418237_s_at | Col18a1           | collagen, type XVIII, alpha 1 solute carrier family 22 (organic cation transporter), member 4           | 2,42 | 0,0097 |
| 1417639_at   | Slc22a4           |                                                                                                         | 2,41 | 0,0011 |
| 1457823_at   | Cyr61             | cysteine rich protein 61                                                                                | 2,40 | 0,0330 |

|              |              |                                                                                                          |      |        |
|--------------|--------------|----------------------------------------------------------------------------------------------------------|------|--------|
| 1416200_at   | Il33         | interleukin 33                                                                                           | 2,40 | 0,0095 |
| 1455736_at   | Mybpc2       | myosin binding protein C, fast-type                                                                      | 2,40 | 0,0249 |
| 1443212_at   | NA           | NA                                                                                                       | 2,40 | 0,0070 |
| 1440516_at   | NA           | NA                                                                                                       | 2,40 | 0,0009 |
| 1447812_x_at | FlnC         | filamin C, gamma                                                                                         | 2,40 | 0,0000 |
| 1448383_at   | Mmp14        | matrix metalloproteinase 14 (membrane-inserted)                                                          | 2,39 | 0,0004 |
| 1442832_at   | Ankrd52      | ankyrin repeat domain 52                                                                                 | 2,39 | 0,0260 |
| 1424271_at   | Dclk1        | doublecortin-like kinase 1                                                                               | 2,39 | 0,0147 |
| 1443191_at   | NA           | NA                                                                                                       | 2,39 | 0,0033 |
| 1449154_at   | Col11a1      | collagen, type XI, alpha 1                                                                               | 2,38 | 0,0000 |
| 1455299_at   | Vgll3        | vestigial like 3 (Drosophila)                                                                            | 2,38 | 0,0071 |
| 1429660_s_at | Smc2         | structural maintenance of chromosomes 2                                                                  | 2,38 | 0,0488 |
| 1457275_at   | Synm         | synemin, intermediate filament protein                                                                   | 2,38 | 0,0026 |
| 1418937_at   | Dio2         | deiodinase, iodothyronine, type II                                                                       | 2,38 | 0,0001 |
| 1434129_s_at | Lhfp12       | lipoma HMGIC fusion partner-like 2                                                                       | 2,38 | 0,0257 |
| 1446426_at   | NA           | NA                                                                                                       | 2,38 | 0,0417 |
| 1418018_at   | Cpd          | carboxypeptidase D                                                                                       | 2,37 | 0,0088 |
| 1435477_s_at | Fcgr2b       | Fc receptor, IgG, low affinity IIb                                                                       | 2,37 | 0,0264 |
| 1428936_at   | Atp2b1       | ATPase, Ca <sup>++</sup> transporting, plasma membrane 1                                                 | 2,37 | 0,0006 |
| 1437082_at   | Akap9        | A kinase (PRKA) anchor protein (yotiao) 9                                                                | 2,37 | 0,0483 |
| 1425603_at   | Tmem176a     | transmembrane protein 176A                                                                               | 2,37 | 0,0000 |
| 1417496_at   | Cp           | ceruloplasmin                                                                                            | 2,37 | 0,0354 |
| 1457980_x_at | Uck2         | uridine-cytidine kinase 2                                                                                | 2,37 | 0,0000 |
| 1439012_a_at | Dck          | deoxycytidine kinase                                                                                     | 2,36 | 0,0306 |
| 1426755_at   | Ckap4        | cytoskeleton-associated protein 4                                                                        | 2,36 | 0,0122 |
| 1422864_at   | Runx1        | runt related transcription factor 1                                                                      | 2,36 | 0,0004 |
| 1460426_at   | Pde4dip      | phosphodiesterase 4D interacting protein (myomegalin)                                                    | 2,36 | 0,0346 |
| 1424598_at   | Ddx6         | DEAD (Asp-Glu-Ala-Asp) box polypeptide 6                                                                 | 2,35 | 0,0083 |
| 1416069_at   | Pfkip        | phosphofructokinase, platelet                                                                            | 2,35 | 0,0002 |
| 1448754_at   | Rbp1         | retinol binding protein 1, cellular                                                                      | 2,35 | 0,0070 |
| 1417379_at   | Iqgap1       | IQ motif containing GTPase activating protein 1                                                          | 2,35 | 0,0001 |
| 1452417_x_at | LOC100047628 | similar to Chain L, Structural Basis Of Antigen Mimicry In A Clinically Relevant Melanoma Antigen System | 2,34 | 0,0460 |
| 1419431_at   | Ereg         | epiregulin                                                                                               | 2,34 | 0,0057 |
| 1448591_at   | Ctss         | cathepsin S                                                                                              | 2,34 | 0,0003 |
| 1450652_at   | Ctsk         | cathepsin K                                                                                              | 2,33 | 0,0010 |
| 1419609_at   | Ccr1         | chemokine (C-C motif) receptor 1                                                                         | 2,33 | 0,0001 |
| 1451651_at   | Vsig4        | V-set and immunoglobulin domain containing 4                                                             | 2,32 | 0,0269 |
| 1416658_at   | Frzb         | frizzled-related protein                                                                                 | 2,32 | 0,0001 |
| 1427353_at   | Clasp1       | CLIP associating protein 1                                                                               | 2,32 | 0,0442 |
| 1417130_s_at | Angptl4      | angiopoietin-like 4                                                                                      | 2,31 | 0,0423 |
| 1456777_at   | Mgam         | maltase-glucoamylase                                                                                     | 2,31 | 0,0000 |
| 1440315_at   | Mbnl1        | muscleblind-like 1 (Drosophila)                                                                          | 2,31 | 0,0194 |
| 1448803_at   | Golga4       | golgi autoantigen, golgin subfamily a, 4                                                                 | 2,30 | 0,0070 |
| 1416414_at   | Emilin1      | elastin microfibril interfacier 1                                                                        | 2,30 | 0,0148 |
| 1436983_at   | Crebbp       | CREB binding protein                                                                                     | 2,29 | 0,0194 |
| 1426024_a_at | Dbn1         | drebrin 1                                                                                                | 2,29 | 0,0011 |
| 1437218_at   | Fn1          | fibronectin 1                                                                                            | 2,29 | 0,0002 |
| 1456621_at   | Fam13a       | family with sequence similarity 13, member A                                                             | 2,28 | 0,0039 |
| 1417623_at   | Slc12a2      | solute carrier family 12, member 2                                                                       | 2,28 | 0,0071 |
| 1427919_at   | SrpX2        | sushi-repeat-containing protein, X-linked 2                                                              | 2,28 | 0,0126 |
| 1448406_at   | Eid1         | EP300 interacting inhibitor of differentiation 1                                                         | 2,28 | 0,0021 |
| 1419665_a_at | Nupr1        | nuclear protein 1                                                                                        | 2,27 | 0,0044 |
| 1442977_at   | NA           | NA                                                                                                       | 2,27 | 0,0018 |

|              |            |                                                                                               |      |        |
|--------------|------------|-----------------------------------------------------------------------------------------------|------|--------|
| 1428045_a_at | Elf2       | E74-like factor 2                                                                             | 2,27 | 0,0040 |
| 1425832_a_at | Cxcr6      | chemokine (C-X-C motif) receptor 6                                                            | 2,26 | 0,0006 |
| 1454995_at   | Ddah1      | dimethylarginine dimethylaminohydrolase 1                                                     | 2,26 | 0,0007 |
| 1427263_at   | Xist       | inactive X specific transcripts                                                               | 2,26 | 0,0036 |
| 1457058_at   | Adamts2    | a disintegrin-like and metallopeptidase (reprolysin type) with thrombospondin type 1 motif, 2 | 2,25 | 0,0003 |
| 1446894_at   | NA         | NA                                                                                            | 2,25 | 0,0040 |
| 1457359_at   | Inpp4b     | inositol polyphosphate-4-phosphatase, type II                                                 | 2,25 | 0,0443 |
| 1439956_at   | NA         | NA                                                                                            | 2,24 | 0,0296 |
| 1421551_s_at | Ifi202b    | interferon activated gene 202B                                                                | 2,24 | 0,0054 |
| 1420372_at   | Sntb2      | syntrophin, basic 2                                                                           | 2,24 | 0,0023 |
| 1446127_at   | Zeb1       | zinc finger E-box binding homeobox 1                                                          | 2,24 | 0,0005 |
| 1427699_a_at | Ptpn11     | protein tyrosine phosphatase, non-receptor type 11                                            | 2,24 | 0,0106 |
| 1424927_at   | Glipr1     | GLI pathogenesis-related 1 (glioma)                                                           | 2,23 | 0,0027 |
| 1437401_at   | Igf1       | insulin-like growth factor 1                                                                  | 2,23 | 0,0007 |
| 1437279_x_at | Sdc1       | syndecan 1                                                                                    | 2,23 | 0,0004 |
| 1455396_at   | Atp8b1     | ATPase, class I, type 8B, member 1                                                            | 2,23 | 0,0009 |
| 1417828_at   | Aqp8       | aquaporin 8                                                                                   | 2,23 | 0,0358 |
| 1458685_at   | Garnl1     | GTPase activating RANGAP domain-like 1                                                        | 2,22 | 0,0416 |
| 1436240_at   | NA         | NA                                                                                            | 2,22 | 0,0207 |
|              | A230046K0  |                                                                                               |      |        |
| 1439450_x_at | 3Rik       | RIKEN cDNA A230046K03 gene                                                                    | 2,22 | 0,0041 |
| 1451999_at   | Ldb3       | LIM domain binding 3                                                                          | 2,22 | 0,0101 |
| 1419249_at   | Pftk1      | PFTAIRE protein kinase 1                                                                      | 2,22 | 0,0029 |
|              |            | ADP-ribosylation factor guanine nucleotide-exchange factor 1(brefeldin A-inhibited)           | 2,22 | 0,0211 |
| 1437104_at   | Arfgef1    |                                                                                               | 2,22 | 0,0211 |
| 1427347_s_at | Tubb2a     | tubulin, beta 2A                                                                              | 2,22 | 0,0163 |
|              | A230083H2  |                                                                                               |      |        |
| 1439274_at   | 2Rik       | RIKEN cDNA A230083H22 gene                                                                    | 2,21 | 0,0358 |
|              |            | establishment of cohesion 1 homolog 1 (S. cerevisiae)                                         | 2,21 | 0,0022 |
| 1424325_at   | Esco1      |                                                                                               | 2,21 | 0,0022 |
| 1418796_at   | Clec11a    | C-type lectin domain family 11, member a                                                      | 2,21 | 0,0010 |
| 1418944_at   | Cysltr1    | cysteinyl leukotriene receptor 1                                                              | 2,21 | 0,0031 |
| 1439970_at   | NA         | NA                                                                                            | 2,21 | 0,0127 |
|              |            | leukocyte immunoglobulin-like receptor, subfamily B, member 4                                 | 2,21 | 0,0001 |
| 1420394_s_at | Lilrb4     |                                                                                               | 2,21 | 0,0001 |
| 1418465_at   | Ncf4       | neutrophil cytosolic factor 4                                                                 | 2,21 | 0,0001 |
| 1443827_x_at | Fam20c     | family with sequence similarity 20, member C                                                  | 2,20 | 0,0007 |
| 1430695_at   | Tlr4       | toll-like receptor 4                                                                          | 2,20 | 0,0007 |
| 1425848_a_at | Dusp26     | dual specificity phosphatase 26 (putative)                                                    | 2,20 | 0,0063 |
| 1436312_at   | Ikzf1      | IKAROS family zinc finger 1                                                                   | 2,20 | 0,0103 |
| 1437222_x_at | Rrm2b      | ribonucleotide reductase M2 B (TP53 inducible)                                                | 2,20 | 0,0038 |
| 1437009_a_at | Rnf115     | ring finger protein 115                                                                       | 2,19 | 0,0001 |
| 1437158_at   | Nipbl      | Nipped-B homolog (Drosophila)                                                                 | 2,19 | 0,0016 |
|              |            | human immunodeficiency virus type I enhancer binding protein 3                                | 2,18 | 0,0013 |
| 1458802_at   | Hivep3     |                                                                                               | 2,18 | 0,0013 |
|              | 4921505C17 |                                                                                               |      |        |
| 1429810_at   | Rik        | RIKEN cDNA 4921505C17 gene                                                                    | 2,18 | 0,0040 |
| 1459860_x_at | Trim2      | tripartite motif-containing 2                                                                 | 2,18 | 0,0010 |
| 1437221_at   | Rrm2b      | ribonucleotide reductase M2 B (TP53 inducible)                                                | 2,18 | 0,0040 |
| 1434067_at   | Al662270   | expressed sequence Al662270                                                                   | 2,17 | 0,0074 |
| 1455886_at   | Cbl        | Casitas B-lineage lymphoma                                                                    | 2,16 | 0,0270 |
| 1439407_x_at | Tagln2     | transgelin 2                                                                                  | 2,16 | 0,0231 |
| 1417268_at   | Cd14       | CD14 antigen                                                                                  | 2,16 | 0,0264 |
| 1457458_at   | Zc3h4      | zinc finger CCCH-type containing 4                                                            | 2,16 | 0,0005 |
| 1419092_a_at | Slk        | STE20-like kinase (yeast)                                                                     | 2,16 | 0,0115 |
| 1448558_a_at | Pla2g4a    | phospholipase A2, group IVA (cytosolic, calcium-                                              | 2,16 | 0,0051 |

|              |            |                                                                                   |      |        |
|--------------|------------|-----------------------------------------------------------------------------------|------|--------|
|              |            | dependent)                                                                        |      |        |
| 1417721_s_at | Laptm5     | lysosomal-associated protein transmembrane 5                                      | 2,15 | 0,0011 |
| 1455660_at   | Csf2rb     | colony stimulating factor 2 receptor, beta, low-affinity (granulocyte-macrophage) | 2,15 | 0,0000 |
| 1438133_a_at | Cyr61      | cysteine rich protein 61                                                          | 2,15 | 0,0427 |
| 1418547_at   | Tfpi2      | tissue factor pathway inhibitor 2                                                 | 2,15 | 0,0142 |
| 1442277_at   | Chka       | choline kinase alpha                                                              | 2,15 | 0,0026 |
| 1430561_at   | Dnajb14    | DnaJ (Hsp40) homolog, subfamily B, member 14                                      | 2,14 | 0,0013 |
| 1423615_at   | Rnf115     | ring finger protein 115                                                           | 2,14 | 0,0002 |
| 1442827_at   | Tlr4       | toll-like receptor 4                                                              | 2,14 | 0,0002 |
| 1416687_at   | Plod2      | procollagen lysine, 2-oxoglutarate 5-dioxygenase 2                                | 2,13 | 0,0090 |
| 1451941_a_at | Fcgr2b     | Fc receptor, IgG, low affinity IIb                                                | 2,13 | 0,0176 |
| 1428730_at   | Krit1      | KRIT1, ankyrin repeat containing                                                  | 2,13 | 0,0014 |
| 1419666_x_at | Nupr1      | nuclear protein 1                                                                 | 2,12 | 0,0034 |
| 1418349_at   | Hbegf      | heparin-binding EGF-like growth factor                                            | 2,12 | 0,0093 |
| 1455019_x_at | Ckap4      | cytoskeleton-associated protein 4                                                 | 2,12 | 0,0015 |
| 1436892_at   | Spred2     | sprouty-related, EVH1 domain containing 2                                         | 2,10 | 0,0046 |
| 1418674_at   | Osmr       | oncostatin M receptor                                                             | 2,10 | 0,0002 |
| 1448617_at   | Cd53       | CD53 antigen                                                                      | 2,10 | 0,0001 |
| 1440461_at   | NA         | NA                                                                                | 2,10 | 0,0019 |
|              | 9430041P20 |                                                                                   |      |        |
| 1454613_at   | Rik        | RIKEN cDNA 9430041P20 gene                                                        | 2,10 | 0,0497 |
| 1452649_at   | Rtn4       | reticulon 4                                                                       | 2,10 | 0,0000 |
| 1440804_at   | Nktr       | natural killer tumor recognition sequence                                         | 2,09 | 0,0192 |
| 1439928_at   | NA         | NA                                                                                | 2,09 | 0,0054 |
|              |            | splicing factor, arginine/serine-rich 10 (transformer 2 homolog, Drosophila)      |      |        |
| 1441466_at   | Sfrs10     | splicing factor, arginine/serine-rich 10 (transformer 2 homolog, Drosophila)      | 2,09 | 0,0081 |
| 1452392_a_at | Wipi1      | WD repeat domain, phosphoinositide interacting 1                                  | 2,09 | 0,0098 |
| 1434413_at   | Igf1       | insulin-like growth factor 1                                                      | 2,09 | 0,0024 |
| 1457731_at   | Psip1      | PC4 and SFRS1 interacting protein 1                                               | 2,09 | 0,0067 |
| 1421116_a_at | Rtn4       | reticulon 4                                                                       | 2,09 | 0,0030 |
| 1443721_x_at | Sbno2      | strawberry notch homolog 2 (Drosophila)                                           | 2,08 | 0,0030 |
| 1431293_a_at | Cldnd1     | claudin domain containing 1                                                       | 2,08 | 0,0007 |
| 1459457_at   | Camk2d     | calcium/calmodulin-dependent protein kinase II, delta                             | 2,08 | 0,0001 |
| 1437419_at   | Bmp2k      | BMP2 inducible kinase                                                             | 2,08 | 0,0007 |
| 1426471_at   | Zfp52      | zinc finger protein 52                                                            | 2,08 | 0,0292 |
|              |            | sprouty protein with EVH-1 domain 1, related sequence                             |      |        |
| 1423161_s_at | Spred1     | sprouty protein with EVH-1 domain 1, related sequence                             | 2,08 | 0,0000 |
| 1446688_at   | NA         | NA                                                                                | 2,08 | 0,0001 |
| 1421499_a_at | Ptpn14     | protein tyrosine phosphatase, non-receptor type 14                                | 2,07 | 0,0018 |
| 1423184_at   | Itns2      | intersectin 2                                                                     | 2,07 | 0,0058 |
| 1452483_a_at | Cd44       | CD44 antigen                                                                      | 2,07 | 0,0026 |
| 1444638_at   | Ttn        | titin                                                                             | 2,07 | 0,0170 |
| 1451064_a_at | Psat1      | phosphoserine aminotransferase 1                                                  | 2,07 | 0,0144 |
| 1451978_at   | Loxl1      | lysyl oxidase-like 1                                                              | 2,07 | 0,0037 |
|              | 1110002E22 |                                                                                   |      |        |
| 1430786_at   | Rik        | RIKEN cDNA 1110002E22 gene                                                        | 2,07 | 0,0003 |
| 1417688_at   | Fam20c     | family with sequence similarity 20, member C                                      | 2,06 | 0,0000 |
| 1448160_at   | Lcp1       | lymphocyte cytosolic protein 1                                                    | 2,06 | 0,0257 |
| 1424504_at   | Rab22a     | RAB22A, member RAS oncogene family                                                | 2,05 | 0,0058 |
| 1422587_at   | Tmem45a    | transmembrane protein 45a                                                         | 2,05 | 0,0300 |
| 1451569_at   | Nr2c2      | nuclear receptor subfamily 2, group C, member 2                                   | 2,05 | 0,0057 |
| 1456112_at   | Tpr        | translocated promoter region                                                      | 2,05 | 0,0030 |
| 1437118_at   | Usp7       | ubiquitin specific peptidase 7                                                    | 2,05 | 0,0217 |
| 1419754_at   | Myo5a      | myosin VA                                                                         | 2,05 | 0,0045 |
| 1416953_at   | Ctgf       | connective tissue growth factor                                                   | 2,05 | 0,0293 |



|              |          |                                                                                                                                                       |      |        |
|--------------|----------|-------------------------------------------------------------------------------------------------------------------------------------------------------|------|--------|
| 1449175_at   | Gpr65    | G-protein coupled receptor 65                                                                                                                         | 2,05 | 0,0031 |
| 1424217_at   | Papola   | poly (A) polymerase alpha                                                                                                                             | 2,05 | 0,0045 |
| 1437811_x_at | NA       | NA                                                                                                                                                    | 2,04 | 0,0232 |
| 1430568_at   | Zc3h13   | zinc finger CCCH type containing 13                                                                                                                   | 2,04 | 0,0164 |
| 1416498_at   | Ppic     | peptidylprolyl isomerase C<br>cysteine-rich secretory protein LCCL domain<br>containing 1                                                             | 2,04 | 0,0488 |
| 1423352_at   | Crispld1 |                                                                                                                                                       | 2,04 | 0,0052 |
| 1439168_at   | Camk2d   | calcium/calmodulin-dependent protein kinase II, delta<br>sprouty protein with EVH-1 domain 1, related<br>sequence                                     | 2,03 | 0,0002 |
| 1423160_at   | Spred1   |                                                                                                                                                       | 2,03 | 0,0001 |
| 1427262_at   | Xist     | inactive X specific transcripts                                                                                                                       | 2,03 | 0,0029 |
| 1423249_at   | Nktr     | natural killer tumor recognition sequence                                                                                                             | 2,03 | 0,0127 |
| 1424443_at   | Tm6sf1   | transmembrane 6 superfamily member 1                                                                                                                  | 2,03 | 0,0318 |
| 1429954_at   | Clec4a3  | C-type lectin domain family 4, member a3                                                                                                              | 2,03 | 0,0195 |
| 1427298_at   | Dnm3os   | dynamamin 3, opposite strand                                                                                                                          | 2,03 | 0,0066 |
| 1455280_at   | Frem1    | Fras1 related extracellular matrix protein 1                                                                                                          | 2,03 | 0,0001 |
| 1448061_at   | Msr1     | macrophage scavenger receptor 1                                                                                                                       | 2,03 | 0,0009 |
| 1450297_at   | Il6      | interleukin 6<br>membrane-spanning 4-domains, subfamily A,<br>member 6B                                                                               | 2,02 | 0,0025 |
| 1418826_at   | Ms4a6b   |                                                                                                                                                       | 2,02 | 0,0373 |
| 1419220_at   | Xirp1    | xin actin-binding repeat containing 1                                                                                                                 | 2,02 | 0,0023 |
| 1424770_at   | Cald1    | caldesmon 1                                                                                                                                           | 2,02 | 0,0014 |
| 1457493_at   | Pten     | phosphatase and tensin homolog                                                                                                                        | 2,02 | 0,0017 |
| 1458912_at   | NA       | NA                                                                                                                                                    | 2,02 | 0,0188 |
| 1448392_at   | Sparc    | secreted acidic cysteine rich glycoprotein                                                                                                            | 2,02 | 0,0438 |
| 1443602_at   | NA       | NA                                                                                                                                                    | 2,02 | 0,0009 |
| 1434089_at   | Synpo    | synaptopodin                                                                                                                                          | 2,02 | 0,0122 |
| 1427910_at   | Cst6     | cystatin E/M                                                                                                                                          | 2,01 | 0,0141 |
| 1438992_x_at | Atf4     | activating transcription factor 4<br>epidermal growth factor receptor pathway substrate<br>15                                                         | 2,01 | 0,0404 |
| 1440729_at   | Eps15    |                                                                                                                                                       | 2,01 | 0,0003 |
| 1431162_a_at | Enah     | enabled homolog (Drosophila)                                                                                                                          | 2,00 | 0,0166 |
| 1438556_a_at | Tmod3    | tropomodulin 3<br>KDEL (Lys-Asp-Glu-Leu) endoplasmic reticulum<br>protein retention receptor 3                                                        | 2,00 | 0,0125 |
| 1418538_at   | Kdelr3   |                                                                                                                                                       | 2,00 | 0,0015 |
| 1451161_a_at | Emr1     | EGF-like module containing, mucin-like, hormone<br>receptor-like sequence 1<br>avian musculoaponeurotic fibrosarcoma (v-maf) AS42<br>oncogene homolog | 2,00 | 0,0264 |
| 1456060_at   | Maf      |                                                                                                                                                       | 1,99 | 0,0161 |
| 1439180_at   | Ino80d   | INO80 complex subunit D                                                                                                                               | 1,99 | 0,0041 |
| 1422860_at   | Nts      | neurotensin                                                                                                                                           | 1,99 | 0,0477 |
| 1449168_a_at | Akap2    | A kinase (PRKA) anchor protein 2                                                                                                                      | 1,99 | 0,0129 |
| 1454890_at   | Amot     | angiominin                                                                                                                                            | 1,99 | 0,0048 |
| 1421074_at   | Cyp7b1   | cytochrome P450, family 7, subfamily b, polypeptide<br>1<br>ribosomal RNA processing 12 homolog (S.<br>cerevisiae)                                    | 1,98 | 0,0040 |
| 1434239_at   | Rrp12    |                                                                                                                                                       | 1,98 | 0,0016 |
| 1455269_a_at | Coro1a   | coronin, actin binding protein 1A<br>sushi, von Willebrand factor type A, EGF and<br>pentraxin domain containing 1                                    | 1,98 | 0,0090 |
| 1419182_at   | Svep1    |                                                                                                                                                       | 1,98 | 0,0003 |
| 1420855_at   | Eln      | elastin                                                                                                                                               | 1,97 | 0,0180 |
| 1449446_at   | Ccdc59   | coiled-coil domain containing 59                                                                                                                      | 1,97 | 0,0076 |
| 1433944_at   | Rik      | RIKEN cDNA 1500017E21 gene                                                                                                                            | 1,97 | 0,0011 |
| 1448620_at   | Fcgr3    | Fc receptor, IgG, low affinity III                                                                                                                    | 1,97 | 0,0040 |
| 1424350_s_at | Lpgat1   | lysophosphatidylglycerol acyltransferase 1                                                                                                            | 1,97 | 0,0037 |
| 1416695_at   | Tspo     | translocator protein                                                                                                                                  | 1,97 | 0,0001 |

|              |                      |                                                                                 |      |        |
|--------------|----------------------|---------------------------------------------------------------------------------|------|--------|
| 1452722_a_at | Cul5                 | cullin 5                                                                        | 1,96 | 0,0007 |
| 1438476_a_at | Chd4                 | chromodomain helicase DNA binding protein 4                                     | 1,96 | 0,0015 |
| 1450915_at   | Ap3b1                | adaptor-related protein complex 3, beta 1 subunit                               | 1,96 | 0,0105 |
| 1453855_at   | Mxra7                | matrix-remodelling associated 7                                                 | 1,96 | 0,0034 |
| 1424674_at   | Slc39a6<br>A230046K0 | solute carrier family 39 (metal ion transporter),<br>member 6                   | 1,96 | 0,0013 |
| 1437719_x_at | 3Rik                 | RIKEN cDNA A230046K03 gene                                                      | 1,96 | 0,0178 |
| 1436778_at   | Cybb                 | cytochrome b-245, beta polypeptide                                              | 1,96 | 0,0044 |
| 1447164_at   | NA                   | NA                                                                              | 1,96 | 0,0234 |
| 1435343_at   | Dock10               | dedicator of cytokinesis 10                                                     | 1,96 | 0,0104 |
| 1427966_at   | Fam105b              | family with sequence similarity 105, member B                                   | 1,95 | 0,0003 |
| 1421041_s_at | Gsta2                | glutathione S-transferase, alpha 2 (Yc2)                                        | 1,95 | 0,0247 |
| 1438702_at   | Flrt2                | fibronectin leucine rich transmembrane protein 2                                | 1,95 | 0,0054 |
| 1457639_at   | Atp6v1h              | ATPase, H+ transporting, lysosomal V1 subunit H                                 | 1,95 | 0,0006 |
| 1449632_s_at | Fkbp10               | FK506 binding protein 10                                                        | 1,95 | 0,0026 |
| 1449280_at   | Esm1                 | endothelial cell-specific molecule 1                                            | 1,95 | 0,0404 |
| 1416065_a_at | Ankrd10              | ankyrin repeat domain 10                                                        | 1,95 | 0,0008 |
| 1460000_at   | Shisa3               | shisa homolog 3 ( <i>Xenopus laevis</i> )                                       | 1,95 | 0,0107 |
| 1422528_a_at | Zfp36l1              | zinc finger protein 36, C3H type-like 1                                         | 1,95 | 0,0057 |
| 1437284_at   | Fzd1                 | frizzled homolog 1 ( <i>Drosophila</i> )                                        | 1,94 | 0,0003 |
| 1437457_a_at | Mtpn                 | myotrophin                                                                      | 1,94 | 0,0040 |
| 1445824_at   | Zfp458               | zinc finger protein 458                                                         | 1,94 | 0,0089 |
| 1456251_x_at | Tspo                 | translocator protein                                                            | 1,94 | 0,0004 |
| 1428585_at   | Actn1                | actinin, alpha 1                                                                | 1,94 | 0,0066 |
| 1452385_at   | Usp53                | ubiquitin specific peptidase 53                                                 | 1,94 | 0,0048 |
| 1456489_at   | Pcf11                | cleavage and polyadenylation factor subunit homolog<br>( <i>S. cerevisiae</i> ) | 1,94 | 0,0065 |
| 1420380_at   | Ccl2                 | chemokine (C-C motif) ligand 2                                                  | 1,94 | 0,0434 |
| 1421624_a_at | Enah                 | enabled homolog ( <i>Drosophila</i> )                                           | 1,94 | 0,0046 |
| 1415806_at   | Plat                 | plasminogen activator, tissue                                                   | 1,94 | 0,0062 |
| 1416165_at   | Rab31                | RAB31, member RAS oncogene family                                               | 1,93 | 0,0004 |
| 1417876_at   | Fcgr1                | Fc receptor, IgG, high affinity I                                               | 1,93 | 0,0472 |
| 1442709_at   | NA                   | NA                                                                              | 1,93 | 0,0044 |
| 1459804_at   | Crebbp               | CREB binding protein                                                            | 1,93 | 0,0043 |
| 1419256_at   | Spnb2                | spectrin beta 2                                                                 | 1,93 | 0,0362 |
| 1452181_at   | Ckap4                | cytoskeleton-associated protein 4                                               | 1,93 | 0,0021 |
| 1438948_x_at | Tspo                 | translocator protein                                                            | 1,93 | 0,0003 |
| 1452035_at   | Col4a1               | collagen, type IV, alpha 1                                                      | 1,93 | 0,0079 |
| 1448550_at   | Lbp                  | lipopolysaccharide binding protein                                              | 1,93 | 0,0102 |
| 1446550_at   | Gspt1                | G1 to S phase transition 1                                                      | 1,92 | 0,0115 |
| 1448260_at   | Uchl1                | ubiquitin carboxy-terminal hydrolase L1                                         | 1,92 | 0,0442 |
| 1415859_at   | Eif3c                | eukaryotic translation initiation factor 3, subunit C                           | 1,92 | 0,0243 |
| 1420970_at   | Adcy7                | adenylate cyclase 7                                                             | 1,92 | 0,0104 |
| 1441262_at   | NA                   | NA                                                                              | 1,92 | 0,0007 |
| 1448213_at   | Anxa1                | annexin A1                                                                      | 1,92 | 0,0122 |
| 1456014_s_at | Trpt1                | tRNA phosphotransferase 1                                                       | 1,92 | 0,0033 |
| 1427526_at   | Fgfr1op2             | FGFR1 oncogene partner 2                                                        | 1,92 | 0,0125 |
| 1422903_at   | Ly86                 | lymphocyte antigen 86                                                           | 1,92 | 0,0424 |
| 1437339_s_at | Pcsk5                | proprotein convertase subtilisin/kexin type 5                                   | 1,92 | 0,0021 |
| 1450792_at   | Tyrobp               | TYRO protein tyrosine kinase binding protein                                    | 1,91 | 0,0094 |
| 1418430_at   | Kif5b                | kinesin family member 5B                                                        | 1,91 | 0,0034 |
| 1449227_at   | Ch25h                | cholesterol 25-hydroxylase                                                      | 1,91 | 0,0152 |
| 1453860_s_at | Nr3c1                | nuclear receptor subfamily 3, group C, member 1                                 | 1,91 | 0,0003 |
| 1436870_s_at | Afap1l2              | actin filament associated protein 1-like 2                                      | 1,91 | 0,0324 |
| 1459929_at   | Zfp568               | zinc finger protein 568                                                         | 1,91 | 0,0328 |

|              |                |                                                          |      |        |
|--------------|----------------|----------------------------------------------------------|------|--------|
| 1418774_a_at | Atp7a          | ATPase, Cu <sup>++</sup> transporting, alpha polypeptide | 1,91 | 0,0038 |
| 1423909_at   | Tmem176a       | transmembrane protein 176A                               | 1,90 | 0,0066 |
| 1442061_at   | Btbd7          | BTB (POZ) domain containing 7                            | 1,90 | 0,0069 |
| 1449201_at   | Star           | steroidogenic acute regulatory protein                   | 1,90 | 0,0018 |
| 1421851_at   | Mtap1b         | microtubule-associated protein 1B                        | 1,90 | 0,0246 |
|              | 5830415B17     |                                                          |      |        |
| 1433242_at   | Rik            | RIKEN cDNA 5830415B17 gene                               | 1,90 | 0,0028 |
| 1442197_at   | AI480624       | expressed sequence AI480624                              | 1,90 | 0,0026 |
|              |                | transient receptor potential cation channel, subfamily   |      |        |
| 1416801_at   | Trpm7          | M, member 7                                              | 1,90 | 0,0158 |
| 1430596_s_at | Vgll3          | vestigial like 3 (Drosophila)                            | 1,90 | 0,0427 |
| 1415943_at   | Sdc1           | syndecan 1                                               | 1,90 | 0,0063 |
| 1446565_at   | NA             | NA                                                       | 1,90 | 0,0381 |
|              | 2200002D01     |                                                          |      |        |
| 1428671_at   | Rik            | RIKEN cDNA 2200002D01 gene                               | 1,90 | 0,0281 |
|              | D17H6S56E      |                                                          |      |        |
| 1417821_at   | -5             | DNA segment, Chr 17, human D6S56E 5                      | 1,90 | 0,0025 |
| 1443863_at   | Fndc3a         | fibronectin type III domain containing 3A                | 1,89 | 0,0011 |
|              | AFFX-b-        |                                                          |      |        |
|              | ActinMur/M1248 |                                                          |      |        |
| 1_M_at       | Actb           | actin, beta                                              | 1,89 | 0,0041 |
|              |                | low density lipoprotein receptor-related protein 8,      |      |        |
| 1440882_at   | Lrp8           | apolipoprotein e receptor                                | 1,89 | 0,0055 |
| 1433842_at   | Lrrfip1        | leucine rich repeat (in FLII) interacting protein 1      | 1,89 | 0,0029 |
|              |                | UDP glucuronosyltransferase 1 family, polypeptide        |      |        |
| 1426261_s_at | Ugt1a6a        | A6A                                                      | 1,89 | 0,0027 |
| 1427456_at   | Wdfy3          | WD repeat and FYVE domain containing 3                   | 1,89 | 0,0354 |
|              |                | tumor necrosis factor receptor superfamily, member       |      |        |
| 1418572_x_at | Tnfrsf12a      | 12a                                                      | 1,89 | 0,0056 |
| 1422868_s_at | Gda            | guanine deaminase                                        | 1,88 | 0,0014 |
|              |                | PRP38 pre-mRNA processing factor 38 (yeast)              |      |        |
| 1456506_at   | Prpf38b        | domain containing B                                      | 1,88 | 0,0025 |
| 1459641_at   | NA             | NA                                                       | 1,88 | 0,0494 |
| 1453787_at   | Txndc13        | thioredoxin domain containing 13                         | 1,88 | 0,0357 |
|              | 6330406115     |                                                          |      |        |
| 1426937_at   | Rik            | RIKEN cDNA 6330406115 gene                               | 1,88 | 0,0329 |
| 1418760_at   | Rdh11          | retinol dehydrogenase 11                                 | 1,88 | 0,0016 |
| 1436319_at   | Sulf1          | sulfatase 1                                              | 1,88 | 0,0478 |
| 1423585_at   | Polr2b         | polymerase (RNA) II (DNA directed) polypeptide B         | 1,88 | 0,0088 |
| 1417419_at   | Ccnd1          | cyclin D1                                                | 1,88 | 0,0465 |
|              |                | protein kinase, AMP-activated, alpha 2 catalytic         |      |        |
| 1429464_at   | Prkaa2         | subunit                                                  | 1,87 | 0,0313 |
| 1450401_at   | Tgs1           | trimethylguanosine synthase homolog (S. cerevisiae)      | 1,87 | 0,0024 |
| 1442395_at   | NA             | NA                                                       | 1,87 | 0,0119 |
| 1439650_at   | Rtn4           | reticulon 4                                              | 1,87 | 0,0156 |
| 1426754_x_at | Ckap4          | cytoskeleton-associated protein 4                        | 1,87 | 0,0048 |
|              | A930041I02     |                                                          |      |        |
| 1445081_at   | Rik            | RIKEN cDNA A930041I02 gene                               | 1,87 | 0,0003 |
| 1456791_at   | Zfp800         | zinc finger protein 800                                  | 1,87 | 0,0163 |
| 1449682_s_at | Tubb2a-ps2     | tubulin, beta 2a, pseudogene 2                           | 1,86 | 0,0277 |
|              |                | splicing factor proline/glutamine rich (polypyrimidine   |      |        |
| 1436898_at   | Sfpq           | tract binding protein associated)                        | 1,86 | 0,0018 |
| 1448673_at   | Pvrl3          | poliovirus receptor-related 3                            | 1,86 | 0,0058 |
| 1417507_at   | Cyb561         | cytochrome b-561                                         | 1,86 | 0,0001 |
| 1443682_at   | NA             | NA                                                       | 1,86 | 0,0197 |
|              | 2310057M2      |                                                          |      |        |
| 1429508_at   | 1Rik           | RIKEN cDNA 2310057M21 gene                               | 1,86 | 0,0008 |
| 1416741_at   | Col5a1         | collagen, type V, alpha 1                                | 1,85 | 0,0041 |

|                |            |                                                      |      |        |
|----------------|------------|------------------------------------------------------|------|--------|
| 1418829_a_at   | Eno2       | enolase 2, gamma neuronal                            | 1,85 | 0,0019 |
| 1419123_a_at   | Pdgcfc     | platelet-derived growth factor, C polypeptide        | 1,85 | 0,0034 |
| 1456951_at     | NA         | NA                                                   | 1,85 | 0,0077 |
| 1440106_at     | NA         | NA                                                   | 1,85 | 0,0133 |
|                | 5830417110 |                                                      |      |        |
| 1430680_a_at   | Rik        | RIKEN cDNA 5830417110 gene                           | 1,85 | 0,0016 |
| 1441811_x_at   | Tmem176a   | transmembrane protein 176A                           | 1,85 | 0,0038 |
| 1418024_at     | Narg1      | NMDA receptor-regulated gene 1                       | 1,85 | 0,0292 |
| 1442038_at     | Rbm26      | RNA binding motif protein 26                         | 1,85 | 0,0041 |
| AFFX-b-        |            |                                                      |      |        |
| ActinMur/M1248 |            |                                                      |      |        |
| 1_5_at         | Actb       | actin, beta                                          | 1,85 | 0,0024 |
| 1448239_at     | Hmox1      | heme oxygenase (decycling) 1                         | 1,85 | 0,0158 |
| 1417178_at     | Gipc2      | GIPC PDZ domain containing family, member 2          | 1,84 | 0,0001 |
| 1440999_at     | Zfp697     | zinc finger protein 697                              | 1,84 | 0,0018 |
| 1424687_at     | Heatr6     | HEAT repeat containing 6                             | 1,84 | 0,0050 |
| 1439672_at     | NA         | NA                                                   | 1,84 | 0,0343 |
| 1448606_at     | Lpar1      | lysophosphatidic acid receptor 1                     | 1,84 | 0,0035 |
| 1459635_at     | NA         | NA                                                   | 1,84 | 0,0055 |
|                |            | tumor necrosis factor receptor superfamily, member   |      |        |
| 1418571_at     | Tnfrsf12a  | 12a                                                  | 1,84 | 0,0084 |
| 1455096_at     | Flrt2      | fibronectin leucine rich transmembrane protein 2     | 1,84 | 0,0417 |
| 1458282_at     | NA         | NA                                                   | 1,83 | 0,0256 |
| 1422910_s_at   | Smc6       | structural maintenance of chromosomes 6              | 1,83 | 0,0449 |
| 1417836_at     | Gpx7       | glutathione peroxidase 7                             | 1,83 | 0,0045 |
| 1453269_at     | Unc5b      | unc-5 homolog B (C. elegans)                         | 1,83 | 0,0009 |
| 1434891_at     | Ptgfrn     | prostaglandin F2 receptor negative regulator         | 1,83 | 0,0186 |
| 1438892_at     | Dep1       | diabetic embryopathy 1                               | 1,83 | 0,0395 |
| 1449311_at     | Bach1      | BTB and CNC homology 1                               | 1,83 | 0,0293 |
| 1437305_at     | Zfp770     | zinc finger protein 770                              | 1,83 | 0,0107 |
| 1456102_a_at   | Cul5       | cullin 5                                             | 1,83 | 0,0018 |
| 1458308_at     | Sbno2      | strawberry notch homolog 2 (Drosophila)              | 1,83 | 0,0451 |
| 1457908_at     | NA         | NA                                                   | 1,83 | 0,0092 |
|                | 1110002E22 |                                                      |      |        |
| 1447870_x_at   | Rik        | RIKEN cDNA 1110002E22 gene                           | 1,83 | 0,0003 |
| 1423547_at     | Lyz2       | lysozyme 2                                           | 1,83 | 0,0401 |
| 1444004_at     | Thoc2      | THO complex 2                                        | 1,83 | 0,0243 |
| 1441643_at     | Mrz 03     | membrane-associated ring finger (C3HC4) 3            | 1,83 | 0,0211 |
| 1416572_at     | Mmp14      | matrix metalloproteinase 14 (membrane-inserted)      | 1,82 | 0,0424 |
| 1452014_a_at   | Igf1       | insulin-like growth factor 1                         | 1,82 | 0,0039 |
| 1438200_at     | Sulf1      | sulfatase 1                                          | 1,82 | 0,0291 |
| 1426777_a_at   | Wasl       | Wiskott-Aldrich syndrome-like (human)                | 1,82 | 0,0031 |
| 1439191_at     | NA         | NA                                                   | 1,82 | 0,0078 |
| 1418296_at     | Fxyd5      | FXFD domain-containing ion transport regulator 5     | 1,82 | 0,0001 |
| 1416246_a_at   | Coro1a     | coronin, actin binding protein 1A                    | 1,82 | 0,0147 |
| 1427076_at     | Mpeg1      | macrophage expressed gene 1                          | 1,82 | 0,0001 |
| 1441677_at     | NA         | NA                                                   | 1,82 | 0,0241 |
| 1436051_at     | Myo5a      | myosin VA                                            | 1,82 | 0,0094 |
| 1429658_a_at   | Smc2       | structural maintenance of chromosomes 2              | 1,82 | 0,0413 |
| 1420170_at     | Myh9       | myosin, heavy polypeptide 9, non-muscle              | 1,82 | 0,0023 |
| 1416120_at     | Rrm2       | ribonucleotide reductase M2                          | 1,82 | 0,0431 |
|                |            | a disintegrin-like and metalloproteinase (reprolysin |      |        |
| 1452595_at     | Adamts4    | type) with thrombospondin type 1 motif, 4            | 1,82 | 0,0023 |
| 1449282_at     | Cysltr1    | cysteinyl leukotriene receptor 1                     | 1,81 | 0,0095 |
| 1455399_at     | Cnksr1     | connector enhancer of kinase suppressor of Ras 1     | 1,81 | 0,0028 |
| 1429882_at     | 6820431F20 | RIKEN cDNA 6820431F20 gene                           | 1,81 | 0,0069 |

|              |            |                                                       |      |        |
|--------------|------------|-------------------------------------------------------|------|--------|
|              | Rik        |                                                       |      |        |
| 1427257_at   | Vcan       | versican                                              | 1,81 | 0,0012 |
| 1424704_at   | Runx2      | runt related transcription factor 2                   | 1,81 | 0,0264 |
| 1459488_at   | NA         | NA                                                    | 1,81 | 0,0130 |
| 1418424_at   | Tnfaip6    | tumor necrosis factor alpha induced protein 6         | 1,81 | 0,0024 |
| 1437162_at   | NA         | NA                                                    | 1,81 | 0,0066 |
| 1452117_a_at | Fyb        | FYN binding protein                                   | 1,81 | 0,0006 |
| 1450986_at   | Nop58      | NOP58 ribonucleoprotein homolog (yeast)               | 1,81 | 0,0054 |
| 1434599_a_at | Tjp2       | tight junction protein 2                              | 1,81 | 0,0045 |
| 1438688_at   | Srrm2      | serine/arginine repetitive matrix 2                   | 1,81 | 0,0048 |
|              |            | a disintegrin and metallopeptidase domain 12 (meltrin |      |        |
| 1421172_at   | Adam12     | alpha)                                                | 1,80 | 0,0407 |
| 1450093_s_at | Zbtb7a     | zinc finger and BTB domain containing 7a              | 1,80 | 0,0187 |
| 1420985_at   | Ash1l      | ash1 (absent, small, or homeotic)-like (Drosophila)   | 1,80 | 0,0137 |
| 1419144_at   | Cd163      | CD163 antigen                                         | 1,80 | 0,0034 |
|              | A930004J17 |                                                       |      |        |
| 1457760_at   | Rik        | RIKEN cDNA A930004J17 gene                            | 1,80 | 0,0186 |
| 1442569_at   | NA         | NA                                                    | 1,80 | 0,0049 |
| 1423065_at   | Dnmt3a     | DNA methyltransferase 3A                              | 1,80 | 0,0139 |
| 1451596_a_at | Sphk1      | sphingosine kinase 1                                  | 1,80 | 0,0322 |
| 1457357_at   | Tlk2       | tousled-like kinase 2 (Arabidopsis)                   | 1,80 | 0,0431 |
|              | 6030451C04 |                                                       |      |        |
| 1453698_at   | Rik        | RIKEN cDNA 6030451C04 gene                            | 1,80 | 0,0151 |
| 1419038_a_at | Csnk2a1    | casein kinase 2, alpha 1 polypeptide                  | 1,80 | 0,0151 |
| 1421375_a_at | S100a6     | S100 calcium binding protein A6 (calcyclin)           | 1,80 | 0,0005 |
| 1452740_at   | Myh10      | myosin, heavy polypeptide 10, non-muscle              | 1,79 | 0,0268 |
|              | 5133401H06 |                                                       |      |        |
| 1428663_at   | Rik        | RIKEN cDNA 5133401H06 gene                            | 1,79 | 0,0015 |
|              | 6330406I15 |                                                       |      |        |
| 1452244_at   | Rik        | RIKEN cDNA 6330406I15 gene                            | 1,79 | 0,0003 |
| 1422803_at   | Fstl3      | follicle-stimulating-like 3                           | 1,79 | 0,0231 |
| 1457708_at   | Mbd4       | methyl-CpG binding domain protein 4                   | 1,79 | 0,0063 |
| 1440563_at   | NA         | NA                                                    | 1,79 | 0,0005 |
| 1433434_at   | AW551984   | expressed sequence AW551984                           | 1,79 | 0,0000 |
| 1453240_a_at | Gcap14     | granule cell antiserum positive 14                    | 1,79 | 0,0004 |
| 1438131_at   | Fbxw2      | F-box and WD-40 domain protein 2                      | 1,79 | 0,0250 |
| 1441644_at   | NA         | NA                                                    | 1,79 | 0,0237 |
| 1447621_s_at | Tmem173    | transmembrane protein 173                             | 1,79 | 0,0117 |
| 1431609_a_at | Acp5       | acid phosphatase 5, tartrate resistant                | 1,79 | 0,0009 |
| 1436178_at   | Leprel1    | leprecan-like 1                                       | 1,79 | 0,0027 |
| 1418536_at   | H2-Q7      | histocompatibility 2, Q region locus 7                | 1,78 | 0,0483 |
| 1455834_x_at | Tacc3      | transforming, acidic coiled-coil containing protein 3 | 1,78 | 0,0097 |
| 1435144_at   | NA         | NA                                                    | 1,78 | 0,0009 |
| 1419015_at   | Wisp2      | WNT1 inducible signaling pathway protein 2            | 1,78 | 0,0015 |
| 1436904_at   | Med13      | mediator complex subunit 13                           | 1,78 | 0,0029 |
| 1418269_at   | Loxl3      | lysyl oxidase-like 3                                  | 1,78 | 0,0038 |
| 1417869_s_at | Ctsz       | cathepsin Z                                           | 1,78 | 0,0144 |
|              |            | excision repair cross-complementing rodent repair     |      |        |
| 1442604_at   | Ercc6      | deficiency, complementation group 6                   | 1,78 | 0,0007 |
|              | C230081A1  |                                                       |      |        |
| 1440293_at   | 3Rik       | RIKEN cDNA C230081A13 gene                            | 1,78 | 0,0079 |
| 1451335_at   | Plac8      | placenta-specific 8                                   | 1,78 | 0,0051 |
| 1451537_at   | Chi3l1     | chitinase 3-like 1                                    | 1,78 | 0,0005 |
| 1451642_at   | Kif1b      | kinesin family member 1B                              | 1,78 | 0,0158 |
| 1434875_a_at | Hmgn3      | high mobility group nucleosomal binding domain 3      | 1,78 | 0,0097 |
| 1424051_at   | Col4a2     | collagen, type IV, alpha 2                            | 1,78 | 0,0031 |

|              |                     |                                                                                                                                |      |        |
|--------------|---------------------|--------------------------------------------------------------------------------------------------------------------------------|------|--------|
| 1433972_at   | Camta1<br>6430548M0 | calmodulin binding transcription activator 1                                                                                   | 1,78 | 0,0026 |
| 1426446_at   | 8Rik                | RIKEN cDNA 6430548M08 gene                                                                                                     | 1,77 | 0,0008 |
| 1444494_at   | Kbtbd10             | kelch repeat and BTB (POZ) domain containing 10                                                                                | 1,77 | 0,0023 |
| 1455795_at   | Dse                 | dermatan sulfate epimerase                                                                                                     | 1,77 | 0,0093 |
| 1424769_s_at | Cald1<br>4632427E13 | caldesmon 1                                                                                                                    | 1,77 | 0,0163 |
| 1429331_at   | Rik                 | RIKEN cDNA 4632427E13 gene                                                                                                     | 1,77 | 0,0091 |
| 1455332_x_at | Fcgr2b              | Fc receptor, IgG, low affinity IIb                                                                                             | 1,77 | 0,0150 |
| 1422556_at   | Gna13               | guanine nucleotide binding protein, alpha 13                                                                                   | 1,77 | 0,0322 |
| 1441001_at   | AI225934            | expressed sequence AI225934                                                                                                    | 1,77 | 0,0264 |
| 1449315_at   | Odz3                | odd Oz/ten-m homolog 3 (Drosophila)                                                                                            | 1,77 | 0,0031 |
| 1426604_at   | Rnasel              | ribonuclease L (2', 5'-oligoadenylate synthetase-dependent)<br>serine (or cysteine) peptidase inhibitor, clade B, member 1a    | 1,77 | 0,0038 |
| 1448301_s_at | Serp1b1a            |                                                                                                                                | 1,77 | 0,0033 |
| 1434068_s_at | AI662270            | expressed sequence AI662270                                                                                                    | 1,77 | 0,0029 |
| 1420249_s_at | Ccl6                | chemokine (C-C motif) ligand 6                                                                                                 | 1,77 | 0,0042 |
| 1437047_at   | Zfp664              | zinc finger protein 664                                                                                                        | 1,77 | 0,0150 |
| 1454200_at   | Zeb2                | zinc finger E-box binding homeobox 2                                                                                           | 1,77 | 0,0187 |
| 1421187_at   | Ccr2                | chemokine (C-C motif) receptor 2                                                                                               | 1,77 | 0,0014 |
| 1423060_at   | Pa2g4               | proliferation-associated 2G4                                                                                                   | 1,77 | 0,0050 |
| 1428896_at   | Pdgfrl              | platelet-derived growth factor receptor-like                                                                                   | 1,77 | 0,0465 |
| 1417045_at   | Bid                 | BH3 interacting domain death agonist                                                                                           | 1,77 | 0,0023 |
| 1446624_at   | Fktn                | fukutin                                                                                                                        | 1,76 | 0,0324 |
| 1449870_a_at | Atp6v0a2            | ATPase, H+ transporting, lysosomal V0 subunit A2                                                                               | 1,76 | 0,0016 |
| 1419603_at   | Ifi204              | interferon activated gene 204                                                                                                  | 1,76 | 0,0216 |
| 1436986_at   | Sntb2               | syntrophin, basic 2                                                                                                            | 1,76 | 0,0001 |
| 1425098_at   | Zfp106              | zinc finger protein 106                                                                                                        | 1,76 | 0,0046 |
| 1456110_at   | Ankrd11             | ankyrin repeat domain 11<br>membrane protein, palmitoylated 7 (MAGUK p55 subfamily member 7)                                   | 1,76 | 0,0231 |
| 1432216_s_at | Mpp7                |                                                                                                                                | 1,76 | 0,0171 |
| 1437208_at   | Sep 10              | septin 10                                                                                                                      | 1,76 | 0,0023 |
| 1424265_at   | Npl                 | N-acetylneuraminidase                                                                                                          | 1,75 | 0,0368 |
| 1439040_at   | Cenpe               | centromere protein E                                                                                                           | 1,75 | 0,0284 |
| 1436040_at   | Snora44             | small nucleolar RNA, H/ACA box 44                                                                                              | 1,75 | 0,0324 |
| 1417936_at   | Ccl9                | chemokine (C-C motif) ligand 9                                                                                                 | 1,75 | 0,0242 |
| 1442027_at   | Nbeal1              | neurobeachin like 1                                                                                                            | 1,75 | 0,0034 |
| 1424270_at   | Dclk1               | doublecortin-like kinase 1                                                                                                     | 1,75 | 0,0080 |
| 1434236_at   | Zdhhc20             | zinc finger, DHHC domain containing 20                                                                                         | 1,75 | 0,0048 |
| 1422706_at   | Pmepa1              | prostate transmembrane protein, androgen induced 1<br>v-maf musculoaponeurotic fibrosarcoma oncogene family, protein B (avian) | 1,75 | 0,0007 |
| 1451716_at   | Mafb<br>9030612M1   |                                                                                                                                | 1,75 | 0,0013 |
| 1435163_at   | 3Rik                | RIKEN cDNA 9030612M13 gene                                                                                                     | 1,75 | 0,0021 |
| 1437671_x_at | Prss23              | protease, serine, 23                                                                                                           | 1,75 | 0,0016 |
| 1448749_at   | Plek                | pleckstrin                                                                                                                     | 1,74 | 0,0177 |
| 1436937_at   | Rbms3               | RNA binding motif, single stranded interacting protein                                                                         | 1,74 | 0,0001 |
| 1451458_at   | Tmem2               | transmembrane protein 2                                                                                                        | 1,74 | 0,0370 |
| 1435394_s_at | Rhoc                | ras homolog gene family, member C                                                                                              | 1,74 | 0,0025 |
| 1438303_at   | Tgfb2               | transforming growth factor, beta 2                                                                                             | 1,74 | 0,0004 |
| 1446268_at   | Cyth3               | cytohesin 3                                                                                                                    | 1,74 | 0,0100 |
| 1438684_at   | Nuak1               | NUAK family, SNF1-like kinase, 1                                                                                               | 1,74 | 0,0085 |
| 1444295_at   | Neo1                | neogenin                                                                                                                       | 1,74 | 0,0364 |
| 1450871_a_at | Bcat1               | branched chain aminotransferase 1, cytosolic                                                                                   | 1,74 | 0,0005 |
| 1420474_at   | Mtpn                | myotrophin                                                                                                                     | 1,73 | 0,0161 |

|              |            |                                                                                                                           |      |        |
|--------------|------------|---------------------------------------------------------------------------------------------------------------------------|------|--------|
| 1450656_at   | Gna13      | guanine nucleotide binding protein, alpha 13                                                                              | 1,73 | 0,0094 |
| 1441112_at   | LOC667118  | similar to Zinc finger BED domain containing protein 4 protein phosphatase 2, regulatory subunit B (B56), epsilon isoform | 1,73 | 0,0246 |
| 1428463_a_at | Ppp2r5e    |                                                                                                                           | 1,73 | 0,0101 |
| 1445306_at   | NA         | NA                                                                                                                        | 1,73 | 0,0018 |
| 1417868_a_at | Ctsz       | cathepsin Z                                                                                                               | 1,73 | 0,0393 |
| 1436236_x_at | Cot1l      | coactosin-like 1 (Dictyostelium)                                                                                          | 1,73 | 0,0108 |
| 1424801_at   | Enah       | enabled homolog (Drosophila)                                                                                              | 1,73 | 0,0034 |
| 1453572_a_at | Plp2       | proteolipid protein 2                                                                                                     | 1,73 | 0,0003 |
| 1444574_at   | NA         | NA                                                                                                                        | 1,73 | 0,0341 |
| 1460159_at   | Mysm1      | myb-like, SWIRM and MPN domains 1                                                                                         | 1,73 | 0,0026 |
|              | E430002G0  |                                                                                                                           |      |        |
| 1433529_at   | 5Rik       | RIKEN cDNA E430002G05 gene                                                                                                | 1,73 | 0,0128 |
| 1422340_a_at | Actg2      | actin, gamma 2, smooth muscle, enteric                                                                                    | 1,73 | 0,0004 |
| 1434020_at   | Pdap1      | PDGFA associated protein 1                                                                                                | 1,73 | 0,0080 |
| 1443603_at   | NA         | NA                                                                                                                        | 1,73 | 0,0056 |
| 1455870_at   | Akap2      | A kinase (PRKA) anchor protein 2                                                                                          | 1,73 | 0,0203 |
| 1417214_at   | Rab27b     | RAB27b, member RAS oncogene family                                                                                        | 1,73 | 0,0005 |
|              | 2810021B07 |                                                                                                                           |      |        |
| 1428921_at   | Rik        | RIKEN cDNA 2810021B07 gene                                                                                                | 1,72 | 0,0106 |
| 1435890_at   | Atl3       | atlastin GTPase 3                                                                                                         | 1,72 | 0,0051 |
| 1422514_at   | Aebp1      | AE binding protein 1                                                                                                      | 1,72 | 0,0041 |
|              |            | v-abl Abelson murine leukemia viral oncogene homolog 2 (arg, Abelson-related gene)                                        | 1,72 | 0,0358 |
| 1455682_at   | Abl2       |                                                                                                                           | 1,72 | 0,0014 |
| 1424800_at   | Enah       | enabled homolog (Drosophila)                                                                                              | 1,72 | 0,0014 |
| 1440260_at   | Ccdc58     | coiled-coil domain containing 58                                                                                          | 1,72 | 0,0177 |
| 1437308_s_at | F2r        | coagulation factor II (thrombin) receptor signal peptidase complex subunit 3 homolog (S. cerevisiae)                      | 1,72 | 0,0000 |
| 1451175_at   | Spcs3      | G protein-coupled receptor, family C, group 5, member B                                                                   | 1,72 | 0,0012 |
| 1451411_at   | Gprc5b     | nuclear factor of kappa light polypeptide gene enhancer in B-cells inhibitor, epsilon                                     | 1,72 | 0,0052 |
| 1458299_s_at | Nfkbie     |                                                                                                                           | 1,72 | 0,0045 |
| 1459350_at   | NA         | NA                                                                                                                        | 1,71 | 0,0025 |
| 1436512_at   | Arl4c      | ADP-ribosylation factor-like 4C                                                                                           | 1,71 | 0,0215 |
| 1419482_at   | C3ar1      | complement component 3a receptor 1                                                                                        | 1,71 | 0,0442 |
| 1435644_at   | Sh3pxd2b   | SH3 and PX domains 2B                                                                                                     | 1,71 | 0,0125 |
| 1426505_at   | Evi2a      | ecotropic viral integration site 2a                                                                                       | 1,71 | 0,0133 |
| 1452445_at   | Slc41a2    | solute carrier family 41, member 2                                                                                        | 1,71 | 0,0008 |
| 1419625_at   | Hspa1l     | heat shock protein 1-like                                                                                                 | 1,71 | 0,0096 |
| 1452368_at   | Bcr        | breakpoint cluster region                                                                                                 | 1,70 | 0,0071 |
| 1417359_at   | Mfap2      | microfibrillar-associated protein 2                                                                                       | 1,70 | 0,0211 |
|              |            | myeloid/lymphoid or mixed-lineage leukemia (trithorax homolog, Drosophila); translocated to, 11                           | 1,70 | 0,0034 |
| 1416313_at   | Mllt11     |                                                                                                                           | 1,70 | 0,0034 |
| 1435597_at   | Atad5      | ATPase family, AAA domain containing 5                                                                                    | 1,70 | 0,0232 |
| 1423311_s_at | Tpbg       | trophoblast glycoprotein                                                                                                  | 1,70 | 0,0008 |
| 1434286_at   | Trps1      | trichorhinophalangeal syndrome I (human)                                                                                  | 1,70 | 0,0448 |
| 1451621_at   | Pppde1     | PPPDE peptidase domain containing 1                                                                                       | 1,70 | 0,0127 |
| 1423310_at   | Tpbg       | trophoblast glycoprotein                                                                                                  | 1,70 | 0,0007 |
| 1418599_at   | Col11a1    | collagen, type XI, alpha 1                                                                                                | 1,70 | 0,0015 |
| 1447930_at   | Baz1a      | bromodomain adjacent to zinc finger domain 1A                                                                             | 1,70 | 0,0395 |
|              | 4632419I22 |                                                                                                                           |      |        |
| 1436247_at   | Rik        | RIKEN cDNA 4632419I22 gene                                                                                                | 1,70 | 0,0497 |
| 1440351_at   | NA         | NA                                                                                                                        | 1,70 | 0,0004 |
| 1427260_a_at | Tpm3       | tropomyosin 3, gamma                                                                                                      | 1,70 | 0,0185 |
|              |            | nuclear factor of kappa light polypeptide gene enhancer in B-cells inhibitor, zeta                                        | 1,70 | 0,0105 |
| 1448728_a_at | Nfkbiz     |                                                                                                                           | 1,70 | 0,0105 |

|              |           |                                                                     |      |        |
|--------------|-----------|---------------------------------------------------------------------|------|--------|
| 1416379_at   | Panx1     | pannexin 1                                                          | 1,70 | 0,0015 |
| 1424680_at   | Fam26e    | family with sequence similarity 26, member E                        | 1,70 | 0,0173 |
| 1451022_at   | Lrp6      | low density lipoprotein receptor-related protein 6                  | 1,69 | 0,0196 |
| 1426366_at   | Eif2c2    | eukaryotic translation initiation factor 2C, 2                      | 1,69 | 0,0041 |
| 1425639_at   | Adap2     | ArfGAP with dual PH domains 2                                       | 1,69 | 0,0286 |
| 1422046_at   | Itgam     | integrin alpha M                                                    | 1,69 | 0,0114 |
| 1416226_at   | Arpc1b    | actin related protein 2/3 complex, subunit 1B                       | 1,69 | 0,0493 |
| 1422013_at   | Clec4a2   | C-type lectin domain family 4, member a2                            | 1,69 | 0,0158 |
| 1434700_at   | G2e3      | G2/M-phase specific E3 ubiquitin ligase                             | 1,69 | 0,0263 |
| 1434903_s_at | Il1rl2    | interleukin 1 receptor-like 2                                       | 1,69 | 0,0097 |
| 1444075_at   | Filip1    | filamin A interacting protein 1                                     | 1,69 | 0,0131 |
| 1460086_at   | Rc3h2     | ring finger and CCCH-type zinc finger domains 2                     | 1,69 | 0,0384 |
| 1439998_at   | Jmjd1c    | jumonji domain containing 1C                                        | 1,69 | 0,0269 |
| 1419537_at   | Tcfec     | transcription factor EC                                             | 1,69 | 0,0017 |
| 1446095_at   | Airn      | antisense Igf2r RNA                                                 | 1,69 | 0,0174 |
| 1433982_at   | Usp28     | ubiquitin specific peptidase 28                                     | 1,69 | 0,0003 |
| 1418724_at   | Cfi       | complement component factor i                                       | 1,68 | 0,0029 |
| 1424065_at   | Edem1     | ER degradation enhancer, mannosidase alpha-like 1                   | 1,68 | 0,0005 |
| 1426713_s_at | Eprs      | glutamyl-prolyl-tRNA synthetase                                     | 1,68 | 0,0044 |
| 1435888_at   | Egfr      | epidermal growth factor receptor                                    | 1,68 | 0,0425 |
| 1448471_a_at | Ctla2a    | cytotoxic T lymphocyte-associated protein 2 alpha                   | 1,68 | 0,0062 |
| 1426542_at   | Endod1    | endonuclease domain containing 1                                    | 1,68 | 0,0006 |
| 1449195_s_at | Cxcl16    | chemokine (C-X-C motif) ligand 16                                   | 1,68 | 0,0107 |
| 1419309_at   | Pdpr      | podoplanin                                                          | 1,68 | 0,0162 |
| 1423570_at   | Abcg1     | ATP-binding cassette, sub-family G (WHITE), member 1                | 1,68 | 0,0243 |
| 1452158_at   | Eprs      | glutamyl-prolyl-tRNA synthetase                                     | 1,68 | 0,0053 |
| 1425565_at   | Rest      | RE1-silencing transcription factor                                  | 1,68 | 0,0170 |
| 1433796_at   | Endod1    | endonuclease domain containing 1                                    | 1,68 | 0,0266 |
| 1440163_at   | Ccnk      | cyclin K                                                            | 1,68 | 0,0015 |
| 1440392_at   | Akap13    | A kinase (PRKA) anchor protein 13                                   | 1,68 | 0,0033 |
| 1444435_at   | Vps13b    | vacuolar protein sorting 13B (yeast)                                | 1,68 | 0,0264 |
| 1436714_at   | Lpp       | LIM domain containing preferred translocation partner in lipoma     | 1,68 | 0,0062 |
| 1439741_x_at | Uck2      | uridine-cytidine kinase 2                                           | 1,67 | 0,0104 |
| 1434513_at   | Atp13a3   | ATPase type 13A3                                                    | 1,67 | 0,0259 |
| 1443675_at   | NA        | NA                                                                  | 1,67 | 0,0025 |
| 1421064_at   | Mpp5      | membrane protein, palmitoylated 5 (MAGUK p55 subfamily member 5)    | 1,67 | 0,0138 |
| 1452783_at   | Fndc3b    | fibronectin type III domain containing 3B                           | 1,67 | 0,0097 |
| 1437473_at   | Maf       | avian musculoaponeurotic fibrosarcoma (v-maf) AS42 oncogene homolog | 1,67 | 0,0115 |
| 1424607_a_at | 100039204 | predicted gene, 100039204                                           | 1,67 | 0,0057 |
| 1423771_at   | Prkcdp    | protein kinase C, delta binding protein                             | 1,67 | 0,0483 |
| 1444537_at   | AI429363  | expressed sequence AI429363                                         | 1,67 | 0,0008 |
| 1424187_at   | Ccdc80    | coiled-coil domain containing 80                                    | 1,67 | 0,0478 |
| 1449978_at   | Zfy2      | zinc finger protein 2, Y linked                                     | 1,67 | 0,0123 |
| 1443801_at   | NA        | NA                                                                  | 1,67 | 0,0274 |
| 1433716_x_at | Gfra2     | glial cell line derived neurotrophic factor family receptor alpha 2 | 1,67 | 0,0495 |
| 1460004_x_at | Stx6      | syntaxin 6                                                          | 1,67 | 0,0377 |
| 1458148_at   | Nlrc3     | NLR family, CARD domain containing 3                                | 1,67 | 0,0296 |
| 1435964_a_at | Taok3     | TAO kinase 3                                                        | 1,67 | 0,0041 |
| 1456250_x_at | Tgfb1     | transforming growth factor, beta induced                            | 1,66 | 0,0414 |
| 1437235_x_at | Lpp       | LIM domain containing preferred translocation partner in lipoma     | 1,66 | 0,0011 |



|              |           |                                                                                                   |      |        |
|--------------|-----------|---------------------------------------------------------------------------------------------------|------|--------|
| 1445499_at   | Zc3h13    | zinc finger CCCH type containing 13                                                               | 1,66 | 0,0168 |
| 1424609_a_at | 100039204 | predicted gene, 100039204                                                                         | 1,66 | 0,0048 |
| 1418427_at   | Kif5b     | kinesin family member 5B                                                                          | 1,66 | 0,0150 |
| 1442251_at   | Vcpip1    | valosin containing protein (p97)/p47 complex interacting protein 1                                | 1,66 | 0,0034 |
| 1448744_at   | Galns     | galactosamine (N-acetyl)-6-sulfate sulfatase                                                      | 1,66 | 0,0015 |
| 1437503_a_at | Shisa5    | shisa homolog 5 ( <i>Xenopus laevis</i> )                                                         | 1,66 | 0,0024 |
| 1420558_at   | Selp      | selectin, platelet                                                                                | 1,66 | 0,0256 |
| 1428967_at   | Igf1r     | insulin-like growth factor I receptor                                                             | 1,66 | 0,0184 |
| 1426938_at   | Nova1     | neuro-oncological ventral antigen 1                                                               | 1,66 | 0,0132 |
| 1444952_a_at | Nucks1    | nuclear casein kinase and cyclin-dependent kinase substrate 1                                     | 1,66 | 0,0041 |
| 1455377_at   | Tll17     | tubulin tyrosine ligase-like family, member 7                                                     | 1,66 | 0,0489 |
| 1449455_at   | Hck       | hemopoietic cell kinase                                                                           | 1,66 | 0,0005 |
| 1440878_at   | Runx1     | runt related transcription factor 1                                                               | 1,66 | 0,0004 |
| 1421045_at   | Mrc2      | mannose receptor, C type 2                                                                        | 1,66 | 0,0456 |
| 1424556_at   | Pycr1     | pyrroline-5-carboxylate reductase 1                                                               | 1,66 | 0,0069 |
| 1420411_a_at | Pi4k2b    | phosphatidylinositol 4-kinase type 2 beta                                                         | 1,66 | 0,0043 |
| 1423341_at   | Cspg4     | chondroitin sulfate proteoglycan 4                                                                | 1,66 | 0,0036 |
| 1421814_at   | Msn       | moesin                                                                                            | 1,66 | 0,0006 |
| 1423948_at   | Bag2      | BCL2-associated athanogene 2                                                                      | 1,65 | 0,0028 |
| 1434316_at   | Chsy1     | chondroitin sulfate synthase 1                                                                    | 1,65 | 0,0067 |
| 1450714_at   | Azin1     | antizyme inhibitor 1                                                                              | 1,65 | 0,0069 |
| 1454849_x_at | Clu       | clusterin                                                                                         | 1,65 | 0,0321 |
| 1428572_at   | Basp1     | brain abundant, membrane attached signal protein 1                                                | 1,65 | 0,0452 |
| 1441594_at   | NA        | NA                                                                                                | 1,65 | 0,0031 |
| 1434447_at   | Met       | met proto-oncogene                                                                                | 1,65 | 0,0007 |
| 1422638_s_at | Rassf5    | Ras association (RalGDS/AF-6) domain family member 5                                              | 1,65 | 0,0059 |
| 1416871_at   | Adam8     | a disintegrin and metallopeptidase domain 8                                                       | 1,65 | 0,0256 |
| 1424942_a_at | Myc       | myelocytomatosis oncogene                                                                         | 1,65 | 0,0497 |
| 1460695_a_at | Rik       | RIKEN cDNA 2010111101 gene                                                                        | 1,65 | 0,0222 |
| 1456772_at   | Ncf1      | neutrophil cytosolic factor 1                                                                     | 1,65 | 0,0032 |
| 1454551_at   | Rik       | RIKEN cDNA 9530034D02 gene                                                                        | 1,65 | 0,0101 |
| 1448748_at   | Plek      | pleckstrin                                                                                        | 1,65 | 0,0066 |
| 1444789_at   | NA        | NA                                                                                                | 1,65 | 0,0054 |
| 1457270_at   | Gas7      | growth arrest specific 7                                                                          | 1,65 | 0,0083 |
| 1460116_s_at | Spred1    | sprouty protein with EVH-1 domain 1, related sequence                                             | 1,64 | 0,0358 |
| 1418842_at   | Hcls1     | hematopoietic cell specific Lyn substrate 1                                                       | 1,64 | 0,0371 |
| 1437545_at   | Rcor1     | REST corepressor 1                                                                                | 1,64 | 0,0020 |
| 1440771_at   | Zkscan1   | zinc finger with KRAB and SCAN domains 1                                                          | 1,64 | 0,0096 |
| 1424208_at   | Ptger4    | prostaglandin E receptor 4 (subtype EP4)                                                          | 1,64 | 0,0152 |
| 1450984_at   | Tjp2      | tight junction protein 2                                                                          | 1,64 | 0,0002 |
| 1443160_at   | Sbf2      | SET binding factor 2                                                                              | 1,64 | 0,0414 |
| 1425687_at   | Cflar     | CASP8 and FADD-like apoptosis regulator protein kinase C and casein kinase substrate in neurons 1 | 1,64 | 0,0005 |
| 1449380_at   | Pacsin1   | neurons 1                                                                                         | 1,64 | 0,0020 |
| 1451533_at   | BC022687  | cDNA sequence BC022687                                                                            | 1,64 | 0,0264 |
| 1417870_x_at | Ctsz      | cathepsin Z                                                                                       | 1,64 | 0,0450 |
| 1438861_at   | Bnc2      | basonuclin 2                                                                                      | 1,64 | 0,0389 |
| 1425148_a_at | Snx6      | sorting nexin 6                                                                                   | 1,64 | 0,0001 |
| 1437759_at   | Pfkip     | phosphofructokinase, platelet                                                                     | 1,64 | 0,0054 |
| 1437544_at   | Fubp1     | far upstream element (FUSE) binding protein 1                                                     | 1,64 | 0,0074 |

|              |          |                                                                                                                               |      |        |
|--------------|----------|-------------------------------------------------------------------------------------------------------------------------------|------|--------|
| 1456262_at   | Rbm5     | RNA binding motif protein 5                                                                                                   | 1,64 | 0,0363 |
| 1458655_at   | NA       | NA                                                                                                                            | 1,64 | 0,0028 |
| 1456069_at   | Dtna     | dystrobrevin alpha                                                                                                            | 1,64 | 0,0154 |
| 1429831_at   | Pik3ap1  | phosphoinositide-3-kinase adaptor protein 1                                                                                   | 1,63 | 0,0192 |
| 1459791_at   | Dnajc1   | DnaJ (Hsp40) homolog, subfamily C, member 1                                                                                   | 1,63 | 0,0031 |
| 1451227_a_at | Slc10a3  | solute carrier family 10 (sodium/bile acid cotransporter family), member 3                                                    | 1,63 | 0,0025 |
| 1421228_at   | Ccl7     | chemokine (C-C motif) ligand 7                                                                                                | 1,63 | 0,0141 |
| 1428167_a_at | Mpzl1    | myelin protein zero-like 1                                                                                                    | 1,63 | 0,0077 |
| 1438401_at   | Ubn1     | ubiquitin 1                                                                                                                   | 1,63 | 0,0015 |
| 1426152_a_at | Kitl     | kit ligand                                                                                                                    | 1,63 | 0,0130 |
| 1418355_at   | Nucb2    | nucleobindin 2                                                                                                                | 1,63 | 0,0001 |
| 1436731_at   | Zfp385b  | zinc finger protein 385B                                                                                                      | 1,63 | 0,0026 |
| 1424349_a_at | Lpgat1   | lysophosphatidylglycerol acyltransferase 1                                                                                    | 1,63 | 0,0137 |
| 1418755_at   | Tbx15    | T-box 15                                                                                                                      | 1,63 | 0,0051 |
| 1450852_s_at | F2r      | coagulation factor II (thrombin) receptor                                                                                     | 1,63 | 0,0020 |
| 1423846_x_at | Tuba1b   | tubulin, alpha 1B                                                                                                             | 1,63 | 0,0026 |
| 1438407_at   | Dsel     | dermatan sulfate epimerase-like                                                                                               | 1,63 | 0,0066 |
| 1458315_at   | Epc1     | enhancer of polycomb homolog 1 (Drosophila)                                                                                   | 1,63 | 0,0353 |
| 1449298_a_at | Pde1a    | phosphodiesterase 1A, calmodulin-dependent                                                                                    | 1,63 | 0,0198 |
| 1417282_at   | Mmp23    | matrix metalloproteinase 23                                                                                                   | 1,63 | 0,0478 |
| 1452788_at   | Ppp2r5e  | protein phosphatase 2, regulatory subunit B (B56), epsilon isoform                                                            | 1,63 | 0,0425 |
| 1417961_a_at | Trim30   | tripartite motif-containing 30                                                                                                | 1,63 | 0,0420 |
| 1444194_at   | NA       | NA                                                                                                                            | 1,63 | 0,0095 |
| 1439205_at   | Nfatc2   | nuclear factor of activated T-cells, cytoplasmic, calcineurin-dependent 2                                                     | 1,62 | 0,0012 |
| 1436722_a_at | Actb     | actin, beta                                                                                                                   | 1,62 | 0,0059 |
| 1443768_at   | Rhoa     | ras homolog gene family, member A                                                                                             | 1,62 | 0,0064 |
| 1452016_at   | Alox5ap  | arachidonate 5-lipoxygenase activating protein                                                                                | 1,62 | 0,0036 |
| 1417143_at   | Lpar1    | lysophosphatidic acid receptor 1                                                                                              | 1,62 | 0,0045 |
| 1455324_at   | Plcx2    | phosphatidylinositol-specific phospholipase C, X domain containing 2                                                          | 1,62 | 0,0043 |
| 1425567_a_at | Anxa5    | annexin A5                                                                                                                    | 1,62 | 0,0078 |
| 1418729_at   | Star     | steroidogenic acute regulatory protein                                                                                        | 1,62 | 0,0002 |
| 1451667_at   | Fam20b   | family with sequence similarity 20, member B                                                                                  | 1,62 | 0,0059 |
| 1429321_at   | Rnf149   | ring finger protein 149                                                                                                       | 1,62 | 0,0006 |
| 1422555_s_at | Gna13    | guanine nucleotide binding protein, alpha 13                                                                                  | 1,62 | 0,0019 |
| 1417266_at   | Ccl6     | chemokine (C-C motif) ligand 6                                                                                                | 1,62 | 0,0150 |
| 1457402_at   | NA       | NA                                                                                                                            | 1,62 | 0,0293 |
| 1441063_at   | Eif2c3   | eukaryotic translation initiation factor 2C, 3                                                                                | 1,62 | 0,0010 |
| 1419585_at   | Rp2h     | retinitis pigmentosa 2 homolog (human)                                                                                        | 1,62 | 0,0082 |
| 1420946_at   | Atrx     | alpha thalassemia/mental retardation syndrome X-linked homolog (human)                                                        | 1,62 | 0,0128 |
| 1436025_at   | Ccdc88a  | coiled coil domain containing 88A                                                                                             | 1,62 | 0,0274 |
| 1448561_at   | Ncf2     | neutrophil cytosolic factor 2                                                                                                 | 1,62 | 0,0021 |
| 1443956_at   | Zfp397   | zinc finger protein 397                                                                                                       | 1,62 | 0,0045 |
| 1455287_at   | Cdk6     | cyclin-dependent kinase 6                                                                                                     | 1,61 | 0,0231 |
| 1438798_at   | Rik      | RIKEN cDNA 4931406P16 gene                                                                                                    | 1,61 | 0,0464 |
| 1447803_x_at | Capg     | capping protein (actin filament), gelsolin-like pleckstrin homology domain containing, family G (with RhoGef domain) member 1 | 1,61 | 0,0357 |
| 1440991_at   | Plekhg1  |                                                                                                                               | 1,61 | 0,0031 |
| 1419004_s_at | Bcl2a1a  | B-cell leukemia/lymphoma 2 related protein A1a                                                                                | 1,61 | 0,0015 |
| 1417084_at   | Eif4ebp2 | eukaryotic translation initiation factor 4E binding protein 2                                                                 | 1,61 | 0,0043 |
| 1416431_at   | Tubb6    | tubulin, beta 6                                                                                                               | 1,61 | 0,0323 |

|              |           |                                                                           |      |        |
|--------------|-----------|---------------------------------------------------------------------------|------|--------|
| 1437322_at   | Rbm4      | RNA binding motif protein 4                                               | 1,61 | 0,0135 |
| 1433971_at   | Camta1    | calmodulin binding transcription activator 1                              | 1,61 | 0,0297 |
| 1450637_a_at | Aebp1     | AE binding protein 1                                                      | 1,61 | 0,0079 |
| 1441137_at   | Bicc1     | bicaudal C homolog 1 (Drosophila)                                         | 1,61 | 0,0010 |
| 1450678_at   | Itgb2     | integrin beta 2                                                           | 1,61 | 0,0023 |
| 1452497_a_at | Nfatc3    | nuclear factor of activated T-cells, cytoplasmic, calcineurin-dependent 3 | 1,61 | 0,0113 |
| 1456145_at   | Dleu2     | deleted in lymphocytic leukemia, 2                                        | 1,60 | 0,0455 |
| 1418883_a_at | Pabpc1    | poly(A) binding protein, cytoplasmic 1                                    | 1,60 | 0,0035 |
| 1435241_at   | Heatr5a   | HEAT repeat containing 5A                                                 | 1,60 | 0,0340 |
| 1435929_at   | Rik       | RIKEN cDNA 9630033F20 gene                                                | 1,60 | 0,0181 |
| 1453172_at   | Hspa13    | heat shock protein 70 family, member 13                                   | 1,60 | 0,0087 |
| 1423790_at   | Dap       | death-associated protein                                                  | 1,60 | 0,0385 |
| 1439615_at   | Gan       | giant axonal neuropathy                                                   | 1,60 | 0,0102 |
| 1433857_at   | Fat1      | FAT tumor suppressor homolog 1 (Drosophila)                               | 1,60 | 0,0024 |
| 1448894_at   | Akr1b8    | aldo-keto reductase family 1, member B8                                   | 1,60 | 0,0021 |
| 1459266_at   | NA        | NA                                                                        | 1,60 | 0,0100 |
| 1437176_at   | Nlr5      | NLR family, CARD domain containing 5                                      | 1,60 | 0,0150 |
| 1422168_a_at | Bdnf      | brain derived neurotrophic factor                                         | 1,60 | 0,0078 |
| 1455732_at   | Rik       | RIKEN cDNA 2610510E02 gene                                                | 1,60 | 0,0031 |
| 1457488_at   | 5Rik      | RIKEN cDNA B230339M05 gene                                                | 1,60 | 0,0057 |
| 1449839_at   | Casp3     | caspase 3                                                                 | 1,60 | 0,0384 |
| 1439196_at   | Hook3     | hook homolog 3 (Drosophila)                                               | 1,59 | 0,0004 |
| 1426301_at   | Alcam     | activated leukocyte cell adhesion molecule                                | 1,59 | 0,0308 |
| 1460220_a_at | Csf1      | colony stimulating factor 1 (macrophage)                                  | 1,59 | 0,0355 |
| 1420842_at   | Ptprf     | protein tyrosine phosphatase, receptor type, F                            | 1,59 | 0,0118 |
| 1460188_at   | Ptpn6     | protein tyrosine phosphatase, non-receptor type 6                         | 1,59 | 0,0084 |
| 1421545_a_at | Syne1     | synaptic nuclear envelope 1                                               | 1,59 | 0,0150 |
| 1455869_at   | NA        | NA                                                                        | 1,59 | 0,0188 |
| 1420731_a_at | Csrp2     | cysteine and glycine-rich protein 2                                       | 1,59 | 0,0360 |
| 1424893_at   | Ndel1     | nuclear distribution gene E-like homolog 1 (A. nidulans)                  | 1,59 | 0,0500 |
| 1433761_at   | Pde4dip   | phosphodiesterase 4D interacting protein (myomegalin)                     | 1,59 | 0,0023 |
| 1433536_at   | Lrp11     | low density lipoprotein receptor-related protein 11                       | 1,59 | 0,0177 |
| 1423805_at   | Dab2      | disabled homolog 2 (Drosophila)                                           | 1,59 | 0,0243 |
| 1447851_x_at | Atp10a    | ATPase, class V, type 10A                                                 | 1,59 | 0,0203 |
| 1448967_at   | Nipsnap3a | nipsnap homolog 3A (C. elegans)                                           | 1,59 | 0,0197 |
| 1448931_at   | F2r1l     | coagulation factor II (thrombin) receptor-like 1                          | 1,59 | 0,0038 |
| 1426260_a_at | Ugt1a6a   | UDP glucuronosyltransferase 1 family, polypeptide A6A                     | 1,59 | 0,0405 |
| 1437872_at   | Napepld   | N-acyl phosphatidylethanolamine phospholipase D                           | 1,59 | 0,0440 |
| 1434674_at   | Lyst      | lysosomal trafficking regulator                                           | 1,59 | 0,0177 |
| 1445850_at   | Ppp1r12b  | protein phosphatase 1, regulatory (inhibitor) subunit 12B                 | 1,59 | 0,0146 |
| 1437884_at   | Arl5b     | ADP-ribosylation factor-like 5B                                           | 1,59 | 0,0437 |
| 1456357_at   | Rik       | RIKEN cDNA A930041I02 gene                                                | 1,58 | 0,0013 |
| 1451734_a_at | Dbn1      | drebrin 1                                                                 | 1,58 | 0,0454 |
| 1460567_at   | Rfx7      | regulatory factor X, 7                                                    | 1,58 | 0,0083 |
| 1453586_at   | Entpd1    | ectonucleoside triphosphate diphosphohydrolase 1                          | 1,58 | 0,0264 |
| 1450629_at   | Lima1     | LIM domain and actin binding 1                                            | 1,58 | 0,0220 |
| 1420843_at   | Ptprf     | protein tyrosine phosphatase, receptor type, F                            | 1,58 | 0,0145 |
| 1420697_at   | Slc15a3   | solute carrier family 15, member 3                                        | 1,58 | 0,0173 |

|              |            |                                                             |      |        |
|--------------|------------|-------------------------------------------------------------|------|--------|
| 1415826_at   | Atp6v1h    | ATPase, H <sup>+</sup> transporting, lysosomal V1 subunit H | 1,58 | 0,0013 |
| 1426540_at   | Endod1     | endonuclease domain containing 1                            | 1,58 | 0,0040 |
| 1456586_x_at | Mvp        | major vault protein                                         | 1,58 | 0,0039 |
| 1441389_at   | NA         | NA                                                          | 1,58 | 0,0320 |
| 1449591_at   | Casp4      | caspase 4, apoptosis-related cysteine peptidase             | 1,58 | 0,0057 |
| 1424343_a_at | Eif1a      | eukaryotic translation initiation factor 1A                 | 1,58 | 0,0028 |
| 1422062_at   | Msr1       | macrophage scavenger receptor 1                             | 1,58 | 0,0082 |
| 1417128_at   | Plekho1    | pleckstrin homology domain containing, family O member 1    | 1,58 | 0,0006 |
| 1427986_a_at | Col16a1    | collagen, type XVI, alpha 1                                 | 1,58 | 0,0497 |
| 1444456_at   | Rik        | RIKEN cDNA 9030425P06 gene                                  | 1,58 | 0,0238 |
| 1426350_at   | Mgat2      | mannoside acetylglucosaminyltransferase 2                   | 1,58 | 0,0152 |
| 1446906_at   | C81615     | expressed sequence C81615                                   | 1,58 | 0,0118 |
| 1434418_at   | Lass6      | LAG1 homolog, ceramide synthase 6                           | 1,57 | 0,0216 |
| 1431320_a_at | Myo5a      | myosin VA                                                   | 1,57 | 0,0030 |
| 1453427_at   | Csnk2a1    | casein kinase 2, alpha 1 polypeptide                        | 1,57 | 0,0146 |
| 1447824_x_at | Hspa5      | heat shock protein 5                                        | 1,57 | 0,0363 |
| 1418035_a_at | Prim2      | DNA primase, p58 subunit                                    | 1,57 | 0,0272 |
| 1456983_at   | NA         | NA                                                          | 1,57 | 0,0038 |
| 1447649_x_at | Dnajc1     | DnaJ (Hsp40) homolog, subfamily C, member 1                 | 1,57 | 0,0118 |
| 1459571_at   | NA         | NA                                                          | 1,57 | 0,0018 |
| 1457398_at   | NA         | NA                                                          | 1,57 | 0,0049 |
| 1456310_a_at | Rik        | RIKEN cDNA 2610002J02 gene                                  | 1,57 | 0,0151 |
| 1440708_at   | Myh9       | myosin, heavy polypeptide 9, non-muscle                     | 1,57 | 0,0253 |
| 1423306_at   | Rik        | RIKEN cDNA 2010002N04 gene                                  | 1,57 | 0,0083 |
| 1418340_at   | Fcer1g     | Fc receptor, IgE, high affinity I, gamma polypeptide        | 1,57 | 0,0151 |
| 1436530_at   | 0000000971 | predicted gene, OTTMUSG00000000971                          | 1,57 | 0,0186 |
| 1439108_at   | Mll5       | myeloid/lymphoid or mixed-lineage leukemia 5                | 1,57 | 0,0130 |
| 1444507_at   | Usp53      | ubiquitin specific peptidase 53                             | 1,57 | 0,0447 |
| 1450904_at   | Tmem167    | transmembrane protein 167                                   | 1,57 | 0,0073 |
| 1450234_at   | Ms4a6c     | membrane-spanning 4-domains, subfamily A, member 6C         | 1,57 | 0,0380 |
| 1452082_at   | 8Rik       | RIKEN cDNA 6430548M08 gene                                  | 1,57 | 0,0017 |
| 1450924_at   | Hdgfrp3    | hepatoma-derived growth factor, related protein 3           | 1,56 | 0,0354 |
| 1449117_at   | Jund       | Jun proto-oncogene related gene d                           | 1,56 | 0,0041 |
| 1454607_s_at | Psat1      | phosphoserine aminotransferase 1                            | 1,56 | 0,0480 |
| 1418824_at   | Arf6       | ADP-ribosylation factor 6                                   | 1,56 | 0,0349 |
| 1449270_at   | Plxdc2     | plexin domain containing 2                                  | 1,56 | 0,0437 |
| 1457022_at   | NA         | NA                                                          | 1,56 | 0,0011 |
| 1428418_s_at | Fam164a    | family with sequence similarity 164, member A               | 1,56 | 0,0041 |
| 1428497_at   | Secisbp2   | SECIS binding protein 2                                     | 1,56 | 0,0056 |
| 1449874_at   | Ly96       | lymphocyte antigen 96                                       | 1,56 | 0,0181 |
| 1423331_a_at | Pvr13      | poliovirus receptor-related 3                               | 1,56 | 0,0411 |
| 1428197_at   | Tspan9     | tetraspanin 9                                               | 1,56 | 0,0267 |
| 1427357_at   | Cda        | cytidine deaminase                                          | 1,56 | 0,0233 |
| 1455049_at   | Igsf3      | immunoglobulin superfamily, member 3                        | 1,56 | 0,0018 |
| 1435331_at   | Pyhin1     | pyrin and HIN domain family, member 1                       | 1,56 | 0,0014 |
| 1435284_at   | Rtn4       | reticulon 4                                                 | 1,56 | 0,0253 |
| 1421408_at   | Igsf6      | immunoglobulin superfamily, member 6                        | 1,56 | 0,0159 |
| 1429120_at   | Lnp        | limb and neural patterns                                    | 1,56 | 0,0324 |
| 1424657_at   | Taok1      | TAO kinase 1                                                | 1,56 | 0,0230 |

|                           |            |                                                                                               |      |        |
|---------------------------|------------|-----------------------------------------------------------------------------------------------|------|--------|
| 1457455_at                | Suhw4      | suppressor of hairy wing homolog 4 (Drosophila)                                               | 1,56 | 0,0187 |
| 1429178_at                | Odz3       | odd Oz/ten-m homolog 3 (Drosophila)                                                           | 1,56 | 0,0081 |
| 1423885_at                | Lamc1      | laminin, gamma 1                                                                              | 1,56 | 0,0241 |
| 1435748_at                | Gda        | guanine deaminase                                                                             | 1,55 | 0,0066 |
| 1445337_at                | Dnajc13    | DnaJ (Hsp40) homolog, subfamily C, member 13                                                  | 1,55 | 0,0197 |
| 1439455_x_at              | Capza1     | capping protein (actin filament) muscle Z-line, alpha 1                                       | 1,55 | 0,0401 |
| 1429768_at                | Dtna       | dystrobrevin alpha                                                                            | 1,55 | 0,0045 |
| 1420259_at                | Pkp2       | plakophilin 2                                                                                 | 1,55 | 0,0100 |
| 1441930_x_at              | Vat1       | vesicle amine transport protein 1 homolog (T californica)                                     | 1,55 | 0,0025 |
| 1442233_at                | NA         | NA                                                                                            | 1,55 | 0,0211 |
| 1422831_at                | Fbn2       | fibrillin 2                                                                                   | 1,55 | 0,0371 |
| 1419161_a_at              | Nox4       | NADPH oxidase 4                                                                               | 1,55 | 0,0070 |
| 1426025_s_at              | Laptm5     | lysosomal-associated protein transmembrane 5                                                  | 1,55 | 0,0151 |
| 1450734_at                | Sec16b     | SEC16 homolog B (S. cerevisiae)                                                               | 1,55 | 0,0253 |
| 1419132_at                | Tlr2       | toll-like receptor 2                                                                          | 1,55 | 0,0009 |
| 1429521_at                | Alkbh8     | alkB, alkylation repair homolog 8 (E. coli)                                                   | 1,55 | 0,0208 |
| 1450047_at                | Hs6st2     | heparan sulfate 6-O-sulfotransferase 2                                                        | 1,55 | 0,0026 |
| 1418809_at                | Pira1      | paired-Ig-like receptor A1                                                                    | 1,55 | 0,0158 |
| 1439109_at                | Ccdc68     | coiled-coil domain containing 68                                                              | 1,55 | 0,0011 |
| 1457534_at                | NA         | NA                                                                                            | 1,55 | 0,0340 |
| 1435749_at                | Gda        | guanine deaminase                                                                             | 1,55 | 0,0119 |
|                           | LOC100042  |                                                                                               |      |        |
| 1455160_at                | 464        | hypothetical protein LOC100042464                                                             | 1,54 | 0,0487 |
| 1422875_at                | Cd84       | CD84 antigen                                                                                  | 1,54 | 0,0029 |
| 1453550_a_at              | Far1       | fatty acyl CoA reductase 1                                                                    | 1,54 | 0,0243 |
| 1435472_at                | Kremen1    | kringle containing transmembrane protein 1                                                    | 1,54 | 0,0151 |
| 1431834_a_at              | Emilin1    | elastin microfibril interfacier 1                                                             | 1,54 | 0,0281 |
| 1441756_at                | NA         | NA                                                                                            | 1,54 | 0,0187 |
| 1441994_at                | Pcdhb16    | protocadherin beta 16                                                                         | 1,54 | 0,0101 |
| 1434186_at                | Lpar4      | lysophosphatidic acid receptor 4                                                              | 1,54 | 0,0449 |
| 1430404_at                | Akap13     | A kinase (PRKA) anchor protein 13                                                             | 1,54 | 0,0349 |
| 1451065_a_at              | Ddx39      | DEAD (Asp-Glu-Ala-Asp) box polypeptide 39                                                     | 1,54 | 0,0314 |
| 1447602_x_at              | Sulf2      | sulfatase 2                                                                                   | 1,54 | 0,0033 |
| 1421075_s_at              | Cyp7b1     | cytochrome P450, family 7, subfamily b, polypeptide 1                                         | 1,54 | 0,0045 |
| 1429093_at                | Ddi2       | DNA-damage inducible protein 2                                                                | 1,54 | 0,0323 |
| 1421073_a_at              | Ptger4     | prostaglandin E receptor 4 (subtype EP4)                                                      | 1,54 | 0,0192 |
|                           | A530047J11 |                                                                                               |      |        |
| 1440884_s_at              | Rik        | RIKEN cDNA A530047J11 gene                                                                    | 1,54 | 0,0197 |
| 1422620_s_at              | Ppap2a     | phosphatidic acid phosphatase type 2A                                                         | 1,54 | 0,0105 |
| 1448545_at                | Sdc2       | syndecan 2                                                                                    | 1,54 | 0,0291 |
| 1416303_at                | Litaf      | LPS-induced TN factor                                                                         | 1,54 | 0,0427 |
| 1444411_at                | NA         | NA                                                                                            | 1,54 | 0,0274 |
| 1428228_at                | Pgm3       | phosphoglucomutase 3                                                                          | 1,54 | 0,0403 |
| 1448660_at                | Arhgdig    | Rho GDP dissociation inhibitor (GDI) gamma avian musculoaponeurotic fibrosarcoma (v-maf) AS42 | 1,54 | 0,0013 |
| 1447849_s_at              | Maf        | oncogene homolog                                                                              | 1,54 | 0,0236 |
| 1437451_at                | Ecscr      | endothelial cell-specific chemotaxis regulator                                                | 1,54 | 0,0152 |
| AFFX-b-<br>ActinMur/M1248 |            |                                                                                               |      |        |
| 1_3_at                    | Actb       | actin, beta                                                                                   | 1,53 | 0,0083 |
| 1431057_a_at              | Prss23     | protease, serine, 23                                                                          | 1,53 | 0,0039 |
| 1438807_at                | Hnrnpr     | heterogeneous nuclear ribonucleoprotein R                                                     | 1,53 | 0,0158 |
| 1428069_at                | Cdca7      | cell division cycle associated 7                                                              | 1,53 | 0,0171 |
| 1420819_at                | Sla        | src-like adaptor                                                                              | 1,53 | 0,0184 |

|              |                     |                                                                                               |      |        |
|--------------|---------------------|-----------------------------------------------------------------------------------------------|------|--------|
| 1436222_at   | Gas5                | growth arrest specific 5                                                                      | 1,53 | 0,0130 |
| 1460069_at   | Smc6                | structural maintenance of chromosomes 6                                                       | 1,53 | 0,0048 |
| 1442109_at   | NA                  | NA                                                                                            | 1,53 | 0,0186 |
| 1435476_a_at | Fcgr2b              | Fc receptor, IgG, low affinity IIb                                                            | 1,53 | 0,0007 |
| 1431127_at   | Zbtb43              | zinc finger and BTB domain containing 43                                                      | 1,53 | 0,0034 |
| 1452424_at   | Lpar4               | lysophosphatidic acid receptor 4                                                              | 1,53 | 0,0257 |
| 1460419_a_at | Prkcb               | protein kinase C, beta                                                                        | 1,53 | 0,0435 |
| 1450841_at   | Stt3a<br>5930405F01 | STT3, subunit of the oligosaccharyltransferase complex, homolog A (S. cerevisiae)             | 1,53 | 0,0042 |
| 1441372_at   | Rik<br>2010111I01   | RIKEN cDNA 5930405F01 gene                                                                    | 1,53 | 0,0138 |
| 1435089_at   | Rik                 | RIKEN cDNA 2010111I01 gene                                                                    | 1,53 | 0,0100 |
| 1437820_at   | Foxs1               | forkhead box S1                                                                               | 1,53 | 0,0243 |
| 1455998_at   | LOC667118           | similar to Zinc finger BED domain containing protein 4                                        | 1,53 | 0,0226 |
| 1426784_at   | Trim47              | tripartite motif-containing 47                                                                | 1,53 | 0,0413 |
| 1448452_at   | Irf8                | interferon regulatory factor 8                                                                | 1,53 | 0,0096 |
| 1426397_at   | Tgfr2               | transforming growth factor, beta receptor II                                                  | 1,53 | 0,0002 |
| 1455824_x_at | Stt3a               | STT3, subunit of the oligosaccharyltransferase complex, homolog A (S. cerevisiae)             | 1,52 | 0,0085 |
| 1424603_at   | Sumf1               | sulfatase modifying factor 1                                                                  | 1,52 | 0,0313 |
| 1423274_at   | Serpine3            | serpin peptidase inhibitor, clade E (nexin, plasminogen activator inhibitor type 1), member 3 | 1,52 | 0,0470 |
| 1440553_at   | Mecr                | mitochondrial trans-2-enoyl-CoA reductase                                                     | 1,52 | 0,0101 |
| 1415951_at   | Fkbp10              | FK506 binding protein 10                                                                      | 1,52 | 0,0043 |
| 1449414_at   | Zfp53               | zinc finger protein 53                                                                        | 1,52 | 0,0409 |
| 1423693_at   | Ela1                | elastase 1, pancreatic                                                                        | 1,52 | 0,0044 |
| 1452982_at   | Igf1r               | insulin-like growth factor I receptor                                                         | 1,52 | 0,0454 |
| 1457294_at   | Tmtc3               | transmembrane and tetratricopeptide repeat containing 3                                       | 1,52 | 0,0055 |
| 1451680_at   | Srxn1               | sulfiredoxin 1 homolog (S. cerevisiae)                                                        | 1,52 | 0,0440 |
| 1456686_at   | NA                  | NA                                                                                            | 1,52 | 0,0033 |
| 1441653_at   | Srcap               | Snf2-related CREBBP activator protein                                                         | 1,52 | 0,0145 |
| 1447176_at   | NA                  | NA                                                                                            | 1,52 | 0,0394 |
| 1433759_at   | Dpy19l1             | dpy-19-like 1 (C. elegans)                                                                    | 1,52 | 0,0160 |
| 1446324_at   | NA                  | NA                                                                                            | 1,52 | 0,0051 |
| 1431420_s_at | Preli1              | PRELI domain containing 1                                                                     | 1,52 | 0,0281 |
| 1423326_at   | Entpd1              | ectonucleoside triphosphate diphosphohydrolase 1                                              | 1,52 | 0,0386 |
| 1438721_a_at | Irf3                | interferon regulatory factor 3                                                                | 1,52 | 0,0162 |
| 1434600_at   | Tjp2                | tight junction protein 2                                                                      | 1,52 | 0,0040 |
| 1416808_at   | Nid1                | nidogen 1                                                                                     | 1,52 | 0,0283 |
| 1455314_at   | Lpp                 | LIM domain containing preferred translocation partner in lipoma                               | 1,52 | 0,0161 |
| 1428176_at   | S1pr2               | sphingosine-1-phosphate receptor 2                                                            | 1,52 | 0,0158 |
| 1440776_at   | Limch1              | LIM and calponin homology domains 1                                                           | 1,52 | 0,0046 |
| 1455350_at   | Tmem62              | transmembrane protein 62                                                                      | 1,52 | 0,0144 |
| 1427539_a_at | Zwint               | ZW10 interactor                                                                               | 1,52 | 0,0204 |
| 1459237_at   | NA                  | NA                                                                                            | 1,52 | 0,0225 |
| 1449297_at   | Casp12              | caspase 12                                                                                    | 1,52 | 0,0195 |
| 1427537_at   | Eppk1               | epiplakin 1                                                                                   | 1,52 | 0,0291 |
| 1444431_at   | Rcsd1               | RCSD domain containing 1                                                                      | 1,51 | 0,0317 |
| 1437278_a_at | Uba2                | ubiquitin-like modifier activating enzyme 2                                                   | 1,51 | 0,0012 |
| 1440790_x_at | NA                  | NA                                                                                            | 1,51 | 0,0152 |
| 1433617_s_at | B4galt5             | UDP-Gal:betaGlcNAc beta 1,4-galactosyltransferase, polypeptide 5                              | 1,51 | 0,0031 |
| 1442659_at   | Pcdh9               | protocadherin 9                                                                               | 1,51 | 0,0225 |
| 1441683_at   | NA                  | NA                                                                                            | 1,51 | 0,0173 |

|              |            |                                                          |      |        |
|--------------|------------|----------------------------------------------------------|------|--------|
| 1458496_at   | NA         | NA                                                       | 1,51 | 0,0429 |
|              | 4930428B01 |                                                          |      |        |
| 1430516_at   | Rik        | RIKEN cDNA 4930428B01 gene                               | 1,51 | 0,0132 |
| 1450985_a_at | Tjp2       | tight junction protein 2                                 | 1,51 | 0,0010 |
| 1435588_at   | Wdfy1      | WD repeat and FYVE domain containing 1                   | 1,51 | 0,0066 |
| 1455814_x_at | Ddx39      | DEAD (Asp-Glu-Ala-Asp) box polypeptide 39                | 1,51 | 0,0082 |
| 1418245_a_at | Rbm9       | RNA binding motif protein 9                              | 1,51 | 0,0149 |
| 1417400_at   | Rai14      | retinoic acid induced 14                                 | 1,51 | 0,0249 |
| 1420979_at   | Pak1       | p21 (CDKN1A)-activated kinase 1                          | 1,51 | 0,0035 |
| 1417136_s_at | Srpk2      | serine/arginine-rich protein specific kinase 2           | 1,51 | 0,0111 |
|              |            | inositol 1,4,5-triphosphate receptor interacting         |      |        |
|              |            | protein-like 2                                           |      |        |
| 1435777_at   | Itrip12    |                                                          | 1,51 | 0,0378 |
| 1429327_at   | Sdccag1    | serologically defined colon cancer antigen 1             | 1,51 | 0,0093 |
| 1417248_at   | Ralbp1     | ralA binding protein 1                                   | 1,51 | 0,0281 |
| 1431405_a_at | Cspp1      | centrosome and spindle pole associated protein 1         | 1,51 | 0,0394 |
|              |            | xylosylprotein beta1,4-galactosyltransferase,            |      |        |
|              |            | polypeptide 7 (galactosyltransferase I)                  |      |        |
| 1426304_x_at | B4galt7    |                                                          | 1,51 | 0,0425 |
| 1424442_a_at | Pja2       | praja 2, RING-H2 motif containing                        | 1,51 | 0,0152 |
| 1454120_a_at | Pcgf6      | polycomb group ring finger 6                             | 1,51 | 0,0149 |
| 1416811_s_at | Ctla2a     | cytotoxic T lymphocyte-associated protein 2 alpha        | 1,51 | 0,0054 |
| 1425241_a_at | Wsb1       | WD repeat and SOCS box-containing 1                      | 1,51 | 0,0306 |
| 1425556_at   | Crks       | CDC2-related kinase, arginine/serine-rich                | 1,51 | 0,0104 |
| 1438242_at   | Usp40      | ubiquitin specific peptidase 40                          | 1,51 | 0,0469 |
| 1423829_at   | Fam49b     | family with sequence similarity 49, member B             | 1,50 | 0,0009 |
|              | A930041I02 |                                                          |      |        |
| 1435266_at   | Rik        | RIKEN cDNA A930041I02 gene                               | 1,50 | 0,0123 |
| 1460600_at   | AA414768   | expressed sequence AA414768                              | 1,50 | 0,0034 |
| 1448123_s_at | Tgfb1      | transforming growth factor, beta induced                 | 1,50 | 0,0468 |
| 1424749_at   | Wdfy1      | WD repeat and FYVE domain containing 1                   | 1,50 | 0,0497 |
| 1447903_x_at | Ap1s2      | adaptor-related protein complex 1, sigma 2 subunit       | 1,50 | 0,0176 |
| 1454788_at   | Arl4c      | ADP-ribosylation factor-like 4C                          | 1,50 | 0,0161 |
| 1421186_at   | Ccr2       | chemokine (C-C motif) receptor 2                         | 1,50 | 0,0009 |
| 1460247_a_at | Skp2       | S-phase kinase-associated protein 2 (p45)                | 1,50 | 0,0199 |
| 1443491_at   | NA         | NA                                                       | 1,50 | 0,0202 |
| 1429433_at   | Bat2d      | BAT2 domain containing 1                                 | 1,50 | 0,0244 |
|              | 6430510B20 |                                                          |      |        |
| 1459283_at   | Rik        | RIKEN cDNA 6430510B20 gene                               | 1,50 | 0,0424 |
|              |            | epidermal growth factor receptor pathway substrate       |      |        |
|              |            | 15                                                       |      |        |
| 1430152_at   | Eps15      |                                                          | 1,50 | 0,0028 |
|              | ENSMUSG0   |                                                          |      |        |
| 1440290_at   | 0000056771 | predicted gene, ENSMUSG0000056771                        | 1,50 | 0,0296 |
|              |            | LIM domain containing preferred translocation partner    |      |        |
|              |            | in lipoma                                                |      |        |
| 1425673_at   | Lpp        |                                                          | 1,50 | 0,0057 |
|              |            | LIM domain containing preferred translocation partner    |      |        |
|              |            | in lipoma                                                |      |        |
| 1454899_at   | Lpp        |                                                          | 1,50 | 0,0151 |
|              | 2610029G2  |                                                          |      |        |
| 1417921_at   | 3Rik       | RIKEN cDNA 2610029G23 gene                               | 1,50 | 0,0023 |
| 1439440_x_at | Twf2       | twinfilin, actin-binding protein, homolog 2 (Drosophila) | 1,50 | 0,0183 |
| 1436336_at   | Pthr1      | peptidyl-tRNA hydrolase 1 homolog (S. cerevisiae)        | 1,50 | 0,0017 |
|              |            | mitogen-activated protein kinase kinase kinase           |      |        |
| 1446798_at   | Map4k3     | kinase 3                                                 | 1,50 | 0,0383 |
| 1444337_at   | NA         | NA                                                       | 1,50 | 0,0162 |
| 1444279_at   | Huwe1      | HECT, UBA and WWE domain containing 1                    | 1,50 | 0,0331 |
| 1422730_at   | Limd1      | LIM domains containing 1                                 | 1,50 | 0,0428 |
| 1417028_a_at | Trim2      | tripartite motif-containing 2                            | 1,50 | 0,0417 |
| 1446518_at   | NA         | NA                                                       | 1,50 | 0,0264 |
| 1438151_x_at | Zdhhc14    | zinc finger, DHHC domain containing 14                   | 1,50 | 0,0041 |

|              |            |                                                                                                                          |      |        |
|--------------|------------|--------------------------------------------------------------------------------------------------------------------------|------|--------|
| 1451715_at   | Mafb       | v-maf musculoaponeurotic fibrosarcoma oncogene family, protein B (avian)                                                 | 1,50 | 0,0177 |
| 1448199_at   | Ankrd10    | ankyrin repeat domain 10                                                                                                 | 1,50 | 0,0007 |
| 1422637_at   | Rassf5     | Ras association (RalGDS/AF-6) domain family member 5                                                                     | 1,50 | 0,0072 |
| 1448129_at   | Arpc5      | actin related protein 2/3 complex, subunit 5                                                                             | 1,50 | 0,0040 |
| 1431339_a_at | Efhd2      | EF hand domain containing 2                                                                                              | 1,50 | 0,0283 |
| 1418718_at   | Cxcl16     | chemokine (C-X-C motif) ligand 16                                                                                        | 1,49 | 0,0075 |
| 1434232_a_at | Rik        | 2610030H06<br>RIKEN cDNA 2610030H06 gene                                                                                 | 1,49 | 0,0378 |
| 1438212_at   | Usp37      | ubiquitin specific peptidase 37                                                                                          | 1,49 | 0,0086 |
| 1455992_at   | Vgll4      | vestigial like 4 (Drosophila)                                                                                            | 1,49 | 0,0324 |
| 1425548_a_at | Lst1       | leukocyte specific transcript 1                                                                                          | 1,49 | 0,0086 |
| 1454158_at   | Mpp7       | membrane protein, palmitoylated 7 (MAGUK p55 subfamily member 7)                                                         | 1,49 | 0,0328 |
| 1418562_at   | Sf3b1      | splicing factor 3b, subunit 1                                                                                            | 1,49 | 0,0101 |
| 1457658_x_at | Anxa4      | annexin A4                                                                                                               | 1,49 | 0,0289 |
| 1440975_at   | Mxra7      | matrix-remodelling associated 7                                                                                          | 1,49 | 0,0075 |
| 1448618_at   | Mvp        | major vault protein                                                                                                      | 1,49 | 0,0086 |
| 1420988_at   | Polh       | polymerase (DNA directed), eta (RAD 30 related)                                                                          | 1,49 | 0,0204 |
| 1459766_x_at | Sf1        | splicing factor 1                                                                                                        | 1,49 | 0,0291 |
| 1438426_at   | Shisa4     | shisa homolog 4 (Xenopus laevis)                                                                                         | 1,49 | 0,0109 |
| 1418778_at   | Ccdc109b   | coiled-coil domain containing 109B<br>UDP-N-acetyl-alpha-D-galactosamine:polypeptide N-acetylgalactosaminyltransferase 4 | 1,49 | 0,0198 |
| 1455915_at   | Galnt4     | quiescin Q6 sulfhydryl oxidase 1                                                                                         | 1,49 | 0,0330 |
| 1420832_at   | Qsox1      | colony stimulating factor 2 receptor, beta 2, low-affinity (granulocyte-macrophage)                                      | 1,49 | 0,0002 |
| 1449360_at   | Csf2rb2    | latent transforming growth factor beta binding protein 3                                                                 | 1,49 | 0,0020 |
| 1418049_at   | Ltbp3      | 3                                                                                                                        | 1,49 | 0,0343 |
| 1439953_at   | Pmm2       | phosphomannomutase 2                                                                                                     | 1,49 | 0,0450 |
| 1433623_at   | Zfp367     | zinc finger protein 367                                                                                                  | 1,49 | 0,0150 |
| 1457484_at   | D930050J11 | hypothetical D930050J11                                                                                                  | 1,49 | 0,0110 |
| 1444481_at   | NA         | NA                                                                                                                       | 1,49 | 0,0054 |
| 1426168_a_at | Tcra       | T-cell receptor alpha chain                                                                                              | 1,49 | 0,0159 |
| 1441081_a_at | Rik        | 1110038B12<br>RIKEN cDNA 1110038B12 gene                                                                                 | 1,49 | 0,0346 |
| 1429019_s_at | Pon2       | paraoxonase 2                                                                                                            | 1,49 | 0,0345 |
| 1421366_at   | Clec5a     | C-type lectin domain family 5, member a                                                                                  | 1,49 | 0,0440 |
| 1449027_at   | Rhou       | ras homolog gene family, member U                                                                                        | 1,49 | 0,0111 |
| 1460084_at   | NA         | NA                                                                                                                       | 1,49 | 0,0071 |
| 1437000_at   | Dgkq       | diacylglycerol kinase, theta                                                                                             | 1,48 | 0,0321 |
| 1420860_at   | Itga9      | integrin alpha 9                                                                                                         | 1,48 | 0,0057 |
| 1437862_at   | Rbm25      | RNA binding motif protein 25                                                                                             | 1,48 | 0,0136 |
| 1458637_x_at | NA         | NA                                                                                                                       | 1,48 | 0,0088 |
| 1422139_at   | Plau       | plasminogen activator, urokinase                                                                                         | 1,48 | 0,0201 |
| 1441129_at   | NA         | NA                                                                                                                       | 1,48 | 0,0323 |
| 1434998_at   | Iqgap1     | IQ motif containing GTPase activating protein 1                                                                          | 1,48 | 0,0033 |
| 1427418_a_at | Hif1a      | hypoxia inducible factor 1, alpha subunit                                                                                | 1,48 | 0,0021 |
| 1448667_x_at | Tob2       | transducer of ERBB2, 2                                                                                                   | 1,48 | 0,0411 |
| 1454422_at   | Rik        | 4930456J16<br>RIKEN cDNA 4930456J16 gene                                                                                 | 1,48 | 0,0081 |
| 1436181_at   | Ddef2      | development and differentiation enhancing factor 2                                                                       | 1,48 | 0,0407 |
| 1448299_at   | Slc1a1     | solute carrier family 1 (neuronal/epithelial high affinity glutamate transporter, system Xag), member 1                  | 1,48 | 0,0329 |
| 1438429_at   | Rik        | 2610319H10<br>RIKEN cDNA 2610319H10 gene                                                                                 | 1,48 | 0,0029 |



|              |           |                                                                                                   |      |        |
|--------------|-----------|---------------------------------------------------------------------------------------------------|------|--------|
| 1416554_at   | Pdlim1    | PDZ and LIM domain 1 (elfin)                                                                      | 1,48 | 0,0257 |
| 1422219_a_at | Tbx20     | T-box 20                                                                                          | 1,48 | 0,0168 |
| 1426300_at   | Alcam     | activated leukocyte cell adhesion molecule                                                        | 1,48 | 0,0038 |
| 1435938_at   | Ckap2l    | cytoskeleton associated protein 2-like                                                            | 1,48 | 0,0447 |
| 1424483_at   | Mobkl1b   | MOB1, Mps One Binder kinase activator-like 1B (yeast)                                             | 1,48 | 0,0351 |
| 1423886_at   | Lamc1     | laminin, gamma 1                                                                                  | 1,48 | 0,0142 |
| 1418261_at   | Syk       | spleen tyrosine kinase                                                                            | 1,48 | 0,0028 |
| 1439887_at   | NA        | NA                                                                                                | 1,48 | 0,0380 |
| 1438168_x_at | Ddx39     | DEAD (Asp-Glu-Ala-Asp) box polypeptide 39                                                         | 1,48 | 0,0066 |
| 1434942_at   | Esf1      | ESF1, nucleolar pre-rRNA processing protein, homolog (S. cerevisiae)                              | 1,48 | 0,0043 |
| 1430521_s_at | Cpne8     | copine VIII                                                                                       | 1,48 | 0,0256 |
| 1441986_at   | Zcchc6    | zinc finger, CCHC domain containing 6                                                             | 1,47 | 0,0110 |
| 1424755_at   | Hip1      | huntingtin interacting protein 1                                                                  | 1,47 | 0,0051 |
| 1425315_at   | Dock7     | dedicator of cytokinesis 7                                                                        | 1,47 | 0,0021 |
| 1456420_at   | Arid4a    | AT rich interactive domain 4A (RBP1-like)                                                         | 1,47 | 0,0188 |
| 1437907_a_at | Tbca      | tubulin cofactor A                                                                                | 1,47 | 0,0072 |
| 1458370_at   | Bmp2k     | BMP2 inducible kinase                                                                             | 1,47 | 0,0079 |
| 1429883_at   | Actl6a    | actin-like 6A                                                                                     | 1,47 | 0,0156 |
| 1452108_at   | Igf1r     | insulin-like growth factor I receptor                                                             | 1,47 | 0,0097 |
| 1445178_at   | Sh3rf1    | SH3 domain containing ring finger 1                                                               | 1,47 | 0,0095 |
| 1415811_at   | Uhrf1     | ubiquitin-like, containing PHD and RING finger domains, 1                                         | 1,47 | 0,0440 |
| 1444361_at   | Ap1s2     | adaptor-related protein complex 1, sigma 2 subunit                                                | 1,47 | 0,0006 |
| 1426926_at   | Plcg2     | phospholipase C, gamma 2                                                                          | 1,47 | 0,0045 |
| 1419739_at   | Tpm2      | tropomyosin 2, beta                                                                               | 1,47 | 0,0183 |
| 1436985_at   | Zfp644    | zinc finger protein 644                                                                           | 1,47 | 0,0441 |
| 1452948_at   | Tnfaip8l2 | tumor necrosis factor, alpha-induced protein 8-like 2                                             | 1,47 | 0,0271 |
| 1444780_at   | Nav2      | neuron navigator 2                                                                                | 1,47 | 0,0335 |
| 1420330_at   | Clec4e    | C-type lectin domain family 4, member e                                                           | 1,47 | 0,0272 |
| 1417756_a_at | Lsp1      | lymphocyte specific 1                                                                             | 1,47 | 0,0443 |
| 1438312_s_at | Scyl1     | SCY1-like 1 (S. cerevisiae)                                                                       | 1,46 | 0,0138 |
| 1418641_at   | Lcp2      | lymphocyte cytosolic protein 2                                                                    | 1,46 | 0,0302 |
| 1455900_x_at | Tgm2      | transglutaminase 2, C polypeptide                                                                 | 1,46 | 0,0040 |
| 1422619_at   | Ppap2a    | phosphatidic acid phosphatase type 2A                                                             | 1,46 | 0,0132 |
| 1424367_a_at | Homer2    | homer homolog 2 (Drosophila)                                                                      | 1,46 | 0,0010 |
| 1423416_at   | Smarcc1   | SWI/SNF related, matrix associated, actin dependent regulator of chromatin, subfamily c, member 1 | 1,46 | 0,0165 |
| 1445728_at   | Rdh18     | retinol dehydrogenase 18                                                                          | 1,46 | 0,0432 |
| 1448919_at   | Cd302     | CD302 antigen                                                                                     | 1,46 | 0,0088 |
| 1442075_at   | AI314604  | expressed sequence AI314604                                                                       | 1,46 | 0,0232 |
| 1449028_at   | Rhou      | ras homolog gene family, member U                                                                 | 1,46 | 0,0380 |
| 1429459_at   | Sema3d    | sema domain, immunoglobulin domain (Ig), short basic domain, secreted, (semaphorin) 3D            | 1,46 | 0,0065 |
| 1429304_at   | Ankrd10   | ankyrin repeat domain 10                                                                          | 1,46 | 0,0018 |
| 1437020_at   | Ep400     | E1A binding protein p400                                                                          | 1,46 | 0,0198 |
| 1439901_at   | NA        | NA                                                                                                | 1,46 | 0,0062 |
| 1452107_s_at | NA        | NA                                                                                                | 1,46 | 0,0442 |
| 1427299_at   | Rps6ka3   | ribosomal protein S6 kinase polypeptide 3                                                         | 1,46 | 0,0058 |
| 1415856_at   | Emb       | embigin                                                                                           | 1,46 | 0,0074 |
| 1427911_at   | Tmem173   | transmembrane protein 173                                                                         | 1,46 | 0,0040 |
| 1415919_at   | Npdc1     | neural proliferation, differentiation and control gene 1                                          | 1,46 | 0,0312 |
| 1428529_at   | Rik       | 2810026P18                                                                                        | 1,46 | 0,0285 |
| 1420991_at   | Ankrd1    | RIKEN cDNA 2810026P18 gene<br>ankyrin repeat domain 1 (cardiac muscle)                            | 1,46 | 0,0194 |

|              |            |                                                                                                                     |      |        |
|--------------|------------|---------------------------------------------------------------------------------------------------------------------|------|--------|
| 1446946_at   | NA         | NA                                                                                                                  | 1,46 | 0,0140 |
| 1447913_x_at | Akap9      | A kinase (PRKA) anchor protein (yotiao) 9                                                                           | 1,45 | 0,0089 |
| 1443341_at   | NA         | NA                                                                                                                  | 1,45 | 0,0436 |
| 1457664_x_at | C2         | complement component 2 (within H-2S)                                                                                | 1,45 | 0,0491 |
| 1423725_at   | Pls3       | plastin 3 (T-isoform)                                                                                               | 1,45 | 0,0143 |
| 1419610_at   | Ccr1       | chemokine (C-C motif) receptor 1                                                                                    | 1,45 | 0,0036 |
| 1450851_at   | Wdr1       | WD repeat domain 1                                                                                                  | 1,45 | 0,0144 |
| 1436921_at   | Atp7a      | ATPase, Cu <sup>++</sup> transporting, alpha polypeptide                                                            | 1,45 | 0,0130 |
| 1423208_at   | Tmem167    | transmembrane protein 167                                                                                           | 1,45 | 0,0105 |
| 1450541_at   | Pvt1       | plasmacytoma variant translocation 1                                                                                | 1,45 | 0,0151 |
| 1453313_at   | Sesn3      | sestrin 3                                                                                                           | 1,45 | 0,0212 |
| 1441486_at   | Fkbp15     | FK506 binding protein 15                                                                                            | 1,45 | 0,0336 |
| 1420895_at   | Tgfr1      | transforming growth factor, beta receptor I                                                                         | 1,45 | 0,0130 |
| 1425884_at   | Bxdc1      | brix domain containing 1                                                                                            | 1,45 | 0,0267 |
| 1418591_at   | Dnaja4     | DnaJ (Hsp40) homolog, subfamily A, member 4                                                                         | 1,45 | 0,0038 |
| 1457233_at   | Dnaja2     | DnaJ (Hsp40) homolog, subfamily A, member 2                                                                         | 1,45 | 0,0170 |
| 1449353_at   | Zmat3      | zinc finger matrin type 3                                                                                           | 1,45 | 0,0095 |
| 1430048_at   | Rik        | RIKEN cDNA 7630402104 gene<br>Wolf-Hirschhorn syndrome candidate 1-like 1<br>(human)                                | 1,45 | 0,0402 |
| 1447931_at   | Whsc111    |                                                                                                                     | 1,45 | 0,0042 |
| 1435653_at   | NA         | NA                                                                                                                  | 1,45 | 0,0071 |
| 1433776_at   | Lhfp       | lipoma HMGIC fusion partner                                                                                         | 1,45 | 0,0023 |
| 1457753_at   | Tlr13      | toll-like receptor 13                                                                                               | 1,45 | 0,0275 |
| 1425609_at   | Ncf1       | neutrophil cytosolic factor 1                                                                                       | 1,45 | 0,0311 |
| 1440770_at   | Bcl2       | B-cell leukemia/lymphoma 2                                                                                          | 1,45 | 0,0366 |
| 1417137_at   | Uck2       | uridine-cytidine kinase 2                                                                                           | 1,45 | 0,0138 |
| 1454898_s_at | lah1       | isoamyl acetate-hydrolyzing esterase 1 homolog (S.<br>cerevisiae)                                                   | 1,45 | 0,0150 |
|              | E130112L23 |                                                                                                                     |      |        |
| 1438485_at   | Rik        | RIKEN cDNA E130112L23 gene                                                                                          | 1,45 | 0,0023 |
| 1438789_s_at | Dpysl3     | dihydropyrimidinase-like 3                                                                                          | 1,45 | 0,0186 |
| 1417455_at   | Tgfb3      | transforming growth factor, beta 3                                                                                  | 1,44 | 0,0447 |
| 1437843_s_at | Nupl1      | nucleoporin like 1                                                                                                  | 1,44 | 0,0414 |
| 1450099_a_at | Gba        | glucosidase, beta, acid                                                                                             | 1,44 | 0,0330 |
|              | B230216N2  |                                                                                                                     |      |        |
| 1439304_at   | 4Rik       | RIKEN cDNA B230216N24 gene                                                                                          | 1,44 | 0,0321 |
| 1428902_at   | Chst11     | carbohydrate sulfotransferase 11                                                                                    | 1,44 | 0,0026 |
| 1452893_s_at | Enho       | energy homeostasis associated<br>LIM domain containing preferred translocation partner<br>in lipoma                 | 1,44 | 0,0357 |
| 1440167_s_at | Lpp        |                                                                                                                     | 1,44 | 0,0472 |
| 1423546_at   | Zfp207     | zinc finger protein 207                                                                                             | 1,44 | 0,0015 |
| 1438730_at   | BC028801   | cDNA sequence BC028801                                                                                              | 1,44 | 0,0114 |
| 1433964_s_at | Fermt3     | fermitin family homolog 3 (Drosophila)                                                                              | 1,44 | 0,0131 |
| 1449840_at   | Sntb2      | syntrophin, basic 2                                                                                                 | 1,44 | 0,0033 |
| 1427266_at   | Pbrm1      | polybromo 1                                                                                                         | 1,44 | 0,0045 |
| 1437692_x_at | Anxa2      | annexin A2                                                                                                          | 1,44 | 0,0210 |
| 1417380_at   | Iqgap1     | IQ motif containing GTPase activating protein 1<br>carnitine deficiency-associated gene expressed in<br>ventricle 3 | 1,44 | 0,0192 |
| 1415704_a_at | Cdv3       | angiotensin I converting enzyme (peptidyl-dipeptidase<br>A) 1                                                       | 1,44 | 0,0031 |
| 1427034_at   | Ace        |                                                                                                                     | 1,44 | 0,0452 |
| 1419208_at   | Map3k8     | mitogen-activated protein kinase kinase kinase 8                                                                    | 1,44 | 0,0343 |
| 1417124_at   | Dstn       | destrin                                                                                                             | 1,44 | 0,0144 |
|              | 1700025G0  |                                                                                                                     |      |        |
| 1444235_at   | 4Rik       | RIKEN cDNA 1700025G04 gene                                                                                          | 1,44 | 0,0191 |
| 1424783_a_at | Ugt1a9     | UDP glucuronosyltransferase 1 family, polypeptide                                                                   | 1,44 | 0,0115 |

|              |            | A9                                                    |      |        |
|--------------|------------|-------------------------------------------------------|------|--------|
| 1442295_at   | Arpc2      | actin related protein 2/3 complex, subunit 2          | 1,44 | 0,0146 |
| 1422506_a_at | Cstb       | cystatin B                                            | 1,44 | 0,0023 |
| 1439610_at   | Rab27b     | RAB27b, member RAS oncogene family                    | 1,44 | 0,0029 |
| 1440414_at   | Mtf1       | metal response element binding transcription factor 1 | 1,44 | 0,0374 |
| 1442623_at   | NA         | NA                                                    | 1,44 | 0,0032 |
|              | A730054J21 |                                                       |      |        |
| 1438531_at   | Rik        | RIKEN cDNA A730054J21 gene                            | 1,44 | 0,0324 |
| 1450083_at   | Cnot4      | CCR4-NOT transcription complex, subunit 4             | 1,44 | 0,0236 |
| 1422878_at   | Syt12      | synaptotagmin XII                                     | 1,44 | 0,0170 |
|              |            | microtubule associated monooxygenase, calponin and    |      |        |
| 1416759_at   | Mical1     | LIM domain containing 1                               | 1,44 | 0,0162 |
| 1420398_at   | Rgs18      | regulator of G-protein signaling 18                   | 1,44 | 0,0145 |
| 1428130_at   | Lman1      | lectin, mannose-binding, 1                            | 1,44 | 0,0219 |
| 1460133_at   | NA         | NA                                                    | 1,44 | 0,0026 |
| 1458616_at   | NA         | NA                                                    | 1,44 | 0,0370 |
|              |            | protein phosphatase 1, regulatory (inhibitor) subunit |      |        |
| 1429487_at   | Ppp1r12a   | 12A                                                   | 1,44 | 0,0207 |
| 1460036_at   | Ap1s2      | adaptor-related protein complex 1, sigma 2 subunit    | 1,44 | 0,0294 |
|              | C130075A2  |                                                       |      |        |
| 1442845_at   | ORik       | RIKEN cDNA C130075A20 gene                            | 1,43 | 0,0070 |
| 1421905_at   | Tgs1       | trimethylguanosine synthase homolog (S. cerevisiae)   | 1,43 | 0,0307 |
| 1440092_at   | NA         | NA                                                    | 1,43 | 0,0117 |
|              |            | protein kinase, AMP-activated, beta 2 non-catalytic   |      |        |
| 1435875_at   | Prkab2     | subunit                                               | 1,43 | 0,0043 |
| 1445311_at   | Akap13     | A kinase (PRKA) anchor protein 13                     | 1,43 | 0,0397 |
| 1434458_at   | Fst        | follicle-stimulating hormone receptor-like 1          | 1,43 | 0,0091 |
| 1447984_at   | D1Ert75e   | DNA segment, Chr 1, ERATO Doi 75, expressed           | 1,43 | 0,0415 |
|              |            | splA/ryanodine receptor domain and SOCS box           |      |        |
| 1451418_a_at | Spsb4      | containing 4                                          | 1,43 | 0,0378 |
| 1448950_at   | Il1r1      | interleukin 1 receptor, type I                        | 1,43 | 0,0106 |
|              | A130019P1  |                                                       |      |        |
| 1441204_at   | ORik       | RIKEN cDNA A130019P10 gene                            | 1,43 | 0,0044 |
| 1420980_at   | Pak1       | p21 (CDKN1A)-activated kinase 1                       | 1,43 | 0,0052 |
| 1437821_at   | NA         | NA                                                    | 1,43 | 0,0053 |
| 1452784_at   | Itgav      | integrin alpha V                                      | 1,43 | 0,0096 |
| 1452381_at   | Creb3l2    | cAMP responsive element binding protein 3-like 2      | 1,43 | 0,0140 |
| 1429659_at   | Smc2       | structural maintenance of chromosomes 2               | 1,43 | 0,0245 |
|              | 1190002N15 |                                                       |      |        |
| 1433581_at   | Rik        | RIKEN cDNA 1190002N15 gene                            | 1,43 | 0,0388 |
| 1418110_a_at | Inpp5d     | inositol polyphosphate-5-phosphatase D                | 1,43 | 0,0107 |
| 1417135_at   | Srpk2      | serine/arginine-rich protein specific kinase 2        | 1,43 | 0,0315 |
| 1426612_at   | Tipin      | timeless interacting protein                          | 1,43 | 0,0037 |
| 1444701_at   | Mex3c      | mex3 homolog C (C. elegans)                           | 1,43 | 0,0100 |
| 1441968_at   | Tspan9     | tetraspanin 9                                         | 1,43 | 0,0191 |
| 1415827_a_at | Serp1      | stress-associated endoplasmic reticulum protein 1     | 1,43 | 0,0246 |
|              | 6720463M2  |                                                       |      |        |
| 1429478_at   | 4Rik       | RIKEN cDNA 6720463M24 gene                            | 1,43 | 0,0438 |
| 1426941_at   | Muc15      | mucin 15                                              | 1,43 | 0,0161 |
| 1444570_at   | NA         | NA                                                    | 1,43 | 0,0152 |
| 1417040_a_at | Bok        | BCL2-related ovarian killer protein                   | 1,43 | 0,0392 |
| 1421223_a_at | Anxa4      | annexin A4                                            | 1,43 | 0,0032 |
| 1422195_s_at | Tbx15      | T-box 15                                              | 1,43 | 0,0190 |
|              |            | FERM, RhoGEF (Arhgef) and pleckstrin domain           |      |        |
| 1452280_at   | Farp1      | protein 1 (chondrocyte-derived)                       | 1,42 | 0,0010 |
| 1446938_at   | AA408213   | expressed sequence AA408213                           | 1,42 | 0,0165 |
| 1426370_at   | Far1       | fatty acyl CoA reductase 1                            | 1,42 | 0,0091 |

|              |              |                                                                                                               |      |        |
|--------------|--------------|---------------------------------------------------------------------------------------------------------------|------|--------|
| 1425850_a_at | Nek6         | NIMA (never in mitosis gene a)-related expressed kinase 6                                                     | 1,42 | 0,0161 |
| 1419695_at   | St8sia1      | ST8 alpha-N-acetyl-neuraminide alpha-2,8-sialyltransferase 1                                                  | 1,42 | 0,0399 |
| 1440011_at   | NA           | NA                                                                                                            | 1,42 | 0,0313 |
| 1456826_at   | Taok2        | TAO kinase 2                                                                                                  | 1,42 | 0,0274 |
| 1419236_at   | Helb         | helicase (DNA) B                                                                                              | 1,42 | 0,0459 |
| 1451832_at   | Cklf         | chemokine-like factor                                                                                         | 1,42 | 0,0315 |
| 1456653_a_at | Mthfd1l      | methylenetetrahydrofolate dehydrogenase (NADP+ dependent) 1-like                                              | 1,42 | 0,0252 |
| 1423596_at   | Nek6         | NIMA (never in mitosis gene a)-related expressed kinase 6                                                     | 1,42 | 0,0117 |
| 1450658_at   | Adamts5      | a disintegrin-like and metallopeptidase (reprolysin type) with thrombospondin type 1 motif, 5 (aggrecanase-2) | 1,42 | 0,0357 |
| 1456893_at   | NA           | NA                                                                                                            | 1,42 | 0,0178 |
| 1437635_at   | St3gal6      | ST3 beta-galactoside alpha-2,3-sialyltransferase 6                                                            | 1,42 | 0,0017 |
| 1439413_x_at | Morf4l2      | mortality factor 4 like 2                                                                                     | 1,42 | 0,0041 |
| 1416066_at   | Cd9          | CD9 antigen                                                                                                   | 1,42 | 0,0047 |
| 1452769_at   | Rnf145       | ring finger protein 145                                                                                       | 1,42 | 0,0030 |
| 1423875_at   | Fam160b1     | family with sequence similarity 160, member B1                                                                | 1,42 | 0,0178 |
| 1457088_at   | Pldn         | pallidin                                                                                                      | 1,42 | 0,0402 |
| 1428168_at   | Mpzl1        | myelin protein zero-like 1                                                                                    | 1,42 | 0,0417 |
| 1456743_x_at | Morf4l2      | mortality factor 4 like 2                                                                                     | 1,42 | 0,0041 |
| 1426534_a_at | Arfgap3      | ADP-ribosylation factor GTPase activating protein 3                                                           | 1,42 | 0,0040 |
| 1421253_at   | Nrap         | nebulin-related anchoring protein                                                                             | 1,42 | 0,0041 |
| 1460243_at   | Sptlc2       | serine palmitoyltransferase, long chain base subunit 2                                                        | 1,42 | 0,0245 |
| 1436171_at   | Arhgap30     | Rho GTPase activating protein 30                                                                              | 1,41 | 0,0405 |
| 1424424_at   | Slc39a1      | solute carrier family 39 (zinc transporter), member 1                                                         | 1,41 | 0,0064 |
| 1446326_at   | Col1a2       | collagen, type I, alpha 2                                                                                     | 1,41 | 0,0475 |
| 1418429_at   | Kif5b        | kinesin family member 5B                                                                                      | 1,41 | 0,0133 |
| 1416548_at   | Slc35b4      | solute carrier family 35, member B4                                                                           | 1,41 | 0,0181 |
| 1444241_at   | LOC100044766 | similar to WW domain-containing adapter protein with coiled-coil                                              | 1,41 | 0,0130 |
| 1444483_at   | NA           | NA                                                                                                            | 1,41 | 0,0372 |
| 1441243_at   | NA           | NA                                                                                                            | 1,41 | 0,0053 |
| 1431311_at   | NA           | NA                                                                                                            | 1,41 | 0,0151 |
| 1445066_at   | NA           | NA                                                                                                            | 1,41 | 0,0156 |
| 1444006_at   | Setd2        | SET domain containing 2                                                                                       | 1,41 | 0,0323 |
| 1448885_at   | Rap2b        | RAP2B, member of RAS oncogene family                                                                          | 1,41 | 0,0136 |
| 1429270_a_at | Syce2        | synaptonemal complex central element protein 2                                                                | 1,41 | 0,0345 |
| 1447143_at   | NA           | NA                                                                                                            | 1,41 | 0,0443 |
| 1424894_at   | Rab13        | RAB13, member RAS oncogene family                                                                             | 1,41 | 0,0401 |
| 1454950_at   | Fam168a      | family with sequence similarity 168, member A                                                                 | 1,41 | 0,0339 |
| 1445252_at   | Kremen1      | kringle containing transmembrane protein 1                                                                    | 1,41 | 0,0235 |
| 1442331_at   | NA           | NA                                                                                                            | 1,41 | 0,0122 |
| 1442347_at   | Lrp8         | low density lipoprotein receptor-related protein 8, apolipoprotein e receptor                                 | 1,41 | 0,0391 |
| 1455994_x_at | Elov1l       | elongation of very long chain fatty acids (FEN1/Elo2, SUR4/Elo3, yeast)-like 1                                | 1,41 | 0,0230 |
| 1447426_at   | NA           | NA                                                                                                            | 1,41 | 0,0389 |
| 1451419_at   | Spsb4        | splA/ryanodine receptor domain and SOCS box containing 4                                                      | 1,41 | 0,0440 |
| 1453015_at   | 5830471E12   | RIKEN cDNA 5830471E12 gene                                                                                    | 1,41 | 0,0073 |
| 1440247_at   | Rik          | RIKEN cDNA 5830471E12 gene                                                                                    | 1,41 | 0,0073 |
| 1440247_at   | Phf14        | PHD finger protein 14                                                                                         | 1,41 | 0,0039 |
| 1460526_at   | 4833420L08   | RIKEN cDNA 4833420L08 gene                                                                                    | 1,41 | 0,0175 |

|              |            |                                                                                              |      |        |
|--------------|------------|----------------------------------------------------------------------------------------------|------|--------|
|              | Rik        |                                                                                              |      |        |
| 1444886_at   | NA         | NA                                                                                           | 1,41 | 0,0469 |
| 1433481_at   | Fkbp14     | FK506 binding protein 14                                                                     | 1,41 | 0,0109 |
| 1456382_at   | Atad1      | ATPase family, AAA domain containing 1                                                       | 1,41 | 0,0321 |
| 1428136_at   | Sfrp1      | secreted frizzled-related protein 1                                                          | 1,41 | 0,0461 |
| 1419898_s_at | Zc3h7a     | zinc finger CCCH type containing 7 A                                                         | 1,41 | 0,0187 |
| 1426392_a_at | Actr3      | ARP3 actin-related protein 3 homolog (yeast)                                                 | 1,41 | 0,0111 |
| 1437467_at   | Alcam      | activated leukocyte cell adhesion molecule                                                   | 1,41 | 0,0329 |
| 1433467_at   | Slc7a6     | solute carrier family 7 (cationic amino acid transporter, y+ system), member 6               | 1,41 | 0,0028 |
| 1426603_at   | Rnasel     | ribonuclease L (2', 5'-oligoadenylate synthetase-dependent)                                  | 1,41 | 0,0047 |
| 1426559_at   | Sbno1      | sno, strawberry notch homolog 1 (Drosophila)                                                 | 1,40 | 0,0151 |
| 1442951_at   | NA         | NA                                                                                           | 1,40 | 0,0185 |
| 1443090_at   | NA         | NA                                                                                           | 1,40 | 0,0446 |
| 1448954_at   | Nrip3      | nuclear receptor interacting protein 3                                                       | 1,40 | 0,0468 |
| 1457706_at   | BC030336   | cDNA sequence BC030336                                                                       | 1,40 | 0,0323 |
| 1459332_at   | Itch       | itchy, E3 ubiquitin protein ligase                                                           | 1,40 | 0,0289 |
| 1454780_at   | Galnt14    | UDP-N-acetyl-alpha-D-galactosamine:polypeptide N-acetylgalactosaminyltransferase-like 4      | 1,40 | 0,0154 |
| 1424110_a_at | Nme1       | non-metastatic cells 1, protein (NM23A) expressed in                                         | 1,40 | 0,0095 |
| 1455656_at   | Btla       | B and T lymphocyte associated carnitine deficiency-associated gene expressed in              | 1,40 | 0,0141 |
| 1451100_a_at | Cdv3       | ventricle 3                                                                                  | 1,40 | 0,0087 |
| 1427169_at   | Pard3b     | par-3 partitioning defective 3 homolog B (C. elegans)                                        | 1,40 | 0,0050 |
| 1451319_at   | Senp1      | SUMO1/sentrin specific peptidase 1                                                           | 1,40 | 0,0173 |
| 1460104_at   | Vps4b      | vacuolar protein sorting 4b (yeast)                                                          | 1,40 | 0,0329 |
| 1443330_at   | D1Ert646e  | DNA segment, Chr 1, ERATO Doi 646, expressed                                                 | 1,40 | 0,0264 |
| 1419829_a_at | NA         | NA                                                                                           | 1,40 | 0,0087 |
| 1458886_at   | NA         | NA                                                                                           | 1,40 | 0,0247 |
| 1418895_at   | Skap2      | src family associated phosphoprotein 2                                                       | 1,40 | 0,0294 |
| 1456611_at   | Fam13a     | family with sequence similarity 13, member A                                                 | 1,40 | 0,0387 |
| 1444273_at   | AW555355   | expressed sequence AW555355                                                                  | 1,40 | 0,0207 |
| 1424198_at   | Dlg5       | discs, large homolog 5 (Drosophila)                                                          | 1,40 | 0,0136 |
| 1449265_at   | Casp1      | caspase 1                                                                                    | 1,40 | 0,0201 |
| 1428983_at   | Scx        | scleraxis                                                                                    | 1,40 | 0,0199 |
|              | 4933439C10 |                                                                                              |      |        |
| 1438437_a_at | Rik        | RIKEN cDNA 4933439C10 gene                                                                   | 1,40 | 0,0313 |
| 1421654_a_at | Lmna       | lamin A                                                                                      | 1,40 | 0,0047 |
| 1437886_at   | Klhl6      | kelch-like 6 (Drosophila)                                                                    | 1,40 | 0,0440 |
| 1426477_at   | Rasa1      | RAS p21 protein activator 1                                                                  | 1,40 | 0,0323 |
| 1433505_a_at | Lrrc8d     | leucine rich repeat containing 8D                                                            | 1,40 | 0,0053 |
| 1436546_at   | NA         | NA                                                                                           | 1,40 | 0,0304 |
| 1426951_at   | Crim1      | cysteine rich transmembrane BMP regulator 1 (chordin like)                                   | 1,40 | 0,0355 |
| 1458884_at   | Plekha1    | pleckstrin homology domain containing, family A (phosphoinositide binding specific) member 1 | 1,40 | 0,0296 |
| 1456294_at   | Rnft1      | ring finger protein, transmembrane 1                                                         | 1,39 | 0,0422 |
| 1444229_at   | Nr2f2      | nuclear receptor subfamily 2, group F, member 2                                              | 1,39 | 0,0126 |
| 1446807_at   | Usp50      | ubiquitin specific peptidase 50                                                              | 1,39 | 0,0346 |
| 1458988_at   | NA         | NA                                                                                           | 1,39 | 0,0264 |
| 1417068_a_at | Ptpn1      | protein tyrosine phosphatase, non-receptor type 1                                            | 1,39 | 0,0038 |
| 1424529_s_at | Cgref1     | cell growth regulator with EF hand domain 1                                                  | 1,39 | 0,0241 |
|              | 2210009G2  |                                                                                              |      |        |
| 1431831_at   | 1Rik       | RIKEN cDNA 2210009G21 gene                                                                   | 1,39 | 0,0178 |
| 1442050_at   | Zfp608     | zinc finger protein 608                                                                      | 1,39 | 0,0264 |
| 1423956_at   | Smap1      | stromal membrane-associated protein 1                                                        | 1,39 | 0,0058 |

|              |            |                                                              |      |        |
|--------------|------------|--------------------------------------------------------------|------|--------|
| 1422550_a_at | Mtap6      | microtubule-associated protein 6                             | 1,39 | 0,0115 |
| 1457782_at   | Tln1       | talin 1                                                      | 1,39 | 0,0255 |
| 1425460_at   | Mtmr2      | myotubularin related protein 2                               | 1,39 | 0,0198 |
| 1451649_a_at | Wdr75      | WD repeat domain 75                                          | 1,39 | 0,0116 |
| 1437864_at   | Adipor2    | adiponectin receptor 2                                       | 1,39 | 0,0302 |
| 1418981_at   | Casp12     | caspase 12                                                   | 1,39 | 0,0371 |
| 1444101_at   | Odf2       | outer dense fiber of sperm tails 2                           | 1,39 | 0,0193 |
|              | 4833418A01 |                                                              |      |        |
| 1433831_at   | Rik        | RIKEN cDNA 4833418A01 gene                                   | 1,39 | 0,0442 |
| 1439209_at   | Tcf12      | transcription factor 12                                      | 1,39 | 0,0091 |
| 1448513_a_at | Npc2       | Niemann Pick type C2                                         | 1,39 | 0,0040 |
| 1454664_a_at | Eif5       | eukaryotic translation initiation factor 5                   | 1,39 | 0,0493 |
|              |            | v-ral simian leukemia viral oncogene homolog B (ras related) |      |        |
| 1435517_x_at | Ralb       |                                                              | 1,39 | 0,0088 |
| 1456503_at   | Nup214     | nucleoporin 214                                              | 1,39 | 0,0284 |
|              | 5430435G2  |                                                              |      |        |
| 1424987_at   | 2Rik       | RIKEN cDNA 5430435G22 gene                                   | 1,39 | 0,0088 |
| 1423465_at   | Frrs1      | ferric-chelate reductase 1                                   | 1,39 | 0,0171 |
| 1446361_at   | NA         | NA                                                           | 1,39 | 0,0183 |
| 1442550_at   | NA         | NA                                                           | 1,39 | 0,0168 |
| 1452839_at   | Dph5       | DPH5 homolog (S. cerevisiae)                                 | 1,39 | 0,0177 |
| 1451362_at   | Rab711     | RAB7, member RAS oncogene family-like 1                      | 1,39 | 0,0189 |
| 1422286_a_at | Tgif1      | TGFB-induced factor homeobox 1                               | 1,39 | 0,0342 |
| 1443314_at   | Slc12a6    | solute carrier family 12, member 6                           | 1,39 | 0,0338 |
| 1418822_a_at | Arf6       | ADP-ribosylation factor 6                                    | 1,39 | 0,0402 |
| 1426329_s_at | Baalc      | brain and acute leukemia, cytoplasmic                        | 1,39 | 0,0383 |
| 1417012_at   | Sdc2       | syndecan 2                                                   | 1,39 | 0,0308 |
| 1441660_at   | Actr2      | ARP2 actin-related protein 2 homolog (yeast)                 | 1,39 | 0,0480 |
| 1433531_at   | Acsl4      | acyl-CoA synthetase long-chain family member 4               | 1,39 | 0,0483 |
| 1437333_x_at | Aldh18a1   | aldehyde dehydrogenase 18 family, member A1                  | 1,39 | 0,0360 |
| 1437277_x_at | Tgm2       | transglutaminase 2, C polypeptide                            | 1,39 | 0,0087 |
| 1433412_at   | Fam108b    | family with sequence similarity 108, member B                | 1,39 | 0,0177 |
| 1421413_a_at | Pdlim5     | PDZ and LIM domain 5                                         | 1,39 | 0,0312 |
| 1460671_at   | Gpx1       | glutathione peroxidase 1                                     | 1,38 | 0,0028 |
| 1422812_at   | Cxcr6      | chemokine (C-X-C motif) receptor 6                           | 1,38 | 0,0032 |
| 1422733_at   | Fjx1       | four jointed box 1 (Drosophila)                              | 1,38 | 0,0086 |
|              |            | a disintegrin and metallopeptidase domain 9 (meltrin gamma)  |      |        |
| 1416094_at   | Adam9      |                                                              | 1,38 | 0,0008 |
| 1444796_at   | C76876     | expressed sequence C76876                                    | 1,38 | 0,0131 |
| 1456720_at   | NA         | NA                                                           | 1,38 | 0,0361 |
| 1447345_at   | NA         | NA                                                           | 1,38 | 0,0081 |
| 1416606_s_at | Nhp2       | NHP2 ribonucleoprotein homolog (yeast)                       | 1,38 | 0,0037 |
| 1449530_at   | Trps1      | trichorhinophalangeal syndrome I (human)                     | 1,38 | 0,0057 |
| 1426461_at   | Ugp2       | UDP-glucose pyrophosphorylase 2                              | 1,38 | 0,0029 |
| 1441052_at   | NA         | NA                                                           | 1,38 | 0,0154 |
| 1460338_a_at | Crif3      | cytokine receptor-like factor 3                              | 1,38 | 0,0053 |
|              | 4732429D16 |                                                              |      |        |
| 1424832_at   | Rik        | RIKEN cDNA 4732429D16 gene                                   | 1,38 | 0,0324 |
| 1434951_at   | Armc8      | armadillo repeat containing 8                                | 1,38 | 0,0414 |
| 1459253_at   | Arrdc3     | arrestin domain containing 3                                 | 1,38 | 0,0445 |
| 1449859_at   | Golt1b     | golgi transport 1 homolog B (S. cerevisiae)                  | 1,38 | 0,0234 |
| 1460287_at   | Timp2      | tissue inhibitor of metalloproteinase 2                      | 1,38 | 0,0457 |
| 1445440_at   | Ccdc88a    | coiled coil domain containing 88A                            | 1,38 | 0,0066 |
| 1440559_at   | Hmga2-ps1  | high mobility group AT-hook 2, pseudogene 1                  | 1,38 | 0,0454 |
| 1416527_at   | Rab32      | RAB32, member RAS oncogene family                            | 1,38 | 0,0242 |
| 1426903_at   | Fndc3a     | fibronectin type III domain containing 3A                    | 1,38 | 0,0274 |

|              |            |                                                        |      |        |
|--------------|------------|--------------------------------------------------------|------|--------|
| 1450291_s_at | Ms4a4c     | membrane-spanning 4-domains, subfamily A, member 4C    | 1,38 | 0,0078 |
| 1434949_at   | Armc8      | armadillo repeat containing 8                          | 1,38 | 0,0482 |
| 1442849_at   | Lrp1       | low density lipoprotein receptor-related protein 1     | 1,38 | 0,0072 |
| 1446850_at   | NA         | NA                                                     | 1,38 | 0,0179 |
| 1451154_a_at | Cugbp2     | CUG triplet repeat, RNA binding protein 2              | 1,38 | 0,0101 |
| 1440920_at   | Mmp14      | matrix metalloproteinase 14 (membrane-inserted)        | 1,37 | 0,0047 |
|              | 1110012D08 |                                                        |      |        |
| 1433820_a_at | Rik        | RIKEN cDNA 1110012D08 gene                             | 1,37 | 0,0281 |
| 1447985_s_at | Ankib1     | ankyrin repeat and IBR domain containing 1             | 1,37 | 0,0414 |
| 1434519_at   | Ddah1      | dimethylarginine dimethylaminohydrolase 1              | 1,37 | 0,0228 |
| 1451316_a_at | Picalm     | phosphatidylinositol binding clathrin assembly protein | 1,37 | 0,0366 |
| 1422053_at   | Inhba      | inhibin beta-A                                         | 1,37 | 0,0198 |
| 1416002_x_at | Cotl1      | coactosin-like 1 (Dictyostelium)                       | 1,37 | 0,0433 |
| 1426081_a_at | Dio2       | deiodinase, iodothyronine, type II                     | 1,37 | 0,0254 |
| 1443654_at   | Ankfy1     | ankyrin repeat and FYVE domain containing 1            | 1,37 | 0,0459 |
| 1445105_at   | NA         | NA                                                     | 1,37 | 0,0450 |
| 1454724_x_at | Fam108b    | family with sequence similarity 108, member B          | 1,37 | 0,0456 |
| 1459865_x_at | Ces7       | carboxylesterase 7                                     | 1,37 | 0,0131 |
| 1425523_at   | Rbm25      | RNA binding motif protein 25                           | 1,37 | 0,0295 |
|              | RP23-      | novel similar to human Nance-Horan syndrome            |      |        |
| 1455040_s_at | 448C18.1   | protein (RP11-262D11.5)                                | 1,37 | 0,0473 |
| 1431361_at   | Prcp       | prolylcarboxypeptidase (angiotensinase C)              | 1,37 | 0,0101 |
| 1436293_x_at | Ildr2      | immunoglobulin-like domain containing receptor 2       | 1,37 | 0,0110 |
| 1447280_at   | NA         | NA                                                     | 1,37 | 0,0477 |
| 1438663_at   | Bat2d      | BAT2 domain containing 1                               | 1,37 | 0,0293 |
| 1439044_at   | Zfp354c    | zinc finger protein 354C                               | 1,37 | 0,0400 |
| 1419728_at   | Cxcl5      | chemokine (C-X-C motif) ligand 5                       | 1,37 | 0,0030 |
|              |            | microtubule associated serine/threonine kinase family  |      |        |
| 1439318_at   | Mast4      | member 4                                               | 1,37 | 0,0243 |
| 1446490_at   | NA         | NA                                                     | 1,37 | 0,0252 |
| 1436938_at   | Rbms3      | RNA binding motif, single stranded interacting protein | 1,37 | 0,0393 |
|              |            | solute carrier family 16 (monocarboxylic acid          |      |        |
| 1417884_at   | Slc16a6    | transporters), member 6                                | 1,37 | 0,0389 |
|              |            | solute carrier family 7 (cationic amino acid           |      |        |
| 1460541_at   | Slc7a6     | transporter, y+ system), member 6                      | 1,37 | 0,0310 |
| 1452374_at   | Zfp322a    | zinc finger protein 322A                               | 1,37 | 0,0076 |
| 1420957_at   | Apc        | adenomatosis polyposis coli                            | 1,37 | 0,0166 |
| 1420992_at   | Ankrd1     | ankyrin repeat domain 1 (cardiac muscle)               | 1,36 | 0,0130 |
| 1452051_at   | Actr3      | ARP3 actin-related protein 3 homolog (yeast)           | 1,36 | 0,0196 |
| 1455960_at   | Megf9      | multiple EGF-like-domains 9                            | 1,36 | 0,0412 |
| 1456887_at   | Cmklr1     | chemokine-like receptor 1                              | 1,36 | 0,0192 |
|              |            | PRP38 pre-mRNA processing factor 38 (yeast)            |      |        |
| 1455016_at   | Prpf38b    | domain containing B                                    | 1,36 | 0,0493 |
|              |            | UDP-Gal:betaGlcNAc beta 1,3-galactosyltransferase,     |      |        |
| 1459801_at   | B3galt5    | polypeptide 5                                          | 1,36 | 0,0135 |
| 1427854_x_at | Hspb1      | heat shock protein 1                                   | 1,36 | 0,0312 |
| 1449042_at   | Ctcf       | CCCTC-binding factor                                   | 1,36 | 0,0491 |
| 1439432_x_at | Morf4l2    | mortality factor 4 like 2                              | 1,36 | 0,0161 |
|              | 4833412K13 |                                                        |      |        |
| 1432719_at   | Rik        | RIKEN cDNA 4833412K13 gene                             | 1,36 | 0,0083 |
| 1448283_a_at | Uba2       | ubiquitin-like modifier activating enzyme 2            | 1,36 | 0,0046 |
| 1426812_a_at | Fam129b    | family with sequence similarity 129, member B          | 1,36 | 0,0495 |
| 1444232_at   | Prkg1      | protein kinase, cGMP-dependent, type I                 | 1,36 | 0,0094 |
| 1455580_at   | Usp6nl     | USP6 N-terminal like                                   | 1,36 | 0,0444 |
| 1419867_a_at | Ankhd1     | ankyrin repeat and KH domain containing 1              | 1,36 | 0,0442 |
| 1433440_x_at | Uba2       | ubiquitin-like modifier activating enzyme 2            | 1,36 | 0,0118 |

|              |            |                                                                                                          |      |        |
|--------------|------------|----------------------------------------------------------------------------------------------------------|------|--------|
| 1457814_at   | NA         | NA                                                                                                       | 1,36 | 0,0485 |
| 1429400_at   | Clcn5      | chloride channel 5                                                                                       | 1,36 | 0,0015 |
| 1445826_at   | Ankrd17    | ankyrin repeat domain 17                                                                                 | 1,36 | 0,0279 |
| 1449947_s_at | Zfhx3      | zinc finger homeobox 3                                                                                   | 1,36 | 0,0158 |
| 1421385_a_at | Myo7a      | myosin VIIA                                                                                              | 1,36 | 0,0151 |
| 1418324_at   | Fem1b      | feminization 1 homolog b (C. elegans)                                                                    | 1,36 | 0,0336 |
| 1426587_a_at | Stat3      | signal transducer and activator of transcription 3<br>tumor necrosis factor receptor superfamily, member | 1,36 | 0,0459 |
| 1417291_at   | Tnfrsf1a   | 1a                                                                                                       | 1,36 | 0,0005 |
|              | 4933439C20 |                                                                                                          |      |        |
| 1434975_x_at | Rik        | RIKEN cDNA 4933439C20 gene                                                                               | 1,36 | 0,0447 |
| 1446434_at   | NA         | NA                                                                                                       | 1,36 | 0,0030 |
| 1416844_at   | Prmt2      | protein arginine N-methyltransferase 2                                                                   | 1,36 | 0,0148 |
| 1439394_x_at | Cdc20      | cell division cycle 20 homolog (S. cerevisiae)                                                           | 1,36 | 0,0290 |
| 1451985_at   | Lrrk1      | leucine-rich repeat kinase 1                                                                             | 1,36 | 0,0192 |
| 1451750_at   | Irak4      | interleukin-1 receptor-associated kinase 4                                                               | 1,36 | 0,0072 |
| 1433547_s_at | Nudcd1     | NudC domain containing 1                                                                                 | 1,36 | 0,0288 |
| 1421792_s_at | Trem2      | triggering receptor expressed on myeloid cells 2                                                         | 1,36 | 0,0256 |
| 1447509_at   | NA         | NA                                                                                                       | 1,36 | 0,0336 |
|              | 1810012K16 |                                                                                                          |      |        |
| 1447594_at   | Rik        | RIKEN cDNA 1810012K16 gene<br>N-acetylneuraminic acid synthase (sialic acid                              | 1,36 | 0,0253 |
|              |            | synthase)                                                                                                |      |        |
| 1417774_at   | Nans       |                                                                                                          | 1,36 | 0,0370 |
| 1457211_at   | Gls        | glutaminase                                                                                              | 1,35 | 0,0009 |
| 1443651_at   | Phc3       | polyhomeotic-like 3 (Drosophila)                                                                         | 1,35 | 0,0018 |
| 1419250_a_at | Pftk1      | PFTAIRE protein kinase 1                                                                                 | 1,35 | 0,0025 |
| 1431432_at   | Cfl2       | cofilin 2, muscle                                                                                        | 1,35 | 0,0171 |
| 1419806_at   | Hdlbp      | high density lipoprotein (HDL) binding protein                                                           | 1,35 | 0,0339 |
| 1453796_a_at | Ergic2     | ERGIC and golgi 2                                                                                        | 1,35 | 0,0234 |
|              | D930014E1  |                                                                                                          |      |        |
| 1450959_at   | 7Rik       | RIKEN cDNA D930014E17 gene                                                                               | 1,35 | 0,0048 |
| 1429963_at   | Mapk6      | mitogen-activated protein kinase 6                                                                       | 1,35 | 0,0322 |
| 1424940_s_at | BC022687   | cDNA sequence BC022687                                                                                   | 1,35 | 0,0236 |
| 1418539_a_at | Ptpre      | protein tyrosine phosphatase, receptor type, E                                                           | 1,35 | 0,0076 |
| 1436063_at   | Lox11      | lysyl oxidase-like 1                                                                                     | 1,35 | 0,0242 |
| 1455642_a_at | Tspan17    | tetraspanin 17                                                                                           | 1,35 | 0,0095 |
| 1456205_x_at | Tbca       | tubulin cofactor A                                                                                       | 1,35 | 0,0044 |
| 1420023_at   | Etf1       | eukaryotic translation termination factor 1                                                              | 1,35 | 0,0306 |
| 1416108_a_at | Tmed3      | transmembrane emp24 domain containing 3<br>colony stimulating factor 2 receptor, beta, low-affinity      | 1,35 | 0,0078 |
|              |            | (granulocyte-macrophage)                                                                                 |      |        |
| 1421326_at   | Csf2rb     |                                                                                                          | 1,35 | 0,0447 |
| 1429549_at   | Col27a1    | collagen, type XXVII, alpha 1                                                                            | 1,35 | 0,0087 |
|              | OTTMUSG0   |                                                                                                          |      |        |
| 1437392_at   | 0000015750 | predicted gene, OTTMUSG00000015750                                                                       | 1,35 | 0,0302 |
| 1417719_at   | Sap30      | sin3 associated polypeptide                                                                              | 1,35 | 0,0118 |
| 1416189_a_at | Sec61a1    | Sec61 alpha 1 subunit (S. cerevisiae)                                                                    | 1,35 | 0,0055 |
| 1416311_s_at | Tuba3a     | tubulin, alpha 3A<br>guanine nucleotide binding protein (G protein),                                     | 1,35 | 0,0479 |
|              |            | gamma 2                                                                                                  |      |        |
| 1428156_at   | Gng2       |                                                                                                          | 1,35 | 0,0269 |
| 1437526_x_at | EG620521   | predicted gene, EG620521                                                                                 | 1,35 | 0,0478 |
| 1458057_at   | NA         | NA                                                                                                       | 1,35 | 0,0378 |
| 1419108_at   | Ophn1      | oligophrenin 1                                                                                           | 1,35 | 0,0108 |
| 1446444_at   | Rc3h2      | ring finger and CCCH-type zinc finger domains 2<br>solute carrier family 25 (mitochondrial carrier,      | 1,35 | 0,0417 |
|              |            | peroxisomal membrane protein), member 17                                                                 |      |        |
| 1424912_at   | Slc25a17   |                                                                                                          | 1,35 | 0,0285 |
| 1433428_x_at | Tgm2       | transglutaminase 2, C polypeptide                                                                        | 1,35 | 0,0146 |
| 1456712_at   | Lcorl      | ligand dependent nuclear receptor corepressor-like                                                       | 1,35 | 0,0142 |



|              |            |                                                           |      |        |
|--------------|------------|-----------------------------------------------------------|------|--------|
| 1420935_a_at | Srrm1      | serine/arginine repetitive matrix 1                       | 1,35 | 0,0132 |
| 1416598_at   | Glis2      | GLIS family zinc finger 2                                 | 1,35 | 0,0453 |
| 1447567_at   | Odz3       | odd Oz/ten-m homolog 3 (Drosophila)                       | 1,35 | 0,0187 |
| 1456196_x_at | Fkbp1a     | FK506 binding protein 1a                                  | 1,35 | 0,0044 |
| 1451218_at   | Edem1      | ER degradation enhancer, mannosidase alpha-like 1         | 1,35 | 0,0472 |
| 1437632_at   | Med14      | mediator complex subunit 14                               | 1,35 | 0,0389 |
| 1418379_s_at | Gpr124     | G protein-coupled receptor 124                            | 1,34 | 0,0193 |
| 1433908_a_at | Cttn       | cortactin                                                 | 1,34 | 0,0013 |
|              | D430034N2  |                                                           |      |        |
| 1446351_at   | 1          | hypothetical protein D430034N21                           | 1,34 | 0,0040 |
| 1449968_s_at | Acot10     | acyl-CoA thioesterase 10                                  | 1,34 | 0,0019 |
| 1447685_x_at | Ets2       | E26 avian leukemia oncogene 2, 3' domain                  | 1,34 | 0,0483 |
| 1433962_at   | Trmt61a    | tRNA methyltransferase 61 homolog A (S. cerevisiae)       | 1,34 | 0,0190 |
| 1458134_at   | NA         | NA                                                        | 1,34 | 0,0194 |
|              |            | fascin homolog 1, actin bundling protein                  |      |        |
| 1448378_at   | Fscn1      | (Strongylocentrotus purpuratus)                           | 1,34 | 0,0137 |
|              | 9330156P08 |                                                           |      |        |
| 1458073_at   | Rik        | RIKEN cDNA 9330156P08 gene                                | 1,34 | 0,0397 |
|              |            | glial cell line derived neurotrophic factor family        |      |        |
| 1459847_x_at | Gfra2      | receptor alpha 2                                          | 1,34 | 0,0201 |
| 1438508_at   | NA         | NA                                                        | 1,34 | 0,0475 |
| 1423521_at   | Lmnb1      | lamin B1                                                  | 1,34 | 0,0487 |
| 1420818_at   | Sla        | src-like adaptor                                          | 1,34 | 0,0207 |
| 1455649_at   | Ttc9       | tetratricopeptide repeat domain 9                         | 1,34 | 0,0147 |
| 1423484_at   | Bicc1      | bicaudal C homolog 1 (Drosophila)                         | 1,34 | 0,0233 |
| 1436311_at   | Gemin5     | gem (nuclear organelle) associated protein 5              | 1,34 | 0,0424 |
| 1440404_at   | NA         | NA                                                        | 1,34 | 0,0147 |
| 1430151_at   | Nisch      | nischarin                                                 | 1,34 | 0,0482 |
| 1444677_at   | C77673     | expressed sequence C77673                                 | 1,34 | 0,0298 |
| 1451643_a_at | Rab4b      | RAB4B, member RAS oncogene family                         | 1,34 | 0,0174 |
| 1449209_a_at | Rdh11      | retinol dehydrogenase 11                                  | 1,34 | 0,0326 |
| 1442523_at   | EG331392   | predicted gene, EG331392                                  | 1,34 | 0,0208 |
| 1424398_at   | Dhx36      | DEAH (Asp-Glu-Ala-His) box polypeptide 36                 | 1,34 | 0,0207 |
|              |            | protein tyrosine phosphatase, non-receptor type 22        |      |        |
| 1417995_at   | Ptpn22     | (lymphoid)                                                | 1,34 | 0,0172 |
| 1428325_at   | Cnpy4      | canopy 4 homolog (zebrafish)                              | 1,34 | 0,0389 |
| 1448148_at   | Grn        | granulin                                                  | 1,34 | 0,0143 |
| 1446737_a_at | Hook3      | hook homolog 3 (Drosophila)                               | 1,34 | 0,0231 |
|              | 6720420G1  |                                                           |      |        |
| 1432787_at   | 8Rik       | RIKEN cDNA 6720420G18 gene                                | 1,34 | 0,0313 |
| 1417319_at   | Pvrl3      | poliovirus receptor-related 3                             | 1,34 | 0,0488 |
| 1417417_a_at | Cox6a1     | cytochrome c oxidase, subunit VI a, polypeptide 1         | 1,34 | 0,0254 |
|              |            | elongation of very long chain fatty acids (FEN1/Elo2,     |      |        |
| 1456530_x_at | Elov1      | SUR4/Elo3, yeast)-like 1                                  | 1,34 | 0,0479 |
|              |            | UTP23, small subunit (SSU) processome component,          |      |        |
| 1429937_at   | Utp23      | homolog (yeast)                                           | 1,34 | 0,0026 |
| 1455833_at   | Afap1l2    | actin filament associated protein 1-like 2                | 1,34 | 0,0252 |
| 1433502_s_at | Tsr1       | TSR1, 20S rRNA accumulation, homolog (yeast)              | 1,34 | 0,0184 |
| 1433833_at   | Fndc3b     | fibronectin type III domain containing 3B                 | 1,34 | 0,0495 |
| 1424084_at   | Rod1       | ROD1 regulator of differentiation 1 (S. pombe)            | 1,34 | 0,0038 |
| 1452451_at   | mCG_21548  | brain expressed, associated with Nedd4                    | 1,34 | 0,0137 |
| 1417471_s_at | D1Ert622e  | DNA segment, Chr 1, ERATO Doi 622, expressed              | 1,34 | 0,0482 |
| 1449278_at   | Eif2ak3    | eukaryotic translation initiation factor 2 alpha kinase 3 | 1,33 | 0,0281 |
|              |            | kynurenine 3-monooxygenase (kynurenine 3-                 |      |        |
| 1418998_at   | Kmo        | hydroxylase)                                              | 1,33 | 0,0121 |
| 1424389_at   | Nup1       | nucleoporin like 1                                        | 1,33 | 0,0313 |
| 1447272_s_at | Atp10a     | ATPase, class V, type 10A                                 | 1,33 | 0,0109 |

|              |            |                                                                                            |      |        |
|--------------|------------|--------------------------------------------------------------------------------------------|------|--------|
| 1426976_at   | Usp47      | ubiquitin specific peptidase 47                                                            | 1,33 | 0,0077 |
| 1444320_at   | Ddhd2      | DDHD domain containing 2                                                                   | 1,33 | 0,0426 |
| 1416489_at   | Pi4k2b     | phosphatidylinositol 4-kinase type 2 beta                                                  | 1,33 | 0,0340 |
| 1453228_at   | Stx11      | syntaxin 11                                                                                | 1,33 | 0,0440 |
| 1446289_at   | NA         | NA                                                                                         | 1,33 | 0,0117 |
| 1437148_at   | Arpc2      | actin related protein 2/3 complex, subunit 2                                               | 1,33 | 0,0015 |
| 1457615_at   | NA         | NA                                                                                         | 1,33 | 0,0048 |
| 1431099_at   | Hoxd8      | homeo box D8                                                                               | 1,33 | 0,0230 |
| 1449323_a_at | Rpl3       | ribosomal protein L3                                                                       | 1,33 | 0,0011 |
| 1435136_at   | Whsc1      | Wolf-Hirschhorn syndrome candidate 1 (human)                                               | 1,33 | 0,0173 |
| 1442116_at   | Gpr176     | G protein-coupled receptor 176                                                             | 1,33 | 0,0272 |
| 1455489_at   | Lrrtm2     | leucine rich repeat transmembrane neuronal 2                                               | 1,33 | 0,0437 |
|              |            | protein phosphatase 1, regulatory (inhibitor) subunit 12B                                  |      |        |
| 1431462_at   | Ppp1r12b   |                                                                                            | 1,33 | 0,0083 |
| 1457569_at   | D8Ert51e   | DNA segment, Chr 8, ERATO Doi 51, expressed                                                | 1,33 | 0,0159 |
| 1457770_at   | Slc39a14   | solute carrier family 39 (zinc transporter), member 14                                     | 1,33 | 0,0304 |
| 1438621_x_at | Axl        | AXL receptor tyrosine kinase                                                               | 1,33 | 0,0494 |
| 1457935_at   | NA         | NA                                                                                         | 1,33 | 0,0264 |
|              |            | 2310047O1                                                                                  |      |        |
| 1418963_at   | 3Rik       | RIKEN cDNA 2310047O13 gene                                                                 | 1,33 | 0,0058 |
| 1419061_at   | Rhod       | ras homolog gene family, member D                                                          | 1,33 | 0,0366 |
|              |            | RNA (guanine-9-) methyltransferase domain containing 2                                     |      |        |
| 1447781_s_at | Rg9mtd2    |                                                                                            | 1,33 | 0,0292 |
| 1420473_at   | Mtpn       | myotrophin                                                                                 | 1,33 | 0,0130 |
| 1452415_at   | Actn1      | actinin, alpha 1                                                                           | 1,33 | 0,0264 |
| 1437465_a_at | P4hb       | prolyl 4-hydroxylase, beta polypeptide                                                     | 1,33 | 0,0105 |
| 1458054_at   | Ext1       | exostoses (multiple) 1                                                                     | 1,33 | 0,0275 |
| 1443303_at   | NA         | NA                                                                                         | 1,33 | 0,0245 |
|              |            | 9030425E11                                                                                 |      |        |
| 1448250_at   | Rik        | RIKEN cDNA 9030425E11 gene                                                                 | 1,33 | 0,0232 |
|              |            | ST6 (alpha-N-acetyl-neuraminyl-2,3-beta-galactosyl-1,3)-N-acetylgalactosaminide alpha-2,6- |      |        |
| 1418075_at   | St6galnac4 | sialyltransferase 4                                                                        | 1,33 | 0,0426 |
|              |            | hematological and neurological expressed sequence 1                                        |      |        |
| 1416028_a_at | Hn1        |                                                                                            | 1,33 | 0,0264 |
| 1438771_at   | Brd1       | bromodomain containing 1                                                                   | 1,33 | 0,0324 |
| 1436660_at   | Rrbp1      | ribosome binding protein 1                                                                 | 1,33 | 0,0477 |
| 1460437_at   | Cyth4      | cytohesin 4                                                                                | 1,33 | 0,0295 |
| 1448409_at   | Lrmp       | lymphoid-restricted membrane protein                                                       | 1,33 | 0,0200 |
| 1459622_at   | Gm22       | gene model 22, (NCBI)                                                                      | 1,33 | 0,0267 |
| 1423643_at   | Ddx39      | DEAD (Asp-Glu-Ala-Asp) box polypeptide 39                                                  | 1,32 | 0,0309 |
| 1437618_x_at | Gpr85      | G protein-coupled receptor 85                                                              | 1,32 | 0,0088 |
|              |            | UDP-Gal:betaGlcNAc beta 1,3-galactosyltransferase, polypeptide 1                           |      |        |
| 1441396_at   | B3galt1    |                                                                                            | 1,32 | 0,0040 |
| 1423877_at   | Chaf1b     | chromatin assembly factor 1, subunit B (p60)                                               | 1,32 | 0,0438 |
| 1446941_at   | C78505     | expressed sequence C78505                                                                  | 1,32 | 0,0061 |
| 1436900_x_at | Leprot     | leptin receptor overlapping transcript                                                     | 1,32 | 0,0211 |
| 1428373_at   | Ip6k2      | inositol hexaphosphate kinase 2                                                            | 1,32 | 0,0307 |
| 1455799_at   | Rorb       | RAR-related orphan receptor beta                                                           | 1,32 | 0,0478 |
| 1416901_at   | Npc2       | Niemann Pick type C2                                                                       | 1,32 | 0,0061 |
| 1426569_a_at | Frk        | fyn-related kinase                                                                         | 1,32 | 0,0452 |
| 1426685_a_at | Cnot6      | CCR4-NOT transcription complex, subunit 6                                                  | 1,32 | 0,0440 |
| 1447549_x_at | Ninj1      | ninjurin 1                                                                                 | 1,32 | 0,0192 |
| 1446209_at   | Usp40      | ubiquitin specific peptidase 40                                                            | 1,32 | 0,0133 |
| 1427229_at   | Hmgcr      | 3-hydroxy-3-methylglutaryl-Coenzyme A reductase                                            | 1,32 | 0,0491 |
| 1419648_at   | Myo1c      | myosin IC                                                                                  | 1,32 | 0,0249 |
| 1434590_at   | Bend6      | BEN domain containing 6                                                                    | 1,32 | 0,0145 |

|              |            |                                                                                        |      |        |
|--------------|------------|----------------------------------------------------------------------------------------|------|--------|
| 1438947_x_at | Sema3f     | sema domain, immunoglobulin domain (Ig), short basic domain, secreted, (semaphorin) 3F | 1,32 | 0,0303 |
| 1426573_at   | Me2        | malic enzyme 2, NAD(+)-dependent, mitochondrial                                        | 1,32 | 0,0447 |
| 1444931_at   | NA         | NA                                                                                     | 1,32 | 0,0498 |
| 1427231_at   | Robo1      | roundabout homolog 1 (Drosophila)                                                      | 1,32 | 0,0466 |
| 1418545_at   | Wasf1      | WASP family 1                                                                          | 1,32 | 0,0243 |
| 1450911_at   | Ppib       | peptidylprolyl isomerase B                                                             | 1,32 | 0,0048 |
| 1456488_at   | Wdr33      | WD repeat domain 33                                                                    | 1,32 | 0,0295 |
| 1450964_a_at | Osbp19     | oxysterol binding protein-like 9                                                       | 1,32 | 0,0054 |
|              | C130079B0  |                                                                                        |      |        |
| 1441632_at   | 9Rik       | RIKEN cDNA C130079B09 gene                                                             | 1,32 | 0,0448 |
| 1445966_at   | NA         | NA                                                                                     | 1,32 | 0,0076 |
| 1434985_a_at | Eif4a1     | eukaryotic translation initiation factor 4A1                                           | 1,31 | 0,0059 |
| 1415778_at   | Morf4l2    | mortality factor 4 like 2                                                              | 1,31 | 0,0054 |
| 1422593_at   | Ap3s1      | adaptor-related protein complex 3, sigma 1 subunit                                     | 1,31 | 0,0224 |
| 1443222_at   | NA         | NA                                                                                     | 1,31 | 0,0328 |
| 1418305_s_at | Gar1       | GAR1 ribonucleoprotein homolog (yeast)                                                 | 1,31 | 0,0220 |
| 1451120_at   | Polr1d     | polymerase (RNA) I polypeptide D                                                       | 1,31 | 0,0157 |
| 1450018_s_at | Slc25a30   | solute carrier family 25, member 30                                                    | 1,31 | 0,0449 |
| 1437615_s_at | Vps37c     | vacuolar protein sorting 37C (yeast)                                                   | 1,31 | 0,0256 |
|              | LOC100045  |                                                                                        |      |        |
| 1455725_a_at | 490        | similar to H3 histone, family 3A                                                       | 1,31 | 0,0231 |
| 1418512_at   | Stk3       | serine/threonine kinase 3 (Ste20, yeast homolog)                                       | 1,31 | 0,0267 |
| 1430918_at   | Mrz 03     | membrane-associated ring finger (C3HC4) 3                                              | 1,31 | 0,0141 |
| 1434959_at   | Dhh        | desert hedgehog                                                                        | 1,31 | 0,0070 |
| 1416308_at   | Ugdh       | UDP-glucose dehydrogenase                                                              | 1,31 | 0,0245 |
| 1454060_a_at | Nras       | neuroblastoma ras oncogene                                                             | 1,31 | 0,0493 |
| 1452286_at   | Slain2     | SLAIN motif family, member 2                                                           | 1,31 | 0,0009 |
| 1447703_x_at | Zfp593     | zinc finger protein 593                                                                | 1,31 | 0,0495 |
| 1417523_at   | Plek       | pleckstrin                                                                             | 1,31 | 0,0076 |
|              | 4930447F24 |                                                                                        |      |        |
| 1441750_x_at | Rik        | RIKEN cDNA 4930447F24 gene                                                             | 1,31 | 0,0288 |
| 1459254_at   | Cdca2      | cell division cycle associated 2                                                       | 1,31 | 0,0142 |
| 1436497_at   | NA         | NA                                                                                     | 1,31 | 0,0231 |
| 1415944_at   | Sdc1       | syndecan 1                                                                             | 1,31 | 0,0152 |
| 1429671_at   | Scand3     | SCAN domain containing 3                                                               | 1,31 | 0,0197 |
| 1444562_at   | NA         | NA                                                                                     | 1,31 | 0,0095 |
| 1446653_at   | NA         | NA                                                                                     | 1,31 | 0,0283 |
|              | 2310067E19 |                                                                                        |      |        |
| 1453448_at   | Rik        | RIKEN cDNA 2310067E19 gene                                                             | 1,31 | 0,0491 |
| 1422629_s_at | Shroom3    | shroom family member 3                                                                 | 1,31 | 0,0445 |
| 1446670_at   | NA         | NA                                                                                     | 1,31 | 0,0430 |
| 1436332_at   | Hspb6      | heat shock protein, alpha-crystallin-related, B6                                       | 1,30 | 0,0030 |
|              | D15Wsu126  | DNA segment, Chr 15, Wayne State University 126, expressed                             |      |        |
| 1446972_at   | e          |                                                                                        | 1,30 | 0,0123 |
| 1416744_at   | Uap1       | UDP-N-acetylglucosamine pyrophosphorylase 1                                            | 1,30 | 0,0475 |
| 1420613_at   | Ptp4a2     | protein tyrosine phosphatase 4a2<br>hematological and neurological expressed sequence  | 1,30 | 0,0414 |
|              | 1          |                                                                                        |      |        |
| 1448180_a_at | Hn1        |                                                                                        | 1,30 | 0,0112 |
| 1434158_at   | Gmcs       | GDP-mannose 4, 6-dehydratase                                                           | 1,30 | 0,0178 |
| 1439060_s_at | Wipi1      | WD repeat domain, phosphoinositide interacting 1                                       | 1,30 | 0,0043 |
| 1423383_a_at | Osbp19     | oxysterol binding protein-like 9                                                       | 1,30 | 0,0069 |
| 1452410_a_at | Fes        | feline sarcoma oncogene                                                                | 1,30 | 0,0414 |
| 1437074_at   | Snx5       | sorting nexin 5                                                                        | 1,30 | 0,0495 |
| 1428527_at   | Snx7       | sorting nexin 7                                                                        | 1,30 | 0,0057 |
| 1446570_at   | NA         | NA                                                                                     | 1,30 | 0,0178 |

|              |           |                                                                                     |      |        |
|--------------|-----------|-------------------------------------------------------------------------------------|------|--------|
| 1455731_at   | Slc29a3   | solute carrier family 29 (nucleoside transporters), member 3                        | 1,30 | 0,0281 |
| 1427143_at   | Jarid1b   | jumonji, AT rich interactive domain 1B (Rbp2 like)                                  | 1,30 | 0,0067 |
| 1439814_at   | Atp8b4    | ATPase, class I, type 8B, member 4                                                  | 1,30 | 0,0494 |
| 1425921_a_at | 2Rik      | RIKEN cDNA 1810055G02 gene                                                          | 1,30 | 0,0296 |
| 1426854_a_at | 898       | similar to protein phosphatase 2A inhibitor-2 I-2PP2A                               | 1,30 | 0,0442 |
| 1459011_at   | NA        | NA                                                                                  | 1,30 | 0,0460 |
| 1434968_a_at | Actr3     | ARP3 actin-related protein 3 homolog (yeast)                                        | 1,30 | 0,0034 |
| 1420649_at   | Zfhx3     | zinc finger homeobox 3                                                              | 1,30 | 0,0128 |
| 1424134_at   | Rspry1    | ring finger and SPRY domain containing 1                                            | 1,30 | 0,0048 |
| 1457434_s_at | Ptpla     | protein tyrosine phosphatase-like (proline instead of catalytic arginine), member a | 1,30 | 0,0075 |
| 1451798_at   | Il1rn     | interleukin 1 receptor antagonist                                                   | 1,30 | 0,0428 |
| 1437735_at   | Ppp1r12a  | protein phosphatase 1, regulatory (inhibitor) subunit 12A                           | 1,30 | 0,0443 |
| 1449258_at   | D11Wsu99e | DNA segment, Chr 11, Wayne State University 99, expressed                           | 1,30 | 0,0037 |
| 1434087_at   | Mthfr     | 5,10-methylenetetrahydrofolate reductase                                            | 1,30 | 0,0114 |
| 1434485_a_at | Ugp2      | UDP-glucose pyrophosphorylase 2                                                     | 1,30 | 0,0413 |
| 1442590_at   | Tnfrsf22  | tumor necrosis factor receptor superfamily, member 22                               | 1,30 | 0,0406 |
| 1421477_at   | Cplx2     | complexin 2                                                                         | 1,30 | 0,0163 |
| 1430749_at   | Rik       | RIKEN cDNA 2810040C05 gene                                                          | 1,30 | 0,0417 |
| 1447504_at   | NA        | NA                                                                                  | 1,30 | 0,0158 |
| 1455796_x_at | Olfm1     | olfactomedin 1                                                                      | 1,29 | 0,0124 |
| 1453191_at   | Col27a1   | collagen, type XXVII, alpha 1                                                       | 1,29 | 0,0276 |
| 1456822_at   | Rad23b    | RAD23b homolog (S. cerevisiae)                                                      | 1,29 | 0,0284 |
| 1427892_at   | Myo1g     | myosin IG                                                                           | 1,29 | 0,0443 |
| 1428262_s_at | Hnrnpa3   | heterogeneous nuclear ribonucleoprotein A3                                          | 1,29 | 0,0422 |
| 1442142_at   | Rik       | RIKEN cDNA 2700050L05 gene                                                          | 1,29 | 0,0122 |
| 1445718_at   | NA        | NA                                                                                  | 1,29 | 0,0173 |
| 1417252_at   | Nt5c      | 5',3'-nucleotidase, cytosolic                                                       | 1,29 | 0,0342 |
| 1421534_at   | LOC14210  | hypothetical LOC14210                                                               | 1,29 | 0,0443 |
| 1433976_at   | Reep3     | receptor accessory protein 3                                                        | 1,29 | 0,0209 |
| 1425410_at   | Tprkb     | Tp53rk binding protein                                                              | 1,29 | 0,0075 |
| 1447284_at   | Trem1     | triggering receptor expressed on myeloid cells 1                                    | 1,29 | 0,0312 |
| 1458115_at   | Rik       | RIKEN cDNA 4930512H18 gene                                                          | 1,29 | 0,0210 |
| 1426382_at   | Ppm1b     | protein phosphatase 1B, magnesium dependent, beta isoform                           | 1,29 | 0,0028 |
| 1458781_at   | NA        | NA                                                                                  | 1,29 | 0,0192 |
| 1456656_at   | Lin7a     | lin-7 homolog A (C. elegans)                                                        | 1,29 | 0,0352 |
| 1453426_a_at | Wdfy1     | WD repeat and FYVE domain containing 1                                              | 1,29 | 0,0252 |
| 1418733_at   | Twist1    | twist homolog 1 (Drosophila)                                                        | 1,29 | 0,0330 |
| 1436807_x_at | Trim62    | tripartite motif-containing 62                                                      | 1,29 | 0,0368 |
| 1456315_a_at | Ptpla     | protein tyrosine phosphatase-like (proline instead of catalytic arginine), member a | 1,29 | 0,0111 |
| 1419207_at   | Zfp37     | zinc finger protein 37                                                              | 1,29 | 0,0241 |
| 1419217_at   | Sergef    | secretion regulating guanine nucleotide exchange factor                             | 1,29 | 0,0141 |
| 1459248_at   | NA        | NA                                                                                  | 1,29 | 0,0464 |
| 1420295_x_at | Clcn5     | chloride channel 5                                                                  | 1,29 | 0,0062 |
| 1455333_at   | Tns3      | tensin 3                                                                            | 1,28 | 0,0220 |
| 1458850_at   | NA        | NA                                                                                  | 1,28 | 0,0381 |

|              |            |                                                                                    |      |        |
|--------------|------------|------------------------------------------------------------------------------------|------|--------|
| 1436984_at   | Abi2       | abl-interactor 2                                                                   | 1,28 | 0,0452 |
| 1442065_at   | Arhgap17   | Rho GTPase activating protein 17                                                   | 1,28 | 0,0213 |
| 1450026_a_at | B3gnt2     | UDP-GlcNAc:betaGal beta-1,3-N-acetylglucosaminyltransferase 2                      | 1,28 | 0,0137 |
| 1437080_s_at | OTTMUSG0   |                                                                                    |      |        |
| 1445687_at   | 0000015538 | predicted gene, OTTMUSG00000015538                                                 | 1,28 | 0,0308 |
|              | Gm885      | gene model 885, (NCBI)                                                             | 1,28 | 0,0409 |
|              | 9430091N11 |                                                                                    |      |        |
| 1442352_at   | Rik        | RIKEN cDNA 9430091N11 gene                                                         | 1,28 | 0,0242 |
|              |            | potassium inwardly-rectifying channel, subfamily J, member 14                      |      |        |
| 1452243_at   | Kcnj14     |                                                                                    | 1,28 | 0,0477 |
|              | OTTMUSG0   |                                                                                    |      |        |
| 1459657_s_at | 0000008305 | predicted gene, OTTMUSG00000008305                                                 | 1,28 | 0,0254 |
| 1416257_at   | Capn2      | calpain 2                                                                          | 1,28 | 0,0234 |
| 1454979_at   | Diap1      | diaphanous homolog 1 (Drosophila)                                                  | 1,28 | 0,0026 |
| 1433786_x_at | Serf2      | small EDRK-rich factor 2                                                           | 1,28 | 0,0326 |
| 1417349_at   | Pldn       | pallidin                                                                           | 1,28 | 0,0248 |
|              |            | nuclear factor of activated T-cells, cytoplasmic, calcineurin-dependent 4          |      |        |
| 1454369_a_at | Nfatc4     | ST8 alpha-N-acetyl-neuraminide alpha-2,8-sialyltransferase 1                       | 1,28 | 0,0054 |
| 1419694_at   | St8sia1    |                                                                                    | 1,28 | 0,0393 |
| 1427142_s_at | Jarid1b    | jumonji, AT rich interactive domain 1B (Rbp2 like)                                 | 1,28 | 0,0449 |
| 1429345_at   | Tubgcp4    | tubulin, gamma complex associated protein 4                                        | 1,28 | 0,0181 |
|              |            | amyotrophic lateral sclerosis 2 (juvenile) chromosome region, candidate 12 (human) |      |        |
| 1439758_at   | Als2cr12   |                                                                                    | 1,28 | 0,0202 |
| 1437197_at   | Sorbs2     | sorbin and SH3 domain containing 2                                                 | 1,28 | 0,0385 |
| 1423783_at   | Tor2a      | torsin family 2, member A                                                          | 1,28 | 0,0483 |
| 1416605_at   | Nhp2       | NHP2 ribonucleoprotein homolog (yeast)                                             | 1,28 | 0,0435 |
| 1439888_at   | NA         | NA                                                                                 | 1,28 | 0,0130 |
| 1417675_a_at | Mdn1       | midasin homolog (yeast)                                                            | 1,28 | 0,0335 |
| 1449976_a_at | Gpr35      | G protein-coupled receptor 35                                                      | 1,28 | 0,0144 |
| 1437855_at   | Mtap4      | microtubule-associated protein 4                                                   | 1,28 | 0,0205 |
| 1460231_at   | Irf5       | interferon regulatory factor 5                                                     | 1,28 | 0,0211 |
| 1417763_at   | Ssr1       | signal sequence receptor, alpha                                                    | 1,27 | 0,0241 |
| 1416260_a_at | Snx1       | sorting nexin 1                                                                    | 1,27 | 0,0264 |
|              | 4933411E06 |                                                                                    |      |        |
| 1432643_at   | Rik        | RIKEN cDNA 4933411E06 gene                                                         | 1,27 | 0,0354 |
| 1438958_x_at | Fkbp1a     | FK506 binding protein 1a                                                           | 1,27 | 0,0223 |
| 1422602_a_at | Wnt5b      | wingless-related MMTV integration site 5B                                          | 1,27 | 0,0362 |
|              | 3200002M1  |                                                                                    |      |        |
| 1424327_at   | 9Rik       | RIKEN cDNA 3200002M19 gene                                                         | 1,27 | 0,0091 |
|              | OTTMUSG0   |                                                                                    |      |        |
| 1447320_x_at | 0000008305 | predicted gene, OTTMUSG00000008305                                                 | 1,27 | 0,0106 |
| 1430311_at   | Marcks     | myristoylated alanine rich protein kinase C substrate                              | 1,27 | 0,0425 |
| 1443267_at   | NA         | NA                                                                                 | 1,27 | 0,0312 |
| 1424780_a_at | Reep3      | receptor accessory protein 3                                                       | 1,27 | 0,0168 |
| 1450455_s_at | Akr1c12    | aldo-keto reductase family 1, member C12                                           | 1,27 | 0,0205 |
| 1417559_at   | Sfxn1      | sideroflexin 1                                                                     | 1,27 | 0,0356 |
| 1426565_at   | Igf1r      | insulin-like growth factor I receptor                                              | 1,27 | 0,0437 |
| 1427670_a_at | Tcf12      | transcription factor 12                                                            | 1,27 | 0,0232 |
| 1424572_a_at | H2afy      | H2A histone family, member Y                                                       | 1,27 | 0,0285 |
| 1442914_at   | NA         | NA                                                                                 | 1,27 | 0,0288 |
| 1445093_at   | NA         | NA                                                                                 | 1,27 | 0,0415 |
| 1450107_a_at | Renbp      | renin binding protein                                                              | 1,27 | 0,0468 |
| 1437393_at   | Prkca      | protein kinase C, alpha                                                            | 1,27 | 0,0442 |
| 1443911_at   | NA         | NA                                                                                 | 1,27 | 0,0131 |
| 1417790_at   | Dok1       | docking protein 1                                                                  | 1,27 | 0,0254 |

|              |                        |                                                                                |      |        |
|--------------|------------------------|--------------------------------------------------------------------------------|------|--------|
| 1452237_at   | Agfg1                  | ArfGAP with FG repeats 1<br>calcium/calmodulin-dependent protein kinase kinase | 1,27 | 0,0200 |
| 1418954_at   | Camkk1                 | 1, alpha                                                                       | 1,27 | 0,0074 |
| 1448832_a_at | Cplx1                  | complexin 1                                                                    | 1,27 | 0,0354 |
| 1419034_at   | Csnk2a1                | casein kinase 2, alpha 1 polypeptide                                           | 1,27 | 0,0152 |
| 1417032_at   | Ube2g2                 | ubiquitin-conjugating enzyme E2G 2                                             | 1,27 | 0,0155 |
| 1416280_at   | Uba2                   | ubiquitin-like modifier activating enzyme 2                                    | 1,27 | 0,0097 |
| 1452631_at   | Rufy2                  | RUN and FYVE domain-containing 2                                               | 1,27 | 0,0249 |
| 1436237_at   | Ttc9                   | tetratricopeptide repeat domain 9                                              | 1,27 | 0,0148 |
| 1418672_at   | Akr1c13                | aldo-keto reductase family 1, member C13                                       | 1,27 | 0,0475 |
| 1432926_at   | NA                     | NA                                                                             | 1,26 | 0,0488 |
| 1419493_a_at | Tpd52                  | tumor protein D52                                                              | 1,26 | 0,0023 |
| 1439911_at   | NA                     | NA                                                                             | 1,26 | 0,0492 |
| 1456195_x_at | Itgb5                  | integrin beta 5                                                                | 1,26 | 0,0242 |
| 1435345_at   | Cercam                 | cerebral endothelial cell adhesion molecule                                    | 1,26 | 0,0149 |
| 1417853_at   | Clca1                  | chloride channel calcium activated 1                                           | 1,26 | 0,0267 |
| 1428018_a_at | AF251705<br>1110057K04 | cDNA sequence AF251705                                                         | 1,26 | 0,0101 |
| 1440295_at   | Rik                    | RIKEN cDNA 1110057K04 gene                                                     | 1,26 | 0,0449 |
| 1448328_at   | Sh3bp2                 | SH3-domain binding protein 2                                                   | 1,26 | 0,0340 |
| 1455162_at   | Ttc39a                 | tetratricopeptide repeat domain 39A                                            | 1,26 | 0,0314 |
| 1447006_at   | NA                     | NA                                                                             | 1,26 | 0,0079 |
| 1453175_at   | Zbtb25                 | zinc finger and BTB domain containing 25                                       | 1,26 | 0,0394 |
| 1458588_at   | NA                     | NA                                                                             | 1,26 | 0,0237 |
| 1439106_at   | Zfp462                 | zinc finger protein 462                                                        | 1,26 | 0,0417 |
| 1446026_at   | NA                     | NA                                                                             | 1,26 | 0,0441 |
| 1455962_at   | Hhat                   | hedgehog acyltransferase                                                       | 1,26 | 0,0341 |
| 1415870_at   | Calu                   | calumenin                                                                      | 1,26 | 0,0299 |
| 1458849_at   | Asah2                  | N-acylsphingosine amidohydrolase 2                                             | 1,26 | 0,0158 |
| 1437280_s_at | Serbp1<br>LOC100048    | serpine1 mRNA binding protein 1                                                | 1,26 | 0,0048 |
| 1435519_at   | 397                    | similar to GTP-binding protein (smg p21B)                                      | 1,26 | 0,0407 |
| 1456476_at   | Atxn2l                 | ataxin 2-like                                                                  | 1,26 | 0,0308 |
| 1452362_at   | Trim16                 | tripartite motif-containing 16                                                 | 1,26 | 0,0138 |
| 1426165_a_at | Casp3                  | caspase 3                                                                      | 1,26 | 0,0470 |
| 1445079_at   | NA                     | NA                                                                             | 1,26 | 0,0467 |
| 1457416_at   | NA                     | NA                                                                             | 1,26 | 0,0111 |
| 1433674_a_at | Snord22                | small nucleolar RNA, C/D box 22                                                | 1,26 | 0,0232 |
| 1445101_at   | NA<br>2610002J02       | NA                                                                             | 1,26 | 0,0345 |
| 1431003_a_at | Rik                    | RIKEN cDNA 2610002J02 gene                                                     | 1,26 | 0,0413 |
| 1440209_at   | Mrz 01                 | membrane-associated ring finger (C3HC4) 1                                      | 1,26 | 0,0166 |
| 1421943_at   | Tgfa                   | transforming growth factor alpha                                               | 1,26 | 0,0389 |
| 1418067_at   | Cfl2                   | cofilin 2, muscle                                                              | 1,25 | 0,0098 |
| 1457804_at   | NA                     | NA                                                                             | 1,25 | 0,0323 |
| 1420570_x_at | Tcl1b3                 | T-cell leukemia/lymphoma 1B, 3                                                 | 1,25 | 0,0197 |
| 1442248_at   | NA                     | NA                                                                             | 1,25 | 0,0324 |
| 1438726_at   | Mical2                 | microtubule associated monooxygenase, calponin and LIM domain containing 2     | 1,25 | 0,0234 |
| 1453276_at   | Kif13b                 | kinesin family member 13B                                                      | 1,25 | 0,0411 |
| 1416234_at   | Lrrc59                 | leucine rich repeat containing 59                                              | 1,25 | 0,0373 |
| 1456694_x_at | Ptpn6                  | protein tyrosine phosphatase, non-receptor type 6                              | 1,25 | 0,0213 |
| 1448467_a_at | Ehbp111                | EH domain binding protein 1-like 1                                             | 1,25 | 0,0087 |
| 1448903_at   | Sep 15                 | selenoprotein                                                                  | 1,25 | 0,0080 |
| 1446512_at   | Zc3h15                 | zinc finger CCCH-type containing 15                                            | 1,25 | 0,0420 |
| 1454447_at   | 5830434F19             | RIKEN cDNA 5830434F19 gene                                                     | 1,25 | 0,0178 |

|              |                     |                                                                                                                                                |      |        |
|--------------|---------------------|------------------------------------------------------------------------------------------------------------------------------------------------|------|--------|
|              | Rik                 |                                                                                                                                                |      |        |
| 1448137_at   | Aldh7a1             | aldehyde dehydrogenase family 7, member A1                                                                                                     | 1,25 | 0,0388 |
| 1437683_x_at | Serf2               | small EDRK-rich factor 2                                                                                                                       | 1,25 | 0,0420 |
| 1422507_at   | Cstb                | cystatin B                                                                                                                                     | 1,25 | 0,0073 |
| 1459522_s_at | Gyg                 | glycogenin                                                                                                                                     | 1,25 | 0,0066 |
| 1447285_at   | NA                  | NA                                                                                                                                             | 1,25 | 0,0173 |
|              | A630033E0           |                                                                                                                                                |      |        |
| 1441792_at   | 8Rik                | RIKEN cDNA A630033E08 gene<br>par-6 (partitioning defective 6) homolog beta (C.<br>elegans)                                                    | 1,25 | 0,0048 |
| 1423174_a_at | Pard6b<br>9530002O2 |                                                                                                                                                | 1,25 | 0,0331 |
| 1433120_at   | 0Rik                | RIKEN cDNA 9530002O20 gene                                                                                                                     | 1,25 | 0,0437 |
| 1444696_at   | BC059841            | cDNA sequence BC059841<br>budding uninhibited by benzimidazoles 3 homolog (S.<br>cerevisiae)                                                   | 1,25 | 0,0411 |
| 1459918_at   | Bub3                | LSM4 homolog, U6 small nuclear RNA associated (S.<br>cerevisiae)                                                                               | 1,25 | 0,0447 |
| 1448622_at   | Lsm4                | cerevisiae)                                                                                                                                    | 1,25 | 0,0117 |
| 1423369_at   | Fmr1                | fragile X mental retardation syndrome 1 homolog                                                                                                | 1,25 | 0,0437 |
|              | 6720469N11          |                                                                                                                                                |      |        |
| 1434797_at   | Rik                 | RIKEN cDNA 6720469N11 gene                                                                                                                     | 1,25 | 0,0151 |
| 1449293_a_at | Skp2                | S-phase kinase-associated protein 2 (p45)                                                                                                      | 1,25 | 0,0335 |
| 1418073_at   | Acot9               | acyl-CoA thioesterase 9                                                                                                                        | 1,24 | 0,0079 |
| 1419115_at   | Alg14               | asparagine-linked glycosylation 14 homolog (yeast)<br>nuclear factor of kappa light polypeptide gene<br>enhancer in B-cells inhibitor, epsilon | 1,24 | 0,0146 |
| 1431843_a_at | Nfkbie              |                                                                                                                                                | 1,24 | 0,0214 |
| 1457769_at   | H60a                | histocompatibility 60a                                                                                                                         | 1,24 | 0,0111 |
| 1426570_a_at | Frk                 | fyn-related kinase                                                                                                                             | 1,24 | 0,0415 |
| 1448933_at   | Pcdhb17             | protocadherin beta 17                                                                                                                          | 1,24 | 0,0413 |
| 1437903_at   | Lox                 | lysyl oxidase                                                                                                                                  | 1,24 | 0,0414 |
| 1451037_at   | Ptpn9               | protein tyrosine phosphatase, non-receptor type 9<br>2-deoxyribose-5-phosphate aldolase homolog (C.<br>elegans)                                | 1,24 | 0,0333 |
| 1424047_at   | Dera                |                                                                                                                                                | 1,24 | 0,0242 |
| 1456111_at   | Fam55d              | family with sequence similarity 55, member D<br>tumor necrosis factor receptor superfamily, member<br>13b                                      | 1,24 | 0,0251 |
| 1423182_at   | Tnfrsf13b           |                                                                                                                                                | 1,24 | 0,0119 |
| 1447495_at   | Fank1<br>5730575I04 | fibronectin type 3 and ankyrin repeat domains 1                                                                                                | 1,24 | 0,0446 |
| 1454416_at   | Rik                 | RIKEN cDNA 5730575I04 gene                                                                                                                     | 1,24 | 0,0370 |
| 1457578_at   | NA                  | NA                                                                                                                                             | 1,24 | 0,0497 |
| 1434639_at   | Klhl29              | kelch-like 29 (Drosophila)                                                                                                                     | 1,24 | 0,0219 |
| 1416582_a_at | Bad                 | BCL2-associated agonist of cell death                                                                                                          | 1,24 | 0,0366 |
| 1416563_at   | Ctps                | cytidine 5'-triphosphate synthase                                                                                                              | 1,24 | 0,0313 |
| 1420197_at   | Gadd45b             | growth arrest and DNA-damage-inducible 45 beta<br>phosphoinositide-3-kinase, catalytic, gamma<br>polypeptide                                   | 1,24 | 0,0405 |
| 1422707_at   | Pik3cg              |                                                                                                                                                | 1,24 | 0,0164 |
| 1457827_at   | Arsj                | arylsulfatase J                                                                                                                                | 1,24 | 0,0145 |
| 1447274_at   | NA                  | NA                                                                                                                                             | 1,24 | 0,0225 |
|              | 0610010O1           |                                                                                                                                                |      |        |
| 1427878_at   | 2Rik                | RIKEN cDNA 0610010O12 gene                                                                                                                     | 1,24 | 0,0288 |
| 1457308_at   | NA                  | NA                                                                                                                                             | 1,24 | 0,0286 |
| 1437466_at   | Alcam               | activated leukocyte cell adhesion molecule                                                                                                     | 1,24 | 0,0272 |
| 1438137_at   | NA                  | NA                                                                                                                                             | 1,24 | 0,0365 |
| 1422922_at   | Recq14              | RecQ protein-like 4                                                                                                                            | 1,24 | 0,0226 |
| 1449368_at   | Dcn                 | decorin                                                                                                                                        | 1,23 | 0,0173 |
| 1459298_at   | Aebp1<br>C030027H1  | AE binding protein 1                                                                                                                           | 1,23 | 0,0454 |
| 1442175_at   | 4Rik                | RIKEN cDNA C030027H14 gene                                                                                                                     | 1,23 | 0,0358 |
| 1435665_at   | AI451617            | expressed sequence AI451617                                                                                                                    | 1,23 | 0,0100 |

|              |           |                                                                                                   |      |        |
|--------------|-----------|---------------------------------------------------------------------------------------------------|------|--------|
| 1420502_at   | Sat1      | spermidine/spermine N1-acetyl transferase 1                                                       | 1,23 | 0,0376 |
| 1423654_a_at | Rnf4      | ring finger protein 4                                                                             | 1,23 | 0,0385 |
| 1438629_x_at | Grn       | granulin                                                                                          | 1,23 | 0,0393 |
| 1432331_a_at | Prrx2     | paired related homeobox 2                                                                         | 1,23 | 0,0449 |
| 1418097_a_at | Crlf2     | cytokine receptor-like factor 2                                                                   | 1,23 | 0,0400 |
| 1449821_a_at | Memo1     | mediator of cell motility 1                                                                       | 1,23 | 0,0047 |
| 1422259_a_at | Ccr5      | chemokine (C-C motif) receptor 5                                                                  | 1,23 | 0,0493 |
| 1428488_at   | Pigk      | phosphatidylinositol glycan anchor biosynthesis, class K                                          | 1,23 | 0,0244 |
| 1455921_at   | Ttc30a2   | tetratricopeptide repeat domain 30A2                                                              | 1,23 | 0,0397 |
| 1460118_at   | NA        | NA                                                                                                | 1,23 | 0,0385 |
| 1426825_at   | Fmnl3     | formin-like 3                                                                                     | 1,23 | 0,0073 |
| 1436117_at   | ORik      | RIKEN cDNA A830010M20 gene                                                                        | 1,23 | 0,0156 |
| 1439545_at   | NA        | NA                                                                                                | 1,23 | 0,0415 |
| 1420563_at   | Gria3     | glutamate receptor, ionotropic, AMPA3 (alpha 3)                                                   | 1,23 | 0,0470 |
| 1429783_at   | Pdlim5    | PDZ and LIM domain 5                                                                              | 1,23 | 0,0051 |
| 1456344_at   | Tnc       | tenascin C                                                                                        | 1,23 | 0,0352 |
| 1417825_at   | Esd       | esterase D/formylglutathione hydrolase                                                            | 1,23 | 0,0055 |
| 1450697_at   | Slc30a7   | solute carrier family 30 (zinc transporter), member 7                                             | 1,23 | 0,0303 |
| 1438753_at   | NA        | NA                                                                                                | 1,22 | 0,0381 |
| 1434991_at   | Fbxw17    | F-box and WD-40 domain protein 17                                                                 | 1,22 | 0,0302 |
| 1436945_x_at | 432       | similar to Stromal interaction molecule 1                                                         | 1,22 | 0,0381 |
| 1418638_at   | H2-DMb1   | histocompatibility 2, class II, locus Mb1                                                         | 1,22 | 0,0179 |
| 1422553_at   | Pten      | phosphatase and tensin homolog                                                                    | 1,22 | 0,0166 |
| 1436928_s_at | Cenpo     | centromere protein O                                                                              | 1,22 | 0,0087 |
| 1441657_at   | NA        | NA                                                                                                | 1,22 | 0,0338 |
| 1417652_a_at | Tbca      | tubulin cofactor A                                                                                | 1,22 | 0,0126 |
| 1454343_at   | 3Rik      | RIKEN cDNA 6430710M23 gene                                                                        | 1,22 | 0,0274 |
| 1421564_at   | Serpina3c | serine (or cysteine) peptidase inhibitor, clade A, member 3C                                      | 1,22 | 0,0374 |
| 1437155_a_at | Wwtr1     | WW domain containing transcription regulator 1                                                    | 1,22 | 0,0190 |
| 1458507_at   | Rnf216    | ring finger protein 216                                                                           | 1,22 | 0,0449 |
| 1421707_at   | Tmc2      | transmembrane channel-like gene family 2                                                          | 1,22 | 0,0467 |
| 1425248_a_at | Tyro3     | TYRO3 protein tyrosine kinase 3                                                                   | 1,22 | 0,0112 |
| 1447797_x_at | Pih1d1    | PIH1 domain containing 1                                                                          | 1,22 | 0,0475 |
| 1454639_x_at | Rpl41     | ribosomal protein L41                                                                             | 1,22 | 0,0086 |
| 1447813_x_at | Sla       | src-like adaptor                                                                                  | 1,22 | 0,0256 |
| 1443199_at   | Lrch3     | leucine-rich repeats and calponin homology (CH) domain containing 3                               | 1,22 | 0,0482 |
| 1442540_at   | C77609    | expressed sequence C77609                                                                         | 1,22 | 0,0471 |
| 1460292_a_at | Smarca1   | SWI/SNF related, matrix associated, actin dependent regulator of chromatin, subfamily a, member 1 | 1,22 | 0,0220 |
| 1449750_at   | AA407331  | expressed sequence AA407331                                                                       | 1,22 | 0,0484 |
| 1446791_at   | NA        | NA                                                                                                | 1,22 | 0,0488 |
| 1424304_at   | Tpcn2     | two pore segment channel 2                                                                        | 1,22 | 0,0481 |
| 1435878_at   | Stk38l    | serine/threonine kinase 38 like                                                                   | 1,22 | 0,0147 |
| 1441555_at   | NA        | NA                                                                                                | 1,22 | 0,0379 |
| 1443542_at   | NA        | NA                                                                                                | 1,22 | 0,0497 |
| 1450595_at   | V1rc1     | vomer nasal 1 receptor, C1                                                                        | 1,21 | 0,0461 |
| 1416087_at   | Ap1s1     | adaptor protein complex AP-1, sigma 1                                                             | 1,21 | 0,0365 |
| 1456652_at   | Dtl       | denticleless homolog (Drosophila)                                                                 | 1,21 | 0,0465 |
| 1416995_at   | Pacsin3   | protein kinase C and casein kinase substrate in neurons 3                                         | 1,21 | 0,0445 |
| 1444547_at   | NA        | NA                                                                                                | 1,21 | 0,0318 |



|              |            |                                                                                     |      |        |
|--------------|------------|-------------------------------------------------------------------------------------|------|--------|
| 1420361_at   | Slc11a1    | solute carrier family 11 (proton-coupled divalent metal ion transporters), member 1 | 1,21 | 0,0247 |
| 1423732_at   | Tram1      | translocating chain-associating membrane protein 1                                  | 1,21 | 0,0466 |
| 1443136_at   | LOC432459  | hypothetical gene supported by AK082906                                             | 1,21 | 0,0369 |
| 1443141_at   | NA         | NA                                                                                  | 1,21 | 0,0413 |
|              | 2310058F05 |                                                                                     |      |        |
| 1432794_at   | Rik        | RIKEN cDNA 2310058F05 gene                                                          | 1,21 | 0,0175 |
| 1433846_s_at | Fam175b    | family with sequence similarity 175, member B                                       | 1,21 | 0,0350 |
| 1447120_at   | NA         | NA                                                                                  | 1,21 | 0,0293 |
| 1446356_at   | NA         | NA                                                                                  | 1,21 | 0,0263 |
| 1421930_at   | Icos       | inducible T-cell co-stimulator                                                      | 1,21 | 0,0274 |
| 1415804_at   | Cx3cl1     | chemokine (C-X3-C motif) ligand 1                                                   | 1,21 | 0,0341 |
| 1458276_x_at | Cit        | citron                                                                              | 1,21 | 0,0413 |
| 1418406_at   | Pde8a      | phosphodiesterase 8A                                                                | 1,21 | 0,0270 |
|              |            | ubiquitin-conjugating enzyme E2D 3 (UBC4/5 homolog, yeast)                          |      |        |
| 1423113_a_at | Ube2d3     | homolog, yeast)                                                                     | 1,21 | 0,0433 |
| 1437274_at   | Copa       | coatamer protein complex subunit alpha                                              | 1,21 | 0,0304 |
| 1427023_at   | Phyhipl    | phytanoyl-CoA hydroxylase interacting protein-like                                  | 1,21 | 0,0402 |
| 1448679_at   | Hyal2      | hyaluronoglucosaminidase 2                                                          | 1,21 | 0,0363 |
| 1441675_at   | NA         | NA                                                                                  | 1,21 | 0,0386 |
| 1423955_a_at | Lass2      | LAG1 homolog, ceramide synthase 2                                                   | 1,20 | 0,0354 |
| 1455955_s_at | Snx17      | sorting nexin 17                                                                    | 1,20 | 0,0470 |
|              |            | RNA binding motif, single stranded interacting protein 1                            |      |        |
| 1434005_at   | Rbms1      | 1                                                                                   | 1,20 | 0,0462 |
| 1436260_at   | NA         | NA                                                                                  | 1,20 | 0,0270 |
| 1448714_at   | Rngtt      | RNA guanylyltransferase and 5'-phosphatase                                          | 1,20 | 0,0205 |
| 1457209_at   | Ddhd2      | DDHD domain containing 2                                                            | 1,20 | 0,0418 |
| 1438833_at   | Casc5      | cancer susceptibility candidate 5                                                   | 1,20 | 0,0405 |
|              | D16Ert472  |                                                                                     |      |        |
| 1451466_at   | e          | DNA segment, Chr 16, ERATO Doi 472, expressed                                       | 1,20 | 0,0461 |
| 1446613_at   | NA         | NA                                                                                  | 1,20 | 0,0267 |
| 1456567_x_at | Grn        | granulin                                                                            | 1,20 | 0,0323 |
|              |            | Parkinson disease (autosomal recessive, early onset)                                |      |        |
| 1416526_a_at | Park7      | 7                                                                                   | 1,20 | 0,0353 |
| 1453833_a_at | Rnaseh1    | ribonuclease H1                                                                     | 1,20 | 0,0204 |
| 1452091_a_at | Rbm28      | RNA binding motif protein 28                                                        | 1,20 | 0,0441 |
| 1450481_at   | Mybl1      | myeloblastosis oncogene-like 1                                                      | 1,20 | 0,0380 |
| 1444138_at   | Cyp2r1     | cytochrome P450, family 2, subfamily r, polypeptide 1                               | 1,20 | 0,0493 |
| 1422932_a_at | Vav1       | vav 1 oncogene                                                                      | 1,20 | 0,0244 |
| 1443524_x_at | Bcl10      | B-cell leukemia/lymphoma 10                                                         | 1,20 | 0,0461 |
| 1452196_a_at | Nckap1     | NCK-associated protein 1                                                            | 1,20 | 0,0189 |
| 1459886_at   | NA         | NA                                                                                  | 1,20 | 0,0470 |
| 1435739_at   | Lats1      | large tumor suppressor                                                              | 1,20 | 0,0479 |
|              | D14Ert449  |                                                                                     |      |        |
| 1428738_a_at | e          | DNA segment, Chr 14, ERATO Doi 449, expressed                                       | 1,20 | 0,0498 |
|              |            | proteasome (prosome, macropain) 26S subunit, non-ATPase, 8                          |      |        |
| 1423296_at   | Psm8       | ATPase, 8                                                                           | 1,19 | 0,0117 |
| 1426299_at   | Snx20      | sorting nexin 20                                                                    | 1,19 | 0,0494 |
|              |            | KDEL (Lys-Asp-Glu-Leu) endoplasmic reticulum protein retention receptor 2           |      |        |
| 1417204_at   | Kdelr2     | protein retention receptor 2                                                        | 1,19 | 0,0437 |
|              | A330048O0  |                                                                                     |      |        |
| 1458416_at   | 9Rik       | RIKEN cDNA A330048O09 gene                                                          | 1,19 | 0,0283 |
| 1422881_s_at | Sypl       | synaptophysin-like protein                                                          | 1,19 | 0,0283 |
| 1431597_a_at | Nrip3      | nuclear receptor interacting protein 3                                              | 1,19 | 0,0379 |
| 1427445_a_at | Ttn        | titin                                                                               | 1,19 | 0,0095 |
| 1427515_at   | Pion       | pigeon homolog (Drosophila)                                                         | 1,19 | 0,0217 |
| 1441448_at   | Pum2       | pumilio 2 (Drosophila)                                                              | 1,19 | 0,0181 |

|              |            |                                                       |      |        |
|--------------|------------|-------------------------------------------------------|------|--------|
| 1432189_a_at | Sox5       | SRY-box containing gene 5                             | 1,19 | 0,0418 |
| 1426922_s_at | Agfg1      | ArfGAP with FG repeats 1                              | 1,19 | 0,0417 |
| 1459236_at   | AU022436   | expressed sequence AU022436                           | 1,19 | 0,0203 |
|              | 1700029J11 |                                                       |      |        |
| 1429544_at   | Rik        | RIKEN cDNA 1700029J11 gene                            | 1,19 | 0,0386 |
|              | 2410089E03 |                                                       |      |        |
| 1443422_at   | Rik        | RIKEN cDNA 2410089E03 gene                            | 1,19 | 0,0425 |
| 1452566_at   | NA         | NA                                                    | 1,19 | 0,0466 |
| 1440019_at   | NA         | NA                                                    | 1,19 | 0,0388 |
| 1419545_a_at | Atp6v1c1   | ATPase, H+ transporting, lysosomal V1 subunit C1      | 1,19 | 0,0335 |
|              | 6330442E10 |                                                       |      |        |
| 1447716_x_at | Rik        | RIKEN cDNA 6330442E10 gene                            | 1,18 | 0,0384 |
| 1428094_at   | Lamp2      | lysosomal-associated membrane protein 2               | 1,18 | 0,0084 |
| 1451101_a_at | Rps28      | ribosomal protein S28                                 | 1,18 | 0,0315 |
| 1425841_at   | Slc26a7    | solute carrier family 26, member 7                    | 1,18 | 0,0306 |
| 1459418_at   | NA         | NA                                                    | 1,18 | 0,0306 |
|              | 5530601H04 |                                                       |      |        |
| 1438893_at   | Rik        | RIKEN cDNA 5530601H04 gene                            | 1,18 | 0,0240 |
| 1435615_at   | Zfp365     | zinc finger protein 365                               | 1,18 | 0,0361 |
| 1423917_a_at | Ctnn       | cortactin                                             | 1,18 | 0,0241 |
| 1436867_at   | Srl        | sarcalumenin                                          | 1,18 | 0,0383 |
| 1451973_at   | Uba5       | ubiquitin-like modifier activating enzyme 5           | 1,17 | 0,0234 |
| 1415962_at   | Eif3h      | eukaryotic translation initiation factor 3, subunit H | 1,17 | 0,0398 |
| 1431699_at   | Fut4-ps1   | fucosyltransferase 4, pseudogene 1                    | 1,17 | 0,0353 |
|              | E130016E0  |                                                       |      |        |
| 1456674_at   | 3Rik       | RIKEN cDNA E130016E03 gene                            | 1,17 | 0,0449 |
| 1435029_at   | NA         | NA                                                    | 1,17 | 0,0470 |
| 1455964_at   | Crkrs      | CDC2-related kinase, arginine/serine-rich             | 1,17 | 0,0490 |
| 1416025_at   | Fgg        | fibrinogen, gamma polypeptide                         | 1,17 | 0,0381 |
|              | 5830426K05 |                                                       |      |        |
| 1432807_at   | Rik        | RIKEN cDNA 5830426K05 gene                            | 1,17 | 0,0339 |
| 1445647_at   | Al447881   | expressed sequence Al447881                           | 1,17 | 0,0377 |
| 1420471_at   | Hcrt       | hypocretin                                            | 1,16 | 0,0379 |
| 1440082_at   | Ptk2       | PTK2 protein tyrosine kinase 2                        | 1,16 | 0,0214 |
|              |            | protein phosphatase 1, regulatory (inhibitor) subunit |      |        |
| 1456807_at   | Ppp1r3e    | 3E                                                    | 1,16 | 0,0417 |
| 1434595_at   | Trim9      | tripartite motif-containing 9                         | 1,16 | 0,0270 |
| 1424741_s_at | Creb3      | cAMP responsive element binding protein 3             | 1,16 | 0,0411 |
|              | 2900073G1  |                                                       |      |        |
| 1420820_at   | 5Rik       | RIKEN cDNA 2900073G15 gene                            | 1,15 | 0,0417 |
| 1440906_at   | NA         | NA                                                    | 1,14 | 0,0309 |
| 1422846_at   | Rbp2       | retinol binding protein 2, cellular                   | 1,14 | 0,0370 |
| 1447123_at   | NA         | NA                                                    | 1,13 | 0,0437 |

## Downregulated in TAC vs. Sham

| Affymetrix probe set identification | Gene symbol       | Gene name                                                    | Fold change | Adjusted P value |
|-------------------------------------|-------------------|--------------------------------------------------------------|-------------|------------------|
| 1434672_at                          | Gpr22             | G protein-coupled receptor 22                                | 0,17        | 0,0001           |
| 1434673_at                          | Gpr22             | G protein-coupled receptor 22                                | 0,21        | 0,0009           |
| 1445764_at                          | NA                | NA                                                           | 0,24        | 0,0011           |
| 1426672_at                          | Ano10             | anoctamin 10                                                 | 0,28        | 0,0008           |
| 1418219_at                          | Il15              | interleukin 15                                               | 0,28        | 0,0000           |
| 1444153_at                          | NA                | NA                                                           | 0,29        | 0,0003           |
| 1444025_at                          | Kcnj3             | potassium inwardly-rectifying channel, subfamily J, member 3 | 0,30        | 0,0003           |
| 1454850_at                          | Tbc1d10c          | TBC1 domain family, member 10c                               | 0,30        | 0,0087           |
| 1439801_at                          | Sunc1             | Sad1 and UNC84 domain containing 1                           | 0,31        | 0,0177           |
| 1423183_at                          | Lgi1              | leucine-rich repeat LGI family, member 1                     | 0,31        | 0,0011           |
| 1435370_a_at                        | Ces3              | carboxylesterase 3                                           | 0,32        | 0,0006           |
| 1447830_s_at                        | Rgs2              | regulator of G-protein signaling 2                           | 0,33        | 0,0000           |
| 1449081_at                          | Ces3              | carboxylesterase 3                                           | 0,34        | 0,0002           |
| 1423085_at                          | Efnb3             | ephrin B3                                                    | 0,34        | 0,0000           |
| 1427213_at                          | Pfkfb1            | 6-phosphofructo-2-kinase/fructose-2,6-biphosphatase 1        | 0,35        | 0,0001           |
| 1418174_at                          | Dbp               | D site albumin promoter binding protein                      | 0,35        | 0,0415           |
| 1425645_s_at                        | Cyp2b10           | cytochrome P450, family 2, subfamily b, polypeptide 10       | 0,37        | 0,0026           |
| 1436833_x_at                        | Ttl1              | tubulin tyrosine ligase-like 1                               | 0,37        | 0,0424           |
| 1422651_at                          | Adipoq            | adiponectin, C1Q and collagen domain containing              | 0,37        | 0,0277           |
| 1455374_at                          | Kcnj3<br>1110034G | potassium inwardly-rectifying channel, subfamily J, member 3 | 0,38        | 0,0000           |
| 1452888_at                          | 24Rik             | RIKEN cDNA 1110034G24 gene                                   | 0,39        | 0,0069           |
| 1423436_at                          | Gsta3             | glutathione S-transferase, alpha 3                           | 0,39        | 0,0403           |
| 1434647_at                          | Egflam            | EGF-like, fibronectin type III and laminin G domains         | 0,39        | 0,0001           |
| 1452476_at                          | Cacnb2            | calcium channel, voltage-dependent, beta 2 subunit           | 0,40        | 0,0109           |
| 1438211_s_at                        | Dbp               | D site albumin promoter binding protein                      | 0,40        | 0,0304           |
| 1425164_a_at                        | Phkg1             | phosphorylase kinase gamma 1                                 | 0,40        | 0,0006           |
| 1418697_at                          | Inmt              | indolethylamine N-methyltransferase                          | 0,40        | 0,0177           |
| 1449407_at                          | Ift81             | intraflagellar transport 81 homolog (Chlamydomonas)          | 0,40        | 0,0001           |
| 1419551_s_at                        | Stk39<br>1110034G | serine/threonine kinase 39, STE20/SPS1 homolog (yeast)       | 0,40        | 0,0002           |
| 1437617_x_at                        | 24Rik             | RIKEN cDNA 1110034G24 gene                                   | 0,41        | 0,0025           |
| 1458081_at                          | NA                | NA                                                           | 0,41        | 0,0402           |
| 1422257_s_at                        | Cyp2b10           | cytochrome P450, family 2, subfamily b, polypeptide 10       | 0,41        | 0,0059           |
| 1452086_at                          | Trmt5             | TRM5 tRNA methyltransferase 5 homolog (S. cerevisiae)        | 0,41        | 0,0000           |
| 1438217_at                          | A2bp1             | ataxin 2 binding protein 1                                   | 0,41        | 0,0017           |
| 1429021_at                          | Epha4             | Eph receptor A4                                              | 0,42        | 0,0001           |
| 1417382_at                          | Entpd5            | ectonucleoside triphosphate diphosphohydrolase 5             | 0,42        | 0,0003           |
| 1451204_at                          | Scara5            | scavenger receptor class A, member 5 (putative)              | 0,42        | 0,0004           |
| 1428892_at                          | Ppil1             | peptidylprolyl isomerase (cyclophilin)-like 1                | 0,42        | 0,0001           |
| 1417814_at                          | Pla2g5            | phospholipase A2, group V                                    | 0,43        | 0,0006           |
| 1455358_at                          | A2bp1             | ataxin 2 binding protein 1                                   | 0,43        | 0,0100           |
| 1449015_at                          | Retnla            | resistin like alpha                                          | 0,43        | 0,0134           |
| 1421928_at                          | Epha4             | Eph receptor A4                                              | 0,43        | 0,0037           |
| 1434735_at                          | Hlf               | hepatic leukemia factor                                      | 0,44        | 0,0026           |
| 1422677_at                          | Dgat2             | diacylglycerol O-acyltransferase 2                           | 0,44        | 0,0209           |

|              |                   |                                                                                                  |      |        |
|--------------|-------------------|--------------------------------------------------------------------------------------------------|------|--------|
| 1458040_at   | NA                | NA                                                                                               | 0,44 | 0,0169 |
| 1419286_s_at | Ift81             | intraflagellar transport 81 homolog (Chlamydomonas)                                              | 0,44 | 0,0001 |
| 1456401_at   | Cacnb2            | calcium channel, voltage-dependent, beta 2 subunit                                               | 0,44 | 0,0008 |
| 1434736_at   | Hlf               | hepatic leukemia factor                                                                          | 0,44 | 0,0034 |
| 1448130_at   | Fdft1             | farnesyl diphosphate farnesyl transferase 1                                                      | 0,45 | 0,0001 |
| 1435371_x_at | Ces3              | carboxylesterase 3                                                                               | 0,45 | 0,0068 |
| 1439066_at   | Angpt1            | angiopoietin 1                                                                                   | 0,45 | 0,0399 |
| 1428812_at   | 1700040L<br>02Rik | RIKEN cDNA 1700040L02 gene<br>ATPase, Ca <sup>++</sup> transporting, cardiac muscle, slow twitch | 0,45 | 0,0421 |
| 1443551_at   | Atp2a2            | 2                                                                                                | 0,45 | 0,0152 |
| 1417383_at   | Entpd5            | ectonucleoside triphosphate diphosphohydrolase 5                                                 | 0,45 | 0,0006 |
| 1418314_a_at | A2bp1             | ataxin 2 binding protein 1                                                                       | 0,45 | 0,0031 |
| 1441937_s_at | LOC10004<br>7214  | similar to PTEN induced putative kinase 1                                                        | 0,46 | 0,0202 |
| 1427038_at   | Penk1             | preproenkephalin 1                                                                               | 0,46 | 0,0188 |
| 1441867_x_at | 4930534B<br>04Rik | RIKEN cDNA 4930534B04 gene                                                                       | 0,46 | 0,0140 |
| 1417765_a_at | Amy1              | amylase 1, salivary                                                                              | 0,46 | 0,0076 |
| 1422315_x_at | Phkg1             | phosphorylase kinase gamma 1<br>serine/threonine kinase 39, STE20/SPS1 homolog                   | 0,46 | 0,0014 |
| 1419550_a_at | Stk39             | (yeast)                                                                                          | 0,46 | 0,0082 |
| 1420638_at   | Prps2             | phosphoribosyl pyrophosphate synthetase 2                                                        | 0,46 | 0,0155 |
| 1437953_at   | Prei4             | preimplantation protein 4                                                                        | 0,46 | 0,0132 |
| 1439143_at   | A930018M<br>24Rik | RIKEN cDNA A930018M24 gene                                                                       | 0,47 | 0,0161 |
| 1419340_at   | Mov10l1           | Moloney leukemia virus 10-like 1                                                                 | 0,47 | 0,0009 |
| 1453355_at   | Wnk2              | WNK lysine deficient protein kinase 2                                                            | 0,47 | 0,0001 |
| 1421468_at   | Kcnj3             | potassium inwardly-rectifying channel, subfamily J,<br>member 3                                  | 0,47 | 0,0008 |
| 1417384_at   | Entpd5            | ectonucleoside triphosphate diphosphohydrolase 5                                                 | 0,47 | 0,0011 |
| 1450699_at   | Selenbp1          | selenium binding protein 1                                                                       | 0,48 | 0,0346 |
| 1417168_a_at | Usp2              | ubiquitin specific peptidase 2                                                                   | 0,48 | 0,0023 |
| 1456824_at   | Zfp612            | zinc finger protein 612                                                                          | 0,48 | 0,0016 |
| 1448956_at   | Stard10           | START domain containing 10                                                                       | 0,48 | 0,0015 |
| 1419248_at   | Rgs2              | regulator of G-protein signaling 2                                                               | 0,48 | 0,0062 |
| 1424531_a_at | Tcea3             | transcription elongation factor A (SII), 3                                                       | 0,48 | 0,0001 |
| 1429228_at   | 4930534B<br>04Rik | RIKEN cDNA 4930534B04 gene                                                                       | 0,48 | 0,0220 |
| 1447462_at   | D7Wsu13<br>0e     | DNA segment, Chr 7, Wayne State University 130,<br>expressed                                     | 0,48 | 0,0060 |
| 1435751_at   | Abcc9             | ATP-binding cassette, sub-family C (CFTR/MRP),<br>member 9                                       | 0,48 | 0,0008 |
| 1451606_at   | A530016L<br>24Rik | RIKEN cDNA A530016L24 gene                                                                       | 0,48 | 0,0150 |
| 1416225_at   | Adh1              | alcohol dehydrogenase 1 (class I)<br>ATP-binding cassette, sub-family C (CFTR/MRP),              | 0,48 | 0,0158 |
| 1457066_at   | Abcc8             | member 8<br>potassium inwardly-rectifying channel, subfamily J,                                  | 0,49 | 0,0276 |
| 1441590_at   | Kcnj5             | member 5                                                                                         | 0,49 | 0,0324 |
| 1423577_at   | Ankrd32           | ankyrin repeat domain 32                                                                         | 0,49 | 0,0000 |
| 1455475_at   | 3110057O<br>12Rik | RIKEN cDNA 3110057O12 gene                                                                       | 0,49 | 0,0070 |
| 1427736_a_at | Ccr12             | chemokine (C-C motif) receptor-like 2<br>ATP-binding cassette, sub-family C (CFTR/MRP),          | 0,49 | 0,0111 |
| 1420408_a_at | Abcc9             | member 9                                                                                         | 0,49 | 0,0009 |
| 1422678_at   | Dgat2             | diacylglycerol O-acyltransferase 2                                                               | 0,49 | 0,0002 |
| 1448607_at   | Nampt             | nicotinamide phosphoribosyltransferase                                                           | 0,49 | 0,0289 |

|              |          |                                                                                                |      |        |
|--------------|----------|------------------------------------------------------------------------------------------------|------|--------|
| 1434354_at   | Maob     | monoamine oxidase B                                                                            | 0,49 | 0,0003 |
| 1435991_at   | Nr3c2    | nuclear receptor subfamily 3, group C, member 2                                                | 0,49 | 0,0018 |
| 1418186_at   | Gstt1    | glutathione S-transferase, theta 1                                                             | 0,50 | 0,0003 |
| 1438322_x_at | Fdft1    | farnesyl diphosphate farnesyl transferase 1                                                    | 0,50 | 0,0014 |
| 1458324_x_at | NA       | NA                                                                                             | 0,50 | 0,0027 |
| 1417702_a_at | Hnmt     | histamine N-methyltransferase                                                                  | 0,50 | 0,0237 |
|              | D630045  |                                                                                                |      |        |
| 1436619_at   | M09Rik   | RIKEN cDNA D630045M09 gene                                                                     | 0,50 | 0,0048 |
| 1434100_x_at | NA       | NA                                                                                             | 0,50 | 0,0316 |
| 1421087_at   | Per3     | period homolog 3 (Drosophila)                                                                  | 0,50 | 0,0477 |
| 1448825_at   | Pdk2     | pyruvate dehydrogenase kinase, isoenzyme 2                                                     | 0,50 | 0,0004 |
|              | LOC10004 |                                                                                                |      |        |
| 1436041_at   | 6086     | similar to dHand protein                                                                       | 0,50 | 0,0052 |
| 1435658_at   | Slc27a1  | solute carrier family 27 (fatty acid transporter), member 1                                    | 0,50 | 0,0006 |
| 1428513_at   | Calcoco1 | calcium binding and coiled coil domain 1                                                       | 0,50 | 0,0013 |
|              | A530016L |                                                                                                |      |        |
| 1438734_at   | 24Rik    | RIKEN cDNA A530016L24 gene                                                                     | 0,50 | 0,0332 |
| 1451229_at   | Hdac11   | histone deacetylase 11                                                                         | 0,50 | 0,0049 |
| 1435188_at   | Gm129    | gene model 129, (NCBI)                                                                         | 0,50 | 0,0436 |
| 1421456_at   | P2ry1    | purinergic receptor P2Y, G-protein coupled 1                                                   | 0,51 | 0,0412 |
| 1435254_at   | Plxnb1   | plexin B1                                                                                      | 0,51 | 0,0004 |
| 1417580_s_at | Selenbp2 | selenium binding protein 2                                                                     | 0,51 | 0,0447 |
| 1439352_at   | Trim7    | tripartite motif-containing 7                                                                  | 0,51 | 0,0001 |
|              |          | solute carrier family 22 (organic cation transporter), member 3                                |      |        |
| 1420444_at   | Slc22a3  |                                                                                                | 0,51 | 0,0031 |
| 1427104_at   | Zfp612   | zinc finger protein 612                                                                        | 0,51 | 0,0001 |
| 1452973_at   | Ppm1k    | protein phosphatase 1K (PP2C domain containing)                                                | 0,51 | 0,0002 |
|              | 2310050B |                                                                                                |      |        |
| 1430787_at   | 05Rik    | RIKEN cDNA 2310050B05 gene                                                                     | 0,51 | 0,0420 |
| 1434099_at   | NA       | NA                                                                                             | 0,51 | 0,0375 |
|              | E130119H |                                                                                                |      |        |
| 1460518_at   | 09Rik    | RIKEN cDNA E130119H09 gene                                                                     | 0,51 | 0,0073 |
| 1416950_at   | Tnfaip8  | tumor necrosis factor, alpha-induced protein 8                                                 | 0,51 | 0,0159 |
| 1422183_a_at | Adra1b   | adrenergic receptor, alpha 1b                                                                  | 0,51 | 0,0116 |
| 1460081_at   | Syt7     | synaptotagmin VII                                                                              | 0,51 | 0,0008 |
| 1455372_at   | Cpeb3    | cytoplasmic polyadenylation element binding protein 3                                          | 0,51 | 0,0080 |
| 1435694_at   | Arhgap26 | Rho GTPase activating protein 26                                                               | 0,51 | 0,0024 |
| 1419247_at   | Rgs2     | regulator of G-protein signaling 2                                                             | 0,52 | 0,0213 |
| 1419072_at   | Gstm7    | glutathione S-transferase, mu 7                                                                | 0,52 | 0,0005 |
| 1424737_at   | Thrsp    | thyroid hormone responsive SPOT14 homolog (Rattus)                                             | 0,52 | 0,0013 |
| 1435285_at   | Mpped2   | metallophosphoesterase domain containing 2                                                     | 0,52 | 0,0018 |
|              |          | solute carrier family 16 (monocarboxylic acid transporters), member 7                          |      |        |
| 1448502_at   | Slc16a7  |                                                                                                | 0,52 | 0,0288 |
| 1451765_a_at | Entpd5   | ectonucleoside triphosphate diphosphohydrolase 5                                               | 0,52 | 0,0003 |
|              |          | synapse defective 1, Rho GTPase, homolog 2 (C. elegans)                                        |      |        |
| 1437424_at   | Syde2    |                                                                                                | 0,52 | 0,0037 |
|              |          | homocysteine-inducible, endoplasmic reticulum stress-inducible, ubiquitin-like domain member 1 |      |        |
| 1435626_a_at | Herpud1  |                                                                                                | 0,52 | 0,0068 |
| 1456911_at   | Clasp2   | CLIP associating protein 2                                                                     | 0,52 | 0,0290 |
| 1422811_at   | Slc27a1  | solute carrier family 27 (fatty acid transporter), member 1                                    | 0,52 | 0,0037 |
| 1439301_at   | NA       | NA                                                                                             | 0,52 | 0,0122 |
| 1424669_at   | Zfyve21  | zinc finger, FYVE domain containing 21                                                         | 0,52 | 0,0007 |
| 1431074_a_at | Pitpnc1  | phosphatidylinositol transfer protein, cytoplasmic 1                                           | 0,52 | 0,0034 |
| 1440435_at   | Ky       | kyphoscoliosis peptidase                                                                       | 0,52 | 0,0025 |
| 1447693_s_at | Neo1     | neogenin                                                                                       | 0,52 | 0,0009 |
| 1448949_at   | Car4     | carbonic anhydrase 4                                                                           | 0,52 | 0,0083 |
| 1452940_x_at | Pitpnc1  | phosphatidylinositol transfer protein, cytoplasmic 1                                           | 0,52 | 0,0045 |

|              |           |                                                                      |      |        |
|--------------|-----------|----------------------------------------------------------------------|------|--------|
|              | 9030617O  |                                                                      |      |        |
| 1424226_at   | 03Rik     | RIKEN cDNA 9030617O03 gene                                           | 0,53 | 0,0012 |
| 1437765_at   | Cpeb3     | cytoplasmic polyadenylation element binding protein 3                | 0,53 | 0,0101 |
| 1437243_at   | D2hgdh    | D-2-hydroxyglutarate dehydrogenase                                   | 0,53 | 0,0161 |
| 1440537_at   | Kcnv2     | potassium channel, subfamily V, member 2                             | 0,53 | 0,0010 |
|              | 2810416G  |                                                                      |      |        |
| 1431220_at   | 20Rik     | RIKEN cDNA 2810416G20 gene                                           | 0,53 | 0,0028 |
| 1441940_x_at | Klhdc8a   | kelch domain containing 8A                                           | 0,53 | 0,0255 |
| 1423086_at   | Npc1      | Niemann Pick type C1                                                 | 0,53 | 0,0065 |
| 1454693_at   | Hdac4     | histone deacetylase 4                                                | 0,53 | 0,0010 |
| 1460281_at   | Asb15     | ankyrin repeat and SOCS box-containing 15                            | 0,53 | 0,0303 |
|              |           | solute carrier family 36 (proton/amino acid symporter), member 2     |      |        |
| 1436521_at   | Slc36a2   |                                                                      | 0,53 | 0,0102 |
| 1426584_a_at | Sord      | sorbitol dehydrogenase                                               | 0,53 | 0,0001 |
| 1444504_at   | Dhrs7c    | dehydrogenase/reductase (SDR family) member 7C                       | 0,53 | 0,0001 |
| 1460061_at   | NA        | NA                                                                   | 0,53 | 0,0312 |
| 1420543_at   | Dnajc28   | DnaJ (Hsp40) homolog, subfamily C, member 28                         | 0,53 | 0,0171 |
|              |           | ATPase, Ca <sup>++</sup> transporting, cardiac muscle, slow twitch 2 |      |        |
| 1437797_at   | Atp2a2    |                                                                      | 0,53 | 0,0385 |
| 1431751_a_at | Mpped2    | metallophosphoesterase domain containing 2                           | 0,53 | 0,0037 |
|              | 3110021A  |                                                                      |      |        |
| 1445708_x_at | 11Rik     | RIKEN cDNA 3110021A11 gene                                           | 0,53 | 0,0210 |
|              |           | potassium voltage-gated channel, Shal-related family, member 2       |      |        |
| 1450773_at   | Kcnd2     |                                                                      | 0,53 | 0,0300 |
| 1423437_at   | Gsta3     | glutathione S-transferase, alpha 3                                   | 0,53 | 0,0066 |
| 1440587_at   | NA        | NA                                                                   | 0,54 | 0,0043 |
| 1450468_at   | Myoc      | myocilin                                                             | 0,54 | 0,0098 |
| 1421590_at   | Mrgprh    | MAS-related GPR, member H                                            | 0,54 | 0,0047 |
| 1455455_at   | Glit28d2  | glycosyltransferase 28 domain containing 2                           | 0,54 | 0,0155 |
| 1451194_at   | Aldob     | aldolase B, fructose-bisphosphate                                    | 0,54 | 0,0054 |
|              | 443040211 |                                                                      |      |        |
| 1455541_a_at | 8Rik      | RIKEN cDNA 4430402118 gene                                           | 0,54 | 0,0184 |
| 1450725_s_at | Car14     | carbonic anhydrase 14                                                | 0,54 | 0,0066 |
| 1435695_a_at | Ggct      | gamma-glutamyl cyclotransferase                                      | 0,54 | 0,0003 |
| 1452823_at   | Gstk1     | glutathione S-transferase kappa 1                                    | 0,54 | 0,0001 |
| 1460125_at   | NA        | NA                                                                   | 0,54 | 0,0101 |
| 1436277_at   | Rnf207    | ring finger protein 207                                              | 0,54 | 0,0003 |
| 1428878_a_at | Pitpnc1   | phosphatidylinositol transfer protein, cytoplasmic 1                 | 0,54 | 0,0037 |
| 1424393_s_at | Adhfe1    | alcohol dehydrogenase, iron containing, 1                            | 0,54 | 0,0009 |
|              |           | solute carrier family 22 (organic cation transporter), member 5      |      |        |
| 1421848_at   | Slc22a5   |                                                                      | 0,54 | 0,0268 |
|              |           | potassium voltage-gated channel, Shal-related family, member 2       |      |        |
| 1422835_at   | Kcnd2     |                                                                      | 0,55 | 0,0069 |
|              | 2810416G  |                                                                      |      |        |
| 1435171_at   | 20Rik     | RIKEN cDNA 2810416G20 gene                                           | 0,55 | 0,0001 |
| 1418094_s_at | Car4      | carbonic anhydrase 4                                                 | 0,55 | 0,0131 |
| 1433763_at   | Entpd5    | ectonucleoside triphosphate diphosphohydrolase 5                     | 0,55 | 0,0064 |
| 1449001_at   | lvd       | isovaleryl coenzyme A dehydrogenase                                  | 0,55 | 0,0007 |
|              |           | solute carrier family 2 (facilitated glucose transporter), member 12 |      |        |
| 1435911_s_at | Slc2a12   |                                                                      | 0,55 | 0,0025 |
| 1419056_at   | Rtn2      | reticulon 2 (Z-band associated protein)                              | 0,55 | 0,0001 |
| 1417812_a_at | Lamb3     | laminin, beta 3                                                      | 0,55 | 0,0296 |
|              | 1110020G  |                                                                      |      |        |
| 1437287_at   | 09Rik     | RIKEN cDNA 1110020G09 gene                                           | 0,55 | 0,0051 |
| 1418715_at   | Pank1     | pantothenate kinase 1                                                | 0,55 | 0,0033 |
| 1451322_at   | Cmb1      | carboxymethylenebutenolidase-like (Pseudomonas)                      | 0,55 | 0,0168 |
| 1424790_at   | Slc25a42  | solute carrier family 25, member 42                                  | 0,55 | 0,0145 |

|              |          |                                                                                                |      |        |
|--------------|----------|------------------------------------------------------------------------------------------------|------|--------|
| 1426876_at   | Pm20d1   | peptidase M20 domain containing 1                                                              | 0,55 | 0,0118 |
| 1448185_at   | Herpud1  | homocysteine-inducible, endoplasmic reticulum stress-inducible, ubiquitin-like domain member 1 | 0,55 | 0,0240 |
| 1449398_at   | Rpl3l    | ribosomal protein L3-like                                                                      | 0,56 | 0,0005 |
| 1435097_at   | Mmab     | methylmalonic aciduria (cobalamin deficiency) type B homolog (human)                           | 0,56 | 0,0054 |
| 1455506_at   | Slc25a34 | solute carrier family 25, member 34                                                            | 0,56 | 0,0018 |
| 1448330_at   | Gstm1    | glutathione S-transferase, mu 1                                                                | 0,56 | 0,0183 |
| 1426263_at   | Cadm4    | cell adhesion molecule 4                                                                       | 0,56 | 0,0004 |
| 1434931_at   | Neo1     | neogenin                                                                                       | 0,56 | 0,0014 |
| 1437385_at   | Ccbe1    | collagen and calcium binding EGF domains 1                                                     | 0,56 | 0,0005 |
| 1421277_at   | Spna1    | spectrin alpha 1                                                                               | 0,56 | 0,0021 |
| 1417823_at   | Gcat     | glycine C-acetyltransferase (2-amino-3-ketobutyrate-coenzyme A ligase)                         | 0,56 | 0,0003 |
| 1453687_at   | Slc4a3   | solute carrier family 4 (anion exchanger), member 3                                            | 0,56 | 0,0045 |
| 1433532_a_at | Mbp      | myelin basic protein                                                                           | 0,56 | 0,0338 |
| 1416647_at   | Bckdha   | branched chain ketoacid dehydrogenase E1, alpha polypeptide                                    | 0,56 | 0,0019 |
| 1449547_at   | Asb14    | ankyrin repeat and SOCS box-containing 14                                                      | 0,56 | 0,0156 |
| 1418497_at   | Fgf13    | fibroblast growth factor 13                                                                    | 0,56 | 0,0004 |
| 1424392_at   | Adhfe1   | alcohol dehydrogenase, iron containing, 1                                                      | 0,56 | 0,0062 |
| 1417649_at   | Cdkn1c   | cyclin-dependent kinase inhibitor 1C (P57)                                                     | 0,56 | 0,0162 |
| 1434831_a_at | Foxo3    | forkhead box O3                                                                                | 0,56 | 0,0015 |
| 1425114_at   | Rbbp6    | retinoblastoma binding protein 6                                                               | 0,56 | 0,0055 |
| 1419040_at   | Cyp2d22  | cytochrome P450, family 2, subfamily d, polypeptide 22                                         | 0,56 | 0,0229 |
| 1420534_at   | Gucy1a3  | guanylate cyclase 1, soluble, alpha 3                                                          | 0,56 | 0,0139 |
| 1452583_s_at | Galm     | galactose mutarotase                                                                           | 0,57 | 0,0417 |
| 1449526_a_at | Gdpd3    | glycerophosphodiester phosphodiesterase domain containing 3                                    | 0,57 | 0,0015 |
| 1443932_at   | Klhdc1   | kelch domain containing 1                                                                      | 0,57 | 0,0187 |
| 1422973_a_at | Thrsp    | thyroid hormone responsive SPOT14 homolog (Rattus)                                             | 0,57 | 0,0011 |
| 1452678_a_at | Ccb1l    | cysteine conjugate-beta lyase 1                                                                | 0,57 | 0,0009 |
| 1455025_at   | Paqr9    | progesterin and adipoQ receptor family member IX                                               | 0,57 | 0,0186 |
| 1454646_at   | Tcp11l2  | t-complex 11 (mouse) like 2                                                                    | 0,57 | 0,0076 |
|              | OTTMUS   |                                                                                                |      |        |
|              | G0000001 |                                                                                                |      |        |
| 1435529_at   | 6644     | predicted gene, OTTMUSG00000016644                                                             | 0,57 | 0,0192 |
| 1449501_a_at | Gzmm     | granzyme M (lymphocyte met-ase 1)                                                              | 0,57 | 0,0013 |
| 1449443_at   | Decr1    | 2,4-dienoyl CoA reductase 1, mitochondrial                                                     | 0,57 | 0,0016 |
| 1458573_at   | NA       | NA                                                                                             | 0,57 | 0,0129 |
| 1450162_at   | Dpf3     | D4, zinc and double PHD fingers, family 3                                                      | 0,57 | 0,0017 |
| 1435851_at   | Lgi1     | leucine-rich repeat LGI family, member 1                                                       | 0,57 | 0,0055 |
| 1420806_at   | Fgf16    | fibroblast growth factor 16                                                                    | 0,57 | 0,0180 |
| 1428444_at   | Asb2     | ankyrin repeat and SOCS box-containing 2                                                       | 0,57 | 0,0017 |
| 1452766_at   | Tppp     | tubulin polymerization promoting protein                                                       | 0,57 | 0,0030 |
| 1446582_at   | Poln     | DNA polymerase N                                                                               | 0,57 | 0,0103 |
| 1424715_at   | Retsat   | retinol saturase (all trans retinol 13,14 reductase)                                           | 0,58 | 0,0058 |
| 1449519_at   | Gadd45a  | growth arrest and DNA-damage-inducible 45 alpha                                                | 0,58 | 0,0056 |
| 1444429_at   | Lrtm1    | leucine-rich repeats and transmembrane domains 1                                               | 0,58 | 0,0262 |
| 1439101_at   | Mylk3    | myosin light chain kinase 3                                                                    | 0,58 | 0,0019 |
| 1436189_at   | NA       | NA                                                                                             | 0,58 | 0,0009 |
| 1423892_at   | Apbb1    | amyloid beta (A4) precursor protein-binding, family B, member 1                                | 0,58 | 0,0144 |
| 1454984_at   | Lifr     | leukemia inhibitory factor receptor                                                            | 0,58 | 0,0002 |
| 1435234_at   | Ncoa2    | nuclear receptor coactivator 2                                                                 | 0,58 | 0,0213 |
| 1424478_at   | Bbs2     | Bardet-Biedl syndrome 2 (human)                                                                | 0,58 | 0,0071 |
| 1436758_at   | Hdac4    | histone deacetylase 4                                                                          | 0,58 | 0,0036 |

|              |          |                                                                                                                                       |      |        |
|--------------|----------|---------------------------------------------------------------------------------------------------------------------------------------|------|--------|
| 1424716_at   | Retsat   | retinol saturase (all trans retinol 13,14 reductase)                                                                                  | 0,58 | 0,0483 |
| 1434815_a_at | Mapkapk3 | mitogen-activated protein kinase-activated protein kinase 3                                                                           | 0,58 | 0,0054 |
| 1427964_at   | Cmtm8    | CKLF-like MARVEL transmembrane domain containing 8                                                                                    | 0,58 | 0,0071 |
| 1450184_s_at | Tef      | thyrotroph embryonic factor                                                                                                           | 0,58 | 0,0200 |
| 1435461_at   | Magi3    | membrane associated guanylate kinase, WW and PDZ domain containing 3                                                                  | 0,58 | 0,0083 |
| 1444089_at   | Spnb2    | spectrin beta 2                                                                                                                       | 0,58 | 0,0005 |
| 1426743_at   | Appl2    | adaptor protein, phosphotyrosine interaction, PH domain and leucine zipper containing 2                                               | 0,58 | 0,0022 |
| 1434150_a_at | Mettl7a1 | methyltransferase like 7A1                                                                                                            | 0,58 | 0,0013 |
| 1432472_a_at | Mccc2    | methylcrotonoyl-Coenzyme A carboxylase 2 (beta)                                                                                       | 0,59 | 0,0478 |
| 1455214_at   | Miif     | microphthalmia-associated transcription factor                                                                                        | 0,59 | 0,0077 |
| 1426383_at   | Cry2     | cryptochrome 2 (photolyase-like)                                                                                                      | 0,59 | 0,0391 |
| 1448170_at   | Siah2    | seven in absentia 2                                                                                                                   | 0,59 | 0,0500 |
| 1450790_at   | Tg       | thyroglobulin                                                                                                                         | 0,59 | 0,0111 |
| 1424211_at   | Slc25a33 | solute carrier family 25, member 33                                                                                                   | 0,59 | 0,0342 |
| 1452173_at   | Hadha    | hydroxyacyl-Coenzyme A dehydrogenase/3-ketoacyl-Coenzyme A thiolase/enoyl-Coenzyme A hydratase (trifunctional protein), alpha subunit | 0,59 | 0,0036 |
| 1416416_x_at | Gstm1    | glutathione S-transferase, mu 1                                                                                                       | 0,59 | 0,0146 |
| 1446524_at   | NA       | NA                                                                                                                                    | 0,59 | 0,0014 |
| 1420930_s_at | Ctnnal1  | catenin (cadherin associated protein), alpha-like 1                                                                                   | 0,59 | 0,0158 |
| 1435280_at   | AI452195 | expressed sequence AI452195                                                                                                           | 0,59 | 0,0004 |
| 1454647_at   | Nphp3    | nephronophthisis 3 (adolescent)                                                                                                       | 0,59 | 0,0486 |
| 1433856_at   | Hisppd1  | histidine acid phosphatase domain containing 1                                                                                        | 0,59 | 0,0248 |
| 1454858_x_at | Mettl7a1 | methyltransferase like 7A1                                                                                                            | 0,59 | 0,0010 |
| 1447774_x_at | 10Rik    | RIKEN cDNA 5730469M10 gene                                                                                                            | 0,59 | 0,0056 |
| 1421312_a_at | Kifc2    | kinesin family member C2                                                                                                              | 0,59 | 0,0029 |
| 1456480_at   | Fry      | furry homolog (Drosophila)                                                                                                            | 0,59 | 0,0164 |
| 1455765_a_at | Abcc8    | ATP-binding cassette, sub-family C (CFTR/MRP), member 8                                                                               | 0,59 | 0,0114 |
| 1429809_at   | Tmtc2    | transmembrane and tetratricopeptide repeat containing 2                                                                               | 0,59 | 0,0365 |
| 1428662_a_at | Hopx     | HOP homeobox                                                                                                                          | 0,59 | 0,0044 |
| 1425837_a_at | Ccrn4l   | CCR4 carbon catabolite repression 4-like (S. cerevisiae)                                                                              | 0,59 | 0,0482 |
| 1435787_at   | Ppm1l    | protein phosphatase 1 (formerly 2C)-like                                                                                              | 0,59 | 0,0002 |
| 1423893_x_at | Apbb1    | amyloid beta (A4) precursor protein-binding, family B, member 1                                                                       | 0,59 | 0,0217 |
| 1449834_at   | Magix    | MAGI family member, X-linked                                                                                                          | 0,60 | 0,0215 |
| 1428344_at   | Ppapdc2  | phosphatidic acid phosphatase type 2 domain containing 2                                                                              | 0,60 | 0,0031 |
| 1429918_at   | Arhgap20 | Rho GTPase activating protein 20                                                                                                      | 0,60 | 0,0328 |
| 1422589_at   | Rab3a    | RAB3A, member RAS oncogene family                                                                                                     | 0,60 | 0,0306 |
| 1449544_a_at | Kcnh2    | potassium voltage-gated channel, subfamily H (eag-related), member 2                                                                  | 0,60 | 0,0399 |
| 1420619_a_at | Aes      | amino-terminal enhancer of split                                                                                                      | 0,60 | 0,0053 |
| 1452939_a_at | Pitpnc1  | phosphatidylinositol transfer protein, cytoplasmic 1                                                                                  | 0,60 | 0,0309 |
| 1418589_a_at | Mlf1     | myeloid leukemia factor 1                                                                                                             | 0,60 | 0,0025 |
| 1450933_at   | Pde7a    | phosphodiesterase 7A                                                                                                                  | 0,60 | 0,0383 |
| 1417190_at   | Nampt    | nicotinamide phosphoribosyltransferase                                                                                                | 0,60 | 0,0015 |
| 1456716_s_at | 3110002H | RIKEN cDNA 3110002H16 gene                                                                                                            | 0,60 | 0,0034 |
| 1454803_a_at | 16Rik    | histone deacetylase 11                                                                                                                | 0,60 | 0,0095 |
| 1424175_at   | Hdac11   | thyrotroph embryonic factor                                                                                                           | 0,60 | 0,0350 |
| 1422948_s_at | Tef      | histone cluster 1, H3a                                                                                                                | 0,60 | 0,0001 |
|              | Hist1h3a |                                                                                                                                       |      |        |



|              |          |                                                                     |      |        |
|--------------|----------|---------------------------------------------------------------------|------|--------|
| 1455320_at   | NA       | NA                                                                  | 0,60 | 0,0017 |
| 1452798_s_at | Mapk1ip1 | mitogen-activated protein kinase 1 interacting protein 1            | 0,60 | 0,0235 |
| 1417169_at   | Usp2     | ubiquitin specific peptidase 2                                      | 0,60 | 0,0192 |
| 1435630_s_at | Acat2    | acetyl-Coenzyme A acetyltransferase 2                               | 0,60 | 0,0006 |
| 1448717_at   | Gcdh     | glutaryl-Coenzyme A dehydrogenase                                   | 0,60 | 0,0004 |
| 1428731_at   | Usp54    | ubiquitin specific peptidase 54                                     | 0,60 | 0,0082 |
| 1417405_at   | Stard3   | START domain containing 3                                           | 0,60 | 0,0010 |
| 1427052_at   | Acacb    | acetyl-Coenzyme A carboxylase beta                                  | 0,60 | 0,0002 |
| 1435096_at   | Ric8b    | resistance to inhibitors of cholinesterase 8 homolog B (C. elegans) | 0,60 | 0,0006 |
| 1417841_at   | Pxmp2    | peroxisomal membrane protein 2                                      | 0,60 | 0,0054 |
| 1451776_s_at | Hopx     | HOP homeobox                                                        | 0,60 | 0,0070 |
| 1459793_s_at | Lym5     | LYR motif containing 5                                              | 0,60 | 0,0033 |
| 1422221_at   | Hand2    | heart and neural crest derivatives expressed transcript 2           | 0,61 | 0,0111 |
| 1436568_at   | Jam2     | junction adhesion molecule 2                                        | 0,61 | 0,0104 |
| 1448181_at   | Klf15    | Kruppel-like factor 15                                              | 0,61 | 0,0494 |
| 1452716_at   | 10Rik    | RIKEN cDNA 5730469M10 gene                                          | 0,61 | 0,0013 |
| 1427287_s_at | Itpr2    | inositol 1,4,5-triphosphate receptor 2                              | 0,61 | 0,0038 |
| 1454840_at   | Mccc2    | methylcrotonoyl-Coenzyme A carboxylase 2 (beta)                     | 0,61 | 0,0023 |
| 1454935_at   | 22Rik    | RIKEN cDNA D930001I22 gene                                          | 0,61 | 0,0003 |
| 1435893_at   | Vldlr    | very low density lipoprotein receptor                               | 0,61 | 0,0005 |
| 1424670_s_at | Zfyve21  | zinc finger, FYVE domain containing 21                              | 0,61 | 0,0005 |
| 1438980_x_at | Pm20d1   | peptidase M20 domain containing 1                                   | 0,61 | 0,0048 |
| 1435365_at   | 23Rik    | RIKEN cDNA 4732415M23 gene                                          | 0,61 | 0,0115 |
| 1429206_at   | Rhobtb1  | Rho-related BTB domain containing 1                                 | 0,61 | 0,0415 |
| 1452833_at   | Rapgef2  | Rap guanine nucleotide exchange factor (GEF) 2                      | 0,61 | 0,0059 |
| 1441679_at   | NA       | NA                                                                  | 0,61 | 0,0383 |
| 1418485_at   | Slc4a3   | solute carrier family 4 (anion exchanger), member 3                 | 0,61 | 0,0164 |
| 1452685_at   | 20Rik    | RIKEN cDNA 0610009O20 gene                                          | 0,61 | 0,0072 |
| 1431028_a_at | Pank1    | pantothenate kinase 1                                               | 0,61 | 0,0094 |
| 1445873_at   | Tfdp2    | transcription factor Dp 2                                           | 0,61 | 0,0312 |
| 1452457_a_at | Prkab1   | protein kinase, AMP-activated, beta 1 non-catalytic subunit         | 0,61 | 0,0132 |
| 1424510_at   | Nudt6    | nudix (nucleoside diphosphate linked moiety X)-type motif 6         | 0,61 | 0,0040 |
| 1432445_at   | 11Rik    | RIKEN cDNA 2310016G11 gene                                          | 0,61 | 0,0087 |
| 1428151_x_at | Ccbl1    | cysteine conjugate-beta lyase 1                                     | 0,61 | 0,0019 |
| 1423145_a_at | Tcap     | titin-cap                                                           | 0,61 | 0,0180 |
| 1428996_at   | 09Rik    | RIKEN cDNA 4833426J09 gene                                          | 0,61 | 0,0118 |
| 1429339_a_at | Acad10   | acyl-Coenzyme A dehydrogenase family, member 10                     | 0,62 | 0,0013 |
| 1452538_at   | Igh-6    | immunoglobulin heavy chain 6 (heavy chain of IgM)                   | 0,62 | 0,0296 |
| 1429681_a_at | Gpsn2    | glycoprotein, synaptic 2                                            | 0,62 | 0,0028 |
| 1423713_at   | Abcb8    | ATP-binding cassette, sub-family B (MDR/TAP), member 8              | 0,62 | 0,0088 |
| 1434170_at   | Wdr40b   | WD repeat domain 40B                                                | 0,62 | 0,0050 |
| 1437498_at   | 5440     | predicted gene, ENSMUSG00000055440                                  | 0,62 | 0,0026 |
| 1435750_at   | Gchfr    | GTP cyclohydrolase I feedback regulator                             | 0,62 | 0,0002 |
| 1429064_at   | Dip2c    | DIP2 disco-interacting protein 2 homolog C (Drosophila)             | 0,62 | 0,0000 |
| 1419039_at   | Cyp2d22  | cytochrome P450, family 2, subfamily d, polypeptide 22              | 0,62 | 0,0165 |

|              |          |                                                                              |      |        |
|--------------|----------|------------------------------------------------------------------------------|------|--------|
| 1427153_at   | Bckdhb   | branched chain ketoacid dehydrogenase E1, beta polypeptide                   | 0,62 | 0,0009 |
| 1453750_x_at | Pitpnc1  | phosphatidylinositol transfer protein, cytoplasmic 1                         | 0,62 | 0,0122 |
| 1435066_at   | Pitpnc1  | phosphatidylinositol transfer protein, cytoplasmic 1                         | 0,62 | 0,0007 |
| 1430477_s_at | NA       | NA                                                                           | 0,62 | 0,0121 |
| 1416958_at   | Nr1d2    | nuclear receptor subfamily 1, group D, member 2                              | 0,62 | 0,0187 |
|              | 4933403F |                                                                              |      |        |
| 1436219_at   | 05Rik    | RIKEN cDNA 4933403F05 gene                                                   | 0,62 | 0,0072 |
| 1437269_at   | Ttc38    | tetratricopeptide repeat domain 38                                           | 0,62 | 0,0058 |
| 1452204_at   | Anks1    | ankyrin repeat and SAM domain containing 1                                   | 0,62 | 0,0009 |
| 1415911_at   | Impact   | imprinted and ancient                                                        | 0,62 | 0,0145 |
| 1419577_at   | Fig4     | FIG4 homolog (S. cerevisiae)                                                 | 0,62 | 0,0019 |
| 1441185_at   | Msi2     | Musashi homolog 2 (Drosophila)                                               | 0,62 | 0,0314 |
| 1451501_a_at | Ghr      | growth hormone receptor                                                      | 0,62 | 0,0333 |
| 1450665_at   | Gabpa    | GA repeat binding protein, alpha                                             | 0,62 | 0,0142 |
| 1419455_at   | Il10rb   | interleukin 10 receptor, beta                                                | 0,62 | 0,0018 |
| 1448136_at   | Enpp2    | ectonucleotide pyrophosphatase/phosphodiesterase 2                           | 0,62 | 0,0046 |
| 1417542_at   | Rps6ka2  | ribosomal protein S6 kinase, polypeptide 2                                   | 0,62 | 0,0161 |
| 1426502_s_at | Gpt      | glutamic pyruvic transaminase, soluble                                       | 0,62 | 0,0415 |
| 1422309_a_at | Lenep    | lens epithelial protein                                                      | 0,62 | 0,0035 |
| 1424485_at   | Angptl3  | angiopoietin-like 3                                                          | 0,62 | 0,0183 |
| 1447739_x_at | Klhdc4   | kelch domain containing 4                                                    | 0,62 | 0,0065 |
| 1422264_s_at | Klf9     | Kruppel-like factor 9                                                        | 0,62 | 0,0080 |
|              | 1300010F |                                                                              |      |        |
| 1455376_at   | 03Rik    | RIKEN cDNA 1300010F03 gene                                                   | 0,62 | 0,0018 |
| 1452353_at   | Gpr155   | G protein-coupled receptor 155                                               | 0,62 | 0,0018 |
| 1417883_at   | Gstt2    | glutathione S-transferase, theta 2                                           | 0,62 | 0,0052 |
|              | 1700015C |                                                                              |      |        |
| 1447673_x_at | 15Rik    | RIKEN cDNA 1700015C15 gene                                                   | 0,62 | 0,0023 |
| 1438641_x_at | Fam57b   | family with sequence similarity 57, member B                                 | 0,62 | 0,0199 |
| 1418238_at   | Ivd      | isovaleryl coenzyme A dehydrogenase                                          | 0,63 | 0,0022 |
|              | 2410066E |                                                                              |      |        |
| 1434581_at   | 13Rik    | RIKEN cDNA 2410066E13 gene                                                   | 0,63 | 0,0356 |
|              |          | succinate-Coenzyme A ligase, GDP-forming, beta subunit                       |      |        |
| 1435841_s_at | Suclg2   |                                                                              | 0,63 | 0,0001 |
| 1428804_at   | Mfap3l   | microfibrillar-associated protein 3-like                                     | 0,63 | 0,0023 |
| 1428014_at   | Hist1h4h | histone cluster 1, H4h                                                       | 0,63 | 0,0074 |
| 1419292_at   | Htra3    | HtrA serine peptidase 3                                                      | 0,63 | 0,0143 |
|              |          | protein-L-isoaspartate (D-aspartate) O-methyltransferase domain containing 2 |      |        |
| 1427074_at   | Pcmt2    |                                                                              | 0,63 | 0,0131 |
| 1428081_at   | Klhl21   | kelch-like 21 (Drosophila)                                                   | 0,63 | 0,0001 |
| 1450643_s_at | Acs1l    | acyl-CoA synthetase long-chain family member 1                               | 0,63 | 0,0146 |
| 1446738_at   | NA       | NA                                                                           | 0,63 | 0,0038 |
| 1447760_x_at | Ehf      | ets homologous factor                                                        | 0,63 | 0,0254 |
| 1421126_at   | Ryr2     | ryanodine receptor 2, cardiac                                                | 0,63 | 0,0404 |
| 1428614_at   | Ldhd     | lactate dehydrogenase D                                                      | 0,63 | 0,0002 |
| 1455531_at   | Mfsd4    | major facilitator superfamily domain containing 4                            | 0,63 | 0,0030 |
|              | 1810049H |                                                                              |      |        |
| 1460254_at   | 13Rik    | RIKEN cDNA 1810049H13 gene                                                   | 0,63 | 0,0275 |
|              | 2610528E |                                                                              |      |        |
| 1428519_at   | 23Rik    | RIKEN cDNA 2610528E23 gene                                                   | 0,63 | 0,0331 |
| 1428025_s_at | Pitpnc1  | phosphatidylinositol transfer protein, cytoplasmic 1                         | 0,63 | 0,0313 |
| 1433873_s_at | Pcnt     | pericentrin (kendrin)                                                        | 0,63 | 0,0324 |
| 1449076_x_at | Adi1     | acireductone dioxygenase 1                                                   | 0,63 | 0,0015 |
| 1436739_at   | Agtr1a   | angiotensin II receptor, type 1a                                             | 0,63 | 0,0207 |
| 1423104_at   | Irs1     | insulin receptor substrate 1                                                 | 0,63 | 0,0231 |
| 1439675_at   | Ppara    | peroxisome proliferator activated receptor alpha                             | 0,63 | 0,0030 |

|              |                    |                                                                         |      |        |
|--------------|--------------------|-------------------------------------------------------------------------|------|--------|
| 1460279_a_at | Gtf2i              | general transcription factor II I                                       | 0,63 | 0,0100 |
| 1430776_s_at | Ankrd24            | ankyrin repeat domain 24                                                | 0,63 | 0,0454 |
| 1434133_s_at | Wdr42a             | WD repeat domain 42A                                                    | 0,63 | 0,0034 |
| 1445431_at   | NA                 | NA                                                                      | 0,63 | 0,0040 |
| 1434013_at   | Ablim3<br>Ncrna001 | actin binding LIM protein family, member 3                              | 0,64 | 0,0293 |
| 1455558_at   | 53                 | non-protein coding RNA 153                                              | 0,64 | 0,0017 |
| 1438195_at   | Gpd1l              | glycerol-3-phosphate dehydrogenase 1-like                               | 0,64 | 0,0017 |
| 1433493_at   | Fam73b             | family with sequence similarity 73, member B                            | 0,64 | 0,0289 |
| 1424833_at   | Itpr2              | inositol 1,4,5-triphosphate receptor 2                                  | 0,64 | 0,0015 |
| 1450660_at   | Pts                | 6-pyruvoyl-tetrahydropterin synthase                                    | 0,64 | 0,0064 |
| 1451050_at   | Nt5c3              | 5'-nucleotidase, cytosolic III                                          | 0,64 | 0,0109 |
| 1424308_at   | Slc24a3            | solute carrier family 24 (sodium/potassium/calcium exchanger), member 3 | 0,64 | 0,0067 |
| 1454967_at   | NA                 | NA                                                                      | 0,64 | 0,0009 |
| 1416301_a_at | Ebf1               | early B-cell factor 1                                                   | 0,64 | 0,0187 |
| 1426729_at   | Fam131a            | family with sequence similarity 131, member A                           | 0,64 | 0,0026 |
| 1451019_at   | Ctsf               | cathepsin F                                                             | 0,64 | 0,0241 |
| 1452707_at   | Klhl30             | kelch-like 30 (Drosophila)                                              | 0,64 | 0,0014 |
| 1418093_a_at | Egf                | epidermal growth factor                                                 | 0,64 | 0,0111 |
| 1421180_at   | Lix1               | limb expression 1 homolog (chicken)                                     | 0,64 | 0,0307 |
| 1434832_at   | Foxo3              | forkhead box O3                                                         | 0,64 | 0,0247 |
| 1417673_at   | Grb14              | growth factor receptor bound protein 14                                 | 0,64 | 0,0094 |
| 1424882_a_at | Nt5dc2             | 5'-nucleotidase domain containing 2                                     | 0,64 | 0,0303 |
| 1449969_at   | Tmod4              | tropomodulin 4                                                          | 0,64 | 0,0471 |
| 1435292_at   | Tbc1d4             | TBC1 domain family, member 4                                            | 0,64 | 0,0089 |
| 1460601_at   | Myrip              | myosin VIIA and Rab interacting protein                                 | 0,64 | 0,0044 |
| 1417928_at   | Pdlim4             | PDZ and LIM domain 4                                                    | 0,64 | 0,0032 |
| 1427441_a_at | Suclg2             | succinate-Coenzyme A ligase, GDP-forming, beta subunit                  | 0,64 | 0,0111 |
| 1430527_a_at | Rnf167             | ring finger protein 167                                                 | 0,64 | 0,0279 |
| 1415958_at   | Slc2a4             | solute carrier family 2 (facilitated glucose transporter), member 4     | 0,64 | 0,0199 |
| 1437462_x_at | Mmp15              | matrix metalloproteinase 15                                             | 0,64 | 0,0386 |
| 1429965_at   | Lonrf2             | LON peptidase N-terminal domain and ring finger 2                       | 0,64 | 0,0012 |
| 1433486_at   | Clcn3              | chloride channel 3                                                      | 0,64 | 0,0033 |
| 1436991_x_at | Gsn                | gelsolin                                                                | 0,64 | 0,0001 |
| 1434235_at   | Slc20a2            | solute carrier family 20, member 2                                      | 0,64 | 0,0012 |
| 1433805_at   | Jak1               | Janus kinase 1                                                          | 0,64 | 0,0196 |
| 1454002_at   | NA                 | NA                                                                      | 0,64 | 0,0037 |
| 1436644_x_at | Tmem25             | transmembrane protein 25                                                | 0,64 | 0,0151 |
| 1424062_at   | Ube2d1             | ubiquitin-conjugating enzyme E2D 1, UBC4/5 homolog (yeast)              | 0,64 | 0,0105 |
| 1438338_at   | Mdh1               | malate dehydrogenase 1, NAD (soluble)                                   | 0,65 | 0,0022 |
| 1419405_at   | Nmb                | neuromedin B                                                            | 0,65 | 0,0409 |
| 1451226_at   | Pex6               | peroxisomal biogenesis factor 6                                         | 0,65 | 0,0164 |
| 1428613_at   | Ldhd               | lactate dehydrogenase D                                                 | 0,65 | 0,0002 |
| 1451528_at   | Tmem82             | transmembrane protein 82                                                | 0,65 | 0,0080 |
| 1424119_at   | Prkab1             | protein kinase, AMP-activated, beta 1 non-catalytic subunit             | 0,65 | 0,0001 |
| 1418502_a_at | Oxr1               | oxidation resistance 1                                                  | 0,65 | 0,0412 |
| 1437496_at   | Acad10             | acyl-Coenzyme A dehydrogenase family, member 10                         | 0,65 | 0,0088 |
| 1434273_at   | Fam174b            | family with sequence similarity 174, member B                           | 0,65 | 0,0163 |
| 1448370_at   | Ulk1               | Unc-51 like kinase 1 (C. elegans)                                       | 0,65 | 0,0024 |
| 1460112_at   | NA                 | NA                                                                      | 0,65 | 0,0015 |
| 1416798_a_at | Nme4               | non-metastatic cells 4, protein expressed in                            | 0,65 | 0,0330 |

|              |          |                                                                                             |      |        |
|--------------|----------|---------------------------------------------------------------------------------------------|------|--------|
| 1457894_at   | Mettl11b | methyltransferase like 11B                                                                  | 0,65 | 0,0476 |
| 1439793_at   | Gja3     | gap junction protein, alpha 3                                                               | 0,65 | 0,0028 |
| 1448612_at   | Sfn      | stratifin                                                                                   | 0,65 | 0,0455 |
| 1421086_at   | Per3     | period homolog 3 (Drosophila)                                                               | 0,65 | 0,0244 |
|              | B330016D |                                                                                             |      |        |
| 1455492_at   | 10Rik    | RIKEN cDNA B330016D10 gene                                                                  | 0,65 | 0,0397 |
| 1452020_a_at | Siva1    | SIVA1, apoptosis-inducing factor                                                            | 0,65 | 0,0021 |
| 1435275_at   | Cox6b2   | cytochrome c oxidase subunit VIb polypeptide 2                                              | 0,65 | 0,0267 |
| 1430421_a_at | Tmem205  | transmembrane protein 205                                                                   | 0,65 | 0,0011 |
| 1433782_at   | Cldn12   | claudin 12                                                                                  | 0,65 | 0,0046 |
| 1440343_at   | Rps6ka5  | ribosomal protein S6 kinase, polypeptide 5                                                  | 0,65 | 0,0055 |
| 1452807_s_at | Fam57b   | family with sequence similarity 57, member B                                                | 0,65 | 0,0054 |
| 1449377_at   | Nicn1    | nicolin 1                                                                                   | 0,65 | 0,0426 |
| 1424400_a_at | Aldh1l1  | aldehyde dehydrogenase 1 family, member L1                                                  | 0,65 | 0,0256 |
| 1449964_a_at | Mlycd    | malonyl-CoA decarboxylase                                                                   | 0,65 | 0,0330 |
| 1459756_at   | Cnot10   | CCR4-NOT transcription complex, subunit 10                                                  | 0,65 | 0,0120 |
| 1416772_at   | Cpt2     | carnitine palmitoyltransferase 2                                                            | 0,65 | 0,0043 |
| 1422279_at   | Fv1      | Friend virus susceptibility 1                                                               | 0,65 | 0,0462 |
| 1437563_at   | Phf2011  | PHD finger protein 20-like 1                                                                | 0,65 | 0,0333 |
|              |          | potassium inwardly-rectifying channel, subfamily J, member 5                                |      |        |
| 1421762_at   | Kcnj5    |                                                                                             | 0,65 | 0,0128 |
| 1444085_at   | Pdss2    | prenyl (solanesyl) diphosphate synthase, subunit 2                                          | 0,65 | 0,0001 |
| 1434909_at   | Rragd    | Ras-related GTP binding D                                                                   | 0,65 | 0,0026 |
|              | 1810013D |                                                                                             |      |        |
| 1454614_at   | 10Rik    | RIKEN cDNA 1810013D10 gene                                                                  | 0,65 | 0,0169 |
| 1438968_x_at | Spint2   | serine protease inhibitor, Kunitz type 2                                                    | 0,65 | 0,0026 |
| 1420513_at   | Efcab2   | EF-hand calcium binding domain 2                                                            | 0,65 | 0,0007 |
|              |          | mediator of RNA polymerase II transcription, subunit 12                                     |      |        |
| 1452864_at   | Med12l   | homolog (yeast)-like                                                                        | 0,65 | 0,0259 |
| 1459238_at   | NA       | NA                                                                                          | 0,65 | 0,0209 |
| 1448491_at   | Ech1     | enoyl coenzyme A hydratase 1, peroxisomal                                                   | 0,65 | 0,0008 |
| 1423915_at   | Olfml2b  | olfactomedin-like 2B                                                                        | 0,65 | 0,0125 |
| 1434264_at   | Ank2     | ankyrin 2, brain                                                                            | 0,65 | 0,0037 |
| 1436590_at   | Ppp1r3b  | protein phosphatase 1, regulatory (inhibitor) subunit 3B                                    | 0,65 | 0,0493 |
| 1439836_at   | Asb15    | ankyrin repeat and SOCS box-containing 15                                                   | 0,66 | 0,0008 |
|              |          | solute carrier family 25 (mitochondrial carrier, palmitoylcarnitine transporter), member 29 |      |        |
| 1423979_a_at | Slc25a29 |                                                                                             | 0,66 | 0,0022 |
| 1433711_s_at | Sesn1    | sestrin 1                                                                                   | 0,66 | 0,0302 |
| 1455590_at   | Nqo2     | NAD(P)H dehydrogenase, quinone 2                                                            | 0,66 | 0,0009 |
| 1445307_at   | NA       | NA                                                                                          | 0,66 | 0,0241 |
| 1438183_x_at | Sord     | sorbitol dehydrogenase                                                                      | 0,66 | 0,0132 |
| 1447557_at   | Rabif    | RAB interacting factor                                                                      | 0,66 | 0,0173 |
| 1415812_at   | Gsn      | gelsolin                                                                                    | 0,66 | 0,0011 |
| 1457721_at   | Ppara    | peroxisome proliferator activated receptor alpha                                            | 0,66 | 0,0028 |
| 1452264_at   | Tenc1    | tensin like C1 domain-containing phosphatase                                                | 0,66 | 0,0184 |
| 1416352_s_at | Gpsn2    | glycoprotein, synaptic 2                                                                    | 0,66 | 0,0046 |
|              | 9630058J |                                                                                             |      |        |
| 1436795_at   | 23Rik    | RIKEN cDNA 9630058J23 gene                                                                  | 0,66 | 0,0005 |
| 1450707_at   | Doc2g    | double C2, gamma                                                                            | 0,66 | 0,0395 |
| 1417962_s_at | Ghr      | growth hormone receptor                                                                     | 0,66 | 0,0001 |
|              |          | dodecenoyl-Coenzyme A delta isomerase (3,2 trans-enoyl-Coenzyme A isomerase)                |      |        |
| 1418321_at   | Dci      |                                                                                             | 0,66 | 0,0018 |
| 1456293_s_at | Ccnh     | cyclin H                                                                                    | 0,66 | 0,0001 |
|              |          | acetyl-Coenzyme A acyltransferase 2 (mitochondrial 3-oxoacyl-Coenzyme A thiolase)           |      |        |
| 1428146_s_at | Acaa2    |                                                                                             | 0,66 | 0,0059 |
| 1443854_at   | Hand2    | heart and neural crest derivatives expressed transcript 2                                   | 0,66 | 0,0324 |
| 1423980_at   | Slc25a29 | solute carrier family 25 (mitochondrial carrier,                                            | 0,66 | 0,0044 |

|              |          |                                                                                           |      |        |
|--------------|----------|-------------------------------------------------------------------------------------------|------|--------|
|              |          | palmitoylcarnitine transporter), member 29                                                |      |        |
| 1455008_at   | NA       | NA                                                                                        | 0,66 | 0,0005 |
| 1438963_s_at | Tfpt     | TCF3 (E2A) fusion partner                                                                 | 0,66 | 0,0171 |
| 1437861_s_at | Prkce    | protein kinase C, epsilon                                                                 | 0,66 | 0,0043 |
| 1443152_at   | Ptcd3    | pentatricopeptide repeat domain 3                                                         | 0,66 | 0,0132 |
| 1448927_at   | Kcnn2    | potassium intermediate/small conductance calcium-activated channel, subfamily N, member 2 | 0,66 | 0,0144 |
| 1416863_at   | Abhd8    | abhydrolase domain containing 8                                                           | 0,66 | 0,0087 |
|              | C730029A |                                                                                           |      |        |
| 1436168_at   | 08Rik    | RIKEN cDNA C730029A08 gene                                                                | 0,66 | 0,0433 |
| 1451974_at   | Osbpl2   | oxysterol binding protein-like 2                                                          | 0,66 | 0,0003 |
|              | D16H22S  |                                                                                           |      |        |
| 1448900_at   | 680E     | DNA segment, Chr 16, human D22S680E, expressed                                            | 0,66 | 0,0006 |
|              | 2310051E |                                                                                           |      |        |
| 1428289_at   | 17Rik    | RIKEN cDNA 2310051E17 gene                                                                | 0,66 | 0,0028 |
| 1452375_at   | Aldh4a1  | aldehyde dehydrogenase 4 family, member A1                                                | 0,66 | 0,0338 |
| 1434140_at   | Mcf2l    | mcf.2 transforming sequence-like                                                          | 0,66 | 0,0243 |
|              |          | potassium voltage-gated channel, shaker-related subfamily, member 1                       |      |        |
| 1455785_at   | Kcna1    |                                                                                           | 0,66 | 0,0271 |
|              | D930001B |                                                                                           |      |        |
| 1442416_at   | 02       | hypothetical protein D930001B02                                                           | 0,66 | 0,0311 |
| 1436050_x_at | Hes6     | hairy and enhancer of split 6 (Drosophila)                                                | 0,66 | 0,0041 |
| 1436121_a_at | Nsmce1   | non-SMC element 1 homolog (S. cerevisiae)                                                 | 0,66 | 0,0105 |
| 1449130_at   | Cd1d1    | CD1d1 antigen                                                                             | 0,66 | 0,0057 |
| 1454645_at   | Mgrn1    | mahogunin, ring finger 1                                                                  | 0,66 | 0,0140 |
| 1454741_s_at | Tmem164  | transmembrane protein 164                                                                 | 0,66 | 0,0437 |
| 1416609_at   | BC004004 | cDNA sequence BC004004                                                                    | 0,66 | 0,0013 |
|              |          | acetyl-Coenzyme A acyltransferase 2 (mitochondrial 3-oxoacyl-Coenzyme A thiolase)         |      |        |
| 1428145_at   | Acaa2    |                                                                                           | 0,67 | 0,0014 |
|              | 2310005E |                                                                                           |      |        |
| 1453173_at   | 10Rik    | RIKEN cDNA 2310005E10 gene                                                                | 0,67 | 0,0099 |
| 1427577_x_at | Igk      | immunoglobulin kappa chain complex                                                        | 0,67 | 0,0288 |
| 1416105_at   | Nnt      | nicotinamide nucleotide transhydrogenase                                                  | 0,67 | 0,0021 |
| 1418865_at   | Zfp385a  | zinc finger protein 385A                                                                  | 0,67 | 0,0173 |
| 1419062_at   | Epb4.1l3 | erythrocyte protein band 4.1-like 3                                                       | 0,67 | 0,0075 |
| 1421469_a_at | Stat5a   | signal transducer and activator of transcription 5A                                       | 0,67 | 0,0011 |
|              |          | glycerophosphodiester phosphodiesterase domain containing 1                               |      |        |
| 1424076_at   | Gdpd1    |                                                                                           | 0,67 | 0,0015 |
| 1448839_at   | Kank3    | KN motif and ankyrin repeat domains 3                                                     | 0,67 | 0,0485 |
| 1440118_at   | Slc25a39 | solute carrier family 25, member 39                                                       | 0,67 | 0,0341 |
|              | 4930481A |                                                                                           |      |        |
| 1436146_at   | 15Rik    | RIKEN cDNA 4930481A15 gene                                                                | 0,67 | 0,0370 |
|              | 1810049H |                                                                                           |      |        |
| 1441878_s_at | 13Rik    | RIKEN cDNA 1810049H13 gene                                                                | 0,67 | 0,0483 |
| 1456753_at   | NA       | NA                                                                                        | 0,67 | 0,0019 |
| 1451559_a_at | Dhrs4    | dehydrogenase/reductase (SDR family) member 4                                             | 0,67 | 0,0047 |
| 1431697_at   | Synj2    | synaptojanin 2                                                                            | 0,67 | 0,0289 |
| 1428512_at   | Bhlhb9   | basic helix-loop-helix domain containing, class B9                                        | 0,67 | 0,0043 |
| 1418706_at   | Slc38a3  | solute carrier family 38, member 3                                                        | 0,67 | 0,0034 |
|              |          | protein kinase, AMP-activated, gamma 1 non-catalytic subunit                              |      |        |
| 1433533_x_at | Prkag1   |                                                                                           | 0,67 | 0,0156 |
| 1424480_s_at | Akt2     | thymoma viral proto-oncogene 2                                                            | 0,67 | 0,0011 |
| 1423611_at   | Alpl     | alkaline phosphatase, liver/bone/kidney                                                   | 0,67 | 0,0071 |
| 1455991_at   | Ccbl2    | cysteine conjugate-beta lyase 2                                                           | 0,67 | 0,0334 |
|              |          | short chain dehydrogenase/reductase family 39U, member 1                                  |      |        |
| 1428695_at   | Sdr39u1  |                                                                                           | 0,67 | 0,0417 |
| 1441988_at   | Ppm1k    | protein phosphatase 1K (PP2C domain containing)                                           | 0,67 | 0,0119 |
| 1443739_at   | NA       | NA                                                                                        | 0,67 | 0,0425 |

|              |                            |                                                                                                                  |      |        |
|--------------|----------------------------|------------------------------------------------------------------------------------------------------------------|------|--------|
| 1456885_at   | NA                         | NA                                                                                                               | 0,67 | 0,0031 |
| 1420631_a_at | Blcap                      | bladder cancer associated protein homolog (human)                                                                | 0,67 | 0,0006 |
| 1415818_at   | Anxa6                      | annexin A6                                                                                                       | 0,67 | 0,0424 |
| 1450492_at   | Cngb3                      | cyclic nucleotide gated channel beta 3                                                                           | 0,67 | 0,0118 |
| 1417008_at   | Crat                       | carnitine acetyltransferase                                                                                      | 0,67 | 0,0005 |
| 1433717_at   | D19Wsu1<br>62e<br>2810013P | DNA segment, Chr 19, Wayne State University 162,<br>expressed                                                    | 0,67 | 0,0001 |
| 1429766_at   | 06Rik                      | RIKEN cDNA 2810013P06 gene                                                                                       | 0,67 | 0,0312 |
| 1428524_at   | Cars2                      | cysteinyl-tRNA synthetase 2 (mitochondrial)(putative)                                                            | 0,67 | 0,0297 |
| 1446288_at   | C78692<br>1110032A         | expressed sequence C78692                                                                                        | 0,67 | 0,0170 |
| 1417211_a_at | 03Rik<br>1810012P          | RIKEN cDNA 1110032A03 gene                                                                                       | 0,67 | 0,0389 |
| 1440234_at   | 15Rik                      | RIKEN cDNA 1810012P15 gene                                                                                       | 0,67 | 0,0041 |
| 1452111_at   | Mrps35                     | mitochondrial ribosomal protein S35                                                                              | 0,67 | 0,0010 |
| 1455961_at   | NA                         | NA                                                                                                               | 0,67 | 0,0214 |
| 1418377_a_at | Siva1                      | SIVA1, apoptosis-inducing factor                                                                                 | 0,67 | 0,0027 |
| 1460635_at   | Fastk<br>6720401G          | Fas-activated serine/threonine kinase                                                                            | 0,67 | 0,0026 |
| 1438915_at   | 13Rik                      | RIKEN cDNA 6720401G13 gene                                                                                       | 0,67 | 0,0138 |
| 1460703_at   | Ascc1                      | activating signal cointegrator 1 complex subunit 1                                                               | 0,67 | 0,0125 |
| 1424490_at   | Zfp428                     | zinc finger protein 428                                                                                          | 0,67 | 0,0005 |
| 1438251_x_at | Htra1                      | HtrA serine peptidase 1                                                                                          | 0,67 | 0,0492 |
| 1425627_x_at | Gstm1                      | glutathione S-transferase, mu 1                                                                                  | 0,67 | 0,0241 |
| 1456629_at   | Kank3                      | KN motif and ankyrin repeat domains 3                                                                            | 0,67 | 0,0181 |
| 1456616_a_at | Bsg                        | basigin                                                                                                          | 0,67 | 0,0177 |
| 1427542_at   | Sobp                       | sine oculis-binding protein homolog (Drosophila)                                                                 | 0,68 | 0,0020 |
| 1416383_a_at | Pcx                        | pyruvate carboxylase                                                                                             | 0,68 | 0,0085 |
| 1437866_at   | Dusp18                     | dual specificity phosphatase 18                                                                                  | 0,68 | 0,0287 |
| 1426427_at   | Tll1                       | tubulin tyrosine ligase-like 1                                                                                   | 0,68 | 0,0177 |
| 1453135_at   | Fndc5                      | fibronectin type III domain containing 5<br>ATPase, aminophospholipid transporter (APLT), class I,               | 0,68 | 0,0438 |
| 1433827_at   | Atp8a1                     | type 8A, member 1                                                                                                | 0,68 | 0,0481 |
| 1434151_at   | Mettl7a1                   | methyltransferase like 7A1                                                                                       | 0,68 | 0,0008 |
| 1447655_x_at | Sox6                       | SRY-box containing gene 6                                                                                        | 0,68 | 0,0174 |
| 1438010_at   | Tmem201                    | transmembrane protein 201                                                                                        | 0,68 | 0,0340 |
| 1444305_at   | Myh7b                      | myosin, heavy chain 7B, cardiac muscle, beta                                                                     | 0,68 | 0,0303 |
| 1424834_s_at | Itpr2<br>C030046I          | inositol 1,4,5-triphosphate receptor 2                                                                           | 0,68 | 0,0274 |
| 1433931_at   | 01Rik                      | RIKEN cDNA C030046I01 gene<br>splA/ryanodine receptor domain and SOCS box<br>containing 1                        | 0,68 | 0,0095 |
| 1420150_at   | Spsb1                      |                                                                                                                  | 0,68 | 0,0058 |
| 1458425_at   | NA                         | NA                                                                                                               | 0,68 | 0,0010 |
| 1454974_at   | Ntn1                       | netrin 1                                                                                                         | 0,68 | 0,0034 |
| 1450932_s_at | Dock9                      | dedicator of cytokinesis 9                                                                                       | 0,68 | 0,0008 |
| 1438910_a_at | Stom<br>LOC10004           | stomatin                                                                                                         | 0,68 | 0,0042 |
| 1419805_s_at | 5315                       | similar to Ggps1 protein                                                                                         | 0,68 | 0,0384 |
| 1452464_a_at | Metap11                    | methionine aminopeptidase-like 1                                                                                 | 0,68 | 0,0300 |
| 1446833_at   | NA                         | NA                                                                                                               | 0,68 | 0,0011 |
| 1423707_at   | Tmem50b                    | transmembrane protein 50B                                                                                        | 0,68 | 0,0016 |
| 1448602_at   | Pygm                       | muscle glycogen phosphorylase                                                                                    | 0,68 | 0,0211 |
| 1428647_at   | Pbx1                       | pre B-cell leukemia transcription factor 1<br>neutral sphingomyelinase (N-SMase) activation<br>associated factor | 0,68 | 0,0014 |
| 1416412_at   | Nsmaf                      |                                                                                                                  | 0,68 | 0,0043 |
| 1449331_a_at | Rapsn                      | receptor-associated protein of the synapse                                                                       | 0,68 | 0,0321 |

|              |          |                                                                    |      |        |
|--------------|----------|--------------------------------------------------------------------|------|--------|
| 1417049_at   | Rhd      | Rh blood group, D antigen                                          | 0,68 | 0,0003 |
|              | 2900008C |                                                                    |      |        |
| 1439509_at   | 10Rik    | RIKEN cDNA 2900008C10 gene                                         | 0,68 | 0,0007 |
| 1418782_at   | Rxrg     | retinoid X receptor gamma                                          | 0,68 | 0,0005 |
| 1449151_at   | Pctk3    | PCTAIRE-motif protein kinase 3                                     | 0,68 | 0,0018 |
| 1452666_a_at | Tmcc2    | transmembrane and coiled-coil domains 2                            | 0,68 | 0,0009 |
| 1417311_at   | Crip2    | cysteine rich protein 2                                            | 0,68 | 0,0003 |
| 1426493_a_at | Kifc2    | kinesin family member C2                                           | 0,68 | 0,0256 |
|              |          | dysbindin (dystrobrein binding protein 1) domain                   |      |        |
|              |          | containing 2                                                       |      |        |
| 1456943_a_at | Dbnnd2   |                                                                    | 0,68 | 0,0158 |
| 1428651_at   | Klhl24   | kelch-like 24 (Drosophila)                                         | 0,68 | 0,0038 |
| 1458350_at   | Opa3     | optic atrophy 3 (human)                                            | 0,68 | 0,0076 |
|              |          | ATPase, Ca <sup>++</sup> transporting, cardiac muscle, slow twitch |      |        |
|              |          | 2                                                                  |      |        |
| 1427251_at   | Atp2a2   |                                                                    | 0,68 | 0,0075 |
| 1436500_at   | Rps24    | ribosomal protein S24                                              | 0,68 | 0,0176 |
| 1460192_at   | Osbpl1a  | oxysterol binding protein-like 1A                                  | 0,68 | 0,0016 |
|              |          | solute carrier family 22 (organic cation transporter),             |      |        |
|              |          | member 5                                                           |      |        |
| 1450395_at   | Slc22a5  |                                                                    | 0,68 | 0,0047 |
|              | 2310040G |                                                                    |      |        |
| 1443575_at   | 24Rik    | RIKEN cDNA 2310040G24 gene                                         | 0,68 | 0,0231 |
| 1416610_a_at | Clcn3    | chloride channel 3                                                 | 0,68 | 0,0026 |
| 1425050_at   | Isoc1    | isochorismatase domain containing 1                                | 0,68 | 0,0003 |
| 1453216_at   | Gpt      | glutamic pyruvic transaminase, soluble                             | 0,68 | 0,0011 |
| 1426994_at   | Phlpp    | PH domain and leucine rich repeat protein phosphatase              | 0,68 | 0,0006 |
| 1435714_x_at | Il17d    | interleukin 17D                                                    | 0,68 | 0,0472 |
| 1418284_at   | Vps72    | vacuolar protein sorting 72 (yeast)                                | 0,68 | 0,0028 |
| 1448143_at   | Aldh2    | aldehyde dehydrogenase 2, mitochondrial                            | 0,68 | 0,0165 |
|              |          | SWI/SNF related, matrix associated, actin dependent                |      |        |
|              |          | regulator of chromatin, subfamily c, member 2                      |      |        |
| 1428382_at   | Smarcc2  |                                                                    | 0,68 | 0,0175 |
| 1451372_a_at | Art1     | ADP-ribosyltransferase 1                                           | 0,68 | 0,0034 |
| 1428338_at   | Spata2L  | spermatogenesis associated 2-like                                  | 0,68 | 0,0221 |
| 1455702_at   | Wdr22    | WD repeat domain 22                                                | 0,68 | 0,0358 |
| 1451543_at   | Fbxo21   | F-box protein 21                                                   | 0,68 | 0,0247 |
| 1448539_a_at | Acy3     | aspartoacylase (aminoacylase) 3                                    | 0,68 | 0,0065 |
| 1448870_at   | Ltbp1    | latent transforming growth factor beta binding protein 1           | 0,68 | 0,0014 |
| 1448104_at   | Aldh6a1  | aldehyde dehydrogenase family 6, subfamily A1                      | 0,68 | 0,0004 |
| 1455759_a_at | Ankhd1   | ankyrin repeat and KH domain containing 1                          | 0,68 | 0,0070 |
| 1417408_at   | F3       | coagulation factor III                                             | 0,68 | 0,0110 |
|              |          | gamma-aminobutyric acid (GABA-A) receptor, subunit                 |      |        |
|              |          | gamma 3                                                            |      |        |
| 1422187_at   | Gabrg3   |                                                                    | 0,69 | 0,0115 |
|              |          | acetyl-Coenzyme A acyltransferase 2 (mitochondrial 3-              |      |        |
|              |          | oxoacyl-Coenzyme A thiolase)                                       |      |        |
| 1455061_a_at | Acaa2    |                                                                    | 0,69 | 0,0382 |
| 1451500_at   | Ushbp1   | Usher syndrome 1C binding protein 1                                | 0,69 | 0,0177 |
| 1423314_s_at | Pde7a    | phosphodiesterase 7A                                               | 0,69 | 0,0457 |
| 1419416_a_at | Rarg     | retinoic acid receptor, gamma                                      | 0,69 | 0,0083 |
| 1419646_a_at | Mbp      | myelin basic protein                                               | 0,69 | 0,0144 |
| 1420762_a_at | Ybx2     | Y box protein 2                                                    | 0,69 | 0,0448 |
|              |          | required for meiotic nuclear division 1 homolog (S.                |      |        |
|              |          | cerevisiae)                                                        |      |        |
| 1424505_at   | Rmnd1    |                                                                    | 0,69 | 0,0485 |
| 1416608_a_at | BC004004 | cDNA sequence BC004004                                             | 0,69 | 0,0045 |
| 1434276_x_at | BC004004 | cDNA sequence BC004004                                             | 0,69 | 0,0035 |
| 1449314_at   | Zfpn2    | zinc finger protein, multitype 2                                   | 0,69 | 0,0106 |
| 1448391_at   | Rab9     | RAB9, member RAS oncogene family                                   | 0,69 | 0,0489 |
| 1435917_at   | Ociad2   | O CIA domain containing 2                                          | 0,69 | 0,0312 |
| 1434265_s_at | Ank2     | ankyrin 2, brain                                                   | 0,69 | 0,0007 |
|              | 6720401G |                                                                    |      |        |
| 1438916_x_at | 13Rik    | RIKEN cDNA 6720401G13 gene                                         | 0,69 | 0,0072 |

|              |                               |                                                                                                                                  |      |        |
|--------------|-------------------------------|----------------------------------------------------------------------------------------------------------------------------------|------|--------|
| 1419097_a_at | Stom                          | stomatin                                                                                                                         | 0,69 | 0,0202 |
| 1420640_at   | Jmy                           | junction-mediating and regulatory protein                                                                                        | 0,69 | 0,0372 |
| 1451890_at   | Kif13a                        | kinesin family member 13A                                                                                                        | 0,69 | 0,0494 |
| 1425788_a_at | Echdc2                        | enoyl Coenzyme A hydratase domain containing 2                                                                                   | 0,69 | 0,0462 |
| 1436926_at   | Esrrb                         | estrogen related receptor, beta                                                                                                  | 0,69 | 0,0378 |
| AFFX-        |                               |                                                                                                                                  |      |        |
| PyrCarbMur/L |                               |                                                                                                                                  |      |        |
| 09192_3_at   | Pcx                           | pyruvate carboxylase                                                                                                             | 0,69 | 0,0025 |
| 1447823_x_at | Mapk12                        | mitogen-activated protein kinase 12                                                                                              | 0,69 | 0,0140 |
| 1452335_at   | Mfsd8                         | major facilitator superfamily domain containing 8                                                                                | 0,69 | 0,0058 |
| 1425051_at   | Isoc1                         | isochorismatase domain containing 1                                                                                              | 0,69 | 0,0044 |
| 1425529_s_at | D19Wsu1<br>62e                | DNA segment, Chr 19, Wayne State University 162,<br>expressed<br>calcium channel, voltage-dependent, T type, alpha 1G<br>subunit | 0,69 | 0,0141 |
| 1423365_at   | Cacna1g                       |                                                                                                                                  | 0,69 | 0,0341 |
| 1420519_a_at | Eral1                         | Era (G-protein)-like 1 (E. coli)                                                                                                 | 0,69 | 0,0189 |
| 1451148_at   | Pink1                         | PTEN induced putative kinase 1                                                                                                   | 0,69 | 0,0275 |
| 1459072_at   | NA                            | NA                                                                                                                               | 0,69 | 0,0048 |
| 1416411_at   | Gstm2                         | glutathione S-transferase, mu 2                                                                                                  | 0,69 | 0,0234 |
| 1450884_at   | Cd36                          | CD36 antigen                                                                                                                     | 0,69 | 0,0009 |
| 1437171_x_at | Gsn                           | gelsolin                                                                                                                         | 0,69 | 0,0004 |
| 1433817_at   | Agpat3                        | 1-acylglycerol-3-phosphate O-acyltransferase 3                                                                                   | 0,69 | 0,0241 |
| 1422064_a_at | Zbtb20                        | zinc finger and BTB domain containing 20                                                                                         | 0,69 | 0,0095 |
| 1417129_a_at | Meis2                         | Meis homeobox 2                                                                                                                  | 0,69 | 0,0359 |
| 1452962_at   | Tmem25                        | transmembrane protein 25                                                                                                         | 0,69 | 0,0124 |
| 1426822_at   | Rhot2                         | ras homolog gene family, member T2                                                                                               | 0,69 | 0,0008 |
| 1434441_at   | 1110018J<br>18Rik<br>LOC67245 | RIKEN cDNA 1110018J18 gene                                                                                                       | 0,69 | 0,0009 |
| 1451965_at   | 0                             | V(kappa) gene product                                                                                                            | 0,69 | 0,0280 |
| 1434141_at   | Gucy1a3                       | guanylate cyclase 1, soluble, alpha 3                                                                                            | 0,69 | 0,0234 |
| 1436070_at   | Glo1                          | glyoxalase 1                                                                                                                     | 0,69 | 0,0336 |
| 1433541_a_at | Ubp2l                         | ubiquitin associated protein 2-like                                                                                              | 0,69 | 0,0378 |
| 1418983_at   | Inadl                         | InaD-like (Drosophila)                                                                                                           | 0,69 | 0,0073 |
| 1427656_at   | Tcrb-J<br>AW01173             | T-cell receptor beta, joining region                                                                                             | 0,69 | 0,0461 |
| 1440475_at   | 8<br>C030006K                 | expressed sequence AW011738                                                                                                      | 0,70 | 0,0288 |
| 1451085_at   | 11Rik                         | RIKEN cDNA C030006K11 gene                                                                                                       | 0,70 | 0,0116 |
| 1445315_at   | NA                            | NA                                                                                                                               | 0,70 | 0,0203 |
| 1426440_at   | Dhrs7                         | dehydrogenase/reductase (SDR family) member 7                                                                                    | 0,70 | 0,0154 |
| 1452021_a_at | Hes6                          | hairy and enhancer of split 6 (Drosophila)                                                                                       | 0,70 | 0,0213 |
| 1422522_at   | Fxr2                          | fragile X mental retardation, autosomal homolog 2                                                                                | 0,70 | 0,0211 |
| 1456072_at   | Ppp1r9a                       | protein phosphatase 1, regulatory (inhibitor) subunit 9A                                                                         | 0,70 | 0,0011 |
| 1454987_a_at | H2-Ke6                        | H2-K region expressed gene 6                                                                                                     | 0,70 | 0,0049 |
| 1448499_a_at | Ephx2                         | epoxide hydrolase 2, cytoplasmic                                                                                                 | 0,70 | 0,0017 |
| 1419471_a_at | Nudc                          | nuclear distribution gene C homolog (Aspergillus)                                                                                | 0,70 | 0,0015 |
| 1425678_a_at | Snrk                          | SNF related kinase                                                                                                               | 0,70 | 0,0274 |
| 1451523_a_at | Mif4gd                        | MIF4G domain containing                                                                                                          | 0,70 | 0,0018 |
| 1451088_a_at | Oxa1l                         | oxidase assembly 1-like                                                                                                          | 0,70 | 0,0023 |
| 1460076_x_at | NA                            | NA                                                                                                                               | 0,70 | 0,0225 |
| 1429024_at   | Rbm20                         | RNA binding motif protein 20                                                                                                     | 0,70 | 0,0197 |
| 1449118_at   | Dbt                           | dihydrolipoamide branched chain transacylase E2                                                                                  | 0,70 | 0,0126 |
| 1417324_at   | Mast2                         | microtubule associated serine/threonine kinase 2                                                                                 | 0,70 | 0,0118 |
| 1428323_at   | Gpd2                          | glycerol phosphate dehydrogenase 2, mitochondrial                                                                                | 0,70 | 0,0478 |
| 1435417_at   | AI464131                      | expressed sequence AI464131                                                                                                      | 0,70 | 0,0008 |
| 1423269_a_at | Nedd4l                        | neural precursor cell expressed, developmentally down-                                                                           | 0,70 | 0,0211 |



|              |          | regulated gene 4-like                                                                     |      |        |
|--------------|----------|-------------------------------------------------------------------------------------------|------|--------|
|              | 2610306M |                                                                                           |      |        |
| 1452988_at   | 01Rik    | RIKEN cDNA 2610306M01 gene                                                                | 0,70 | 0,0208 |
| 1428290_at   | Mipep    | mitochondrial intermediate peptidase                                                      | 0,70 | 0,0025 |
| 1449620_s_at | Adcy9    | adenylate cyclase 9                                                                       | 0,70 | 0,0470 |
| 1451405_at   | Pcca     | propionyl-Coenzyme A carboxylase, alpha polypeptide                                       | 0,70 | 0,0015 |
| 1427427_at   | Ryr3     | ryanodine receptor 3                                                                      | 0,70 | 0,0227 |
| 1439802_at   | Stk35    | serine/threonine kinase 35                                                                | 0,70 | 0,0177 |
| 1424845_a_at | Cep68    | centrosomal protein 68                                                                    | 0,70 | 0,0100 |
| 1424455_at   | Grasp1   | G protein-coupled receptor associated sorting protein 1                                   | 0,70 | 0,0142 |
| 1438505_s_at | Rnasen   | ribonuclease III, nuclear                                                                 | 0,70 | 0,0267 |
| 1418146_a_at | Rbl2     | retinoblastoma-like 2                                                                     | 0,70 | 0,0299 |
| 1418181_at   | Ptp4a3   | protein tyrosine phosphatase 4a3                                                          | 0,70 | 0,0215 |
|              | 4933439F |                                                                                           |      |        |
| 1438006_at   | 18Rik    | RIKEN cDNA 4933439F18 gene                                                                | 0,70 | 0,0029 |
| 1451279_at   | Erc1     | ELKS/RAB6-interacting/CAST family member 1                                                | 0,70 | 0,0013 |
| 1422728_at   | Inha     | inhibin alpha<br>mitogen-activated protein kinase-activated protein                       | 0,70 | 0,0124 |
| 1437494_at   | Mapkapk3 | kinase 3                                                                                  | 0,70 | 0,0033 |
| 1428957_at   | Tmem177  | transmembrane protein 177                                                                 | 0,70 | 0,0308 |
| 1443486_at   | Cog7     | component of oligomeric golgi complex 7<br>ATP-binding cassette, sub-family C (CFTR/MRP), | 0,70 | 0,0069 |
| 1435752_s_at | Abcc9    | member 9                                                                                  | 0,70 | 0,0016 |
| 1416449_x_at | Stxbp2   | syntaxin binding protein 2<br>solute carrier family 25 (mitochondrial carrier,            | 0,70 | 0,0482 |
| 1423981_x_at | Slc25a29 | palmitoylcarnitine transporter), member 29                                                | 0,70 | 0,0055 |
| 1418584_at   | Ccnh     | cyclin H                                                                                  | 0,70 | 0,0004 |
|              | 1110006G |                                                                                           |      |        |
| 1451143_at   | 06Rik    | RIKEN cDNA 1110006G06 gene                                                                | 0,70 | 0,0118 |
| 1417775_at   | Polr1a   | polymerase (RNA) I polypeptide A                                                          | 0,70 | 0,0022 |
| 1417701_at   | Ppp1r14c | protein phosphatase 1, regulatory (inhibitor) subunit 14c                                 | 0,70 | 0,0066 |
|              | B230118H |                                                                                           |      |        |
| 1416824_at   | 07Rik    | RIKEN cDNA B230118H07 gene                                                                | 0,70 | 0,0007 |
| 1423447_at   | Clpx     | caseinolytic peptidase X (E.coli)                                                         | 0,70 | 0,0459 |
| 1456542_s_at | Qrs1     | glutaminyl-tRNA synthase (glutamine-hydrolyzing)-like 1                                   | 0,70 | 0,0051 |
| 1454137_s_at | Hfe2     | hemochromatosis type 2 (juvenile) (human homolog)                                         | 0,70 | 0,0331 |
| 1430299_at   | Tsc22d4  | TSC22 domain family, member 4                                                             | 0,70 | 0,0292 |
| 1451834_at   | Cacnb1   | calcium channel, voltage-dependent, beta 1 subunit                                        | 0,70 | 0,0184 |
|              | 6330409N |                                                                                           |      |        |
| 1429723_at   | 04Rik    | RIKEN cDNA 6330409N04 gene                                                                | 0,70 | 0,0112 |
| 1434908_at   | Scaf1    | SR-related CTD-associated factor 1                                                        | 0,70 | 0,0103 |
| 1426323_x_at | Siva1    | SIVA1, apoptosis-inducing factor                                                          | 0,70 | 0,0034 |
| 1424182_at   | Acat1    | acetyl-Coenzyme A acetyltransferase 1                                                     | 0,70 | 0,0236 |
| 1451625_a_at | C8g      | complement component 8, gamma polypeptide                                                 | 0,70 | 0,0324 |
|              | 1110006G |                                                                                           |      |        |
| 1432562_at   | 14Rik    | RIKEN cDNA 1110006G14 gene                                                                | 0,70 | 0,0054 |
|              | 5730403B |                                                                                           |      |        |
| 1448193_at   | 10Rik    | RIKEN cDNA 5730403B10 gene                                                                | 0,70 | 0,0294 |
| 1429071_at   | Me3      | malic enzyme 3, NADP(+)-dependent, mitochondrial                                          | 0,70 | 0,0095 |
| 1428364_at   | Scnm1    | sodium channel modifier 1                                                                 | 0,70 | 0,0003 |
|              | 0610012G |                                                                                           |      |        |
| 1417003_at   | 03Rik    | RIKEN cDNA 0610012G03 gene                                                                | 0,71 | 0,0126 |
|              | 2010002M |                                                                                           |      |        |
| 1457976_at   | 12Rik    | RIKEN cDNA 2010002M12 gene                                                                | 0,71 | 0,0368 |
| 1421659_at   | Adra1a   | adrenergic receptor, alpha 1a                                                             | 0,71 | 0,0038 |
| 1453487_at   | Dhdh     | dihydrodiol dehydrogenase (dimeric)                                                       | 0,71 | 0,0232 |
| 1424786_s_at | Wdr45    | WD repeat domain 45                                                                       | 0,71 | 0,0024 |

|              |           |                                                                                                               |      |        |
|--------------|-----------|---------------------------------------------------------------------------------------------------------------|------|--------|
| 1423806_at   | Ints4     | integrator complex subunit 4                                                                                  | 0,71 | 0,0064 |
| 1455418_at   | NA        | NA                                                                                                            | 0,71 | 0,0313 |
| 1431833_a_at | Hmgcs2    | 3-hydroxy-3-methylglutaryl-Coenzyme A synthase 2                                                              | 0,71 | 0,0479 |
| 1449093_at   | Ctf1      | cardiotrophin 1                                                                                               | 0,71 | 0,0148 |
| 1425052_at   | Isoc1     | isochorismatase domain containing 1                                                                           | 0,71 | 0,0002 |
| 1415948_at   | Creg1     | cellular repressor of E1A-stimulated genes 1                                                                  | 0,71 | 0,0269 |
| 1456673_at   | NA        | NA                                                                                                            | 0,71 | 0,0341 |
| 1416778_at   | Sdpr      | serum deprivation response                                                                                    | 0,71 | 0,0183 |
| 1417734_at   | Akap8l    | A kinase (PRKA) anchor protein 8-like                                                                         | 0,71 | 0,0291 |
| 1419367_at   | Decr1     | 2,4-dienoyl CoA reductase 1, mitochondrial                                                                    | 0,71 | 0,0293 |
| 1452878_at   | Prkce     | protein kinase C, epsilon                                                                                     | 0,71 | 0,0013 |
|              | A230067G  |                                                                                                               |      |        |
| 1455750_at   | 21Rik     | RIKEN cDNA A230067G21 gene                                                                                    | 0,71 | 0,0169 |
| 1460067_at   | Ccr2      | chemokine (C-C motif) receptor 2                                                                              | 0,71 | 0,0019 |
| 1418187_at   | Ramp2     | receptor (calcitonin) activity modifying protein 2<br>nudix (nucleoside diphosphate linked moiety X)-type     | 0,71 | 0,0260 |
|              |           | motif 8                                                                                                       |      |        |
| 1450111_a_at | Nudt8     |                                                                                                               | 0,71 | 0,0059 |
| 1453065_at   | Aldh5a1   | aldehyde dehydrogenase family 5, subfamily A1                                                                 | 0,71 | 0,0176 |
| 1425341_at   | Kcnk3     | potassium channel, subfamily K, member 3                                                                      | 0,71 | 0,0375 |
| 1426208_x_at | Plagl1    | pleiomorphic adenoma gene-like 1                                                                              | 0,71 | 0,0300 |
| 1417094_at   | Acot7     | acyl-CoA thioesterase 7                                                                                       | 0,71 | 0,0399 |
| 1429306_at   | Lzic      | leucine zipper and CTNNBIP1 domain containing                                                                 | 0,71 | 0,0220 |
| 1439244_a_at | Tnrc6a    | trinucleotide repeat containing 6a                                                                            | 0,71 | 0,0180 |
| 1422500_at   | ldh3a     | isocitrate dehydrogenase 3 (NAD+) alpha                                                                       | 0,71 | 0,0129 |
| 1455296_at   | Adcy5     | adenylate cyclase 5                                                                                           | 0,71 | 0,0034 |
| 1451486_at   | Slc46a3   | solute carrier family 46, member 3                                                                            | 0,71 | 0,0169 |
|              | 4921524J  |                                                                                                               |      |        |
| 1454136_a_at | 17Rik     | RIKEN cDNA 4921524J17 gene                                                                                    | 0,71 | 0,0131 |
|              | 2510002D  |                                                                                                               |      |        |
| 1457675_at   | 24Rik     | RIKEN cDNA 2510002D24 gene                                                                                    | 0,71 | 0,0023 |
| 1446844_at   | Chchd7    | coiled-coil-helix-coiled-coil-helix domain containing 7<br>aldo-keto reductase family 7, member A5 (aflatoxin | 0,71 | 0,0068 |
|              |           | aldehyde reductase)                                                                                           |      |        |
| 1417294_at   | Akr7a5    |                                                                                                               | 0,71 | 0,0125 |
| 1448530_at   | Gmpr      | guanosine monophosphate reductase                                                                             | 0,71 | 0,0414 |
| 1425053_at   | Isoc1     | isochorismatase domain containing 1                                                                           | 0,71 | 0,0264 |
| 1424682_at   | Gpn3      | GPN-loop GTPase 3                                                                                             | 0,71 | 0,0040 |
| 1422375_a_at | Art1      | ADP-ribosyltransferase 1                                                                                      | 0,71 | 0,0243 |
|              | Hist2h2aa |                                                                                                               |      |        |
|              |           |                                                                                                               |      |        |
| 1418366_at   | 1         | histone cluster 2, H2aa1                                                                                      | 0,71 | 0,0035 |
| 1456037_x_at | Preb      | prolactin regulatory element binding                                                                          | 0,71 | 0,0384 |
| 1417565_at   | Abhd5     | abhydrolase domain containing 5                                                                               | 0,71 | 0,0015 |
|              | LOC10004  | similar to ectonucleoside triphosphate                                                                        |      |        |
| 1438177_x_at | 8085      | diphosphohydrolase 4                                                                                          | 0,71 | 0,0151 |
| 1456312_x_at | Gsn       | gelsolin                                                                                                      | 0,71 | 0,0007 |
| 1421417_s_at | Elac1     | elaC homolog 1 (E. coli)                                                                                      | 0,71 | 0,0454 |
|              | 2310067B  |                                                                                                               |      |        |
| 1426984_at   | 10Rik     | RIKEN cDNA 2310067B10 gene                                                                                    | 0,71 | 0,0007 |
| 1443405_at   | NA        | NA                                                                                                            | 0,71 | 0,0197 |
| 1434611_at   | Rnf123    | ring finger protein 123                                                                                       | 0,71 | 0,0061 |
| 1426055_a_at | Pigq      | phosphatidylinositol glycan anchor biosynthesis, class Q                                                      | 0,71 | 0,0315 |
| 1450376_at   | Mxi1      | Max interacting protein 1                                                                                     | 0,71 | 0,0029 |
| 1422184_a_at | Ak1       | adenylate kinase 1                                                                                            | 0,71 | 0,0015 |
| 1455267_at   | Esrrg     | estrogen-related receptor gamma                                                                               | 0,71 | 0,0045 |
| 1429307_s_at | Lzic      | leucine zipper and CTNNBIP1 domain containing                                                                 | 0,71 | 0,0238 |
|              | 6620401M  |                                                                                                               |      |        |
| 1429146_at   | 08Rik     | RIKEN cDNA 6620401M08 gene                                                                                    | 0,71 | 0,0185 |
| 1436251_at   | Pde1c     | phosphodiesterase 1C                                                                                          | 0,71 | 0,0320 |

|              |          |                                                                                       |      |        |
|--------------|----------|---------------------------------------------------------------------------------------|------|--------|
| 1460216_at   | Acads    | acyl-Coenzyme A dehydrogenase, short chain                                            | 0,71 | 0,0018 |
| 1417506_at   | Gmnn     | geminin                                                                               | 0,71 | 0,0225 |
| 1451277_at   | Zadh2    | zinc binding alcohol dehydrogenase, domain containing 2                               | 0,71 | 0,0133 |
| 1459757_x_at | Cnot10   | CCR4-NOT transcription complex, subunit 10                                            | 0,71 | 0,0043 |
| 1427075_s_at | Pcmt2    | protein-L-isoaspartate (D-aspartate) O-methyltransferase domain containing 2          | 0,71 | 0,0093 |
| 1435551_at   | Fhod3    | formin homology 2 domain containing 3                                                 | 0,71 | 0,0065 |
| 1452128_a_at | Brcc3    | BRCA1/BRCA2-containing complex, subunit 3                                             | 0,71 | 0,0011 |
| 1419173_at   | Acy1     | aminoacylase 1                                                                        | 0,71 | 0,0034 |
| 1454157_a_at | Pla2g2d  | phospholipase A2, group IID                                                           | 0,71 | 0,0283 |
| 1439433_a_at | Slc35a2  | solute carrier family 35 (UDP-galactose transporter), member A2                       | 0,71 | 0,0196 |
| 1423689_a_at | Gpsm1    | G-protein signalling modulator 1 (AGS3-like, C. elegans)                              | 0,71 | 0,0024 |
| 1428955_x_at | Slc9a3r2 | solute carrier family 9 (sodium/hydrogen exchanger), member 3 regulator 2             | 0,71 | 0,0385 |
| 1460352_s_at | Pik3r4   | phosphatidylinositol 3 kinase, regulatory subunit, polypeptide 4, p150                | 0,71 | 0,0088 |
| 1447921_at   | NA       | NA                                                                                    | 0,71 | 0,0184 |
| 1447807_s_at | Plekhh1  | pleckstrin homology domain containing, family H (with MyTH4 domain) member 1          | 0,71 | 0,0033 |
| 1416635_at   | Smpdl3a  | sphingomyelin phosphodiesterase, acid-like 3A                                         | 0,71 | 0,0039 |
| 1428288_at   | 17Rik    | RIKEN cDNA 2310051E17 gene                                                            | 0,72 | 0,0264 |
| 1428657_at   | Rreb1    | ras responsive element binding protein 1                                              | 0,72 | 0,0399 |
| 1423136_at   | Fgf1     | fibroblast growth factor 1                                                            | 0,72 | 0,0365 |
| 1428557_a_at | Ormdl1   | ORM1-like 1 (S. cerevisiae)                                                           | 0,72 | 0,0029 |
| 1453421_at   | Srr      | serine racemase                                                                       | 0,72 | 0,0073 |
| 1452202_at   | Pde2a    | phosphodiesterase 2A, cGMP-stimulated                                                 | 0,72 | 0,0198 |
| 1455845_at   | Wscd1    | WSC domain containing 1                                                               | 0,72 | 0,0407 |
| 1456510_x_at | Higd1c   | HIG1 domain family, member 1C                                                         | 0,72 | 0,0093 |
| 1431063_at   | Ganc     | glucosidase, alpha; neutral C                                                         | 0,72 | 0,0213 |
| 1432509_at   | 5Rik     | RIKEN cDNA 5033430115 gene                                                            | 0,72 | 0,0449 |
| 1427185_at   | Mef2a    | myocyte enhancer factor 2A                                                            | 0,72 | 0,0004 |
| 1417661_at   | Rdm1     | RAD52 motif 1                                                                         | 0,72 | 0,0113 |
| 1437662_at   | Acsm5    | acyl-CoA synthetase medium-chain family member 5                                      | 0,72 | 0,0236 |
| 1455622_at   | Podxl2   | podocalyxin-like 2                                                                    | 0,72 | 0,0199 |
| 1426934_at   | Nhsl1    | NHS-like 1                                                                            | 0,72 | 0,0325 |
| 1451451_at   | Gca      | granalcin                                                                             | 0,72 | 0,0317 |
| 1423229_at   | Inpp5e   | inositol polyphosphate-5-phosphatase E                                                | 0,72 | 0,0017 |
| 1441912_x_at | C2       | complement component 2 (within H-2S)                                                  | 0,72 | 0,0472 |
| 1448196_at   | Mat2b    | methionine adenosyltransferase II, beta                                               | 0,72 | 0,0061 |
| 1419869_s_at | Hdlbp    | high density lipoprotein (HDL) binding protein                                        | 0,72 | 0,0046 |
| 1434592_at   | Slc16a10 | solute carrier family 16 (monocarboxylic acid transporters), member 10                | 0,72 | 0,0425 |
| 1448099_at   | EG432995 | predicted gene, EG432995                                                              | 0,72 | 0,0163 |
| 1436943_at   | Cyb5d2   | cytochrome b5 domain containing 2                                                     | 0,72 | 0,0369 |
| 1453233_s_at | Calr3    | calreticulin 3                                                                        | 0,72 | 0,0224 |
| 1452005_at   | Dlat     | dihydrolipoamide S-acetyltransferase (E2 component of pyruvate dehydrogenase complex) | 0,72 | 0,0185 |
| 1420493_a_at | Pcvt2    | phosphate cytidyltransferase 2, ethanolamine                                          | 0,72 | 0,0021 |
| 1420776_a_at | Auh      | AU RNA binding protein/enoyl-coenzyme A hydratase                                     | 0,72 | 0,0006 |
| 1454708_at   | Ablim1   | actin-binding LIM protein 1                                                           | 0,72 | 0,0005 |
| 1420520_x_at | Eral1    | Era (G-protein)-like 1 (E. coli)                                                      | 0,72 | 0,0084 |
| 1455098_a_at | Vtn      | vitronectin                                                                           | 0,72 | 0,0434 |
| 1423958_a_at | Ttc33    | tetratricopeptide repeat domain 33                                                    | 0,72 | 0,0004 |

|              |                    |                                                                                                |      |        |
|--------------|--------------------|------------------------------------------------------------------------------------------------|------|--------|
| 1451575_a_at | Nudt3<br>1810010M  | nudix (nucleotide diphosphate linked moiety X)-type motif 3                                    | 0,72 | 0,0103 |
| 1428358_at   | 01Rik              | RIKEN cDNA 1810010M01 gene                                                                     | 0,72 | 0,0466 |
| 1433654_at   | Mgea5              | meningioma expressed antigen 5 (hyaluronidase)                                                 | 0,72 | 0,0042 |
| 1418501_a_at | Oxr1               | oxidation resistance 1                                                                         | 0,72 | 0,0006 |
| 1417103_at   | Ddt                | D-dopachrome tautomerase                                                                       | 0,72 | 0,0043 |
| 1442043_at   | Lhfpl4             | lipoma HMGIC fusion partner-like protein 4                                                     | 0,72 | 0,0289 |
| 1451392_at   | Elmod3             | ELMO/CED-12 domain containing 3                                                                | 0,72 | 0,0168 |
| 1419109_at   | Hrc                | histidine rich calcium binding protein                                                         | 0,72 | 0,0020 |
| 1429516_at   | Ubr2               | ubiquitin protein ligase E3 component n-recognin 2                                             | 0,72 | 0,0077 |
| 1457632_s_at | Meis2              | Meis homeobox 2                                                                                | 0,72 | 0,0446 |
| 1423313_at   | Pde7a              | phosphodiesterase 7A                                                                           | 0,72 | 0,0467 |
| 1455985_x_at | Shmt2              | serine hydroxymethyltransferase 2 (mitochondrial)                                              | 0,72 | 0,0181 |
| 1430769_s_at | Fam122a            | family with sequence similarity 122, member A<br>MAK10 homolog, amino-acid N-acetyltransferase | 0,72 | 0,0225 |
| 1460544_at   | Mak10              | subunit, ( <i>S. cerevisiae</i> )                                                              | 0,72 | 0,0219 |
| 1420127_s_at | CcpG1              | cell cycle progression 1                                                                       | 0,72 | 0,0033 |
| 1428656_at   | Rnasen             | ribonuclease III, nuclear<br>protein-L-isoaspartate (D-aspartate) O-                           | 0,72 | 0,0060 |
| 1429429_s_at | PcmtD1<br>1810009O | methyltransferase domain containing 1                                                          | 0,72 | 0,0033 |
| 1451334_at   | 10Rik              | RIKEN cDNA 1810009O10 gene                                                                     | 0,72 | 0,0038 |
| 1437377_a_at | Polrmt<br>Hnrnpa2b | polymerase (RNA) mitochondrial (DNA directed)                                                  | 0,72 | 0,0054 |
| 1433830_at   | 1                  | heterogeneous nuclear ribonucleoprotein A2/B1                                                  | 0,72 | 0,0168 |
| 1417581_at   | Dhodh              | dihydroorotate dehydrogenase                                                                   | 0,72 | 0,0162 |
| 1457936_at   | Mapk8              | mitogen-activated protein kinase 8                                                             | 0,72 | 0,0041 |
| 1455927_x_at | Nsmce1<br>2700029M | non-SMC element 1 homolog ( <i>S. cerevisiae</i> )                                             | 0,72 | 0,0443 |
| 1452877_at   | 09Rik              | RIKEN cDNA 2700029M09 gene                                                                     | 0,72 | 0,0054 |
| 1428356_at   | Osbp2              | oxysterol binding protein 2                                                                    | 0,72 | 0,0047 |
| 1415689_s_at | Zkscan3            | zinc finger with KRAB and SCAN domains 3                                                       | 0,72 | 0,0254 |
| 1449131_s_at | Cd1d1              | CD1d1 antigen                                                                                  | 0,72 | 0,0254 |
| 1436367_at   | NA                 | NA                                                                                             | 0,72 | 0,0210 |
| 1430650_at   | Zfp191             | zinc finger protein 191                                                                        | 0,72 | 0,0371 |
| 1430849_a_at | Cgrrf1<br>2810432L | cell growth regulator with ring finger domain 1                                                | 0,72 | 0,0204 |
| 1423679_at   | 12Rik<br>4933424B  | RIKEN cDNA 2810432L12 gene                                                                     | 0,72 | 0,0083 |
| 1455076_a_at | 01Rik<br>6330409D  | RIKEN cDNA 4933424B01 gene                                                                     | 0,72 | 0,0298 |
| 1447773_x_at | 20Rik              | RIKEN cDNA 6330409D20 gene                                                                     | 0,72 | 0,0151 |
| 1419606_a_at | Tnnt1              | troponin T1, skeletal, slow                                                                    | 0,73 | 0,0346 |
| 1436634_at   | Robo3              | roundabout homolog 3 ( <i>Drosophila</i> )                                                     | 0,73 | 0,0154 |
| 1452862_at   | Rreb1              | ras responsive element binding protein 1                                                       | 0,73 | 0,0137 |
| 1436925_at   | Foxn3              | forkhead box N3                                                                                | 0,73 | 0,0303 |
| 1458384_at   | NA                 | NA                                                                                             | 0,73 | 0,0270 |
| 1423736_a_at | Dym<br>5930434B    | dymeclin                                                                                       | 0,73 | 0,0019 |
| 1424690_at   | 04Rik              | RIKEN cDNA 5930434B04 gene                                                                     | 0,73 | 0,0192 |
| 1434105_at   | Epm2aip1           | EPM2A (laforin) interacting protein 1                                                          | 0,73 | 0,0173 |
| 1438292_x_at | Adk                | adenosine kinase                                                                               | 0,73 | 0,0026 |
| 1455361_at   | Dgkb               | diacylglycerol kinase, beta<br>membrane associated guanylate kinase, WW and PDZ                | 0,73 | 0,0313 |
| 1454855_at   | Magi2              | domain containing 2<br>core-binding factor, runt domain, alpha subunit 2,                      | 0,73 | 0,0393 |
| 1440963_at   | Cbfa2t3            | translocated to, 3 (human)                                                                     | 0,73 | 0,0312 |

|              |                      |                                                                              |      |        |
|--------------|----------------------|------------------------------------------------------------------------------|------|--------|
| 1448556_at   | Prlr                 | prolactin receptor                                                           | 0,73 | 0,0114 |
| 1429083_at   | Agl                  | amylo-1,6-glucosidase, 4-alpha-glucanotransferase                            | 0,73 | 0,0007 |
| 1459090_at   | NA                   | NA                                                                           | 0,73 | 0,0053 |
| 1436244_a_at | Tle2                 | transducin-like enhancer of split 2, homolog of Drosophila E(spl)            | 0,73 | 0,0269 |
| 1417854_at   | Map2k5               | mitogen-activated protein kinase kinase 5                                    | 0,73 | 0,0031 |
| 1427312_at   | Cmya5                | cardiomyopathy associated 5                                                  | 0,73 | 0,0069 |
| 1427598_at   | Snord116<br>2810013P | small nucleolar RNA, C/D box 116 cluster                                     | 0,73 | 0,0118 |
| 1429767_at   | 06Rik                | RIKEN cDNA 2810013P06 gene                                                   | 0,73 | 0,0053 |
| 1448038_at   | NA                   | NA                                                                           | 0,73 | 0,0065 |
| 1423448_at   | Rab11b               | RAB11B, member RAS oncogene family                                           | 0,73 | 0,0500 |
| 1438199_at   | AI316807             | expressed sequence AI316807                                                  | 0,73 | 0,0015 |
| 1418472_at   | Aspa                 | aspartoacylase                                                               | 0,73 | 0,0373 |
| 1419472_s_at | Nudc                 | nuclear distribution gene C homolog (Aspergillus)                            | 0,73 | 0,0013 |
| 1439062_at   | Kbtbd3               | kelch repeat and BTB (POZ) domain containing 3                               | 0,73 | 0,0074 |
| 1421097_at   | Endog                | endonuclease G                                                               | 0,73 | 0,0248 |
| 1428558_at   | Ormdl1               | ORM1-like 1 (S. cerevisiae)                                                  | 0,73 | 0,0210 |
| 1447457_at   | NA                   | NA                                                                           | 0,73 | 0,0461 |
| 1434738_at   | Tarsl2               | threonyl-tRNA synthetase-like 2                                              | 0,73 | 0,0150 |
| 1435801_at   | Fktn                 | fukutin                                                                      | 0,73 | 0,0034 |
| 1445841_at   | Lrrc39<br>4632415K   | leucine rich repeat containing 39                                            | 0,73 | 0,0448 |
| 1430614_at   | 11Rik                | RIKEN cDNA 4632415K11 gene                                                   | 0,73 | 0,0294 |
| 1444108_at   | Dnajc25              | DnaJ (Hsp40) homolog, subfamily C , member 25                                | 0,73 | 0,0381 |
| 1453187_at   | Ociad2               | OCIA domain containing 2                                                     | 0,73 | 0,0264 |
| 1416615_at   | Clpp                 | caseinolytic peptidase, ATP-dependent, proteolytic subunit homolog (E. coli) | 0,73 | 0,0003 |
| 1433753_x_at | Eral1                | Era (G-protein)-like 1 (E. coli)                                             | 0,73 | 0,0029 |
| 1435656_at   | Gmps                 | guanine monphosphate synthetase                                              | 0,73 | 0,0417 |
| 1456465_at   | Slc25a44             | solute carrier family 25, member 44                                          | 0,73 | 0,0397 |
| 1455446_x_at | Acadsb               | acyl-Coenzyme A dehydrogenase, short/branched chain                          | 0,73 | 0,0049 |
| 1456595_x_at | Gh                   | growth hormone                                                               | 0,73 | 0,0273 |
| 1423068_at   | Ift172<br>1110005A   | intraflagellar transport 172 homolog (Chlamydomonas)                         | 0,73 | 0,0040 |
| 1453485_s_at | 03Rik                | RIKEN cDNA 1110005A03 gene                                                   | 0,73 | 0,0102 |
| 1435980_x_at | Wnt6                 | wingless-related MMTV integration site 6                                     | 0,73 | 0,0205 |
| 1432410_a_at | Bmp7                 | bone morphogenetic protein 7                                                 | 0,73 | 0,0198 |
| 1416259_at   | Pex12                | peroxisomal biogenesis factor 12                                             | 0,73 | 0,0267 |
| 1435594_at   | Atl2                 | atlastin GTPase 2                                                            | 0,73 | 0,0226 |
| 1423497_at   | Klhl10               | kelch-like 10 (Drosophila)                                                   | 0,73 | 0,0446 |
| 1449194_at   | Mrps25               | mitochondrial ribosomal protein S25                                          | 0,73 | 0,0108 |
| 1416522_a_at | Grcc10               | gene rich cluster, C10 gene                                                  | 0,73 | 0,0012 |
| 1447701_x_at | Idh3a                | isocitrate dehydrogenase 3 (NAD+) alpha                                      | 0,73 | 0,0259 |
| 1428743_at   | Bri3bp               | Bri3 binding protein                                                         | 0,73 | 0,0088 |
| 1454827_at   | Pogz                 | pogo transposable element with ZNF domain                                    | 0,73 | 0,0066 |
| 1421309_at   | Mgmt                 | O-6-methylguanine-DNA methyltransferase                                      | 0,73 | 0,0145 |
| 1436038_a_at | Pigp                 | phosphatidylinositol glycan anchor biosynthesis, class P                     | 0,73 | 0,0079 |
| 1441807_s_at | NA                   | NA                                                                           | 0,73 | 0,0497 |
| 1455941_s_at | Map2k5               | mitogen-activated protein kinase kinase 5                                    | 0,73 | 0,0249 |
| 1424022_at   | Osgin1               | oxidative stress induced growth inhibitor 1                                  | 0,73 | 0,0414 |
| 1416999_at   | Smpd2                | sphingomyelin phosphodiesterase 2, neutral                                   | 0,73 | 0,0097 |
| 1418473_at   | Cutc                 | cutC copper transporter homolog (E.coli)                                     | 0,73 | 0,0052 |
| 1448065_at   | NA<br>C030043A       | NA                                                                           | 0,73 | 0,0155 |
| 1454532_at   | 13Rik                | RIKEN cDNA C030043A13 gene                                                   | 0,73 | 0,0385 |

|              |                   |                                                                                              |      |        |
|--------------|-------------------|----------------------------------------------------------------------------------------------|------|--------|
| 1435074_at   | Tmem106<br>b      | transmembrane protein 106B<br>SWI/SNF related matrix associated, actin dependent             | 0,73 | 0,0031 |
| 1416620_at   | Smarcal1          | regulator of chromatin, subfamily a-like 1<br>COX10 homolog, cytochrome c oxidase assembly   | 0,73 | 0,0157 |
| 1429329_at   | Cox10             | protein, heme A: farnesyltransferase (yeast)                                                 | 0,73 | 0,0271 |
| 1428769_at   | Tatdn3            | TatD DNase domain containing 3                                                               | 0,73 | 0,0044 |
| 1441919_x_at | Crat              | carnitine acetyltransferase                                                                  | 0,73 | 0,0018 |
| 1418951_at   | Txlnb             | taxilin beta                                                                                 | 0,73 | 0,0243 |
| 1423583_at   | Fem1a             | feminization 1 homolog a (C. elegans)<br>SWI/SNF related, matrix associated, actin dependent | 0,73 | 0,0209 |
| 1448913_at   | Smarcd1           | regulator of chromatin, subfamily d, member 1                                                | 0,73 | 0,0178 |
| 1422581_at   | Pias1             | protein inhibitor of activated STAT 1                                                        | 0,73 | 0,0033 |
| 1450606_at   | Pnmt              | phenylethanolamine-N-methyltransferase                                                       | 0,73 | 0,0217 |
| 1433680_x_at | Siva1             | SIVA1, apoptosis-inducing factor                                                             | 0,73 | 0,0169 |
| 1430369_at   | Epb4.1            | erythrocyte protein band 4.1                                                                 | 0,73 | 0,0266 |
| 1438041_at   | Pde7a             | phosphodiesterase 7A                                                                         | 0,73 | 0,0194 |
| 1435127_a_at | Ormdl1            | ORM1-like 1 (S. cerevisiae)                                                                  | 0,74 | 0,0009 |
| 1426561_a_at | Npnt              | nephronectin<br>protein kinase, AMP-activated, gamma 1 non-catalytic                         | 0,74 | 0,0232 |
| 1417690_at   | Prkag1            | subunit                                                                                      | 0,74 | 0,0094 |
| 1427114_at   | Ttc19             | tetratricopeptide repeat domain 19<br>formation of mitochondrial complexes 1 homolog (S.     | 0,74 | 0,0281 |
| 1416367_at   | Fmc1              | cerevisiae)                                                                                  | 0,74 | 0,0007 |
| 1436622_at   | Iqsec2            | IQ motif and Sec7 domain 2                                                                   | 0,74 | 0,0478 |
| 1420864_at   | Zfp161            | zinc finger protein 161                                                                      | 0,74 | 0,0346 |
| 1416373_at   | Nfs1              | nitrogen fixation gene 1 (S. cerevisiae)                                                     | 0,74 | 0,0006 |
| 1444307_at   | NA                | NA                                                                                           | 0,74 | 0,0027 |
| 1455204_at   | Pitpnc1           | phosphatidylinositol transfer protein, cytoplasmic 1                                         | 0,74 | 0,0069 |
| 1455227_at   | Aadacl1           | arylacetamide deacetylase-like 1                                                             | 0,74 | 0,0033 |
| 1430128_a_at | Reep6             | receptor accessory protein 6                                                                 | 0,74 | 0,0260 |
| 1421861_at   | Clstn1            | calsyntenin 1                                                                                | 0,74 | 0,0146 |
| 1434417_at   | Solh              | small optic lobes homolog (Drosophila)                                                       | 0,74 | 0,0304 |
| 1425628_a_at | Gtf2i             | general transcription factor II I                                                            | 0,74 | 0,0005 |
| 1454815_at   | Sertad2           | SERTA domain containing 2                                                                    | 0,74 | 0,0032 |
| 1424697_at   | Dtwd1             | DTW domain containing 1                                                                      | 0,74 | 0,0219 |
| 1454675_at   | Thra              | thyroid hormone receptor alpha                                                               | 0,74 | 0,0267 |
| 1436548_at   | 1810012P<br>15Rik | RIKEN cDNA 1810012P15 gene                                                                   | 0,74 | 0,0252 |
| 1416353_at   | Nr1h2<br>1110007M | nuclear receptor subfamily 1, group H, member 2                                              | 0,74 | 0,0119 |
| 1435333_at   | 04Rik             | RIKEN cDNA 1110007M04 gene                                                                   | 0,74 | 0,0133 |
| 1438477_a_at | Mcee              | methylmalonyl CoA epimerase                                                                  | 0,74 | 0,0349 |
| 1438348_x_at | Ccbl1             | cysteine conjugate-beta lyase 1                                                              | 0,74 | 0,0077 |
| 1454835_at   | Epm2aip1          | EPM2A (laforin) interacting protein 1                                                        | 0,74 | 0,0353 |
| 1450576_a_at | Sf3a2             | splicing factor 3a, subunit 2                                                                | 0,74 | 0,0054 |
| 1441377_at   | Kif6              | kinesin family member 6<br>TATA box binding protein (Tbp)-associated factor, RNA             | 0,74 | 0,0184 |
| 1419702_at   | Taf1a             | polymerase I, A                                                                              | 0,74 | 0,0492 |
| 1456143_at   | Prkcbp1           | protein kinase C binding protein 1                                                           | 0,74 | 0,0007 |
| 1423785_at   | Egln1             | EGL nine homolog 1 (C. elegans)                                                              | 0,74 | 0,0003 |
| 1425981_a_at | Rbl2              | retinoblastoma-like 2                                                                        | 0,74 | 0,0114 |
| 1452791_at   | Coq2              | coenzyme Q2 homolog, prenyltransferase (yeast)                                               | 0,74 | 0,0007 |
| 1454654_at   | Dirc2             | disrupted in renal carcinoma 2 (human)                                                       | 0,74 | 0,0114 |
| 1459637_at   | NA                | NA                                                                                           | 0,74 | 0,0066 |
| 1439117_at   | Clmn              | calmin                                                                                       | 0,74 | 0,0203 |
| 1427342_at   | Fastkd1           | FAST kinase domains 1                                                                        | 0,74 | 0,0067 |

|              |          |                                                                                             |      |        |
|--------------|----------|---------------------------------------------------------------------------------------------|------|--------|
| 1422501_s_at | ldh3a    | isocitrate dehydrogenase 3 (NAD+) alpha                                                     | 0,74 | 0,0321 |
| 1423889_at   | EG434402 | predicted gene, EG434402                                                                    | 0,74 | 0,0010 |
| 1428706_at   | Cenpv    | centromere protein V                                                                        | 0,74 | 0,0240 |
| 1424052_at   | Thap4    | THAP domain containing 4                                                                    | 0,74 | 0,0038 |
|              | D130020L |                                                                                             |      |        |
| 1457054_a_at | 05Rik    | RIKEN cDNA D130020L05 gene                                                                  | 0,74 | 0,0264 |
| 1426445_at   | Ctage5   | CTAGE family, member 5                                                                      | 0,74 | 0,0040 |
| 1419331_at   | Cdh17    | cadherin 17                                                                                 | 0,74 | 0,0497 |
|              | 1810026J |                                                                                             |      |        |
| 1426746_at   | 23Rik    | RIKEN cDNA 1810026J23 gene                                                                  | 0,74 | 0,0053 |
|              |          | solute carrier family 9 (sodium/hydrogen exchanger), member 3 regulator 2                   |      |        |
| 1428954_at   | Slc9a3r2 |                                                                                             | 0,74 | 0,0192 |
|              | 5830404H |                                                                                             |      |        |
| 1443901_at   | 04Rik    | RIKEN cDNA 5830404H04 gene                                                                  | 0,74 | 0,0403 |
| 1451465_at   | Ubl7     | ubiquitin-like 7 (bone marrow stromal cell-derived)                                         | 0,74 | 0,0233 |
|              |          | solute carrier family 25 (mitochondrial carrier, palmitoylcarnitine transporter), member 29 |      |        |
| 1438188_x_at | Slc25a29 |                                                                                             | 0,74 | 0,0458 |
|              | 1810020D |                                                                                             |      |        |
| 1451381_at   | 17Rik    | RIKEN cDNA 1810020D17 gene                                                                  | 0,74 | 0,0013 |
| 1425940_a_at | Ssbp3    | single-stranded DNA binding protein 3                                                       | 0,74 | 0,0386 |
|              |          | ATP synthase, H+ transporting, mitochondrial F1 complex, gamma polypeptide 1                |      |        |
| 1438809_at   | Atp5c1   |                                                                                             | 0,74 | 0,0482 |
|              |          | Ras association (RalGDS/AF-6) domain family member 3                                        |      |        |
| 1448546_at   | Rassf3   |                                                                                             | 0,74 | 0,0264 |
| 1447818_x_at | Rheb1    | Ras homolog enriched in brain like 1                                                        | 0,74 | 0,0158 |
| 1437382_at   | Acvr2a   | activin receptor IIA                                                                        | 0,74 | 0,0080 |
| 1452636_x_at | Gtpbp5   | GTP binding protein 5                                                                       | 0,74 | 0,0264 |
| 1419821_s_at | ldh1     | isocitrate dehydrogenase 1 (NADP+), soluble                                                 | 0,74 | 0,0158 |
|              | 1700020C |                                                                                             |      |        |
| 1424223_at   | 11Rik    | RIKEN cDNA 1700020C11 gene                                                                  | 0,74 | 0,0077 |
| 1419489_at   | Fam19a5  | family with sequence similarity 19, member A5                                               | 0,74 | 0,0290 |
| 1434073_at   | Gprasp2  | G protein-coupled receptor associated sorting protein 2                                     | 0,74 | 0,0094 |
| 1437364_at   | Coq3     | coenzyme Q3 homolog, methyltransferase (yeast)                                              | 0,74 | 0,0287 |
| 1421340_at   | Map3k5   | mitogen-activated protein kinase kinase kinase 5                                            | 0,74 | 0,0262 |
| 1450737_at   | Polr3k   | polymerase (RNA) III (DNA directed) polypeptide K                                           | 0,74 | 0,0466 |
| 1451219_at   | Ormdl1   | ORM1-like 1 (S. cerevisiae)                                                                 | 0,74 | 0,0354 |
| 1439521_at   | NA       | NA                                                                                          | 0,74 | 0,0069 |
| 1427982_s_at | Syne2    | synaptic nuclear envelope 2                                                                 | 0,74 | 0,0199 |
| 1417016_at   | Mapkapk5 | MAP kinase-activated protein kinase 5                                                       | 0,74 | 0,0172 |
| 1417438_at   | Rdh14    | retinol dehydrogenase 14 (all-trans and 9-cis)                                              | 0,74 | 0,0055 |
| 1417421_at   | S100a1   | S100 calcium binding protein A1                                                             | 0,74 | 0,0213 |
| 1435769_at   | Akap9    | A kinase (PRKA) anchor protein (yotiao) 9                                                   | 0,74 | 0,0187 |
|              |          | nudix (nucleoside diphosphate linked moiety X)-type motif 7                                 |      |        |
| 1430896_s_at | Nudt7    |                                                                                             | 0,74 | 0,0438 |
| 1422888_at   | Rnf5     | ring finger protein 5                                                                       | 0,74 | 0,0087 |
| 1451014_at   | Ror1     | receptor tyrosine kinase-like orphan receptor 1                                             | 0,74 | 0,0094 |
| 1430651_s_at | Zfp191   | zinc finger protein 191                                                                     | 0,75 | 0,0275 |
| 1451592_at   | P42pop   | Myb protein P42POP                                                                          | 0,75 | 0,0296 |
| 1449626_s_at | Acbd4    | acyl-Coenzyme A binding domain containing 4                                                 | 0,75 | 0,0095 |
| 1416319_at   | Adk      | adenosine kinase                                                                            | 0,75 | 0,0037 |
| 1449614_s_at | AI314976 | expressed sequence AI314976                                                                 | 0,75 | 0,0145 |
| 1434066_at   | Gtf3c1   | general transcription factor III C 1                                                        | 0,75 | 0,0124 |
| 1423750_a_at | Sf1      | splicing factor 1                                                                           | 0,75 | 0,0284 |
| 1450992_a_at | Meis1    | Meis homeobox 1                                                                             | 0,75 | 0,0459 |
|              | 1700021F |                                                                                             |      |        |
| 1421019_at   | 05Rik    | RIKEN cDNA 1700021F05 gene                                                                  | 0,75 | 0,0022 |
| 1433669_at   | Akap8    | A kinase (PRKA) anchor protein 8                                                            | 0,75 | 0,0015 |

|               |          |                                                                                                                                        |      |        |
|---------------|----------|----------------------------------------------------------------------------------------------------------------------------------------|------|--------|
| 1418017_at    | Pum2     | pumilio 2 (Drosophila)                                                                                                                 | 0,75 | 0,0386 |
| 1445352_at    | NA       | NA                                                                                                                                     | 0,75 | 0,0211 |
| 1437281_x_at  | Xab2     | XPA binding protein 2                                                                                                                  | 0,75 | 0,0075 |
| 1448418_s_at  | Wdr23    | WD repeat domain 23                                                                                                                    | 0,75 | 0,0232 |
|               | 0610009L |                                                                                                                                        |      |        |
| 1453141_at    | 18Rik    | RIKEN cDNA 0610009L18 gene                                                                                                             | 0,75 | 0,0180 |
| 1434210_s_at  | Lrig1    | leucine-rich repeats and immunoglobulin-like domains 1<br>TAF4A RNA polymerase II, TATA box binding protein<br>(TBP)-associated factor | 0,75 | 0,0297 |
| 1452438_s_at  | Taf4a    |                                                                                                                                        | 0,75 | 0,0339 |
|               | 2410129H |                                                                                                                                        |      |        |
| 1434663_at    | 14Rik    | RIKEN cDNA 2410129H14 gene                                                                                                             | 0,75 | 0,0213 |
| 1459337_at    | Alg6     | asparagine-linked glycosylation 6 homolog (yeast, alpha-<br>1,3,-glucosyltransferase)                                                  | 0,75 | 0,0179 |
|               | 0610040J |                                                                                                                                        |      |        |
| 1424404_at    | 01Rik    | RIKEN cDNA 0610040J01 gene                                                                                                             | 0,75 | 0,0088 |
| 1434616_at    | Slc38a10 | solute carrier family 38, member 10                                                                                                    | 0,75 | 0,0345 |
| 1457872_at    | NA       | NA                                                                                                                                     | 0,75 | 0,0187 |
| 1444755_at    | Mad11    | mitotic arrest deficient 1-like 1                                                                                                      | 0,75 | 0,0149 |
| 1451169_at    | Nomo1    | nodal modulator 1                                                                                                                      | 0,75 | 0,0081 |
| 1450614_x_at  | Ifna5    | interferon alpha 5                                                                                                                     | 0,75 | 0,0106 |
|               |          | caseinolytic peptidase, ATP-dependent, proteolytic<br>subunit homolog (E. coli)                                                        | 0,75 | 0,0037 |
| 1416616_s_at  | Clpp     |                                                                                                                                        | 0,75 | 0,0037 |
| 1439858_at    | NA       | NA                                                                                                                                     | 0,75 | 0,0336 |
| 1422397_a_at  | Il15ra   | interleukin 15 receptor, alpha chain                                                                                                   | 0,75 | 0,0265 |
|               |          | solute carrier family 9 (sodium/hydrogen exchanger),<br>member 3 regulator 2                                                           | 0,75 | 0,0434 |
| 1452976_a_at  | Slc9a3r2 |                                                                                                                                        | 0,75 | 0,0434 |
| 1423938_at    | Llgl2    | lethal giant larvae homolog 2 (Drosophila)                                                                                             | 0,75 | 0,0468 |
| AFFX-         |          |                                                                                                                                        |      |        |
| PyruCarbMur/L |          |                                                                                                                                        |      |        |
| 09192_MB_at   | Pcx      | pyruvate carboxylase                                                                                                                   | 0,75 | 0,0393 |
|               | C030046I |                                                                                                                                        |      |        |
| 1433932_x_at  | 01Rik    | RIKEN cDNA C030046I01 gene                                                                                                             | 0,75 | 0,0077 |
|               |          | PRP19/PSO4 pre-mRNA processing factor 19 homolog<br>(S. cerevisiae)                                                                    | 0,75 | 0,0085 |
| 1456531_x_at  | Prpf19   |                                                                                                                                        | 0,75 | 0,0085 |
| 1448692_at    | Ubqln4   | ubiquilin 4                                                                                                                            | 0,75 | 0,0413 |
| 1421409_at    | Msi1     | Musashi homolog 1(Drosophila)                                                                                                          | 0,75 | 0,0366 |
| 1449234_at    | Car15    | carbonic anhydrase 15                                                                                                                  | 0,75 | 0,0033 |
| 1417208_at    | Amacr    | alpha-methylacyl-CoA racemase                                                                                                          | 0,75 | 0,0116 |
| 1451671_at    | Gorasp1  | golgi reassembly stacking protein 1                                                                                                    | 0,75 | 0,0469 |
| 1455059_at    | Helz     | helicase with zinc finger domain                                                                                                       | 0,75 | 0,0172 |
| 1443952_at    | NA       | NA                                                                                                                                     | 0,75 | 0,0313 |
| 1449023_a_at  | Ezh1     | enhancer of zeste homolog 1 (Drosophila)                                                                                               | 0,75 | 0,0082 |
| 1452105_a_at  | Tsc2     | tuberous sclerosis 2                                                                                                                   | 0,75 | 0,0043 |
| 1460189_at    | Wdr23    | WD repeat domain 23                                                                                                                    | 0,75 | 0,0254 |
|               | 2900024O |                                                                                                                                        |      |        |
| 1437704_at    | 10Rik    | RIKEN cDNA 2900024O10 gene                                                                                                             | 0,75 | 0,0405 |
| 1424553_at    | Hhatl    | hedgehog acyltransferase-like                                                                                                          | 0,75 | 0,0165 |
| 1434161_at    | Lin52    | lin-52 homolog (C. elegans)                                                                                                            | 0,75 | 0,0348 |
| 1452942_at    | Tmem65   | transmembrane protein 65                                                                                                               | 0,75 | 0,0111 |
| 1425037_at    | Fgd4     | FYVE, RhoGEF and PH domain containing 4                                                                                                | 0,75 | 0,0258 |
| 1450048_a_at  | Idh2     | isocitrate dehydrogenase 2 (NADP+), mitochondrial                                                                                      | 0,75 | 0,0173 |
| 1420524_a_at  | Masp2    | mannan-binding lectin serine peptidase 2                                                                                               | 0,75 | 0,0094 |
| 1424418_at    | Slc25a38 | solute carrier family 25, member 38                                                                                                    | 0,75 | 0,0156 |
|               | 4933439F |                                                                                                                                        |      |        |
| 1420661_a_at  | 18Rik    | RIKEN cDNA 4933439F18 gene                                                                                                             | 0,75 | 0,0114 |
| 1419384_at    | Pick1    | protein interacting with C kinase 1                                                                                                    | 0,75 | 0,0211 |
|               | 4930564K |                                                                                                                                        |      |        |
| 1431523_at    | 09Rik    | RIKEN cDNA 4930564K09 gene                                                                                                             | 0,75 | 0,0090 |



|              |           |                                                         |      |        |
|--------------|-----------|---------------------------------------------------------|------|--------|
| 1440856_at   | Mapk8     | mitogen-activated protein kinase 8                      | 0,75 | 0,0046 |
| 1418040_at   | Tmem186   | transmembrane protein 186                               | 0,75 | 0,0069 |
| 1421535_a_at | Pde4a     | phosphodiesterase 4A, cAMP specific                     | 0,75 | 0,0300 |
| 1451404_at   | ORF19     | open reading frame 19                                   | 0,75 | 0,0096 |
| 1439234_a_at | Tm2d2     | TM2 domain containing 2                                 | 0,75 | 0,0355 |
| 1434754_at   | Garnl4    | GTPase activating RANGAP domain-like 4                  | 0,75 | 0,0033 |
| 1455614_at   | Nr1i3     | nuclear receptor subfamily 1, group I, member 3         | 0,75 | 0,0213 |
|              | D10Ert64  |                                                         |      |        |
| 1419994_s_at | 1e        | DNA segment, Chr 10, ERATO Doi 641, expressed           | 0,75 | 0,0272 |
| 1426654_at   | Zc3hc1    | zinc finger, C3HC type 1                                | 0,75 | 0,0249 |
|              | C530044N  |                                                         |      |        |
| 1426669_at   | 13Rik     | RIKEN cDNA C530044N13 gene                              | 0,75 | 0,0269 |
| 1434426_at   | Ncapd3    | non-SMC condensin II complex, subunit D3                | 0,75 | 0,0352 |
|              | 4930540M  |                                                         |      |        |
| 1430426_at   | 05Rik     | RIKEN cDNA 4930540M05 gene                              | 0,75 | 0,0278 |
| 1428134_at   | Coq9      | coenzyme Q9 homolog (yeast)                             | 0,75 | 0,0018 |
| 1440262_at   | AI414108  | expressed sequence AI414108                             | 0,75 | 0,0213 |
| 1421129_a_at | Atp2a3    | ATPase, Ca <sup>++</sup> transporting, ubiquitous       | 0,75 | 0,0112 |
|              | 2310061I0 |                                                         |      |        |
| 1434155_a_at | 4Rik      | RIKEN cDNA 2310061I04 gene                              | 0,75 | 0,0330 |
| 1424422_s_at | Lenep     | lens epithelial protein                                 | 0,75 | 0,0376 |
| 1436083_at   | Lrp3      | low density lipoprotein receptor-related protein 3      | 0,75 | 0,0312 |
| 1448286_at   | Hsd17b10  | hydroxysteroid (17-beta) dehydrogenase 10               | 0,75 | 0,0095 |
| 1436453_at   | BB144871  | expressed sequence BB144871                             | 0,75 | 0,0429 |
| 1438366_x_at | Clcn3     | chloride channel 3                                      | 0,75 | 0,0117 |
| 1421127_at   | Tmem42    | transmembrane protein 42                                | 0,75 | 0,0417 |
| 1427750_at   | Igk-V1    | immunoglobulin kappa chain variable 1 (V1)              | 0,75 | 0,0373 |
| 1421265_a_at | Rbm38     | RNA binding motif protein 38                            | 0,75 | 0,0162 |
| 1452745_at   | Trappc9   | trafficking protein particle complex 9                  | 0,75 | 0,0325 |
|              |           | fascin homolog 2, actin-bundling protein, retinal       |      |        |
| 1440605_at   | Fscn2     | (Strongylocentrotus purpuratus)                         | 0,76 | 0,0106 |
| 1436597_at   | Ankhd1    | ankyrin repeat and KH domain containing 1               | 0,76 | 0,0162 |
| 1460582_x_at | NA        | NA                                                      | 0,76 | 0,0091 |
| 1450266_at   | Scn10a    | sodium channel, voltage-gated, type X, alpha            | 0,76 | 0,0204 |
| 1441445_at   | Per3      | period homolog 3 (Drosophila)                           | 0,76 | 0,0282 |
| 1440936_at   | Serac1    | serine active site containing 1                         | 0,76 | 0,0158 |
|              | 9430038I0 |                                                         |      |        |
| 1431198_x_at | 1Rik      | RIKEN cDNA 9430038I01 gene                              | 0,76 | 0,0249 |
| 1454640_at   | Chchd7    | coiled-coil-helix-coiled-coil-helix domain containing 7 | 0,76 | 0,0019 |
| 1415690_at   | Mrpl27    | mitochondrial ribosomal protein L27                     | 0,76 | 0,0008 |
|              | 1600014C  |                                                         |      |        |
| 1434715_at   | 10Rik     | RIKEN cDNA 1600014C10 gene                              | 0,76 | 0,0121 |
| 1447592_at   | Dbh       | dopamine beta hydroxylase                               | 0,76 | 0,0233 |
| 1416275_at   | Slc26a6   | solute carrier family 26, member 6                      | 0,76 | 0,0387 |
|              | 1300001I0 |                                                         |      |        |
| 1428106_at   | 1Rik      | RIKEN cDNA 1300001I01 gene                              | 0,76 | 0,0457 |
| 1416427_at   | Ccni      | cyclin I                                                | 0,76 | 0,0303 |
| 1450670_at   | Dbh       | dopamine beta hydroxylase                               | 0,76 | 0,0029 |
| 1452684_at   | Akt1s1    | AKT1 substrate 1 (proline-rich)                         | 0,76 | 0,0451 |
| 1421873_s_at | Rab24     | RAB24, member RAS oncogene family                       | 0,76 | 0,0040 |
| 1456569_x_at | Gsn       | gelsolin                                                | 0,76 | 0,0019 |
|              |           | solute carrier family 5 (sodium/glucose cotransporter), |      |        |
| 1452136_at   | Slc5a9    | member 9                                                | 0,76 | 0,0213 |
| 1451542_at   | Ssbp2     | single-stranded DNA binding protein 2                   | 0,76 | 0,0147 |
| 1419687_at   | Macrocl1  | MACRO domain containing 1                               | 0,76 | 0,0018 |
| 1424282_at   | Pet112I   | PET112-like (yeast)                                     | 0,76 | 0,0029 |
| 1421962_at   | Dnajb5    | DnaJ (Hsp40) homolog, subfamily B, member 5             | 0,76 | 0,0131 |

|              |           |                                                                                                               |      |        |
|--------------|-----------|---------------------------------------------------------------------------------------------------------------|------|--------|
| 1457059_at   | Zfp438    | zinc finger protein 438                                                                                       | 0,76 | 0,0311 |
| 1416934_at   | Mtm1      | X-linked myotubular myopathy gene 1                                                                           | 0,76 | 0,0242 |
| 1438924_x_at | Fibp      | fibroblast growth factor (acidic) intracellular binding protein                                               | 0,76 | 0,0300 |
| 1425808_a_at | Myocd     | myocardin                                                                                                     | 0,76 | 0,0450 |
| 1452116_s_at | Atf2      | activating transcription factor 2                                                                             | 0,76 | 0,0038 |
| 1419757_at   | Pitpmn2   | phosphatidylinositol transfer protein, membrane-associated 2                                                  | 0,76 | 0,0102 |
| 1423690_s_at | Gpsm1     | G-protein signalling modulator 1 (AGS3-like, <i>C. elegans</i> )                                              | 0,76 | 0,0013 |
| 1448445_at   | Acp6      | acid phosphatase 6, lysophosphatidic                                                                          | 0,76 | 0,0052 |
| 1427226_at   | Epn2      | epsin 2                                                                                                       | 0,76 | 0,0294 |
| 1424276_at   | Snx16     | sorting nexin 16                                                                                              | 0,76 | 0,0455 |
| 1437697_at   | Rad23a    | RAD23a homolog ( <i>S. cerevisiae</i> )                                                                       | 0,76 | 0,0488 |
| 1417138_s_at | Polr2e    | polymerase (RNA) II (DNA directed) polypeptide E                                                              | 0,76 | 0,0389 |
| 1460548_a_at | Eral1     | Era (G-protein)-like 1 ( <i>E. coli</i> )                                                                     | 0,76 | 0,0054 |
| 1422975_at   | Mme       | membrane metallo endopeptidase                                                                                | 0,76 | 0,0341 |
| 1422383_at   | NA        | NA                                                                                                            | 0,76 | 0,0432 |
| 1455734_at   | Crbn      | cereblon                                                                                                      | 0,76 | 0,0226 |
| 1438452_at   | Neb1      | nebulin                                                                                                       | 0,76 | 0,0204 |
| 1451665_a_at | Ap4s1     | adaptor-related protein complex AP-4, sigma 1                                                                 | 0,76 | 0,0031 |
| 1421583_at   | Creb1     | cAMP responsive element binding protein 1                                                                     | 0,76 | 0,0291 |
| 1427758_x_at | Igh-6     | immunoglobulin heavy chain 6 (heavy chain of IgM)                                                             | 0,76 | 0,0370 |
| 1444028_s_at | Dock9     | dedicator of cytokinesis 9                                                                                    | 0,76 | 0,0014 |
| 1418286_a_at | Efnb1     | ephrin B1                                                                                                     | 0,76 | 0,0168 |
| 1457696_at   | Rilp      | Rab interacting lysosomal protein                                                                             | 0,76 | 0,0195 |
| 1427130_x_at | 02Rik     | RIKEN cDNA 1700021K02 gene                                                                                    | 0,76 | 0,0078 |
| 1422001_at   | Inhbc     | inhibin beta-C                                                                                                | 0,76 | 0,0320 |
| 1444502_at   | Pet112l   | PET112-like (yeast)                                                                                           | 0,76 | 0,0158 |
| 1417161_at   | Cdk2ap2   | CDK2-associated protein 2                                                                                     | 0,76 | 0,0015 |
| 1451222_at   | Btf3l4    | basic transcription factor 3-like 4                                                                           | 0,76 | 0,0129 |
| 1437410_at   | Aldh2     | aldehyde dehydrogenase 2, mitochondrial                                                                       | 0,76 | 0,0452 |
| 1456559_at   | Emx2os    | empty spiracles homolog 2 ( <i>Drosophila</i> ) opposite strand                                               | 0,76 | 0,0272 |
| 1435986_x_at | Pcp4l1    | Purkinje cell protein 4-like 1                                                                                | 0,76 | 0,0152 |
| 1438479_at   | Zfp213    | zinc finger protein 213                                                                                       | 0,76 | 0,0435 |
| 1422121_at   | Oprd1     | opioid receptor, delta 1                                                                                      | 0,76 | 0,0288 |
| 1425833_a_at | Hpca      | hippocalcin                                                                                                   | 0,76 | 0,0362 |
| 1457355_at   | Pnpla8    | patatin-like phospholipase domain containing 8 serine (or cysteine) peptidase inhibitor, clade A, member      | 0,76 | 0,0137 |
| 1421556_at   | Serpina3a | 3A                                                                                                            | 0,76 | 0,0070 |
| 1451274_at   | Ogdh      | oxoglutarate dehydrogenase (lipoamide)                                                                        | 0,76 | 0,0056 |
| 1421909_at   | Tcf20     | transcription factor 20                                                                                       | 0,76 | 0,0437 |
| 1416930_at   | Ly6d      | lymphocyte antigen 6 complex, locus D                                                                         | 0,76 | 0,0366 |
| 1426961_at   | Phf20     | PHD finger protein 20                                                                                         | 0,76 | 0,0149 |
| 1423659_a_at | Tbc1d17   | TBC1 domain family, member 17                                                                                 | 0,76 | 0,0270 |
| 1439232_at   | NA        | NA                                                                                                            | 0,76 | 0,0045 |
| 1452625_at   | Kctd2     | potassium channel tetramerisation domain containing 2                                                         | 0,76 | 0,0296 |
| 1416842_at   | Gstm5     | glutathione S-transferase, mu 5                                                                               | 0,76 | 0,0187 |
| 1423999_at   | Abl1      | c-abl oncogene 1, receptor tyrosine kinase                                                                    | 0,76 | 0,0245 |
| 1428181_at   | Etfb      | electron transferring flavoprotein, beta polypeptide ankyrin repeat and sterile alpha motif domain containing | 0,76 | 0,0011 |
| 1457303_at   | Anks3     | 3                                                                                                             | 0,76 | 0,0201 |
| 1450289_at   | Foxd2     | forkhead box D2                                                                                               | 0,76 | 0,0187 |
| 1439830_at   | Map3k5    | mitogen-activated protein kinase kinase kinase 5                                                              | 0,76 | 0,0020 |
| 1436599_at   | NA        | NA                                                                                                            | 0,76 | 0,0417 |
| 1438638_x_at | Fam116b   | family with sequence similarity 116, member B                                                                 | 0,76 | 0,0168 |

|              |           |                                                                     |      |        |
|--------------|-----------|---------------------------------------------------------------------|------|--------|
| 1424280_at   | Mospd1    | motile sperm domain containing 1                                    | 0,76 | 0,0364 |
| 1440285_at   | Ppp1r9a   | protein phosphatase 1, regulatory (inhibitor) subunit 9A            | 0,76 | 0,0455 |
| 1460674_at   | Paqr7     | progesterin and adipoQ receptor family member VII                   | 0,76 | 0,0113 |
| 1450848_at   | Dap3      | death associated protein 3                                          | 0,76 | 0,0014 |
| 1418851_at   | Trim39    | tripartite motif-containing 39                                      | 0,76 | 0,0371 |
|              | 4832428D  |                                                                     |      |        |
| 1458635_at   | 23Rik     | RIKEN cDNA 4832428D23 gene                                          | 0,76 | 0,0238 |
| 1449365_at   | S1pr5     | sphingosine-1-phosphate receptor 5                                  | 0,76 | 0,0062 |
| 1424026_s_at | BC013529  | cDNA sequence BC013529                                              | 0,77 | 0,0088 |
|              |           | glutathione transferase zeta 1 (maleylacetoacetate isomerase)       |      |        |
| 1427552_a_at | Gstz1     | Tia1 cytotoxic granule-associated RNA binding protein-like 1        | 0,77 | 0,0220 |
| 1452821_at   | Tial1     |                                                                     | 0,77 | 0,0425 |
| 1426843_at   | Atg2a     | ATG2 autophagy related 2 homolog A (S. cerevisiae)                  | 0,77 | 0,0445 |
|              | 1190017O  |                                                                     |      |        |
| 1417402_at   | 12Rik     | RIKEN cDNA 1190017O12 gene                                          | 0,77 | 0,0016 |
|              |           | KH domain containing, RNA binding, signal transduction associated 3 |      |        |
| 1453317_a_at | Khdrbs3   |                                                                     | 0,77 | 0,0466 |
| 1434565_at   | Cgrrf1    | cell growth regulator with ring finger domain 1                     | 0,77 | 0,0339 |
| 1434604_at   | Eif5b     | eukaryotic translation initiation factor 5B                         | 0,77 | 0,0447 |
|              | 4930448K  |                                                                     |      |        |
| 1433343_at   | 20Rik     | RIKEN cDNA 4930448K20 gene                                          | 0,77 | 0,0158 |
| 1460196_at   | Cbr1      | carbonyl reductase 1                                                | 0,77 | 0,0132 |
| 1450306_at   | Zp1       | zona pellucida glycoprotein 1                                       | 0,77 | 0,0152 |
| 1433179_at   | Morn1     | MORN repeat containing 1                                            | 0,77 | 0,0152 |
| 1417908_s_at | Ube2l3    | ubiquitin-conjugating enzyme E2L 3                                  | 0,77 | 0,0327 |
| 1434168_at   | Peo1      | progressive external ophthalmoplegia 1 (human)                      | 0,77 | 0,0026 |
| 1424064_at   | Rab1b     | RAB1B, member RAS oncogene family                                   | 0,77 | 0,0315 |
| 1450561_a_at | Surf1     | surfeit gene 1                                                      | 0,77 | 0,0036 |
| 1437371_at   | Fam160a1  | family with sequence similarity 160, member A1                      | 0,77 | 0,0459 |
|              | 1110001A  |                                                                     |      |        |
| 1435755_at   | 16Rik     | RIKEN cDNA 1110001A16 gene                                          | 0,77 | 0,0101 |
| 1422719_s_at | Nup50     | nucleoporin 50                                                      | 0,77 | 0,0473 |
| 1438058_s_at | Ptov1     | prostate tumor over expressed gene 1                                | 0,77 | 0,0101 |
| 1452095_a_at | H47       | histocompatibility 47                                               | 0,77 | 0,0049 |
|              |           | cholinergic receptor, nicotinic, beta polypeptide 2 (neuronal)      |      |        |
| 1436428_at   | Chrbn2    |                                                                     | 0,77 | 0,0172 |
| 1455084_x_at | Shmt2     | serine hydroxymethyltransferase 2 (mitochondrial)                   | 0,77 | 0,0192 |
| 1416775_at   | Atp5sl    | ATP5S-like                                                          | 0,77 | 0,0284 |
| 1450187_a_at | Galt      | galactose-1-phosphate uridyl transferase                            | 0,77 | 0,0428 |
|              | 2010320M  |                                                                     |      |        |
| 1434792_at   | 18Rik     | RIKEN cDNA 2010320M18 gene                                          | 0,77 | 0,0468 |
|              |           | nardilysin, N-arginine dibasic convertase, NRD convertase 1         |      |        |
| 1424391_at   | Nrd1      |                                                                     | 0,77 | 0,0058 |
| 1417516_at   | Ddit3     | DNA-damage inducible transcript 3                                   | 0,77 | 0,0292 |
|              | 2010011I2 |                                                                     |      |        |
| 1451450_at   | 0Rik      | RIKEN cDNA 2010011I20 gene                                          | 0,77 | 0,0224 |
| 1457271_at   | Gm131     | gene model 131, (NCBI)                                              | 0,77 | 0,0117 |
|              |           | mitochondrial rRNA methyltransferase 1 homolog (S. cerevisiae)      |      |        |
| 1424219_at   | Mrm1      |                                                                     | 0,77 | 0,0415 |
| 1417907_at   | Ube2l3    | ubiquitin-conjugating enzyme E2L 3                                  | 0,77 | 0,0354 |
| 1433905_at   | Akap7     | A kinase (PRKA) anchor protein 7                                    | 0,77 | 0,0130 |
| 1423456_at   | Bzw2      | basic leucine zipper and W2 domains 2                               | 0,77 | 0,0028 |
| 1460434_at   | Fundc2    | FUN14 domain containing 2                                           | 0,77 | 0,0045 |
| 1454976_at   | Sod2      | superoxide dismutase 2, mitochondrial                               | 0,77 | 0,0417 |
|              |           | endonuclease/exonuclease/phosphatase family domain containing 1     |      |        |
| 1417877_at   | Eepd1     |                                                                     | 0,77 | 0,0451 |
| 1443833_at   | NA        | NA                                                                  | 0,77 | 0,0393 |

|              |                               |                                                                                                                                 |      |        |
|--------------|-------------------------------|---------------------------------------------------------------------------------------------------------------------------------|------|--------|
| 1423641_s_at | Cnot7<br>1110032A             | CCR4-NOT transcription complex, subunit 7                                                                                       | 0,77 | 0,0291 |
| 1428520_at   | 13Rik                         | RIKEN cDNA 1110032A13 gene                                                                                                      | 0,77 | 0,0142 |
| 1417241_at   | Amz2                          | archaelysin family metalloproteinase 2                                                                                          | 0,77 | 0,0008 |
| 1423663_at   | Ficn                          | folliculin                                                                                                                      | 0,77 | 0,0312 |
| 1418657_at   | Ino80b                        | INO80 complex subunit B                                                                                                         | 0,77 | 0,0105 |
| 1423733_a_at | Fiz1                          | Flt3 interacting zinc finger protein 1                                                                                          | 0,77 | 0,0227 |
| 1422103_a_at | Stat5b                        | signal transducer and activator of transcription 5B                                                                             | 0,77 | 0,0069 |
| 1424288_at   | Mepce                         | methylphosphate capping enzyme                                                                                                  | 0,77 | 0,0249 |
| 1455640_a_at | Txn2                          | thioredoxin 2                                                                                                                   | 0,77 | 0,0021 |
| 1438685_at   | Zmym6                         | zinc finger, MYM-type 6                                                                                                         | 0,77 | 0,0245 |
| 1418202_a_at | Wiz                           | widely-interspaced zinc finger motifs                                                                                           | 0,77 | 0,0017 |
| 1451696_at   | Zfp64                         | zinc finger protein 64                                                                                                          | 0,77 | 0,0260 |
| 1453232_at   | Calr3                         | calreticulin 3                                                                                                                  | 0,77 | 0,0447 |
| 1441826_x_at | NA                            | NA                                                                                                                              | 0,77 | 0,0026 |
| 1453342_at   | Cdc40                         | cell division cycle 40 homolog (yeast)                                                                                          | 0,77 | 0,0015 |
| 1460337_at   | Sh3kbp1<br>ENSMUS<br>G0000005 | SH3-domain kinase binding protein 1                                                                                             | 0,77 | 0,0178 |
| 1441711_at   | 4421                          | predicted gene, ENSMUSG00000054421                                                                                              | 0,77 | 0,0158 |
| 1418437_a_at | Mlx                           | MAX-like protein X                                                                                                              | 0,77 | 0,0199 |
| 1424021_at   | Arl6ip6                       | ADP-ribosylation factor-like 6 interacting protein 6<br>ArfGAP with RhoGAP domain, ankyrin repeat and PH<br>domain 2            | 0,77 | 0,0442 |
| 1452291_at   | Arap2<br>8430432A             |                                                                                                                                 | 0,77 | 0,0384 |
| 1454506_at   | 02Rik                         | RIKEN cDNA 8430432A02 gene                                                                                                      | 0,77 | 0,0247 |
| 1442446_at   | Zfp523                        | zinc finger protein 523                                                                                                         | 0,77 | 0,0487 |
| 1424180_a_at | Med24                         | mediator complex subunit 24                                                                                                     | 0,77 | 0,0252 |
| 1425178_s_at | Shmt1                         | serine hydroxymethyltransferase 1 (soluble)<br>core-binding factor, runt domain, alpha subunit 2,<br>translocated to, 3 (human) | 0,77 | 0,0062 |
| 1438705_at   | Cbfa2t3                       |                                                                                                                                 | 0,77 | 0,0284 |
| 1445141_at   | Ikbkb                         | inhibitor of kappaB kinase beta                                                                                                 | 0,77 | 0,0303 |
| 1420219_at   | Dnajc21                       | DnaJ (Hsp40) homolog, subfamily C, member 21                                                                                    | 0,77 | 0,0158 |
| 1422467_at   | Ppt1                          | palmitoyl-protein thioesterase 1                                                                                                | 0,77 | 0,0037 |
| 1415986_at   | Clcn4-2                       | chloride channel 4-2                                                                                                            | 0,77 | 0,0031 |
| 1449019_at   | Akap1<br>0610010E             | A kinase (PRKA) anchor protein 1                                                                                                | 0,77 | 0,0010 |
| 1433936_at   | 21Rik                         | RIKEN cDNA 0610010E21 gene                                                                                                      | 0,77 | 0,0447 |
| 1423320_at   | Dnase1l2                      | deoxyribonuclease 1-like 2                                                                                                      | 0,77 | 0,0357 |
| 1436773_x_at | Marveld1                      | MARVEL (membrane-associating) domain containing 1                                                                               | 0,77 | 0,0081 |
| 1434154_at   | Kctd13                        | potassium channel tetramerisation domain containing 13                                                                          | 0,77 | 0,0375 |
| 1440608_at   | NA                            | NA                                                                                                                              | 0,77 | 0,0447 |
| 1435085_at   | NA                            | NA                                                                                                                              | 0,77 | 0,0490 |
| 1453930_at   | 06Rik                         | RIKEN cDNA 1110015M06 gene<br>pleckstrin homology domain containing, family H (with<br>MyTH4 domain) member 1                   | 0,77 | 0,0104 |
| 1452517_at   | Plekhh1                       |                                                                                                                                 | 0,77 | 0,0158 |
| 1452533_at   | Ryr3                          | ryanodine receptor 3                                                                                                            | 0,77 | 0,0137 |
| 1434471_at   | BC003331                      | cDNA sequence BC003331<br>vesicle-associated membrane protein, associated<br>protein B and C                                    | 0,77 | 0,0440 |
| 1436079_s_at | Vapb<br>1700081H              |                                                                                                                                 | 0,77 | 0,0154 |
| 1432772_at   | 04Rik                         | RIKEN cDNA 1700081H04 gene                                                                                                      | 0,77 | 0,0114 |
| 1448095_at   | NA                            | NA                                                                                                                              | 0,77 | 0,0348 |
| 1418508_a_at | Grb2                          | growth factor receptor bound protein 2                                                                                          | 0,77 | 0,0388 |
| 1438011_at   | Pcyl1a                        | phosphate cytidyltransferase 1, choline, alpha isoform                                                                          | 0,77 | 0,0183 |
| 1421197_a_at | Acin1                         | apoptotic chromatin condensation inducer 1                                                                                      | 0,77 | 0,0277 |

|              |          |                                                                      |      |        |
|--------------|----------|----------------------------------------------------------------------|------|--------|
| 1417708_at   | Syt3     | synaptotagmin III                                                    | 0,77 | 0,0178 |
| 1451803_a_at | Vegfb    | vascular endothelial growth factor B                                 | 0,77 | 0,0046 |
| 1419244_a_at | Rab14    | RAB14, member RAS oncogene family                                    | 0,77 | 0,0295 |
| 1452970_at   | Zmym2    | zinc finger, MYM-type 2                                              | 0,77 | 0,0482 |
|              | 2810004N |                                                                      |      |        |
| 1434870_at   | 23Rik    | RIKEN cDNA 2810004N23 gene                                           | 0,77 | 0,0119 |
| 1426602_at   | Araf     | v-raf murine sarcoma 3611 viral oncogene homolog                     | 0,78 | 0,0298 |
| 1428213_at   | Nsmce4a  | non-SMC element 4 homolog A (S. cerevisiae)                          | 0,78 | 0,0122 |
| 1449441_a_at | Wbp1     | WW domain binding protein 1                                          | 0,78 | 0,0088 |
| 1450832_at   | Hoxc5    | homeo box C5                                                         | 0,78 | 0,0254 |
|              |          | ATP-binding cassette, sub-family B (MDR/TAP), member 10              |      |        |
| 1416402_at   | Abcb10   |                                                                      | 0,78 | 0,0061 |
| 1455226_at   | Spnb1    | spectrin beta 1                                                      | 0,78 | 0,0267 |
| 1424467_at   | Phldb1   | pleckstrin homology-like domain, family B, member 1                  | 0,78 | 0,0269 |
| 1422057_at   | Nodal    | nodal                                                                | 0,78 | 0,0478 |
| 1425419_a_at | Raf1     | v-raf-leukemia viral oncogene 1                                      | 0,78 | 0,0380 |
| 1452585_at   | Mrps28   | mitochondrial ribosomal protein S28                                  | 0,78 | 0,0069 |
| 1426679_at   | Zfp706   | zinc finger protein 706                                              | 0,78 | 0,0055 |
|              | 4732418C |                                                                      |      |        |
| 1446473_at   | 07Rik    | RIKEN cDNA 4732418C07 gene                                           | 0,78 | 0,0408 |
|              | 4930564B |                                                                      |      |        |
| 1433036_at   | 12Rik    | RIKEN cDNA 4930564B12 gene                                           | 0,78 | 0,0295 |
|              |          | enoyl Coenzyme A hydratase, short chain, 1, mitochondrial            |      |        |
| 1452341_at   | Echs1    |                                                                      | 0,78 | 0,0099 |
| 1452872_at   | Ank3     | ankyrin 3, epithelial                                                | 0,78 | 0,0166 |
| 1428355_at   | Osbp2    | oxysterol binding protein 2                                          | 0,78 | 0,0221 |
| 1450160_at   | Lif      | leukemia inhibitory factor                                           | 0,78 | 0,0193 |
| 1426499_at   | Sh3glb2  | SH3-domain GRB2-like endophilin B2                                   | 0,78 | 0,0468 |
| 1419137_at   | Shank3   | SH3/ankyrin domain gene 3                                            | 0,78 | 0,0220 |
| 1418699_s_at | Fech     | ferrochelataze                                                       | 0,78 | 0,0254 |
| 1455588_at   | Lym4     | LYR motif containing 4                                               | 0,78 | 0,0076 |
| 1416570_s_at | Gfm1     | G elongation factor, mitochondrial 1                                 | 0,78 | 0,0253 |
| 1427951_s_at | Ccdc28a  | coiled-coil domain containing 28A                                    | 0,78 | 0,0333 |
|              | 9230112E |                                                                      |      |        |
| 1444156_at   | 08Rik    | RIKEN cDNA 9230112E08 gene                                           | 0,78 | 0,0440 |
| 1459859_x_at | Chrac1   | chromatin accessibility complex 1                                    | 0,78 | 0,0064 |
|              |          | glial cell line derived neurotrophic factor family receptor alpha 4  |      |        |
| 1450835_a_at | Gfra4    |                                                                      | 0,78 | 0,0165 |
|              |          | PRP19/PSO4 pre-mRNA processing factor 19 homolog (S. cerevisiae)     |      |        |
| 1449635_at   | Prpf19   |                                                                      | 0,78 | 0,0444 |
| 1425680_a_at | Btrc     | beta-transducin repeat containing protein                            | 0,78 | 0,0107 |
| 1457119_at   | NA       | NA                                                                   | 0,78 | 0,0362 |
| 1436193_at   | Man1c1   | mannosidase, alpha, class 1C, member 1                               | 0,78 | 0,0174 |
| 1421446_at   | Prkcc    | protein kinase C, gamma                                              | 0,78 | 0,0458 |
| 1448027_at   | Ncoa3    | nuclear receptor coactivator 3                                       | 0,78 | 0,0482 |
| 1424836_a_at | Clasp2   | CLIP associating protein 2                                           | 0,78 | 0,0138 |
| 1428744_s_at | Bri3bp   | Bri3 binding protein                                                 | 0,78 | 0,0082 |
|              | E130309D |                                                                      |      |        |
| 1433673_at   | 14Rik    | RIKEN cDNA E130309D14 gene                                           | 0,78 | 0,0284 |
| 1417456_at   | Gnpat    | glyceronephosphate O-acyltransferase                                 | 0,78 | 0,0275 |
|              |          | potassium voltage-gated channel, shaker-related, subfamily, member 6 |      |        |
| 1456954_at   | Kcna6    |                                                                      | 0,78 | 0,0088 |
| 1420679_a_at | Aig1     | androgen-induced 1                                                   | 0,78 | 0,0300 |
| 1417505_s_at | Il11ra1  | interleukin 11 receptor, alpha chain 1                               | 0,78 | 0,0030 |
|              | 1110008L |                                                                      |      |        |
| 1428775_at   | 16Rik    | RIKEN cDNA 1110008L16 gene                                           | 0,78 | 0,0149 |
| 1419653_a_at | Ddx5     | DEAD (Asp-Glu-Ala-Asp) box polypeptide 5                             | 0,78 | 0,0497 |

|              |                    |                                                                                                            |      |        |
|--------------|--------------------|------------------------------------------------------------------------------------------------------------|------|--------|
| 1437285_at   | 1110020G<br>09Rik  | RIKEN cDNA 1110020G09 gene                                                                                 | 0,78 | 0,0471 |
| 1430525_at   | 2310001K<br>24Rik  | RIKEN cDNA 2310001K24 gene                                                                                 | 0,78 | 0,0331 |
| 1417387_at   | Med31<br>9530077C  | mediator of RNA polymerase II transcription, subunit 31 homolog (yeast)                                    | 0,78 | 0,0109 |
| 1440772_x_at | 05Rik              | RIKEN cDNA 9530077C05 gene                                                                                 | 0,78 | 0,0298 |
| 1457391_at   | Vamp3              | vesicle-associated membrane protein 3                                                                      | 0,78 | 0,0170 |
| 1444949_at   | NA                 | NA                                                                                                         | 0,78 | 0,0290 |
| 1427887_at   | Rprd1b             | regulation of nuclear pre-mRNA domain containing 1B                                                        | 0,78 | 0,0073 |
| 1451354_at   | Foxred1            | FAD-dependent oxidoreductase domain containing 1                                                           | 0,78 | 0,0312 |
| 1417283_at   | Lynx1              | Ly6/neurotoxin 1                                                                                           | 0,78 | 0,0133 |
| 1426998_at   | Zfand3<br>2410022L | zinc finger, AN1-type domain 3                                                                             | 0,78 | 0,0192 |
| 1420113_s_at | 05Rik              | RIKEN cDNA 2410022L05 gene                                                                                 | 0,78 | 0,0188 |
| 1438693_at   | Tmem110            | transmembrane protein 110                                                                                  | 0,78 | 0,0455 |
| 1433950_at   | Igsf21             | immunoglobulin superfamily, member 21                                                                      | 0,78 | 0,0151 |
| 1432589_at   | NA                 | NA                                                                                                         | 0,78 | 0,0274 |
| 1451302_at   | 1110012L<br>19Rik  | RIKEN cDNA 1110012L19 gene                                                                                 | 0,78 | 0,0161 |
| 1441949_x_at | Slc39a6            | solute carrier family 39 (metal ion transporter), member 6                                                 | 0,78 | 0,0466 |
| 1456077_x_at | Cdc25c             | cell division cycle 25 homolog C (S. pombe)                                                                | 0,78 | 0,0470 |
| 1426482_at   | Prkrir             | protein-kinase, interferon-inducible double stranded RNA dependent inhibitor, repressor of (P58 repressor) | 0,78 | 0,0392 |
| 1432372_a_at | Spr                | sepiapterin reductase                                                                                      | 0,78 | 0,0173 |
| 1425177_at   | Shmt1              | serine hydroxymethyltransferase 1 (soluble)                                                                | 0,78 | 0,0275 |
| 1417665_a_at | Cpsf1<br>1700029G  | cleavage and polyadenylation specific factor 1                                                             | 0,78 | 0,0335 |
| 1428298_at   | 01Rik              | RIKEN cDNA 1700029G01 gene                                                                                 | 0,78 | 0,0306 |
| 1451935_a_at | Spint2             | serine protease inhibitor, Kunitz type 2                                                                   | 0,78 | 0,0447 |
| 1452028_a_at | Cdh23              | cadherin 23 (otocadherin)                                                                                  | 0,78 | 0,0398 |
| 1442696_at   | NA                 | NA                                                                                                         | 0,78 | 0,0096 |
| 1454731_at   | Myo10              | myosin X                                                                                                   | 0,78 | 0,0188 |
| 1451305_at   | Cby1               | chibby homolog 1 (Drosophila)                                                                              | 0,78 | 0,0216 |
| 1449893_a_at | Lrig1<br>4933434M  | leucine-rich repeats and immunoglobulin-like domains 1                                                     | 0,78 | 0,0370 |
| 1431895_at   | 16Rik              | RIKEN cDNA 4933434M16 gene                                                                                 | 0,78 | 0,0437 |
| 1426586_at   | Slc25a11           | solute carrier family 25 (mitochondrial carrier oxoglutarate carrier), member 11                           | 0,78 | 0,0251 |
| 1416012_at   | Ehd1               | EH-domain containing 1                                                                                     | 0,78 | 0,0487 |
| 1416292_at   | Prdx3              | peroxiredoxin 3                                                                                            | 0,78 | 0,0022 |
| 1440964_s_at | Cbfa2t3            | core-binding factor, runt domain, alpha subunit 2, translocated to, 3 (human)                              | 0,78 | 0,0098 |
| 1448670_at   | Ube2e3             | ubiquitin-conjugating enzyme E2E 3, UBC4/5 homolog (yeast)                                                 | 0,78 | 0,0460 |
| 1451153_a_at | Cyhr1              | cysteine and histidine rich 1                                                                              | 0,78 | 0,0133 |
| 1424345_s_at | Ube2m              | ubiquitin-conjugating enzyme E2M (UBC12 homolog, yeast)                                                    | 0,78 | 0,0201 |
| 1428238_at   | Orc3l              | origin recognition complex, subunit 3-like (S. cerevisiae)                                                 | 0,78 | 0,0363 |
| 1434900_at   | Mkl1               | MKL (megakaryoblastic leukemia)/myocardin-like 1                                                           | 0,78 | 0,0243 |
| 1418529_at   | Osgep              | O-sialoglycoprotein endopeptidase                                                                          | 0,78 | 0,0069 |
| 1454773_at   | Rxra               | retinoid X receptor alpha                                                                                  | 0,78 | 0,0286 |
| 1452660_s_at | Klhl7              | kelch-like 7 (Drosophila)                                                                                  | 0,78 | 0,0409 |
| 1423711_at   | Ndufaf1            | NADH dehydrogenase (ubiquinone) 1 alpha subcomplex, assembly factor 1                                      | 0,78 | 0,0259 |
| 1420848_at   | Sufu               | suppressor of fused homolog (Drosophila)                                                                   | 0,78 | 0,0102 |

|              |          |                                                                                |      |        |
|--------------|----------|--------------------------------------------------------------------------------|------|--------|
| 1449396_at   | Aoc3     | amine oxidase, copper containing 3                                             | 0,78 | 0,0417 |
| 1460436_at   | Ndst1    | N-deacetylase/N-sulfotransferase (heparan glucosaminy) 1                       | 0,78 | 0,0096 |
| 1426046_a_at | Rabggta  | Rab geranylgeranyl transferase, a subunit                                      | 0,78 | 0,0102 |
| 1419786_at   | Ltbp1    | latent transforming growth factor beta binding protein 1                       | 0,78 | 0,0495 |
| 1428428_at   | Abhd11   | abhydrolase domain containing 11                                               | 0,78 | 0,0035 |
| 1423990_at   | Rab28    | RAB28, member RAS oncogene family                                              | 0,78 | 0,0007 |
| 1420735_at   | Gabbr2   | gamma-aminobutyric acid (GABA-C) receptor, subunit rho 2                       | 0,78 | 0,0378 |
| 1436366_at   | Ppp1r15b | protein phosphatase 1, regulatory (inhibitor) subunit 15b                      | 0,78 | 0,0219 |
| 1455139_at   | AI851716 | expressed sequence AI851716                                                    | 0,78 | 0,0434 |
| 1459534_at   | NA       | NA                                                                             | 0,78 | 0,0436 |
| 1455450_at   | Ptpn3    | protein tyrosine phosphatase, non-receptor type 3                              | 0,78 | 0,0159 |
| 1426490_at   | Bfar     | bifunctional apoptosis regulator                                               | 0,78 | 0,0279 |
| 1444127_at   | Asb1     | ankyrin repeat and SOCS box-containing 1                                       | 0,78 | 0,0374 |
| 1458514_at   | AA536887 | expressed sequence AA536887                                                    | 0,78 | 0,0448 |
| 1422333_at   | Cyp21a1  | cytochrome P450, family 21, subfamily a, polypeptide 1                         | 0,78 | 0,0493 |
| 1460687_at   | Setd8    | SET domain containing (lysine methyltransferase) 8                             | 0,78 | 0,0424 |
| 1424153_s_at | Sall4    | sal-like 4 (Drosophila)                                                        | 0,78 | 0,0493 |
| 1450311_at   | Slc8a3   | solute carrier family 8 (sodium/calcium exchanger), member 3                   | 0,78 | 0,0065 |
| 1434261_at   | Sipa1l2  | signal-induced proliferation-associated 1 like 2                               | 0,78 | 0,0489 |
| 1436228_at   | Ctbp2    | C-terminal binding protein 2                                                   | 0,78 | 0,0335 |
| 1457329_at   | NA       | NA                                                                             | 0,78 | 0,0302 |
| 1419839_x_at | Prpf19   | PRP19/PSO4 pre-mRNA processing factor 19 homolog (S. cerevisiae)               | 0,78 | 0,0465 |
| 1443306_at   | NA       | NA                                                                             | 0,78 | 0,0215 |
| 1422060_at   | Parvb    | parvin, beta                                                                   | 0,78 | 0,0080 |
| 1422069_at   | Mc1r     | melanocortin 1 receptor                                                        | 0,79 | 0,0231 |
| 1452615_s_at | Trpt1    | tRNA phosphotransferase 1                                                      | 0,79 | 0,0348 |
| 1453113_at   | Wdsub1   | WD repeat, SAM and U-box domain containing 1                                   | 0,79 | 0,0023 |
| 1434633_at   | Crebbp   | CREB binding protein                                                           | 0,79 | 0,0395 |
| 1418068_at   | Ndufa10  | NADH dehydrogenase (ubiquinone) 1 alpha subcomplex 10                          | 0,79 | 0,0033 |
| 1421533_at   | Slc7a1   | solute carrier family 7 (cationic amino acid transporter, y+ system), member 1 | 0,79 | 0,0304 |
| 1453484_at   | 17Rik    | RIKEN cDNA 1700081D17 gene                                                     | 0,79 | 0,0324 |
| 1448630_a_at | Sdhc     | succinate dehydrogenase complex, subunit C, integral membrane protein          | 0,79 | 0,0096 |
| 1454267_a_at | Prss32   | protease, serine, 32                                                           | 0,79 | 0,0227 |
| 1452053_a_at | Tmem33   | transmembrane protein 33                                                       | 0,79 | 0,0193 |
| 1433524_at   | AU042671 | expressed sequence AU042671                                                    | 0,79 | 0,0302 |
| 1459772_at   | Hps3     | Hermansky-Pudlak syndrome 3 homolog (human)                                    | 0,79 | 0,0335 |
| 1432168_at   | 05Rik    | RIKEN cDNA D730045A05 gene                                                     | 0,79 | 0,0144 |
| 1433250_at   | 07Rik    | RIKEN cDNA 4931409D07 gene                                                     | 0,79 | 0,0207 |
| 1426689_s_at | Sdha     | succinate dehydrogenase complex, subunit A, flavoprotein (Fp)                  | 0,79 | 0,0192 |
| 1423305_at   | Extl1    | exostoses (multiple)-like 1                                                    | 0,79 | 0,0061 |
| 1455777_x_at | Hsd17b4  | hydroxysteroid (17-beta) dehydrogenase 4                                       | 0,79 | 0,0447 |
| 1416148_at   | Laptm4b  | lysosomal-associated protein transmembrane 4B                                  | 0,79 | 0,0339 |
| 1435443_at   | Eya3     | eyes absent 3 homolog (Drosophila)                                             | 0,79 | 0,0346 |
| 1416381_a_at | Prdx5    | peroxiredoxin 5                                                                | 0,79 | 0,0014 |
| 1449333_at   | Sf3a1    | splicing factor 3a, subunit 1                                                  | 0,79 | 0,0282 |
| 1442783_x_at | NA       | NA                                                                             | 0,79 | 0,0358 |

|              |           |                                                           |      |        |
|--------------|-----------|-----------------------------------------------------------|------|--------|
|              | 4932439E  |                                                           |      |        |
| 1439331_at   | 07Rik     | RIKEN cDNA 4932439E07 gene                                | 0,79 | 0,0345 |
| 1416988_at   | Msh2      | mutS homolog 2 (E. coli)                                  | 0,79 | 0,0264 |
|              |           | ATP synthase mitochondrial F1 complex assembly factor     |      |        |
| 1436358_at   | Atpaf1    | 1                                                         | 0,79 | 0,0467 |
|              |           | solute carrier family 25 (mitochondrial thiamine          |      |        |
| 1424316_at   | Slc25a19  | pyrophosphate carrier), member 19                         | 0,79 | 0,0158 |
| 1424025_at   | BC013529  | cDNA sequence BC013529                                    | 0,79 | 0,0042 |
| 1452797_at   | Fastkd3   | FAST kinase domains 3                                     | 0,79 | 0,0171 |
| 1448921_a_at | Mrps9     | mitochondrial ribosomal protein S9                        | 0,79 | 0,0111 |
| 1448321_at   | Smoc1     | SPARC related modular calcium binding 1                   | 0,79 | 0,0404 |
| 1427680_a_at | Nfib      | nuclear factor I/B                                        | 0,79 | 0,0163 |
| 1436067_at   | Zbtb10    | zinc finger and BTB domain containing 10                  | 0,79 | 0,0309 |
| 1428716_at   | Pex1      | peroxisomal biogenesis factor 1                           | 0,79 | 0,0192 |
| 1421901_at   | Eif2ak1   | eukaryotic translation initiation factor 2 alpha kinase 1 | 0,79 | 0,0240 |
| 1452782_a_at | Txn2      | thioredoxin 2                                             | 0,79 | 0,0066 |
|              |           | GCN1 general control of amino-acid synthesis 1-like 1     |      |        |
| 1433713_at   | Gcn1I1    | (yeast)                                                   | 0,79 | 0,0246 |
| 1455918_at   | Adrb3     | adrenergic receptor, beta 3                               | 0,79 | 0,0109 |
| 1435004_at   | Pank4     | pantothenate kinase 4                                     | 0,79 | 0,0356 |
|              | 4932442E  |                                                           |      |        |
| 1453663_at   | 05Rik     | RIKEN cDNA 4932442E05 gene                                | 0,79 | 0,0211 |
|              |           | aldo-keto reductase family 7, member A5 (aflatoxin        |      |        |
| 1438315_x_at | Akr7a5    | aldehyde reductase)                                       | 0,79 | 0,0304 |
| 1438930_s_at | Mecp2     | methyl CpG binding protein 2                              | 0,79 | 0,0437 |
| 1418644_a_at | Stk11     | serine/threonine kinase 11                                | 0,79 | 0,0273 |
| 1436812_at   | Fkrp      | fukutin related protein                                   | 0,79 | 0,0272 |
|              | 4933427G  |                                                           |      |        |
| 1431904_at   | 17Rik     | RIKEN cDNA 4933427G17 gene                                | 0,79 | 0,0098 |
|              | 1700019L  |                                                           |      |        |
| 1433000_at   | 13Rik     | RIKEN cDNA 1700019L13 gene                                | 0,79 | 0,0455 |
| 1438563_s_at | Mrps24    | mitochondrial ribosomal protein S24                       | 0,79 | 0,0447 |
| 1455612_at   | AI848218  | expressed sequence AI848218                               | 0,79 | 0,0479 |
| 1444472_at   | NA        | NA                                                        | 0,79 | 0,0489 |
|              |           | carcinoembryonic antigen-related cell adhesion molecule   |      |        |
| 1460681_at   | Ceacam2   | 2                                                         | 0,79 | 0,0176 |
|              | 2810002N  |                                                           |      |        |
| 1429248_at   | 01Rik     | RIKEN cDNA 2810002N01 gene                                | 0,79 | 0,0104 |
| 1433882_at   | Cnot10    | CCR4-NOT transcription complex, subunit 10                | 0,79 | 0,0412 |
| 1423913_at   | Hectd3    | HECT domain containing 3                                  | 0,79 | 0,0066 |
| 1453795_at   | Fahd2a    | fumarylacetoacetate hydrolase domain containing 2A        | 0,79 | 0,0038 |
|              |           | integrin-linked kinase-associated serine/threonine        |      |        |
| 1452506_a_at | Ilkap     | phosphatase 2C                                            | 0,79 | 0,0415 |
|              |           | myelin and lymphocyte protein, T-cell differentiation     |      |        |
| 1417275_at   | Mal       | protein                                                   | 0,79 | 0,0431 |
|              | D10Jhu81  | DNA segment, Chr 10, Johns Hopkins University 81          |      |        |
| 1449000_at   | e         | expressed                                                 | 0,79 | 0,0045 |
| 1451292_at   | Zfp212    | Zinc finger protein 212                                   | 0,79 | 0,0129 |
| 1421557_x_at | Txn2      | thioredoxin 2                                             | 0,79 | 0,0026 |
| 1435149_at   | Plcg1     | phospholipase C, gamma 1                                  | 0,79 | 0,0052 |
|              | 1110031I0 |                                                           |      |        |
| 1418331_at   | 2Rik      | RIKEN cDNA 1110031I02 gene                                | 0,79 | 0,0096 |
| 1428208_at   | Bcl7a     | B-cell CLL/lymphoma 7A                                    | 0,79 | 0,0330 |
|              | 2310042D  |                                                           |      |        |
| 1429598_at   | 19Rik     | RIKEN cDNA 2310042D19 gene                                | 0,79 | 0,0086 |
| 1429945_at   | Klhl35    | kelch-like 35 (Drosophila)                                | 0,79 | 0,0103 |
| 1419071_at   | Cys1      | cystin 1                                                  | 0,79 | 0,0234 |
| 1449786_at   | Zdhhc7    | zinc finger, DHHC domain containing 7                     | 0,79 | 0,0429 |



|              |            |                                                                               |      |        |
|--------------|------------|-------------------------------------------------------------------------------|------|--------|
| 1418034_at   | Mrps9      | mitochondrial ribosomal protein S9                                            | 0,79 | 0,0104 |
| 1444446_at   | NA         | NA                                                                            | 0,79 | 0,0176 |
| 1425543_s_at | Plekha5    | pleckstrin homology domain containing, family A member 5                      | 0,79 | 0,0069 |
| 1451747_a_at | Atg12      | autophagy-related 12 (yeast)                                                  | 0,79 | 0,0443 |
| 1456289_at   | Hamp2      | hepcidin antimicrobial peptide 2                                              | 0,79 | 0,0284 |
| 1451591_a_at | Efnb1      | ephrin B1                                                                     | 0,79 | 0,0255 |
| 1419210_at   | Hrh1       | histamine receptor H1                                                         | 0,79 | 0,0303 |
| 1439246_x_at | Tnrc6a     | trinucleotide repeat containing 6a                                            | 0,79 | 0,0289 |
| 1416510_at   | Mrpl4      | mitochondrial ribosomal protein L4                                            | 0,79 | 0,0137 |
| 1453311_at   | 10Rik      | RIKEN cDNA 2310008B10 gene                                                    | 0,79 | 0,0466 |
| 1420641_a_at | Sqrdl      | sulfide quinone reductase-like (yeast)                                        | 0,79 | 0,0297 |
| 1440467_at   | 03Rik      | RIKEN cDNA 4922501C03 gene                                                    | 0,79 | 0,0150 |
| 1418578_at   | Dgka       | diacylglycerol kinase, alpha                                                  | 0,79 | 0,0407 |
| 1453271_at   | Phf14      | PHD finger protein 14                                                         | 0,79 | 0,0061 |
| 1434984_at   | Plk5       | polo-like kinase 5 (Drosophila)                                               | 0,79 | 0,0144 |
| 1430494_at   | 08Rik      | RIKEN cDNA 2010005J08 gene                                                    | 0,79 | 0,0046 |
| 1441755_at   | Mapk15     | mitogen-activated protein kinase 15                                           | 0,79 | 0,0445 |
| 1426890_a_at | Rpap1      | RNA polymerase II associated protein 1                                        | 0,79 | 0,0475 |
| 1423144_at   | Pik3ca     | phosphatidylinositol 3-kinase, catalytic, alpha polypeptide                   | 0,79 | 0,0139 |
| 1418582_at   | Cbfa2t3    | core-binding factor, runt domain, alpha subunit 2, translocated to, 3 (human) | 0,79 | 0,0197 |
| 1453587_at   | Ggt6       | gamma-glutamyltransferase 6                                                   | 0,79 | 0,0295 |
| 1451106_at   | Tut1       | terminal uridylyl transferase 1, U6 snRNA-specific                            | 0,79 | 0,0211 |
| 1454848_at   | Ppp1r12c   | protein phosphatase 1, regulatory (inhibitor) subunit 12C                     | 0,79 | 0,0442 |
| 1431002_x_at | Fahd2a     | fumarylacetoacetate hydrolase domain containing 2A                            | 0,80 | 0,0293 |
| 1455042_at   | NA         | NA                                                                            | 0,80 | 0,0345 |
| 1442588_at   | EG329217   | predicted gene, EG329217                                                      | 0,80 | 0,0164 |
| 1427959_at   | Abhd10     | abhydrolase domain containing 10                                              | 0,80 | 0,0374 |
| 1430116_at   | Cyp4f41-ps | cytochrome P450, family 4, subfamily f, polypeptide 41 pseudogene             | 0,80 | 0,0267 |
| 1438416_at   | Med16      | mediator complex subunit 16                                                   | 0,80 | 0,0187 |
| 1453086_at   | 02Rik      | RIKEN cDNA 6330408A02 gene                                                    | 0,80 | 0,0370 |
| 1438895_at   | A430102J   | RIKEN cDNA A430102J17 gene                                                    | 0,80 | 0,0445 |
| 1419013_at   | Gpatch1    | G patch domain containing 1                                                   | 0,80 | 0,0315 |
| 1433299_at   | 22Rik      | RIKEN cDNA 5830461L22 gene                                                    | 0,80 | 0,0498 |
| 1436201_x_at | Mbp        | myelin basic protein                                                          | 0,80 | 0,0303 |
| 1455198_a_at | Ppp2r3a    | protein phosphatase 2 (formerly 2A), regulatory subunit B", alpha             | 0,80 | 0,0205 |
| 1440777_x_at | Ptgr       | prostaglandin F receptor                                                      | 0,80 | 0,0187 |
| 1435464_at   | 1110003E   | RIKEN cDNA 1110003E01 gene                                                    | 0,80 | 0,0137 |
| 1418750_at   | Plxnb3     | plexin B3                                                                     | 0,80 | 0,0475 |
| 1416933_at   | Por        | P450 (cytochrome) oxidoreductase                                              | 0,80 | 0,0282 |
| 1428431_at   | Zcchc24    | zinc finger, CCHC domain containing 24                                        | 0,80 | 0,0217 |
| 1429953_at   | 2210011C   | RIKEN cDNA 2210011C24 gene                                                    | 0,80 | 0,0354 |
| 1435018_at   | 24Rik      | RIKEN cDNA 5930434B04 gene                                                    | 0,80 | 0,0213 |
| 1423146_at   | 5930434B   | RIKEN cDNA 5930434B04 gene                                                    | 0,80 | 0,0213 |
| 1424828_a_at | Hes5       | hairly and enhancer of split 5 (Drosophila)                                   | 0,80 | 0,0232 |
|              | Fh1        | fumarate hydratase 1                                                          | 0,80 | 0,0023 |

|              |                   |                                                                                                                    |      |        |
|--------------|-------------------|--------------------------------------------------------------------------------------------------------------------|------|--------|
| 1425132_at   | Neto1<br>4933417D | neuropilin (NRP) and tolloid (TLL)-like 1                                                                          | 0,80 | 0,0407 |
| 1432197_at   | 19Rik<br>1110005A | RIKEN cDNA 4933417D19 gene                                                                                         | 0,80 | 0,0241 |
| 1451448_a_at | 03Rik             | RIKEN cDNA 1110005A03 gene                                                                                         | 0,80 | 0,0207 |
| 1421708_a_at | Stat6             | signal transducer and activator of transcription 6                                                                 | 0,80 | 0,0474 |
| 1424628_a_at | Ndufv3            | NADH dehydrogenase (ubiquinone) flavoprotein 3                                                                     | 0,80 | 0,0019 |
| 1454212_x_at | Gsdmcl2           | gasdermin C-like 2                                                                                                 | 0,80 | 0,0178 |
| 1417182_at   | Dnaja2            | DnaJ (Hsp40) homolog, subfamily A, member 2                                                                        | 0,80 | 0,0231 |
| 1454873_at   | Zfp775            | zinc finger protein 775                                                                                            | 0,80 | 0,0295 |
| 1424006_at   | Aarsd1            | alanyl-tRNA synthetase domain containing 1                                                                         | 0,80 | 0,0247 |
| 1447124_at   | NA                | NA                                                                                                                 | 0,80 | 0,0381 |
| 1449845_a_at | Ephb4             | Eph receptor B4                                                                                                    | 0,80 | 0,0290 |
| 1429054_at   | Mrpl47            | mitochondrial ribosomal protein L47                                                                                | 0,80 | 0,0386 |
| 1435499_at   | Letm2             | leucine zipper-EF-hand containing transmembrane protein 2                                                          | 0,80 | 0,0433 |
| 1433441_at   | Fbxl5             | F-box and leucine-rich repeat protein 5                                                                            | 0,80 | 0,0386 |
| 1427091_at   | Znfx1             | zinc finger, NFX1-type containing 1                                                                                | 0,80 | 0,0459 |
| 1435949_at   | Zc3h3<br>2010003O | zinc finger CCCH type containing 3                                                                                 | 0,80 | 0,0133 |
| 1429115_at   | 02Rik             | RIKEN cDNA 2010003O02 gene                                                                                         | 0,80 | 0,0380 |
| 1415987_at   | Hdlbp             | high density lipoprotein (HDL) binding protein                                                                     | 0,80 | 0,0321 |
| 1418183_a_at | Cyth1             | cytohesin 1                                                                                                        | 0,80 | 0,0254 |
| 1454982_at   | Argef2            | ADP-ribosylation factor guanine nucleotide-exchange factor 2 (brefeldin A-inhibited)                               | 0,80 | 0,0061 |
| 1446803_at   | NA                | NA                                                                                                                 | 0,80 | 0,0371 |
| 1449104_at   | Upk3a             | uroplakin 3A                                                                                                       | 0,80 | 0,0357 |
| 1448508_at   | Traf3ip2          | TRAF3 interacting protein 2                                                                                        | 0,80 | 0,0236 |
| 1423285_at   | Coch              | coagulation factor C homolog (Limulus polyphemus) protein phosphatase 2, regulatory subunit B (B56), alpha isoform | 0,80 | 0,0496 |
| 1438914_at   | Ppp2r5a           |                                                                                                                    | 0,80 | 0,0293 |
| 1429663_at   | Katnal2           | katanin p60 subunit A-like 2                                                                                       | 0,80 | 0,0324 |
| 1429351_at   | Klhl24            | kelch-like 24 (Drosophila)                                                                                         | 0,80 | 0,0443 |
| 1419428_a_at | Gaa<br>2310047M   | glucosidase, alpha, acid                                                                                           | 0,80 | 0,0435 |
| 1428723_at   | 10Rik             | RIKEN cDNA 2310047M10 gene                                                                                         | 0,80 | 0,0227 |
| 1452265_at   | Clasp1            | CLIP associating protein 1                                                                                         | 0,80 | 0,0053 |
| 1427423_at   | Cyb5rl            | cytochrome b5 reductase-like                                                                                       | 0,80 | 0,0174 |
| 1431721_a_at | Proz              | protein Z, vitamin K-dependent plasma glycoprotein                                                                 | 0,80 | 0,0367 |
| 1447858_x_at | Il4ra             | interleukin 4 receptor, alpha                                                                                      | 0,80 | 0,0500 |
| 1433834_at   | Mrz 06            | membrane-associated ring finger (C3HC4) 6                                                                          | 0,80 | 0,0038 |
| 1425623_a_at | Cbs               | cystathionine beta-synthase                                                                                        | 0,80 | 0,0417 |
| 1444675_at   | AL023051          | expressed sequence AL023051                                                                                        | 0,80 | 0,0302 |
| 1452591_a_at | Fam128b           | family with sequence similarity 128, member B                                                                      | 0,80 | 0,0214 |
| 1452768_at   | Tex261            | testis expressed gene 261                                                                                          | 0,80 | 0,0082 |
| 1439430_x_at | Fam83e            | family with sequence similarity 83, member E                                                                       | 0,80 | 0,0368 |
| 1419484_a_at | Gbas              | glioblastoma amplified sequence                                                                                    | 0,80 | 0,0254 |
| 1447805_s_at | Slu7              | SLU7 splicing factor homolog (S. cerevisiae)                                                                       | 0,80 | 0,0051 |
| 1417046_at   | Tusc4             | tumor suppressor candidate 4                                                                                       | 0,80 | 0,0163 |
| 1423403_at   | Mapkbp1           | mitogen-activated protein kinase binding protein 1                                                                 | 0,80 | 0,0207 |
| 1452601_a_at | Acbd6             | acyl-Coenzyme A binding domain containing 6                                                                        | 0,80 | 0,0243 |
| 1452017_at   | Sox15             | SRY-box containing gene 15                                                                                         | 0,80 | 0,0173 |
| 1440182_at   | Fzd10             | frizzled homolog 10 (Drosophila)                                                                                   | 0,80 | 0,0315 |
| 1427917_s_at | Ssbp3<br>2400009B | single-stranded DNA binding protein 3                                                                              | 0,80 | 0,0055 |
| 1439834_at   | 08Rik             | RIKEN cDNA 2400009B08 gene                                                                                         | 0,80 | 0,0302 |
| 1418342_at   | Rfc1              | replication factor C (activator 1) 1                                                                               | 0,80 | 0,0324 |

|              |          |                                                                                           |      |        |
|--------------|----------|-------------------------------------------------------------------------------------------|------|--------|
| 1460682_s_at | Ceacam2  | carcinoembryonic antigen-related cell adhesion molecule 2                                 | 0,80 | 0,0496 |
| 1435611_x_at | Ela3     | elastase 3, pancreatic                                                                    | 0,80 | 0,0138 |
| 1424322_at   | Apex2    | apurinic/apyrimidinic endonuclease 2                                                      | 0,80 | 0,0077 |
| 1443103_at   | Gpr146   | G protein-coupled receptor 146                                                            | 0,80 | 0,0254 |
| 1436610_at   | Ankrd12  | ankyrin repeat domain 12                                                                  | 0,80 | 0,0178 |
|              | AW01173  |                                                                                           |      |        |
| 1456164_at   | 8        | expressed sequence AW011738                                                               | 0,80 | 0,0254 |
| 1425766_x_at | NA       | NA                                                                                        | 0,80 | 0,0132 |
| 1437192_x_at | Mt2      | metallothionein 2                                                                         | 0,80 | 0,0130 |
| 1416789_at   | Idh3g    | isocitrate dehydrogenase 3 (NAD+), gamma                                                  | 0,80 | 0,0054 |
| 1420950_at   | Znrf1    | zinc and ring finger 1                                                                    | 0,80 | 0,0399 |
| 1435762_at   | Pacs1    | phosphofurin acidic cluster sorting protein 1                                             | 0,80 | 0,0324 |
| 1455896_a_at | Kcnk1    | potassium channel, subfamily K, member 1                                                  | 0,80 | 0,0250 |
| 1421696_at   | Pkhd111  | polycystic kidney and hepatic disease 1-like 1                                            | 0,80 | 0,0312 |
| 1451307_at   | Mrpl14   | mitochondrial ribosomal protein L14                                                       | 0,80 | 0,0453 |
| 1416127_a_at | Dnpep    | aspartyl aminopeptidase                                                                   | 0,80 | 0,0226 |
| 1424108_at   | Glo1     | glyoxalase 1                                                                              | 0,80 | 0,0040 |
| 1423951_at   | Tm2d3    | TM2 domain containing 3                                                                   | 0,80 | 0,0126 |
| 1433624_at   | Bat2l    | HLA-B associated transcript 2-like                                                        | 0,80 | 0,0068 |
|              | 1700094D |                                                                                           |      |        |
| 1429907_at   | 03Rik    | RIKEN cDNA 1700094D03 gene                                                                | 0,80 | 0,0250 |
| 1439848_at   | Bves     | blood vessel epicardial substance                                                         | 0,80 | 0,0357 |
| 1433647_s_at | Rhobtb3  | Rho-related BTB domain containing 3                                                       | 0,80 | 0,0420 |
| 1429862_at   | Pla2g4e  | phospholipase A2, group IVE                                                               | 0,80 | 0,0417 |
| 1421681_at   | Nrg4     | neuregulin 4                                                                              | 0,80 | 0,0182 |
| 1435369_at   | Fastkd5  | FAST kinase domains 5                                                                     | 0,80 | 0,0417 |
| 1451961_a_at | Mbp      | myelin basic protein                                                                      | 0,80 | 0,0200 |
| 1428108_x_at | Tmcc2    | transmembrane and coiled-coil domains 2                                                   | 0,80 | 0,0106 |
| 1458674_at   | NA       | NA                                                                                        | 0,80 | 0,0426 |
| 1448811_at   | Mrpl2    | mitochondrial ribosomal protein L2                                                        | 0,80 | 0,0048 |
| 1423582_at   | Dmrt1    | doublesex and mab-3 related transcription factor 1                                        | 0,80 | 0,0334 |
| 1448525_a_at | Bnip3l   | BCL2/adenovirus E1B interacting protein 3-like                                            | 0,80 | 0,0241 |
| 1456759_at   | NA       | NA                                                                                        | 0,80 | 0,0376 |
|              |          | solute carrier family 5 (sodium iodide symporter), member 5                               |      |        |
| 1422113_at   | Slc5a5   |                                                                                           | 0,80 | 0,0162 |
| 1416883_at   | Clptm1   | cleft lip and palate associated transmembrane protein 1                                   | 0,80 | 0,0196 |
| 1451754_a_at | Wdr45    | WD repeat domain 45                                                                       | 0,80 | 0,0220 |
| 1434465_x_at | Vldlr    | very low density lipoprotein receptor                                                     | 0,81 | 0,0413 |
| 1425800_at   | Rad9b    | RAD9 homolog B (S. cerevisiae)                                                            | 0,81 | 0,0371 |
| 1417000_at   | Abtb1    | ankyrin repeat and BTB (POZ) domain containing 1                                          | 0,81 | 0,0043 |
| 1451609_at   | Tspan33  | tetraspanin 33                                                                            | 0,81 | 0,0466 |
|              |          | tetratricopeptide repeat, ankyrin repeat and coiled-coil containing 1                     |      |        |
| 1452714_at   | Tanc1    |                                                                                           | 0,81 | 0,0305 |
| 1433586_at   | Rgmb     | RGM domain family, member B                                                               | 0,81 | 0,0329 |
| 1435995_at   | Mrpl22   | mitochondrial ribosomal protein L22                                                       | 0,81 | 0,0040 |
|              |          | potassium intermediate/small conductance calcium-activated channel, subfamily N, member 1 |      |        |
| 1449536_at   | Kcnn1    |                                                                                           | 0,81 | 0,0445 |
| 1437037_x_at | Snd1     | staphylococcal nuclease and tudor domain containing 1                                     | 0,81 | 0,0153 |
| 1428494_a_at | Polr2i   | polymerase (RNA) II (DNA directed) polypeptide I                                          | 0,81 | 0,0146 |
| 1428588_a_at | Mrpl41   | mitochondrial ribosomal protein L41                                                       | 0,81 | 0,0348 |
| 1443961_at   | AU017962 | expressed sequence AU017962                                                               | 0,81 | 0,0441 |
| 1426049_a_at | Terf2ip  | telomeric repeat binding factor 2, interacting protein                                    | 0,81 | 0,0443 |
| 1456087_at   | Nfia     | nuclear factor I/A                                                                        | 0,81 | 0,0095 |
| 1454857_at   | Rnf122   | ring finger protein 122                                                                   | 0,81 | 0,0158 |
| 1448247_at   | Bcl7b    | B-cell CLL/lymphoma 7B                                                                    | 0,81 | 0,0048 |

|              |          |                                                                                                            |      |        |
|--------------|----------|------------------------------------------------------------------------------------------------------------|------|--------|
| 1423107_at   | Ube2b    | ubiquitin-conjugating enzyme E2B, RAD6 homology (S. cerevisiae)                                            | 0,81 | 0,0256 |
| 1439289_s_at | Pnmal1   | PNMA-like 1                                                                                                | 0,81 | 0,0401 |
|              | A230051G |                                                                                                            |      |        |
| 1457315_at   | 13Rik    | RIKEN cDNA A230051G13 gene                                                                                 | 0,81 | 0,0197 |
| 1455212_at   | Wdr24    | WD repeat domain 24                                                                                        | 0,81 | 0,0061 |
| 1428207_at   | Bcl7a    | B-cell CLL/lymphoma 7A                                                                                     | 0,81 | 0,0169 |
| 1427392_at   | Dscaml1  | Down syndrome cell adhesion molecule-like 1                                                                | 0,81 | 0,0492 |
| 1426760_at   | Ipo8     | importin 8                                                                                                 | 0,81 | 0,0112 |
| 1460644_at   | Bckdk    | branched chain ketoacid dehydrogenase kinase                                                               | 0,81 | 0,0300 |
| 1427282_a_at | Fxn      | frataxin                                                                                                   | 0,81 | 0,0470 |
| 1432257_at   | Gsdmcl1  | gasdermin C-like 1                                                                                         | 0,81 | 0,0181 |
| 1449113_at   | Gpbp11l  | GC-rich promoter binding protein 1-like 1                                                                  | 0,81 | 0,0192 |
| 1436939_at   | Unc45b   | unc-45 homolog B (C. elegans)                                                                              | 0,81 | 0,0061 |
|              | 4930423C |                                                                                                            |      |        |
| 1433128_at   | 22Rik    | RIKEN cDNA 4930423C22 gene                                                                                 | 0,81 | 0,0359 |
|              |          | FCF1 small subunit (SSU) processome component                                                              |      |        |
| 1452795_at   | Fcf1     | homolog (S. cerevisiae)                                                                                    | 0,81 | 0,0383 |
| 1423712_a_at | Qars     | glutaminyl-tRNA synthetase                                                                                 | 0,81 | 0,0399 |
|              | 5830437K |                                                                                                            |      |        |
| 1432731_at   | 03Rik    | RIKEN cDNA 5830437K03 gene                                                                                 | 0,81 | 0,0137 |
| 1458767_at   | NA       | NA                                                                                                         | 0,81 | 0,0377 |
| 1449099_at   | Lrba     | LPS-responsive beige-like anchor                                                                           | 0,81 | 0,0219 |
| 1449302_at   | Abca2    | ATP-binding cassette, sub-family A (ABC1), member 2                                                        | 0,81 | 0,0424 |
| 1423163_at   | Bat4     | HLA-B associated transcript 4                                                                              | 0,81 | 0,0275 |
| 1438144_x_at | Atxn2    | ataxin 2                                                                                                   | 0,81 | 0,0158 |
| 1424184_at   | Acadvl   | acyl-Coenzyme A dehydrogenase, very long chain immunoglobulin superfamily containing leucine-rich repeat 2 | 0,81 | 0,0479 |
| 1434421_at   | Islr2    | repeat 2                                                                                                   | 0,81 | 0,0440 |
| 1450943_at   | Magohb   | mago-nashi homolog B (Drosophila)                                                                          | 0,81 | 0,0377 |
| 1422394_at   | NA       | NA                                                                                                         | 0,81 | 0,0359 |
| 1415992_at   | Pigo     | phosphatidylinositol glycan anchor biosynthesis, class O                                                   | 0,81 | 0,0151 |
|              | A930028C |                                                                                                            |      |        |
| 1430945_at   | 08Rik    | RIKEN cDNA A930028C08 gene                                                                                 | 0,81 | 0,0201 |
| 1432060_at   | Iqca     | IQ motif containing with AAA domain                                                                        | 0,81 | 0,0284 |
| 1423908_at   | Ndufs8   | NADH dehydrogenase (ubiquinone) Fe-S protein 8                                                             | 0,81 | 0,0111 |
|              | 2010305A |                                                                                                            |      |        |
| 1440769_at   | 19Rik    | RIKEN cDNA 2010305A19 gene                                                                                 | 0,81 | 0,0338 |
| 1444884_at   | Ppt1     | palmitoyl-protein thioesterase 1                                                                           | 0,81 | 0,0293 |
| 1418754_at   | Adcy8    | adenylate cyclase 8                                                                                        | 0,81 | 0,0442 |
| 1442238_a_at | Kif6     | kinesin family member 6                                                                                    | 0,81 | 0,0346 |
|              |          | solute carrier family 17 (sodium-dependent inorganic phosphate cotransporter), member 6                    |      |        |
| 1418610_at   | Slc17a6  | phosphate cotransporter), member 6                                                                         | 0,81 | 0,0478 |
| 1419547_at   | Fahd1    | fumarylacetoacetate hydrolase domain containing 1                                                          | 0,81 | 0,0366 |
| 1444115_at   | NA       | NA                                                                                                         | 0,81 | 0,0407 |
| 1417737_at   | Mrps31   | mitochondrial ribosomal protein S31                                                                        | 0,81 | 0,0254 |
| 1451059_at   | Zfp474   | zinc finger protein 474                                                                                    | 0,81 | 0,0207 |
| 1426708_at   | Antxr2   | anthrax toxin receptor 2                                                                                   | 0,81 | 0,0267 |
|              |          | ceroid lipofuscinosis, neuronal 3, juvenile (Batten, Spielmeyer-Vogt disease)                              |      |        |
| 1417551_at   | Cln3     |                                                                                                            | 0,81 | 0,0318 |
| 1459271_at   | NA       | NA                                                                                                         | 0,81 | 0,0314 |
| 1458393_at   | Srr      | serine racemase                                                                                            | 0,81 | 0,0321 |
| 1431354_a_at | Fars2    | phenylalanine-tRNA synthetase 2 (mitochondrial)                                                            | 0,81 | 0,0177 |
| 1429539_at   | Bcl2l13  | BCL2-like 13 (apoptosis facilitator)                                                                       | 0,81 | 0,0329 |
| 1440323_at   | Syt2     | synaptotagmin II                                                                                           | 0,81 | 0,0437 |
| 1418956_at   | Tssk6    | testis-specific serine kinase 6                                                                            | 0,81 | 0,0335 |
| 1441738_at   | NA       | NA                                                                                                         | 0,81 | 0,0088 |

|              |          |                                                                                                                           |      |        |
|--------------|----------|---------------------------------------------------------------------------------------------------------------------------|------|--------|
| 1448432_at   | Plcd1    | phospholipase C, delta 1                                                                                                  | 0,81 | 0,0195 |
| 1431190_x_at | Fahd2a   | fumarylacetoacetate hydrolase domain containing 2A                                                                        | 0,81 | 0,0074 |
| 1438289_a_at | Sumo1    | SMT3 suppressor of mif two 3 homolog 1 (yeast)                                                                            | 0,81 | 0,0470 |
|              | 1810020G |                                                                                                                           |      |        |
| 1450895_a_at | 14Rik    | RIKEN cDNA 1810020G14 gene                                                                                                | 0,81 | 0,0070 |
| 1436814_at   | NA       | NA                                                                                                                        | 0,81 | 0,0348 |
| 1429312_s_at | Ror1     | receptor tyrosine kinase-like orphan receptor 1                                                                           | 0,81 | 0,0240 |
| 1417142_at   | Fam120b  | family with sequence similarity 120, member B                                                                             | 0,81 | 0,0312 |
| 1427790_at   | Adam1a   | a disintegrin and metallopeptidase domain 1a                                                                              | 0,81 | 0,0146 |
| 1442982_at   | Ccdc66   | coiled-coil domain containing 66                                                                                          | 0,81 | 0,0346 |
| 1459660_at   | NA       | NA                                                                                                                        | 0,81 | 0,0061 |
| 1415714_a_at | Snrnp27  | small nuclear ribonucleoprotein 27 (U4/U6.U5)                                                                             | 0,81 | 0,0270 |
| 1435586_at   | Pcid2    | PCI domain containing 2                                                                                                   | 0,81 | 0,0173 |
|              | 4930428F |                                                                                                                           |      |        |
| 1453390_at   | 12Rik    | RIKEN cDNA 4930428F12 gene                                                                                                | 0,81 | 0,0179 |
| 1424273_at   | Cyp2c70  | cytochrome P450, family 2, subfamily c, polypeptide 70                                                                    | 0,81 | 0,0442 |
| 1417118_a_at | Ard1a    | ARD1 homolog A, N-acetyltransferase ( <i>S. cerevisiae</i> )                                                              | 0,81 | 0,0280 |
| 1427509_at   | Baiap3   | BAI1-associated protein 3                                                                                                 | 0,81 | 0,0175 |
| 1423780_at   | Hibadh   | 3-hydroxyisobutyrate dehydrogenase                                                                                        | 0,82 | 0,0295 |
| 1455018_at   | Lmtk2    | lemur tyrosine kinase 2                                                                                                   | 0,82 | 0,0260 |
| 1459848_x_at | Dbh      | dopamine beta hydroxylase                                                                                                 | 0,82 | 0,0435 |
| 1426902_at   | Coq6     | coenzyme Q6 homolog (yeast)                                                                                               | 0,82 | 0,0048 |
| 1459300_at   | NA       | NA                                                                                                                        | 0,82 | 0,0272 |
| 1455958_s_at | Pptc7    | PTC7 protein phosphatase homolog ( <i>S. cerevisiae</i> )                                                                 | 0,82 | 0,0040 |
| 1438409_at   | Cep63    | centrosomal protein 63                                                                                                    | 0,82 | 0,0147 |
| 1445677_x_at | Slc35f2  | solute carrier family 35, member F2                                                                                       | 0,82 | 0,0340 |
| 1419713_at   | Atp8b3   | ATPase, class I, type 8B, member 3                                                                                        | 0,82 | 0,0296 |
| 1446093_at   | NA       | NA                                                                                                                        | 0,82 | 0,0205 |
| 1450340_a_at | Clcnkb   | chloride channel Kb                                                                                                       | 0,82 | 0,0302 |
| 1424645_at   | Tnrc6c   | trinucleotide repeat containing 6C                                                                                        | 0,82 | 0,0420 |
| 1452835_a_at | Polrmt   | polymerase (RNA) mitochondrial (DNA directed)                                                                             | 0,82 | 0,0209 |
| 1452216_at   | Mcat     | malonyl CoA:ACP acyltransferase (mitochondrial)                                                                           | 0,82 | 0,0257 |
| 1423803_s_at | Gltscr2  | glioma tumor suppressor candidate region 2<br>ATP-binding cassette, sub-family C (CFTR/MRP),<br>member 5                  | 0,82 | 0,0296 |
| 1427565_a_at | Abcc5    |                                                                                                                           | 0,82 | 0,0293 |
| 1455684_at   | Map3k9   | mitogen-activated protein kinase kinase kinase 9                                                                          | 0,82 | 0,0326 |
| 1416657_at   | Akt1     | thymoma viral proto-oncogene 1                                                                                            | 0,82 | 0,0449 |
| 1419575_s_at | Zfp292   | zinc finger protein 292<br>inhibitor of kappa light polypeptide enhancer in B-cells,<br>kinase complex-associated protein | 0,82 | 0,0468 |
| 1451254_at   | lkbkap   |                                                                                                                           | 0,82 | 0,0271 |
| 1415928_a_at | Map1lc3b | microtubule-associated protein 1 light chain 3 beta                                                                       | 0,82 | 0,0088 |
| 1447990_at   | C76332   | expressed sequence C76332                                                                                                 | 0,82 | 0,0174 |
| 1417977_at   | Eif4e3   | eukaryotic translation initiation factor 4E member 3                                                                      | 0,82 | 0,0069 |
| 1443849_x_at | Urod     | uroporphyrinogen decarboxylase                                                                                            | 0,82 | 0,0411 |
| 1416207_at   | Taz      | tafazzin                                                                                                                  | 0,82 | 0,0276 |
| 1439222_at   | Morc2b   | microrchidia 2B                                                                                                           | 0,82 | 0,0452 |
| 1428862_at   | Ttc17    | tetratricopeptide repeat domain 17                                                                                        | 0,82 | 0,0357 |
|              | 4930554H |                                                                                                                           |      |        |
| 1454020_at   | 23Rik    | RIKEN cDNA 4930554H23 gene                                                                                                | 0,82 | 0,0235 |
| 1417535_at   | Fbxo25   | F-box protein 25                                                                                                          | 0,82 | 0,0061 |
| 1428898_at   | Mon1a    | MON1 homolog A (yeast)                                                                                                    | 0,82 | 0,0198 |
| 1427928_s_at | Pigu     | phosphatidylinositol glycan anchor biosynthesis, class U                                                                  | 0,82 | 0,0227 |
|              | Gadd45gi | growth arrest and DNA-damage-inducible, gamma                                                                             |      |        |
| 1417619_at   | p1       | interacting protein 1                                                                                                     | 0,82 | 0,0169 |
| 1427939_s_at | Mycbp    | c-myc binding protein                                                                                                     | 0,82 | 0,0295 |
| 1459029_at   | Pak1     | p21 (CDKN1A)-activated kinase 1                                                                                           | 0,82 | 0,0450 |

|              |           |                                                                                                        |      |        |
|--------------|-----------|--------------------------------------------------------------------------------------------------------|------|--------|
| 1421903_at   | Med29     | mediator complex subunit 29                                                                            | 0,82 | 0,0440 |
| 1448563_at   | Phb       | prohibitin                                                                                             | 0,82 | 0,0145 |
| 1446849_at   | NA        | NA                                                                                                     | 0,82 | 0,0275 |
|              | C030008P  |                                                                                                        |      |        |
| 1430879_at   | 14Rik     | RIKEN cDNA C030008P14 gene                                                                             | 0,82 | 0,0199 |
| 1432823_at   | Sypl2     | synaptophysin-like 2                                                                                   | 0,82 | 0,0199 |
| 1437779_at   | Foxh1     | forkhead box H1                                                                                        | 0,82 | 0,0424 |
| 1451252_at   | Irf2bp1   | interferon regulatory factor 2 binding protein 1                                                       | 0,82 | 0,0493 |
| 1448690_at   | Kcnk1     | potassium channel, subfamily K, member 1                                                               | 0,82 | 0,0430 |
| 1421168_at   | Abcg3     | ATP-binding cassette, sub-family G (WHITE), member 3                                                   | 0,82 | 0,0245 |
| 1427955_a_at | Deb1      | differentially expressed in B16F10 1                                                                   | 0,82 | 0,0105 |
| 1433319_at   | Sh3bgr    | SH3-binding domain glutamic acid-rich protein tumor necrosis factor receptor superfamily, member 14    | 0,82 | 0,0446 |
| 1452425_at   | Tnfrsf14  | (herpesvirus entry mediator)                                                                           | 0,82 | 0,0378 |
| 1432099_a_at | Prodh2    | proline dehydrogenase (oxidase) 2                                                                      | 0,82 | 0,0466 |
| 1453363_at   | Cacng2    | calcium channel, voltage-dependent, gamma subunit 2                                                    | 0,82 | 0,0489 |
| 1415685_at   | Mtif2     | mitochondrial translational initiation factor 2                                                        | 0,82 | 0,0442 |
| 1424676_s_at | Sec14l4   | SEC14-like 4 ( <i>S. cerevisiae</i> )                                                                  | 0,82 | 0,0365 |
| 1460697_s_at | Snrnp27   | small nuclear ribonucleoprotein 27 (U4/U6.U5)                                                          | 0,82 | 0,0453 |
| 1451121_a_at | Gltscr2   | glioma tumor suppressor candidate region gene 2                                                        | 0,82 | 0,0336 |
| 1460194_at   | Phyh      | phytanoyl-CoA hydroxylase                                                                              | 0,82 | 0,0114 |
| 1455131_at   | Opa3      | optic atrophy 3 (human)                                                                                | 0,82 | 0,0370 |
| 1422566_at   | Tcfef     | transcription factor EB                                                                                | 0,82 | 0,0137 |
|              |           | MAK10 homolog, amino-acid N-acetyltransferase subunit, ( <i>S. cerevisiae</i> )                        |      |        |
| 1454657_s_at | Mak10     |                                                                                                        | 0,82 | 0,0184 |
| 1428448_a_at | Gtf3c2    | general transcription factor IIIC, polypeptide 2, beta                                                 | 0,82 | 0,0401 |
| 1424120_at   | Rnf8      | ring finger protein 8                                                                                  | 0,82 | 0,0181 |
| 1458989_at   | NA        | NA                                                                                                     | 0,82 | 0,0296 |
|              | 4833417J  |                                                                                                        |      |        |
| 1433286_at   | 16Rik     | RIKEN cDNA 4833417J16 gene                                                                             | 0,82 | 0,0133 |
| 1438759_x_at | Adi1      | acireductone dioxygenase 1                                                                             | 0,82 | 0,0179 |
| 1418332_a_at | Agtpbp1   | ATP/GTP binding protein 1                                                                              | 0,82 | 0,0414 |
| 1424595_at   | F11r      | F11 receptor                                                                                           | 0,82 | 0,0306 |
|              | 0610012G  |                                                                                                        |      |        |
| 1417002_at   | 03Rik     | RIKEN cDNA 0610012G03 gene                                                                             | 0,82 | 0,0084 |
| 1449129_a_at | Kcnip3    | Kv channel interacting protein 3, calsenilin                                                           | 0,82 | 0,0394 |
| 1417683_at   | Diablo    | diablo homolog ( <i>Drosophila</i> )                                                                   | 0,82 | 0,0058 |
| 1423907_a_at | Ndufs8    | NADH dehydrogenase (ubiquinone) Fe-S protein 8 mediator of RNA polymerase II transcription, subunit 25 | 0,82 | 0,0087 |
| 1453197_at   | Med25     | homolog (yeast)                                                                                        | 0,82 | 0,0417 |
| 1460545_at   | Thrap3    | thyroid hormone receptor associated protein 3                                                          | 0,82 | 0,0265 |
| 1457387_at   | Repin1    | replication initiator 1                                                                                | 0,82 | 0,0442 |
| 1425143_a_at | Ndufs1    | NADH dehydrogenase (ubiquinone) Fe-S protein 1                                                         | 0,82 | 0,0197 |
| 1424040_at   | Mtap7d1   | microtubule-associated protein 7 domain containing 1                                                   | 0,82 | 0,0429 |
| 1452637_a_at | Bola1     | bolA-like 1 ( <i>E. coli</i> )                                                                         | 0,82 | 0,0162 |
|              | 10004166  |                                                                                                        |      |        |
| 1439921_at   | 0         | predicted gene, 100041660                                                                              | 0,82 | 0,0258 |
|              | 4930455M  |                                                                                                        |      |        |
| 1460529_at   | 05Rik     | RIKEN cDNA 4930455M05 gene                                                                             | 0,82 | 0,0199 |
|              | C530005A  |                                                                                                        |      |        |
| 1443944_at   | 16Rik     | RIKEN cDNA C530005A16 gene                                                                             | 0,82 | 0,0152 |
| 1457171_at   | NA        | NA                                                                                                     | 0,82 | 0,0443 |
|              | 170002011 |                                                                                                        |      |        |
| 1428411_at   | 4Rik      | RIKEN cDNA 1700020114 gene                                                                             | 0,82 | 0,0264 |
| 1421743_a_at | Pcbp2     | poly(rC) binding protein 2                                                                             | 0,82 | 0,0442 |
| 1427125_s_at | Lrrc41    | leucine rich repeat containing 41                                                                      | 0,83 | 0,0100 |
| 1451102_at   | Cnot8     | CCR4-NOT transcription complex, subunit 8                                                              | 0,83 | 0,0120 |

|              |          |                                                                                                                                      |      |        |
|--------------|----------|--------------------------------------------------------------------------------------------------------------------------------------|------|--------|
| 1436137_at   | Slc6a17  | solute carrier family 6 (neurotransmitter transporter), member 17                                                                    | 0,83 | 0,0379 |
| 1435259_s_at | Tmem141  | transmembrane protein 141                                                                                                            | 0,83 | 0,0225 |
| 1423972_at   | Etfa     | electron transferring flavoprotein, alpha polypeptide                                                                                | 0,83 | 0,0078 |
| 1448277_at   | Pold2    | polymerase (DNA directed), delta 2, regulatory subunit                                                                               | 0,83 | 0,0371 |
| 1437379_x_at | Trap1    | TNF receptor-associated protein 1                                                                                                    | 0,83 | 0,0302 |
| 1449864_at   | Il4      | interleukin 4                                                                                                                        | 0,83 | 0,0098 |
| 1429170_a_at | Mtf1     | metal response element binding transcription factor 1                                                                                | 0,83 | 0,0302 |
| 1426583_at   | Atf2     | activating transcription factor 2                                                                                                    | 0,83 | 0,0203 |
| 1448046_at   | Rabepk   | Rab9 effector protein with kelch motifs                                                                                              | 0,83 | 0,0389 |
| 1416763_at   | Cdc123   | cell division cycle 123 homolog (S. cerevisiae)                                                                                      | 0,83 | 0,0377 |
| 1453994_at   | 16Rik    | RIKEN cDNA C230094A16 gene                                                                                                           | 0,83 | 0,0327 |
| 1416210_at   | Imp3     | IMP3, U3 small nucleolar ribonucleoprotein, homolog (yeast)                                                                          | 0,83 | 0,0180 |
| 1425150_at   | Acnat2   | acyl-coenzyme A amino acid N-acyltransferase 2                                                                                       | 0,83 | 0,0475 |
| 1426761_at   | Aof2     | amine oxidase (flavin containing) domain 2                                                                                           | 0,83 | 0,0168 |
| 1437133_x_at | Akr1b3   | aldo-keto reductase family 1, member B3 (aldose reductase)                                                                           | 0,83 | 0,0493 |
| 1416393_at   | Emg1     | EMG1 nucleolar protein homolog (S. cerevisiae)                                                                                       | 0,83 | 0,0427 |
| 1432184_a_at | 08Rik    | RIKEN cDNA 2610204M08 gene                                                                                                           | 0,83 | 0,0375 |
| 1423883_at   | Acs1     | acyl-CoA synthetase long-chain family member 1                                                                                       | 0,83 | 0,0224 |
| 1449775_x_at | Slc35a4  | solute carrier family 35, member A4                                                                                                  | 0,83 | 0,0300 |
| 1424036_at   | Prpf6    | PRP6 pre-mRNA splicing factor 6 homolog (yeast)                                                                                      | 0,83 | 0,0283 |
| 1417950_a_at | Apoa2    | apolipoprotein A-II                                                                                                                  | 0,83 | 0,0330 |
| 1452934_at   | Tmc5     | transmembrane channel-like gene family 5                                                                                             | 0,83 | 0,0370 |
| 1443210_at   | 8736     | predicted gene, ENSMUSG00000058736                                                                                                   | 0,83 | 0,0224 |
| 1416924_at   | Bri3     | brain protein I3                                                                                                                     | 0,83 | 0,0114 |
| 1438191_a_at | Rnf40    | ring finger protein 40                                                                                                               | 0,83 | 0,0150 |
| 1441600_at   | 13       | hypothetical protein C920021A13                                                                                                      | 0,83 | 0,0443 |
| 1421585_at   | Ccdc103  | coiled-coil domain containing 103                                                                                                    | 0,83 | 0,0103 |
| 1416819_at   | Cdc37    | cell division cycle 37 homolog (S. cerevisiae)                                                                                       | 0,83 | 0,0499 |
| 1436705_at   | Mmgt1    | membrane magnesium transporter 1                                                                                                     | 0,83 | 0,0142 |
| 1459113_at   | NA       | NA                                                                                                                                   | 0,83 | 0,0442 |
| 1449438_at   | Dpm1     | dolichol-phosphate (beta-D) mannosyltransferase 1                                                                                    | 0,83 | 0,0461 |
| 1429547_at   | 6Rik     | RIKEN cDNA 4930578I06 gene                                                                                                           | 0,83 | 0,0436 |
| 1434131_at   | Rufy1    | RUN and FYVE domain containing 1                                                                                                     | 0,83 | 0,0296 |
| 1455861_at   | Epb4.1I5 | erythrocyte protein band 4.1-like 5                                                                                                  | 0,83 | 0,0403 |
| 1448975_s_at | Ren1     | renin 1 structural                                                                                                                   | 0,83 | 0,0145 |
| 1426522_at   | Hadhb    | hydroxyacyl-Coenzyme A dehydrogenase/3-ketoacyl-Coenzyme A thiolase/enoyl-Coenzyme A hydratase (trifunctional protein), beta subunit | 0,83 | 0,0464 |
| 1424878_at   | Lrch4    | leucine-rich repeats and calponin homology (CH) domain containing 4                                                                  | 0,83 | 0,0354 |
| 1417080_a_at | Ecsit    | ECSIT homolog (Drosophila)                                                                                                           | 0,83 | 0,0073 |
| 1421262_at   | Lipg     | lipase, endothelial                                                                                                                  | 0,83 | 0,0142 |
| 1435258_at   | Tmem141  | transmembrane protein 141                                                                                                            | 0,83 | 0,0495 |
| 1417286_at   | Ndufa5   | NADH dehydrogenase (ubiquinone) 1 alpha subcomplex, 5                                                                                | 0,83 | 0,0130 |
| 1422453_at   | Prpf8    | pre-mRNA processing factor 8                                                                                                         | 0,83 | 0,0387 |
| 1459487_at   | NA       | NA                                                                                                                                   | 0,83 | 0,0393 |
| 1454759_at   | Git1     | G protein-coupled receptor kinase-interactor 1                                                                                       | 0,83 | 0,0302 |

|              |          |                                                                               |      |        |
|--------------|----------|-------------------------------------------------------------------------------|------|--------|
| 1451005_at   | Sumo1    | SMT3 suppressor of mif two 3 homolog 1 (yeast)                                | 0,83 | 0,0449 |
| 1424541_at   | Tmem70   | transmembrane protein 70                                                      | 0,83 | 0,0132 |
| 1451402_at   | Ecd      | ecdysoneless homolog (Drosophila)                                             | 0,83 | 0,0266 |
| 1450367_at   | NA       | NA                                                                            | 0,83 | 0,0442 |
| 1418266_at   | Alox12b  | arachidonate 12-lipoxygenase, 12R type                                        | 0,83 | 0,0384 |
| 1428000_at   | Tmem60   | transmembrane protein 60                                                      | 0,83 | 0,0254 |
| 1452285_a_at | Eif3f    | eukaryotic translation initiation factor 3, subunit F                         | 0,83 | 0,0240 |
| 1428158_at   | Akt1s1   | AKT1 substrate 1 (proline-rich)                                               | 0,83 | 0,0240 |
| 1439278_at   | Zbtb20   | zinc finger and BTB domain containing 20                                      | 0,83 | 0,0264 |
| 1444002_at   | Foxl2    | forkhead box L2                                                               | 0,83 | 0,0472 |
| 1437018_at   | Pnma2    | paraneoplastic antigen MA2<br>NADH dehydrogenase (ubiquinone) 1 alpha         | 0,83 | 0,0420 |
| 1428464_at   | Ndufa3   | subcomplex, 3                                                                 | 0,83 | 0,0067 |
| 1421347_at   | Ftmt     | ferritin mitochondrial                                                        | 0,83 | 0,0245 |
| 1431891_at   | Zswim5   | zinc finger, SWIM domain containing 5                                         | 0,83 | 0,0200 |
| 1459260_at   | NA       | NA                                                                            | 0,83 | 0,0371 |
| 1425211_at   | Gatc     | glutamyl-tRNA(Gln) amidotransferase, subunit C<br>homolog (bacterial)         | 0,83 | 0,0391 |
| 1447321_at   | NA       | NA                                                                            | 0,84 | 0,0466 |
| 1449623_at   | Txnrd3   | thioredoxin reductase 3                                                       | 0,84 | 0,0459 |
| 1455283_x_at | Ndufs8   | NADH dehydrogenase (ubiquinone) Fe-S protein 8                                | 0,84 | 0,0144 |
| 1460617_s_at | Rab6b    | RAB6B, member RAS oncogene family                                             | 0,84 | 0,0430 |
| 1421014_a_at | Clybl    | citrate lyase beta like                                                       | 0,84 | 0,0295 |
| 1454438_at   | Rab27a   | RAB27A, member RAS oncogene family                                            | 0,84 | 0,0412 |
| 1460095_at   | 23Rik    | RIKEN cDNA 1110030E23 gene                                                    | 0,84 | 0,0483 |
| 1437629_at   | Arhgef19 | Rho guanine nucleotide exchange factor (GEF) 19                               | 0,84 | 0,0428 |
| 1443638_at   | NA       | NA                                                                            | 0,84 | 0,0395 |
| 1445576_at   | Rsph10b2 | radial spoke head 10 homolog B (Chlamydomonas)                                | 0,84 | 0,0287 |
| 1418127_a_at | Aifm1    | apoptosis-inducing factor, mitochondrion-associated 1                         | 0,84 | 0,0497 |
| 1441439_at   | Ucn3     | urocortin 3                                                                   | 0,84 | 0,0485 |
| 1434656_at   | 05Rik    | RIKEN cDNA B230339M05 gene<br>potassium voltage-gated channel, shaker-related | 0,84 | 0,0493 |
| 1450490_at   | Kcna7    | subfamily, member 7                                                           | 0,84 | 0,0398 |
| 1434344_at   | Gpkow    | G patch domain and KOW motifs                                                 | 0,84 | 0,0493 |
| 1453731_a_at | Tmem77   | transmembrane protein 77                                                      | 0,84 | 0,0406 |
| 1444837_at   | NA       | NA                                                                            | 0,84 | 0,0478 |
| 1449108_at   | Fdx1     | ferredoxin 1                                                                  | 0,84 | 0,0222 |
| 1438206_a_at | Sys1     | SYS1 Golgi-localized integral membrane protein<br>homolog (S. cerevisiae)     | 0,84 | 0,0393 |
| 1451282_at   | Arap3    | ArfGAP with RhoGAP domain, ankyrin repeat and PH<br>domain 3                  | 0,84 | 0,0321 |
| 1440024_at   | NA       | NA                                                                            | 0,84 | 0,0483 |
| 1428495_at   | 15Rik    | RIKEN cDNA 2410003K15 gene                                                    | 0,84 | 0,0298 |
| 1448237_x_at | Ldhb     | lactate dehydrogenase B                                                       | 0,84 | 0,0076 |
| 1422066_x_at | Klrb1b   | killer cell lectin-like receptor subfamily B member 1B                        | 0,84 | 0,0264 |
| 1424888_at   | 37316    | membrane-associated ring finger (C3HC4) 2                                     | 0,84 | 0,0487 |
| 1433773_at   | Rrm2b    | ribonucleotide reductase M2 B (TP53 inducible)                                | 0,84 | 0,0345 |
| 1436419_a_at | 02Rik    | RIKEN cDNA 1700097N02 gene                                                    | 0,84 | 0,0329 |
| 1417720_at   | Polr2j   | polymerase (RNA) II (DNA directed) polypeptide J                              | 0,84 | 0,0102 |
| 1458494_at   | NA       | NA                                                                            | 0,84 | 0,0381 |
| 1428589_at   | Mrpl41   | mitochondrial ribosomal protein L41                                           | 0,84 | 0,0113 |
| 1427422_at   | EG624219 | predicted gene, EG624219                                                      | 0,84 | 0,0477 |
| 1416709_a_at | Ngrn     | neugrin, neurite outgrowth associated                                         | 0,84 | 0,0192 |



|              |                            |                                                                                                        |      |        |
|--------------|----------------------------|--------------------------------------------------------------------------------------------------------|------|--------|
| 1417193_at   | Sod2                       | superoxide dismutase 2, mitochondrial                                                                  | 0,84 | 0,0056 |
| 1457624_at   | Rab8a                      | RAB8A, member RAS oncogene family                                                                      | 0,84 | 0,0239 |
| 1434179_at   | Mll3                       | myeloid/lymphoid or mixed-lineage leukemia 3                                                           | 0,84 | 0,0478 |
| 1454432_at   | 4933423N<br>03Rik          | RIKEN cDNA 4933423N03 gene                                                                             | 0,84 | 0,0449 |
| 1447281_at   | 10004227<br>7              | predicted gene, 100042277                                                                              | 0,84 | 0,0425 |
| 1417098_s_at | Mecr                       | mitochondrial trans-2-enoyl-CoA reductase                                                              | 0,84 | 0,0321 |
| 1426517_at   | Gnaz<br>OTTMUS<br>G0000001 | guanine nucleotide binding protein, alpha z subunit                                                    | 0,84 | 0,0468 |
| 1439280_at   | 0464                       | predicted gene, OTTMUSG00000010464                                                                     | 0,84 | 0,0227 |
| 1415736_at   | Pfdn5<br>6030440G          | prefoldin 5                                                                                            | 0,84 | 0,0255 |
| 1431495_at   | 07Rik                      | RIKEN cDNA 6030440G07 gene                                                                             | 0,84 | 0,0485 |
| 1434387_at   | Itfg3                      | integrin alpha FG-GAP repeat containing 3                                                              | 0,84 | 0,0206 |
| 1418709_at   | Cox7a1                     | cytochrome c oxidase, subunit VIIa 1                                                                   | 0,84 | 0,0085 |
| 1426247_at   | Stk24<br>1810043H          | serine/threonine kinase 24 (STE20 homolog, yeast)                                                      | 0,84 | 0,0477 |
| 1448003_at   | 04Rik                      | RIKEN cDNA 1810043H04 gene                                                                             | 0,84 | 0,0374 |
| 1422897_at   | Slc22a12                   | solute carrier family 22 (organic anion/cation transporter), member 12                                 | 0,84 | 0,0173 |
| 1424554_at   | Ppp1r8                     | protein phosphatase 1, regulatory (inhibitor) subunit 8                                                | 0,84 | 0,0412 |
| 1418988_at   | Pex7<br>4930415O           | peroxisomal biogenesis factor 7                                                                        | 0,84 | 0,0325 |
| 1430211_at   | 20Rik                      | RIKEN cDNA 4930415O20 gene                                                                             | 0,84 | 0,0181 |
| 1416722_at   | Hmg20a                     | high mobility group 20A                                                                                | 0,84 | 0,0256 |
| 1422321_a_at | Sf1                        | splicing factor 1                                                                                      | 0,84 | 0,0243 |
| 1427587_at   | Zfp28                      | zinc finger protein 28                                                                                 | 0,84 | 0,0336 |
| 1423492_at   | Mrpl45                     | mitochondrial ribosomal protein L45                                                                    | 0,84 | 0,0470 |
| 1446119_at   | NA                         | NA                                                                                                     | 0,84 | 0,0405 |
| 1417459_at   | Dcpp1                      | demilune cell and parotid protein 1                                                                    | 0,84 | 0,0435 |
| 1452266_at   | Las1l                      | LAS1-like (S. cerevisiae)                                                                              | 0,84 | 0,0402 |
| 1426019_at   | Plaa                       | phospholipase A2, activating protein                                                                   | 0,84 | 0,0362 |
| 1450452_a_at | Narfl                      | nuclear prelamin A recognition factor-like NADH dehydrogenase (ubiquinone) 1 alpha subcomplex, 6 (B14) | 0,84 | 0,0447 |
| 1448427_at   | Ndufa6                     | subcomplex, 6 (B14)                                                                                    | 0,84 | 0,0111 |
| 1449253_at   | Smc1b                      | structural maintenance of chromosomes 1B phosphatidic acid phosphatase type 2 domain containing 2      | 0,84 | 0,0478 |
| 1428345_at   | Ppapdc2<br>10003899        | 2                                                                                                      | 0,84 | 0,0314 |
| 1459868_x_at | 3                          | predicted gene, 100038993                                                                              | 0,84 | 0,0442 |
| 1437852_x_at | Cpsf3                      | cleavage and polyadenylation specificity factor 3 NADH dehydrogenase (ubiquinone) 1 beta subcomplex, 2 | 0,85 | 0,0468 |
| 1448483_a_at | Ndufb2                     | 2                                                                                                      | 0,85 | 0,0366 |
| 1458569_at   | Ell2<br>1110020P           | elongation factor RNA polymerase II 2                                                                  | 0,85 | 0,0395 |
| 1434341_x_at | 15Rik                      | RIKEN cDNA 1110020P15 gene                                                                             | 0,85 | 0,0369 |
| 1435376_at   | Ddhd2                      | DDHD domain containing 2                                                                               | 0,85 | 0,0344 |
| 1415716_a_at | Rps27                      | ribosomal protein S27                                                                                  | 0,85 | 0,0275 |
| 1449672_s_at | Tufm                       | Tu translation elongation factor, mitochondrial                                                        | 0,85 | 0,0449 |
| 1434579_x_at | Ndufs8                     | NADH dehydrogenase (ubiquinone) Fe-S protein 8                                                         | 0,85 | 0,0161 |
| 1460523_at   | NA                         | NA                                                                                                     | 0,85 | 0,0289 |
| 1449575_a_at | Gstp1                      | glutathione S-transferase, pi 1                                                                        | 0,85 | 0,0186 |
| 1420439_at   | Tsx<br>5033414D            | testis specific X-linked gene                                                                          | 0,85 | 0,0354 |
| 1460361_at   | 02Rik                      | RIKEN cDNA 5033414D02 gene                                                                             | 0,85 | 0,0180 |
| 1449777_at   | Dus4l                      | dihydrouridine synthase 4-like (S. cerevisiae)                                                         | 0,85 | 0,0207 |

|              |          |                                                                                                                                 |      |        |
|--------------|----------|---------------------------------------------------------------------------------------------------------------------------------|------|--------|
| 1428163_at   | Sar1b    | SAR1 gene homolog B ( <i>S. cerevisiae</i> )                                                                                    | 0,85 | 0,0137 |
| 1435729_at   | Robld3   | roadblock domain containing 3                                                                                                   | 0,85 | 0,0479 |
| 1444345_at   | NA       | NA                                                                                                                              | 0,85 | 0,0264 |
| 1437952_at   | AU040096 | expressed sequence AU040096                                                                                                     | 0,85 | 0,0430 |
| 1428473_at   | Ppp3cb   | protein phosphatase 3, catalytic subunit, beta isoform                                                                          | 0,85 | 0,0417 |
| 1426088_at   | NA       | NA                                                                                                                              | 0,85 | 0,0419 |
| 1450123_at   | Ryr2     | ryanodine receptor 2, cardiac                                                                                                   | 0,85 | 0,0315 |
| 1417731_at   | Pqbp1    | polyglutamine binding protein 1                                                                                                 | 0,85 | 0,0279 |
| 1435967_s_at | Hibadh   | 3-hydroxyisobutyrate dehydrogenase                                                                                              | 0,85 | 0,0447 |
| 1423096_at   | Capn7    | calpain 7                                                                                                                       | 0,85 | 0,0340 |
| 1455286_at   | Btbd1    | BTB (POZ) domain containing 1                                                                                                   | 0,85 | 0,0367 |
| 1440946_at   | NA       | NA                                                                                                                              | 0,85 | 0,0320 |
|              | 1700018B |                                                                                                                                 |      |        |
| 1429075_a_at | 08Rik    | RIKEN cDNA 1700018B08 gene                                                                                                      | 0,85 | 0,0468 |
| 1451267_at   | Sharpin  | SHANK-associated RH domain interacting protein                                                                                  | 0,85 | 0,0386 |
| 1457212_at   | NA       | NA                                                                                                                              | 0,85 | 0,0494 |
|              |          | NADH dehydrogenase (ubiquinone) 1 alpha subcomplex, 3                                                                           |      |        |
| 1452790_x_at | Ndufa3   | subcomplex, 3                                                                                                                   | 0,85 | 0,0157 |
| 1425064_at   | Arnt     | aryl hydrocarbon receptor nuclear translocator                                                                                  | 0,85 | 0,0483 |
| 1429425_at   | Rnf139   | ring finger protein 139                                                                                                         | 0,85 | 0,0410 |
| 1418124_at   | Tmem85   | transmembrane protein 85                                                                                                        | 0,85 | 0,0155 |
| 1447714_x_at | NA       | NA                                                                                                                              | 0,85 | 0,0224 |
| 1439334_at   | NA       | NA                                                                                                                              | 0,85 | 0,0459 |
| 1452586_at   | Anapc13  | anaphase promoting complex subunit 13<br>biogenesis of lysosome-related organelles complex-1, subunit 1                         | 0,85 | 0,0228 |
| 1422614_s_at | Bloc1s1  | subunit 1                                                                                                                       | 0,85 | 0,0447 |
| 1450966_at   | Crot     | carnitine O-octanoyltransferase                                                                                                 | 0,85 | 0,0492 |
|              |          | ATP synthase, H+ transporting, mitochondrial F0 complex, subunit c (subunit 9), isoform 2                                       |      |        |
| 1415980_at   | Atp5g2   | complex, subunit c (subunit 9), isoform 2                                                                                       | 0,85 | 0,0242 |
| 1442937_at   | C77190   | expressed sequence C77190                                                                                                       | 0,85 | 0,0443 |
| 1451387_s_at | Cuta     | cutA divalent cation tolerance homolog ( <i>E. coli</i> )<br>ATP synthase, H+ transporting, mitochondrial F1 complex, O subunit | 0,85 | 0,0142 |
| 1416278_a_at | Atp5o    | complex, O subunit                                                                                                              | 0,85 | 0,0130 |
| 1422578_at   | Cs       | citrate synthase                                                                                                                | 0,85 | 0,0445 |
| 1444998_at   | NA       | NA                                                                                                                              | 0,85 | 0,0373 |
| 1429901_at   | Nkain2   | Na+/K+ transporting ATPase interacting 2                                                                                        | 0,85 | 0,0292 |
| 1415754_at   | Polr2f   | polymerase (RNA) II (DNA directed) polypeptide F                                                                                | 0,85 | 0,0482 |
| 1418833_at   | Agxt     | alanine-glyoxylate aminotransferase                                                                                             | 0,85 | 0,0445 |
| 1423737_at   | Ndufs3   | NADH dehydrogenase (ubiquinone) Fe-S protein 3                                                                                  | 0,86 | 0,0213 |
| 1416245_at   | Aurkaip1 | aurora kinase A interacting protein 1                                                                                           | 0,86 | 0,0240 |
| 1456967_at   | Trim66   | tripartite motif-containing 66<br>NADH dehydrogenase (ubiquinone) 1 alpha subcomplex, 13                                        | 0,86 | 0,0369 |
| 1430713_s_at | Ndufa13  | subcomplex, 13                                                                                                                  | 0,86 | 0,0107 |
|              |          | translocase of outer mitochondrial membrane 7 homolog (yeast)                                                                   |      |        |
| 1428214_at   | Tomm7    | (yeast)                                                                                                                         | 0,86 | 0,0376 |
|              |          | N-ethylmaleimide sensitive fusion protein attachment protein alpha                                                              |      |        |
| 1448243_at   | Napa     | protein alpha                                                                                                                   | 0,86 | 0,0330 |
| 1418549_at   | Cga      | glycoprotein hormones, alpha subunit<br>NADH dehydrogenase (ubiquinone) 1 alpha subcomplex, 8                                   | 0,86 | 0,0364 |
| 1423692_at   | Ndufa8   | subcomplex, 8                                                                                                                   | 0,86 | 0,0063 |
| 1422451_at   | Mrps21   | mitochondrial ribosomal protein S21                                                                                             | 0,86 | 0,0361 |
| 1437807_x_at | Ctnna1   | catenin (cadherin associated protein), alpha 1<br>NADH dehydrogenase (ubiquinone) 1 beta subcomplex, 2                          | 0,86 | 0,0391 |
| 1416834_x_at | Ndufb2   | 2                                                                                                                               | 0,86 | 0,0193 |
| 1415984_at   | Acadm    | acyl-Coenzyme A dehydrogenase, medium chain                                                                                     | 0,86 | 0,0412 |
| 1428169_at   | Atg16l1  | autophagy-related 16-like 1 (yeast)                                                                                             | 0,86 | 0,0267 |
| 1435201_at   | Tmem174  | transmembrane protein 174                                                                                                       | 0,86 | 0,0333 |

|              |          |                                                                                      |      |        |
|--------------|----------|--------------------------------------------------------------------------------------|------|--------|
|              | 2310035K |                                                                                      |      |        |
| 1428241_at   | 24Rik    | RIKEN cDNA 2310035K24 gene                                                           | 0,86 | 0,0378 |
| 1417108_at   | Klc4     | kinesin light chain 4                                                                | 0,86 | 0,0438 |
| 1416228_at   | Pin1     | protein (peptidyl-prolyl cis/trans isomerase) NIMA-interacting 1                     | 0,86 | 0,0405 |
| 1426651_at   | Mrpl44   | mitochondrial ribosomal protein L44                                                  | 0,86 | 0,0192 |
| 1450818_a_at | Ndufa7   | NADH dehydrogenase (ubiquinone) 1 alpha subcomplex, 7 (B14.5a)                       | 0,86 | 0,0290 |
| 1416183_a_at | Ldhb     | lactate dehydrogenase B                                                              | 0,86 | 0,0413 |
| 1428553_at   | Glrx5    | glutaredoxin 5 homolog ( <i>S. cerevisiae</i> )                                      | 0,86 | 0,0260 |
| 1422976_x_at | Ndufa7   | NADH dehydrogenase (ubiquinone) 1 alpha subcomplex, 7 (B14.5a)                       | 0,86 | 0,0482 |
| 1451312_at   | Ndufs7   | NADH dehydrogenase (ubiquinone) Fe-S protein 7                                       | 0,86 | 0,0230 |
| 1450055_at   | Vsn1     | visinin-like 1                                                                       | 0,86 | 0,0443 |
| 1451673_at   | Cd8a     | CD8 antigen, alpha chain                                                             | 0,87 | 0,0234 |
| 1415891_at   | Suclg1   | succinate-CoA ligase, GDP-forming, alpha subunit                                     | 0,87 | 0,0281 |
| 1416534_at   | Dpf2     | D4, zinc and double PHD fingers family 2                                             | 0,87 | 0,0303 |
| 1434213_x_at | Ndufs8   | NADH dehydrogenase (ubiquinone) Fe-S protein 8                                       | 0,87 | 0,0483 |
| 1416960_at   | B3gat3   | beta-1,3-glucuronyltransferase 3 (glucuronosyltransferase I)                         | 0,87 | 0,0449 |
| 1449218_at   | Cox8b    | cytochrome c oxidase, subunit VIIIb                                                  | 0,87 | 0,0446 |
|              | 2310038E |                                                                                      |      |        |
| 1432975_at   | 17Rik    | RIKEN cDNA 2310038E17 gene                                                           | 0,87 | 0,0467 |
| 1431665_a_at | Timm8b   | translocase of inner mitochondrial membrane 8 homolog b (yeast)                      | 0,87 | 0,0479 |
| 1428075_at   | Ndufb4   | NADH dehydrogenase (ubiquinone) 1 beta subcomplex 4                                  | 0,87 | 0,0244 |
| 1428316_a_at | Fundc2   | FUN14 domain containing 2                                                            | 0,87 | 0,0368 |
| 1449445_x_at | Mfap1a   | microfibrillar-associated protein 1A                                                 | 0,88 | 0,0491 |
| 1416175_a_at | Vdac3    | voltage-dependent anion channel 3                                                    | 0,88 | 0,0431 |
| 1423604_at   | Ncan     | neurocan                                                                             | 0,88 | 0,0395 |
| 1423857_at   | Mrpl30   | mitochondrial ribosomal protein L30                                                  | 0,88 | 0,0281 |
| 1428076_s_at | Ndufb4   | NADH dehydrogenase (ubiquinone) 1 beta subcomplex 4                                  | 0,88 | 0,0325 |
| 1425220_x_at | AF067061 | cDNA sequence AF067061                                                               | 0,88 | 0,0417 |
| 1454716_x_at | Cox5b    | cytochrome c oxidase, subunit Vb                                                     | 0,88 | 0,0472 |
| 1416567_s_at | Atp5e    | ATP synthase, H <sup>+</sup> transporting, mitochondrial F1 complex, epsilon subunit | 0,88 | 0,0428 |
| 1451311_a_at | Adipor1  | adiponectin receptor 1                                                               | 0,88 | 0,0475 |
| 1455235_x_at | Ldhb     | lactate dehydrogenase B                                                              | 0,88 | 0,0432 |
| 1430474_a_at | Mtch2    | mitochondrial carrier homolog 2 ( <i>C. elegans</i> )                                | 0,88 | 0,0417 |
| 1439017_x_at | Adipor1  | adiponectin receptor 1                                                               | 0,89 | 0,0387 |
| 1423716_s_at | Atp5d    | ATP synthase, H <sup>+</sup> transporting, mitochondrial F1 complex, delta subunit   | 0,89 | 0,0440 |

**Table II****Upregulated in Shunt vs. Sham**

| <b>Affymetrix probe set identification</b> | <b>Gene symbol</b> | <b>Gene name</b>                                                                                            | <b>Fold change</b> | <b>Adjusted P value</b> |
|--------------------------------------------|--------------------|-------------------------------------------------------------------------------------------------------------|--------------------|-------------------------|
| 1427747_a_at                               | Lcn2<br>2610507B   | lipocalin 2                                                                                                 | 7,34               | 0,0298                  |
| 1455905_at                                 | 11Rik              | RIKEN cDNA 2610507B11 gene<br>serine (or cysteine) peptidase inhibitor, clade A,<br>member 3N               | 4,57               | 0,0061                  |
| 1419100_at                                 | Serpina3n          |                                                                                                             | 4,45               | 0,0499                  |
| 1422660_at                                 | Rbm3               | RNA binding motif protein 3                                                                                 | 3,97               | 0,0032                  |
| 1417355_at                                 | Peg3               | paternally expressed 3                                                                                      | 3,90               | 0,0428                  |
| 1416125_at                                 | Fkbp5              | FK506 binding protein 5                                                                                     | 3,27               | 0,0081                  |
| 1436538_at                                 | Ankrd37            | ankyrin repeat domain 37                                                                                    | 3,20               | 0,0299                  |
| 1428942_at                                 | Mt2                | metallothionein 2                                                                                           | 3,15               | 0,0250                  |
| 1455980_a_at                               | Gas2l3             | growth arrest-specific 2 like 3                                                                             | 3,13               | 0,0233                  |
| 1415988_at                                 | Hdlbp              | high density lipoprotein (HDL) binding protein                                                              | 2,76               | 0,0238                  |
| 1460227_at                                 | Timp1              | tissue inhibitor of metalloproteinase 1                                                                     | 2,70               | 0,0172                  |
| 1426808_at                                 | Lgals3             | lectin, galactose binding, soluble 3                                                                        | 2,65               | 0,0062                  |
| 1417496_at                                 | Cp                 | ceruloplasmin                                                                                               | 2,60               | 0,0440                  |
| 1448352_at                                 | Luzp1              | leucine zipper protein 1                                                                                    | 2,58               | 0,0079                  |
| 1422860_at                                 | Nts                | neurotensin                                                                                                 | 2,57               | 0,0237                  |
| 1427161_at                                 | Cenpf              | centromere protein F                                                                                        | 2,52               | 0,0047                  |
| 1446947_at                                 | NA                 | NA                                                                                                          | 2,51               | 0,0110                  |
| 1433992_at                                 | Shroom2            | shroom family member 2                                                                                      | 2,51               | 0,0021                  |
| 1431098_at                                 | Clip1<br>1200016E  | CAP-GLY domain containing linker protein 1                                                                  | 2,49               | 0,0411                  |
| 1435137_s_at                               | 24Rik              | RIKEN cDNA 1200016E24 gene                                                                                  | 2,49               | 0,0499                  |
| 1425060_s_at                               | Clip1              | CAP-GLY domain containing linker protein 1<br>G protein-coupled receptor, family C, group 5, member<br>B    | 2,48               | 0,0448                  |
| 1451411_at                                 | Gprc5b             |                                                                                                             | 2,48               | 0,0019                  |
| 1416121_at                                 | Lox                | lysyl oxidase                                                                                               | 2,47               | 0,0086                  |
| 1427699_a_at                               | Ptpn11             | protein tyrosine phosphatase, non-receptor type 11                                                          | 2,47               | 0,0148                  |
| 1450786_x_at                               | Pdlim5             | PDZ and LIM domain 5                                                                                        | 2,45               | 0,0283                  |
| 1435716_x_at                               | Snrpn              | small nuclear ribonucleoprotein N                                                                           | 2,44               | 0,0348                  |
| 1449615_s_at                               | Hdlbp              | high density lipoprotein (HDL) binding protein                                                              | 2,43               | 0,0411                  |
| 1424542_at                                 | S100a4             | S100 calcium binding protein A4                                                                             | 2,42               | 0,0028                  |
| 1427311_at                                 | Bptf               | bromodomain PHD finger transcription factor                                                                 | 2,38               | 0,0240                  |
| 1448260_at                                 | Uchl1              | ubiquitin carboxy-terminal hydrolase L1<br>ST8 alpha-N-acetyl-neuraminide alpha-2,8-<br>sialyltransferase 6 | 2,37               | 0,0257                  |
| 1456147_at                                 | St8sia6            |                                                                                                             | 2,31               | 0,0047                  |
| 1437581_at                                 | Zfp800             | zinc finger protein 800                                                                                     | 2,30               | 0,0399                  |
| 1423674_at                                 | Usp1               | ubiquitin specific peptidase 1                                                                              | 2,29               | 0,0103                  |
| 1427275_at                                 | Smc4               | structural maintenance of chromosomes 4                                                                     | 2,28               | 0,0333                  |
| 1451064_a_at                               | Psat1              | phosphoserine aminotransferase 1                                                                            | 2,28               | 0,0177                  |
| 1459860_x_at                               | Trim2              | tripartite motif-containing 2                                                                               | 2,26               | 0,0036                  |
| 1453189_at                                 | Ube2i              | ubiquitin-conjugating enzyme E2I                                                                            | 2,25               | 0,0189                  |
| 1419754_at                                 | Myo5a<br>1700025G  | myosin VA                                                                                                   | 2,22               | 0,0082                  |
| 1436431_at                                 | 04Rik              | RIKEN cDNA 1700025G04 gene                                                                                  | 2,21               | 0,0220                  |

|              |          |                                                                    |      |        |
|--------------|----------|--------------------------------------------------------------------|------|--------|
| 1423162_s_at | Spred1   | sprouty protein with EVH-1 domain 1, related sequence              | 2,19 | 0,0203 |
| 1456440_s_at | St8sia6  | ST8 alpha-N-acetyl-neuraminide alpha-2,8-sialyltransferase 6       | 2,17 | 0,0211 |
| 1424325_at   | Esco1    | establishment of cohesion 1 homolog 1 ( <i>S. cerevisiae</i> )     | 2,16 | 0,0086 |
| 1435770_at   | Txndc13  | thioredoxin domain containing 13                                   | 2,14 | 0,0402 |
| 1437244_at   | Gas2l3   | growth arrest-specific 2 like 3                                    | 2,14 | 0,0341 |
| 1430530_s_at | Nmral1   | NmrA-like family domain containing 1                               | 2,13 | 0,0496 |
| 1427276_at   | Smc4     | structural maintenance of chromosomes 4                            | 2,10 | 0,0111 |
| 1449221_a_at | Rrbp1    | ribosome binding protein 1                                         | 2,09 | 0,0247 |
| 1456112_at   | Tpr      | translocated promoter region                                       | 2,08 | 0,0088 |
| 1417623_at   | Slc12a2  | solute carrier family 12, member 2                                 | 2,07 | 0,0336 |
|              | 2610036L |                                                                    |      |        |
| 1429156_at   | 11Rik    | RIKEN cDNA 2610036L11 gene                                         | 2,05 | 0,0255 |
| 1438091_a_at | H2afz    | H2A histone family, member Z                                       | 2,04 | 0,0264 |
| 1426123_a_at | Rrbp1    | ribosome binding protein 1                                         | 2,04 | 0,0196 |
| 1423594_a_at | Ednrb    | endothelin receptor type B                                         | 2,02 | 0,0164 |
| 1437118_at   | Usp7     | ubiquitin specific peptidase 7                                     | 2,01 | 0,0499 |
| 1451458_at   | Tmem2    | transmembrane protein 2                                            | 2,00 | 0,0272 |
| 1451667_at   | Fam20b   | family with sequence similarity 20, member B                       | 1,98 | 0,0029 |
| 1448471_a_at | Ctla2a   | cytotoxic T lymphocyte-associated protein 2 alpha                  | 1,97 | 0,0047 |
| 1443230_at   | NA       | NA                                                                 | 1,94 | 0,0386 |
| 1416077_at   | Adm      | adrenomedullin                                                     | 1,93 | 0,0247 |
| 1416342_at   | Tnc      | tenascin C                                                         | 1,93 | 0,0428 |
| 1448551_a_at | Trim2    | tripartite motif-containing 2                                      | 1,93 | 0,0200 |
| 1428936_at   | Atp2b1   | ATPase, Ca <sup>++</sup> transporting, plasma membrane 1           | 1,92 | 0,0113 |
| 1416544_at   | Ezh2     | enhancer of zeste homolog 2 ( <i>Drosophila</i> )                  | 1,91 | 0,0221 |
| 1417379_at   | Iqgap1   | IQ motif containing GTPase activating protein 1                    | 1,91 | 0,0047 |
| 1448232_x_at | Tuba1c   | tubulin, alpha 1C                                                  | 1,90 | 0,0283 |
| 1439764_s_at | Igf2bp2  | insulin-like growth factor 2 mRNA binding protein 2                | 1,90 | 0,0456 |
| 1453022_at   | Gpihbp1  | GPI-anchored HDL-binding protein 1                                 | 1,90 | 0,0024 |
|              | ENSMUS   |                                                                    |      |        |
|              | G0000006 |                                                                    |      |        |
| 1439463_x_at | 0128     | predicted gene, ENSMUSG00000060128                                 | 1,89 | 0,0051 |
| 1438556_a_at | Tmod3    | tropomodulin 3                                                     | 1,87 | 0,0438 |
| 1427941_at   | Dicer1   | Dicer1, Dcr-1 homolog ( <i>Drosophila</i> )                        | 1,87 | 0,0443 |
|              |          | transient receptor potential cation channel, subfamily M, member 7 |      |        |
| 1416801_at   | Trpm7    |                                                                    | 1,86 | 0,0404 |
| 1457744_at   | Ddx46    | DEAD (Asp-Glu-Ala-Asp) box polypeptide 46                          | 1,85 | 0,0164 |
| 1415999_at   | Hey1     | hairy/enhancer-of-split related with YRPW motif 1                  | 1,84 | 0,0230 |
|              | OTTMUS   |                                                                    |      |        |
|              | G0000000 |                                                                    |      |        |
| 1436530_at   | 0971     | predicted gene, OTTMUSG00000000971                                 | 1,84 | 0,0099 |
| 1454607_s_at | Psat1    | phosphoserine aminotransferase 1                                   | 1,84 | 0,0246 |
| 1422861_s_at | Pdlim5   | PDZ and LIM domain 5                                               | 1,83 | 0,0298 |
| 1450852_s_at | F2r      | coagulation factor II (thrombin) receptor                          | 1,83 | 0,0027 |
|              |          | membrane protein, palmitoylated 7 (MAGUK p55 subfamily member 7)   |      |        |
| 1432216_s_at | Mpp7     |                                                                    | 1,83 | 0,0278 |
| 1436343_at   | Chd4     | chromodomain helicase DNA binding protein 4                        | 1,82 | 0,0312 |
| 1416811_s_at | Ctla2a   | cytotoxic T lymphocyte-associated protein 2 alpha                  | 1,81 | 0,0027 |
| 1417507_at   | Cyb561   | cytochrome b-561                                                   | 1,80 | 0,0019 |
| 1456262_at   | Rbm5     | RNA binding motif protein 5                                        | 1,79 | 0,0346 |
| 1450397_at   | Mtap1b   | microtubule-associated protein 1B                                  | 1,79 | 0,0414 |
| 1426612_at   | Tipin    | timeless interacting protein                                       | 1,79 | 0,0019 |
| 1435890_at   | Ati3     | atlastin GTPase 3                                                  | 1,78 | 0,0111 |
| 1425565_at   | Rest     | RE1-silencing transcription factor                                 | 1,78 | 0,0227 |
| 1447787_x_at | Gjc1     | gap junction protein, gamma 1                                      | 1,76 | 0,0147 |

|              |                            |                                                                                               |      |        |
|--------------|----------------------------|-----------------------------------------------------------------------------------------------|------|--------|
| 1424613_at   | Gprc5b                     | G protein-coupled receptor, family C, group 5, member B                                       | 1,76 | 0,0055 |
| 1437478_s_at | Efhd2                      | EF hand domain containing 2                                                                   | 1,75 | 0,0086 |
| 1450864_at   | Calm3                      | calmodulin 3                                                                                  | 1,74 | 0,0164 |
| 1448650_a_at | Pole                       | polymerase (DNA directed), epsilon                                                            | 1,71 | 0,0371 |
| 1417938_at   | Rad51ap1                   | RAD51 associated protein 1                                                                    | 1,71 | 0,0410 |
| 1428730_at   | Krit1                      | KRIT1, ankyrin repeat containing                                                              | 1,71 | 0,0284 |
| 1436985_at   | Zfp644                     | zinc finger protein 644                                                                       | 1,71 | 0,0198 |
| 1415895_at   | Snrpn                      | small nuclear ribonucleoprotein N                                                             | 1,71 | 0,0357 |
| 1440882_at   | Lrp8                       | low density lipoprotein receptor-related protein 8, apolipoprotein e receptor                 | 1,71 | 0,0349 |
| 1449380_at   | Pacsin1                    | protein kinase C and casein kinase substrate in neurons 1                                     | 1,71 | 0,0048 |
| 1452595_at   | Adamts4                    | a disintegrin-like and metallopeptidase (reprolysin type) with thrombospondin type 1 motif, 4 | 1,70 | 0,0138 |
| 1438476_a_at | Chd4                       | chromodomain helicase DNA binding protein 4                                                   | 1,69 | 0,0190 |
| 1450845_a_at | Bzw1                       | basic leucine zipper and W2 domains 1                                                         | 1,69 | 0,0141 |
| 1444952_a_at | Nucks1                     | nuclear casein kinase and cyclin-dependent kinase substrate 1                                 | 1,69 | 0,0103 |
| 1426259_at   | Pank3                      | pantothenate kinase 3                                                                         | 1,69 | 0,0350 |
| 1441869_x_at | NA                         | NA                                                                                            | 1,69 | 0,0299 |
| 1420985_at   | Ash1l                      | ash1 (absent, small, or homeotic)-like (Drosophila)                                           | 1,69 | 0,0499 |
| 1424176_a_at | Anxa4                      | annexin A4                                                                                    | 1,68 | 0,0337 |
| 1437308_s_at | F2r                        | coagulation factor II (thrombin) receptor                                                     | 1,68 | 0,0013 |
| 1420843_at   | Ptpnf                      | protein tyrosine phosphatase, receptor type, F                                                | 1,68 | 0,0184 |
| 1426024_a_at | Dbn1                       | drebrin 1                                                                                     | 1,68 | 0,0410 |
| 1437158_at   | Nipbl                      | Nipped-B homolog (Drosophila)                                                                 | 1,68 | 0,0413 |
| 1450872_s_at | Lipa                       | lysosomal acid lipase A                                                                       | 1,67 | 0,0361 |
| 1418937_at   | Dio2                       | deiodinase, iodothyronine, type II                                                            | 1,67 | 0,0114 |
| 1438566_at   | St8sia6                    | ST8 alpha-N-acetyl-neuraminide alpha-2,8-sialyltransferase 6                                  | 1,67 | 0,0081 |
| 1437595_at   | E030010A<br>14Rik          | RIKEN cDNA E030010A14 gene                                                                    | 1,66 | 0,0109 |
| 1428820_at   | Mapre1                     | microtubule-associated protein, RP/EB family, member 1                                        | 1,66 | 0,0435 |
| 1449070_x_at | Apcdd1                     | adenomatosis polyposis coli down-regulated 1                                                  | 1,66 | 0,0276 |
| 1454822_x_at | Apcdd1                     | adenomatosis polyposis coli down-regulated 1                                                  | 1,65 | 0,0358 |
| 1431057_a_at | Prss23                     | protease, serine, 23                                                                          | 1,65 | 0,0055 |
| 1428301_at   | ENSMUS<br>G0000006<br>8790 | predicted gene, ENSMUSG00000068790                                                            | 1,64 | 0,0321 |
| 1453572_a_at | Plp2                       | proteolipid protein 2                                                                         | 1,64 | 0,0032 |
| 1423040_at   | Bzw1                       | basic leucine zipper and W2 domains 1                                                         | 1,64 | 0,0303 |
| 1434010_at   | Fam117b                    | family with sequence similarity 117, member B                                                 | 1,63 | 0,0348 |
| 1458464_at   | Hecw2                      | HECT, C2 and WW domain containing E3 ubiquitin protein ligase 2                               | 1,63 | 0,0410 |
| 1418562_at   | Sf3b1                      | splicing factor 3b, subunit 1                                                                 | 1,63 | 0,0098 |
| 1436759_x_at | LOC10004<br>7856           | similar to calponin 3, acidic                                                                 | 1,63 | 0,0399 |
| 1428228_at   | Pgm3                       | phosphoglucomutase 3                                                                          | 1,62 | 0,0452 |
| 1434020_at   | Pdap1                      | PDGFA associated protein 1                                                                    | 1,62 | 0,0349 |
| 1421375_a_at | S100a6                     | S100 calcium binding protein A6 (calcyclin)                                                   | 1,62 | 0,0063 |
| 1455150_at   | Hecw2                      | HECT, C2 and WW domain containing E3 ubiquitin protein ligase 2                               | 1,62 | 0,0128 |
| 1437671_x_at | Prss23<br>2610510E         | protease, serine, 23                                                                          | 1,62 | 0,0127 |
| 1455732_at   | 02Rik                      | RIKEN cDNA 2610510E02 gene                                                                    | 1,61 | 0,0086 |
| 1457058_at   | Adamts2                    | a disintegrin-like and metallopeptidase (reprolysin type)                                     | 1,61 | 0,0251 |

|              |                    |                                                                                                                    |      |        |
|--------------|--------------------|--------------------------------------------------------------------------------------------------------------------|------|--------|
|              |                    | with thrombospondin type 1 motif, 2                                                                                |      |        |
| 1417028_a_at | Trim2              | tripartite motif-containing 2                                                                                      | 1,61 | 0,0391 |
| 1420842_at   | Ptpnf              | protein tyrosine phosphatase, receptor type, F                                                                     | 1,60 | 0,0259 |
| 1460230_at   | Syn2               | synapsin II                                                                                                        | 1,60 | 0,0399 |
| 1421034_a_at | Il4ra              | interleukin 4 receptor, alpha                                                                                      | 1,60 | 0,0081 |
| 1452359_at   | Rel1               | RELT-like 1                                                                                                        | 1,60 | 0,0259 |
| 1418430_at   | Kif5b              | kinesin family member 5B                                                                                           | 1,59 | 0,0477 |
| 1417872_at   | Fhl1               | four and a half LIM domains 1                                                                                      | 1,59 | 0,0390 |
| 1426326_at   | Zfp91              | zinc finger protein 91                                                                                             | 1,59 | 0,0448 |
| 1460243_at   | Sptlc2             | serine palmitoyltransferase, long chain base subunit 2                                                             | 1,59 | 0,0138 |
| 1430820_a_at | Bbx                | bobby sox homolog (Drosophila)                                                                                     | 1,59 | 0,0443 |
| 1435324_x_at | Hmgb1              | high mobility group box 1                                                                                          | 1,58 | 0,0098 |
| 1452722_a_at | Cul5               | cullin 5                                                                                                           | 1,58 | 0,0206 |
| 1429384_at   | Csnk1g3            | casein kinase 1, gamma 3                                                                                           | 1,58 | 0,0355 |
| 1427357_at   | Cda                | cytidine deaminase                                                                                                 | 1,58 | 0,0428 |
| 1419642_at   | Purb               | purine rich element binding protein B                                                                              | 1,57 | 0,0147 |
| 1420249_s_at | Ccl6               | chemokine (C-C motif) ligand 6                                                                                     | 1,57 | 0,0365 |
| 1431339_a_at | Efhd2              | EF hand domain containing 2                                                                                        | 1,57 | 0,0347 |
| 1421821_at   | Ldlr               | low density lipoprotein receptor                                                                                   | 1,57 | 0,0295 |
| 1456102_a_at | Cul5               | cullin 5                                                                                                           | 1,57 | 0,0267 |
| 1418822_a_at | Arf6               | ADP-ribosylation factor 6                                                                                          | 1,57 | 0,0196 |
| 1421101_a_at | Ldb2               | LIM domain binding 2                                                                                               | 1,56 | 0,0265 |
| 1430782_at   | Ncapd3             | non-SMC condensin II complex, subunit D3                                                                           | 1,56 | 0,0215 |
| 1428976_at   | Tmpo               | thymopoietin                                                                                                       | 1,55 | 0,0021 |
| 1455570_x_at | Cnn3               | calponin 3, acidic                                                                                                 | 1,55 | 0,0391 |
| 1456913_at   | NA                 | NA                                                                                                                 | 1,55 | 0,0087 |
| 1458179_at   | NA                 | NA                                                                                                                 | 1,55 | 0,0499 |
| 1433481_at   | Fkbp14<br>6430706D | FK506 binding protein 14                                                                                           | 1,55 | 0,0081 |
| 1451456_at   | 22Rik              | RIKEN cDNA 6430706D22 gene                                                                                         | 1,55 | 0,0443 |
| 1460378_a_at | Tes                | testis derived transcript                                                                                          | 1,54 | 0,0279 |
| 1452445_at   | Slc41a2            | solute carrier family 41, member 2                                                                                 | 1,54 | 0,0108 |
| 1440991_at   | Plekhg1            | pleckstrin homology domain containing, family G (with RhoGef domain) member 1                                      | 1,54 | 0,0164 |
| 1460238_at   | Msln               | mesothelin                                                                                                         | 1,54 | 0,0392 |
| 1422715_s_at | Acp1               | acid phosphatase 1, soluble<br>leukocyte immunoglobulin-like receptor, subfamily B,<br>member 4                    | 1,53 | 0,0499 |
| 1420394_s_at | Lilrb4             |                                                                                                                    | 1,53 | 0,0130 |
| 1437545_at   | Rcor1              | REST corepressor 1                                                                                                 | 1,53 | 0,0150 |
| 1426777_a_at | Wasl               | Wiskott-Aldrich syndrome-like (human)                                                                              | 1,53 | 0,0484 |
| 1423161_s_at | Spred1             | sprouty protein with EVH-1 domain 1, related sequence<br>microtubule-associated protein, RP/EB family, member<br>1 | 1,53 | 0,0047 |
| 1422764_at   | Mapre1             |                                                                                                                    | 1,52 | 0,0260 |
| 1418245_a_at | Rbm9               | RNA binding motif protein 9                                                                                        | 1,52 | 0,0298 |
| 1459791_at   | Dnajc1             | DnaJ (Hsp40) homolog, subfamily C, member 1                                                                        | 1,52 | 0,0202 |
| 1438168_x_at | Ddx39              | DEAD (Asp-Glu-Ala-Asp) box polypeptide 39                                                                          | 1,52 | 0,0129 |
| 1443768_at   | Rhoa               | ras homolog gene family, member A                                                                                  | 1,52 | 0,0341 |
| 1437087_at   | 08Rik              | RIKEN cDNA 2210408K08 gene                                                                                         | 1,52 | 0,0028 |
| 1433623_at   | Zfp367             | zinc finger protein 367                                                                                            | 1,52 | 0,0266 |
| 1443314_at   | Slc12a6            | solute carrier family 12, member 6                                                                                 | 1,51 | 0,0238 |
| 1449094_at   | Gjc1               | gap junction protein, gamma 1                                                                                      | 1,51 | 0,0065 |
| 1455642_a_at | Tspan17            | tetraspanin 17                                                                                                     | 1,51 | 0,0051 |
| 1449461_at   | Rbp7               | retinol binding protein 7, cellular                                                                                | 1,51 | 0,0048 |
| 1435749_at   | Gda                | guanine deaminase                                                                                                  | 1,51 | 0,0361 |
| 1422062_at   | Msr1               | macrophage scavenger receptor 1                                                                                    | 1,50 | 0,0341 |

|              |                    |                                                                                                   |      |        |
|--------------|--------------------|---------------------------------------------------------------------------------------------------|------|--------|
| 1417101_at   | Hspa2<br>583041711 | heat shock protein 2                                                                              | 1,50 | 0,0247 |
| 1430680_a_at | ORik               | RIKEN cDNA 5830417110 gene                                                                        | 1,50 | 0,0432 |
| 1424442_a_at | Pja2<br>10003920   | praja 2, RING-H2 motif containing                                                                 | 1,49 | 0,0367 |
| 1424609_a_at | 4<br>10003920      | predicted gene, 100039204                                                                         | 1,49 | 0,0413 |
| 1424607_a_at | 4                  | predicted gene, 100039204                                                                         | 1,49 | 0,0488 |
| 1436448_a_at | Ptgs1              | prostaglandin-endoperoxide synthase 1                                                             | 1,49 | 0,0319 |
| 1444541_at   | NA                 | NA                                                                                                | 1,49 | 0,0250 |
| 1424912_at   | Slc25a17           | solute carrier family 25 (mitochondrial carrier, peroxisomal membrane protein), member 17         | 1,49 | 0,0161 |
| 1427953_at   | Fanci              | Fanconi anemia, complementation group I                                                           | 1,48 | 0,0303 |
| 1440975_at   | Mxra7              | matrix-remodelling associated 7                                                                   | 1,48 | 0,0206 |
| 1450157_a_at | Hmnr               | hyaluronan mediated motility receptor (RHAMM)                                                     | 1,48 | 0,0168 |
| 1441683_at   | NA                 | NA                                                                                                | 1,48 | 0,0455 |
| 1455814_x_at | Ddx39              | DEAD (Asp-Glu-Ala-Asp) box polypeptide 39                                                         | 1,48 | 0,0256 |
| 1453240_a_at | Gcap14             | granule cell antiserum positive 14                                                                | 1,48 | 0,0166 |
| 1426978_at   | Klhl2              | kelch-like 2, Mayven (Drosophila)                                                                 | 1,48 | 0,0341 |
| 1423228_at   | B4galt6            | UDP-Gal:betaGlcNAc beta 1,4-galactosyltransferase, polypeptide 6                                  | 1,48 | 0,0250 |
| 1456155_x_at | Hmgcl              | 3-hydroxy-3-methylglutaryl-Coenzyme A lyase                                                       | 1,47 | 0,0228 |
| 1419806_at   | Hdlbp              | high density lipoprotein (HDL) binding protein                                                    | 1,47 | 0,0230 |
| 1417259_a_at | Capzb              | capping protein (actin filament) muscle Z-line, beta                                              | 1,47 | 0,0428 |
| 1424708_at   | Tmed10             | transmembrane emp24-like trafficking protein 10 (yeast)                                           | 1,47 | 0,0410 |
| 1434684_at   | Rin3               | Ras and Rab interactor 3                                                                          | 1,47 | 0,0220 |
| 1434101_at   | Nfib               | nuclear factor I/B                                                                                | 1,47 | 0,0468 |
| 1437208_at   | Sep 10             | septin 10                                                                                         | 1,46 | 0,0456 |
| 1448744_at   | Galns              | galactosamine (N-acetyl)-6-sulfate sulfatase                                                      | 1,46 | 0,0231 |
| 1424110_a_at | Nme1               | non-metastatic cells 1, protein (NM23A) expressed in Ras association (RalGDS/AF-6) and pleckstrin | 1,46 | 0,0139 |
| 1434302_at   | Raph1              | homology domains 1                                                                                | 1,46 | 0,0329 |
| 1425556_at   | Crks               | CDC2-related kinase, arginine/serine-rich                                                         | 1,45 | 0,0368 |
| 1418823_at   | Arf6               | ADP-ribosylation factor 6                                                                         | 1,45 | 0,0280 |
| 1451257_at   | Acsl6              | acyl-CoA synthetase long-chain family member 6                                                    | 1,45 | 0,0480 |
| 1429327_at   | Sdccag1            | serologically defined colon cancer antigen 1                                                      | 1,45 | 0,0358 |
| 1416165_at   | Rab31              | RAB31, member RAS oncogene family                                                                 | 1,45 | 0,0341 |
| 1438401_at   | Ubn1               | ubiquitin 1                                                                                       | 1,45 | 0,0222 |
| 1433963_a_at | Fermt3             | fermitin family homolog 3 (Drosophila)                                                            | 1,45 | 0,0255 |
| 1429060_at   | Malat1             | metastasis associated lung adenocarcinoma transcript 1 (non-coding RNA)                           | 1,44 | 0,0398 |
| 1431086_s_at | Pcmt1              | protein-L-isoaspartate (D-aspartate) O-methyltransferase 1                                        | 1,44 | 0,0169 |
| 1422906_at   | Abcg2              | ATP-binding cassette, sub-family G (WHITE), member 2                                              | 1,44 | 0,0444 |
| 1442827_at   | Tlr4               | toll-like receptor 4                                                                              | 1,44 | 0,0499 |
| 1449870_a_at | Atp6v0a2           | ATPase, H+ transporting, lysosomal V0 subunit A2                                                  | 1,44 | 0,0473 |
| 1460330_at   | Anxa3              | annexin A3                                                                                        | 1,44 | 0,0442 |
| 1458886_at   | NA                 | NA                                                                                                | 1,44 | 0,0373 |
| 1440881_at   | Brwd3              | bromodomain and WD repeat domain containing 3                                                     | 1,43 | 0,0289 |
| 1423160_at   | Spred1             | sprouty protein with EVH-1 domain 1, related sequence                                             | 1,43 | 0,0171 |
| 1436984_at   | Abi2               | abl-interactor 2                                                                                  | 1,43 | 0,0180 |
| 1435346_at   | Ccdc82             | coiled-coil domain containing 82                                                                  | 1,43 | 0,0303 |
| 1422555_s_at | Gna13              | guanine nucleotide binding protein, alpha 13                                                      | 1,43 | 0,0284 |
| 1416335_at   | Mif                | macrophage migration inhibitory factor                                                            | 1,43 | 0,0088 |
| 1460671_at   | Gpx1               | glutathione peroxidase 1                                                                          | 1,43 | 0,0059 |
| 1420832_at   | Qsox1              | quiescin Q6 sulfhydryl oxidase 1                                                                  | 1,42 | 0,0028 |



|              |                   |                                                                                                       |      |        |
|--------------|-------------------|-------------------------------------------------------------------------------------------------------|------|--------|
| 1425148_a_at | Snx6              | sorting nexin 6<br>NIMA (never in mitosis gene a)-related expressed                                   | 1,42 | 0,0032 |
| 1423596_at   | Nek6              | kinase 6                                                                                              | 1,42 | 0,0270 |
| 1424065_at   | Edem1             | ER degradation enhancer, mannosidase alpha-like 1                                                     | 1,42 | 0,0168 |
| 1421477_at   | Cplx2             | complexin 2                                                                                           | 1,42 | 0,0086 |
| 1420715_a_at | Pparg             | peroxisome proliferator activated receptor gamma                                                      | 1,42 | 0,0081 |
| 1424940_s_at | BC022687          | cDNA sequence BC022687                                                                                | 1,42 | 0,0249 |
| 1428574_a_at | Chn2              | chimerin (chimaerin) 2                                                                                | 1,42 | 0,0081 |
| 1427299_at   | Rps6ka3           | ribosomal protein S6 kinase polypeptide 3                                                             | 1,41 | 0,0238 |
| 1436738_at   | Pif1              | PIF1 5'-to-3' DNA helicase homolog (S. cerevisiae)                                                    | 1,41 | 0,0298 |
| 1430151_at   | Nisch             | nischarin                                                                                             | 1,41 | 0,0448 |
| 1424398_at   | Dhx36             | DEAH (Asp-Glu-Ala-His) box polypeptide 36                                                             | 1,41 | 0,0200 |
| 1450011_at   | Hsd17b12          | hydroxysteroid (17-beta) dehydrogenase 12                                                             | 1,41 | 0,0221 |
| 1418296_at   | Fxyd5             | FXDY domain-containing ion transport regulator 5                                                      | 1,41 | 0,0125 |
| 1441618_at   | Arhgap29          | Rho GTPase activating protein 29                                                                      | 1,41 | 0,0171 |
| 1428527_at   | Snx7              | sorting nexin 7                                                                                       | 1,41 | 0,0047 |
| 1452268_at   | Fam76b            | family with sequence similarity 76, member B<br>guanine nucleotide binding protein (G protein), gamma | 1,41 | 0,0430 |
| 1421947_at   | Gng12<br>A330021E | 12                                                                                                    | 1,40 | 0,0187 |
| 1455859_at   | 22Rik             | RIKEN cDNA A330021E22 gene                                                                            | 1,40 | 0,0438 |
| 1422878_at   | Syt12             | synaptotagmin XII                                                                                     | 1,40 | 0,0482 |
| 1419301_at   | Fzd4              | frizzled homolog 4 (Drosophila)                                                                       | 1,40 | 0,0499 |
| 1423877_at   | Chaf1b            | chromatin assembly factor 1, subunit B (p60)                                                          | 1,40 | 0,0381 |
| 1438771_at   | Brd1              | bromodomain containing 1<br>TAF9 RNA polymerase II, TATA box binding protein                          | 1,40 | 0,0299 |
| 1422778_at   | Taf9              | (TBP)-associated factor                                                                               | 1,40 | 0,0147 |
| 1450878_at   | Sri               | sorcin                                                                                                | 1,40 | 0,0185 |
| 1436986_at   | Sntb2             | syntrophin, basic 2                                                                                   | 1,40 | 0,0086 |
| 1425460_at   | Mtmr2<br>4631416L | myotubularin related protein 2                                                                        | 1,39 | 0,0413 |
| 1429185_at   | 12Rik             | RIKEN cDNA 4631416L12 gene                                                                            | 1,39 | 0,0255 |
| 1428971_at   | Ccny              | cyclin Y                                                                                              | 1,39 | 0,0196 |
| 1428889_at   | Alkbh3            | alkB, alkylation repair homolog 3 (E. coli)                                                           | 1,39 | 0,0189 |
| 1417124_at   | Dstn              | destrin                                                                                               | 1,39 | 0,0496 |
| 1437937_at   | Ccbp2             | chemokine binding protein 2                                                                           | 1,39 | 0,0366 |
| 1437642_at   | Agfg2<br>C230071H | ArfGAP with FG repeats 2                                                                              | 1,39 | 0,0283 |
| 1456274_at   | 18Rik             | RIKEN cDNA C230071H18 gene                                                                            | 1,39 | 0,0308 |
| 1446272_at   | Pctk2             | PCTAIRE-motif protein kinase 2                                                                        | 1,39 | 0,0443 |
| 1425523_at   | Rbm25             | RNA binding motif protein 25                                                                          | 1,39 | 0,0497 |
| 1418382_at   | Apcdd1<br>Tmem176 | adenomatosis polyposis coli down-regulated 1                                                          | 1,38 | 0,0399 |
| 1425603_at   | a                 | transmembrane protein 176A                                                                            | 1,38 | 0,0065 |
| 1426710_at   | Calm3             | calmodulin 3                                                                                          | 1,38 | 0,0128 |
| 1419640_at   | Purb              | purine rich element binding protein B                                                                 | 1,38 | 0,0428 |
| 1424309_a_at | Mocs2             | molybdenum cofactor synthesis 2                                                                       | 1,38 | 0,0251 |
| 1448129_at   | Arpc5             | actin related protein 2/3 complex, subunit 5                                                          | 1,38 | 0,0352 |
| 1449821_a_at | Memo1             | mediator of cell motility 1                                                                           | 1,37 | 0,0021 |
| 1426985_s_at | Fam76b            | family with sequence similarity 76, member B                                                          | 1,37 | 0,0427 |
| 1439481_at   | Ipo9              | importin 9                                                                                            | 1,37 | 0,0298 |
| 1436063_at   | Loxl1             | lysyl oxidase-like 1                                                                                  | 1,37 | 0,0396 |
| 1426523_a_at | Gnpda2            | glucosamine-6-phosphate deaminase 2                                                                   | 1,37 | 0,0257 |
| 1418097_a_at | Crlf2             | cytokine receptor-like factor 2                                                                       | 1,37 | 0,0114 |
| 1442623_at   | NA                | NA                                                                                                    | 1,37 | 0,0196 |
| 1447602_x_at | Sulf2             | sulfatase 2                                                                                           | 1,37 | 0,0438 |

|              |                     |                                                              |      |        |
|--------------|---------------------|--------------------------------------------------------------|------|--------|
| 1421223_a_at | Anxa4<br>2310047O   | annexin A4                                                   | 1,37 | 0,0177 |
| 1418963_at   | 13Rik               | RIKEN cDNA 2310047O13 gene                                   | 1,36 | 0,0109 |
| 1421814_at   | Msn                 | moesin                                                       | 1,36 | 0,0315 |
| 1434248_at   | Prkch               | protein kinase C, eta                                        | 1,36 | 0,0298 |
| 1443626_at   | NA                  | NA                                                           | 1,36 | 0,0444 |
| 1455649_at   | Ttc9                | tetratricopeptide repeat domain 9                            | 1,36 | 0,0256 |
| 1446904_at   | NA                  | NA                                                           | 1,36 | 0,0415 |
| 1439555_at   | Rlf                 | rearranged L-myc fusion sequence                             | 1,36 | 0,0391 |
| 1417027_at   | Trim2               | tripartite motif-containing 2                                | 1,36 | 0,0365 |
| 1457180_at   | Dip2c               | DIP2 disco-interacting protein 2 homolog C (Drosophila)      | 1,35 | 0,0491 |
| 1423643_at   | Ddx39               | DEAD (Asp-Glu-Ala-Asp) box polypeptide 39                    | 1,35 | 0,0443 |
| 1448339_at   | Tmem30a<br>1110067D | transmembrane protein 30A                                    | 1,35 | 0,0430 |
| 1424318_at   | 22Rik               | RIKEN cDNA 1110067D22 gene                                   | 1,35 | 0,0452 |
| 1448736_a_at | Hprt1               | hypoxanthine guanine phosphoribosyl transferase 1            | 1,35 | 0,0171 |
| 1434378_a_at | NA                  | NA                                                           | 1,35 | 0,0379 |
| 1417571_at   | Mpg                 | N-methylpurine-DNA glycosylase                               | 1,34 | 0,0499 |
| 1426392_a_at | Actr3               | ARP3 actin-related protein 3 homolog (yeast)                 | 1,34 | 0,0486 |
| 1441848_at   | NA                  | NA                                                           | 1,34 | 0,0361 |
| 1416695_at   | Tspo                | translocator protein                                         | 1,34 | 0,0332 |
| 1451122_at   | Idi1                | isopentenyl-diphosphate delta isomerase                      | 1,34 | 0,0270 |
| 1416066_at   | Cd9                 | CD9 antigen                                                  | 1,34 | 0,0306 |
| 1435737_a_at | Nde1                | nuclear distribution gene E homolog 1 (A nidulans)           | 1,34 | 0,0081 |
| 1444642_at   | NA                  | NA                                                           | 1,34 | 0,0416 |
| 1448638_at   | Mtbp                | Mdm2, transformed 3T3 cell double minute p53 binding protein | 1,34 | 0,0383 |
| 1448879_at   | Ube2l3              | ubiquitin-conjugating enzyme E2L 3                           | 1,34 | 0,0452 |
| 1449256_a_at | Rab11a              | RAB11a, member RAS oncogene family                           | 1,33 | 0,0042 |
| 1425950_at   | Slc17a9             | solute carrier family 17, member 9                           | 1,33 | 0,0464 |
| 1427266_at   | Pbrm1               | polybromo 1                                                  | 1,33 | 0,0422 |
| 1424334_at   | Tspan17             | tetraspanin 17                                               | 1,33 | 0,0256 |
| 1449396_at   | Aoc3                | amine oxidase, copper containing 3                           | 1,32 | 0,0452 |
| 1436900_x_at | Leprot              | leptin receptor overlapping transcript                       | 1,32 | 0,0443 |
| 1454743_at   | Nup205              | nucleoporin 205                                              | 1,32 | 0,0422 |
| 1458025_at   | NA                  | NA                                                           | 1,32 | 0,0209 |
| 1427939_s_at | Mycbp               | c-myc binding protein                                        | 1,31 | 0,0144 |
| 1448953_at   | Blm<br>4833420D     | Bloom syndrome homolog (human)                               | 1,31 | 0,0342 |
| 1454353_at   | 23Rik               | RIKEN cDNA 4833420D23 gene                                   | 1,31 | 0,0347 |
| 1426461_at   | Ugp2                | UDP-glucose pyrophosphorylase 2                              | 1,31 | 0,0213 |
| 1460428_at   | Ankrd13a            | ankyrin repeat domain 13a                                    | 1,31 | 0,0391 |
| 1418905_at   | Nubp1               | nucleotide binding protein 1                                 | 1,31 | 0,0294 |
| 1435277_x_at | Nme1                | non-metastatic cells 1, protein (NM23A) expressed in         | 1,31 | 0,0438 |
| 1419737_a_at | Ldha                | lactate dehydrogenase A                                      | 1,31 | 0,0262 |
| 1453298_at   | Ptpn21              | protein tyrosine phosphatase, non-receptor type 21           | 1,31 | 0,0413 |
| 1420376_a_at | H3f3b               | H3 histone, family 3B                                        | 1,30 | 0,0283 |
| 1437635_at   | St3gal6             | ST3 beta-galactoside alpha-2,3-sialyltransferase 6           | 1,30 | 0,0237 |
| 1456727_a_at | Csnk1d              | casein kinase 1, delta                                       | 1,30 | 0,0375 |
| 1435771_at   | Plcb4               | phospholipase C, beta 4                                      | 1,30 | 0,0499 |
| 1415778_at   | Morf4l2             | mortality factor 4 like 2                                    | 1,30 | 0,0184 |
| 1452983_at   | Cep57               | centrosomal protein 57                                       | 1,30 | 0,0255 |
| 1454727_at   | Afap111             | actin filament associated protein 1-like 1                   | 1,30 | 0,0284 |
| 1452649_at   | Rtn4                | reticulon 4                                                  | 1,30 | 0,0100 |
| 1449323_a_at | Rpl3                | ribosomal protein L3                                         | 1,30 | 0,0078 |
| 1430575_a_at | Tpp2                | tripeptidyl peptidase II                                     | 1,30 | 0,0426 |

|              |          |                                                          |      |        |
|--------------|----------|----------------------------------------------------------|------|--------|
| 1457416_at   | NA       | NA                                                       | 1,29 | 0,0147 |
| 1459616_at   | NA       | NA                                                       | 1,29 | 0,0461 |
| 1438665_at   | Smpd3    | sphingomyelin phosphodiesterase 3, neutral               | 1,29 | 0,0430 |
|              | 1810035L |                                                          |      |        |
| 1428554_a_at | 17Rik    | RIKEN cDNA 1810035L17 gene                               | 1,29 | 0,0069 |
| 1423383_a_at | Osbpl9   | oxysterol binding protein-like 9                         | 1,29 | 0,0216 |
| 1425553_s_at | Hip1r    | huntingtin interacting protein 1 related                 | 1,29 | 0,0155 |
| 1445210_at   | NA       | NA                                                       | 1,29 | 0,0465 |
| 1417817_a_at | Wwtr1    | WW domain containing transcription regulator 1           | 1,29 | 0,0199 |
| 1423369_at   | Fmr1     | fragile X mental retardation syndrome 1 homolog          | 1,28 | 0,0478 |
| 1441825_x_at | Ighmbp2  | immunoglobulin mu binding protein 2                      | 1,28 | 0,0381 |
| 1430193_at   | Casc5    | cancer susceptibility candidate 5                        | 1,28 | 0,0391 |
|              | D14Ert44 |                                                          |      |        |
| 1428738_a_at | 9e       | DNA segment, Chr 14, ERATO Doi 449, expressed            | 1,28 | 0,0238 |
| 1424910_at   | Kif12    | kinesin family member 12                                 | 1,28 | 0,0306 |
|              |          | guanine nucleotide binding protein (G protein), gamma 2  |      |        |
| 1418451_at   | Gng2     | 2                                                        | 1,28 | 0,0238 |
| 1455249_at   | NA       | NA                                                       | 1,28 | 0,0321 |
| 1448903_at   | Sep 15   | selenoprotein                                            | 1,28 | 0,0138 |
| 1438629_x_at | Grn      | granulin                                                 | 1,28 | 0,0381 |
| 1439888_at   | NA       | NA                                                       | 1,27 | 0,0312 |
|              | 9030407P |                                                          |      |        |
| 1454056_at   | 20Rik    | RIKEN cDNA 9030407P20 gene                               | 1,27 | 0,0410 |
| 1438137_at   | NA       | NA                                                       | 1,27 | 0,0442 |
| 1441138_at   | Foxn2    | forkhead box N2                                          | 1,26 | 0,0468 |
| 1418703_at   | Rbms1    | RNA binding motif, single stranded interacting protein 1 | 1,26 | 0,0079 |
| 1437867_at   | NA       | NA                                                       | 1,26 | 0,0422 |
|              | 5830485P |                                                          |      |        |
| 1433027_at   | 09Rik    | RIKEN cDNA 5830485P09 gene                               | 1,26 | 0,0428 |
| 1450117_at   | Tcf3     | transcription factor 3                                   | 1,26 | 0,0361 |
| 1437148_at   | Arpc2    | actin related protein 2/3 complex, subunit 2             | 1,25 | 0,0174 |
|              | 2810025M |                                                          |      |        |
| 1428452_at   | 15Rik    | RIKEN cDNA 2810025M15 gene                               | 1,25 | 0,0103 |
| 1446311_at   | Mbc2     | membrane bound C2 domain containing protein              | 1,25 | 0,0302 |
| 1418355_at   | Nucb2    | nucleobindin 2                                           | 1,25 | 0,0440 |
| 1417418_s_at | Cox6a1   | cytochrome c oxidase, subunit VI a, polypeptide 1        | 1,25 | 0,0406 |
| 1460177_at   | Cndp2    | CNDP dipeptidase 2 (metallopeptidase M20 family)         | 1,25 | 0,0478 |
| 1417023_a_at | Fabp4    | fatty acid binding protein 4, adipocyte                  | 1,25 | 0,0200 |
|              | 5730427N |                                                          |      |        |
| 1423132_a_at | 09Rik    | RIKEN cDNA 5730427N09 gene                               | 1,25 | 0,0396 |
| 1446027_at   | NA       | NA                                                       | 1,24 | 0,0410 |
| 1455801_x_at | Tbcd     | tubulin-specific chaperone d                             | 1,24 | 0,0200 |
| 1417291_at   | Tnfrsf1a | tumor necrosis factor receptor superfamily, member 1a    | 1,24 | 0,0137 |
| 1416093_a_at | Mrpl20   | mitochondrial ribosomal protein L20                      | 1,24 | 0,0164 |
| 1426759_at   | Map4k3   | mitogen-activated protein kinase kinase kinase kinase 3  | 1,24 | 0,0229 |
| 1422553_at   | Pten     | phosphatase and tensin homolog                           | 1,24 | 0,0287 |
| 1436335_at   | Plch2    | phospholipase C, eta 2                                   | 1,24 | 0,0306 |
| 1426397_at   | Tgfbr2   | transforming growth factor, beta receptor II             | 1,23 | 0,0456 |
| 1424438_a_at | Leprt    | leptin receptor overlapping transcript                   | 1,23 | 0,0398 |
| 1456567_x_at | Grn      | granulin                                                 | 1,23 | 0,0413 |
| 1416435_at   | Ltbr     | lymphotoxin B receptor                                   | 1,22 | 0,0499 |
| 1448524_s_at | Ssr4     | signal sequence receptor, delta                          | 1,22 | 0,0214 |
| 1417464_at   | Tnnc2    | troponin C2, fast                                        | 1,22 | 0,0379 |
| 1434968_a_at | Actr3    | ARP3 actin-related protein 3 homolog (yeast)             | 1,22 | 0,0385 |
| 1416027_at   | Pdcd6    | programmed cell death 6                                  | 1,22 | 0,0172 |
| 1421663_at   | Dhrs2    | dehydrogenase/reductase member 2                         | 1,22 | 0,0301 |

|              |        |                                                |      |        |
|--------------|--------|------------------------------------------------|------|--------|
| 1416241_at   | Sec13  | SEC13 homolog (S. cerevisiae)                  | 1,21 | 0,0449 |
| 1422507_at   | Cstb   | cystatin B                                     | 1,20 | 0,0440 |
| 1419305_a_at | Fbxo36 | F-box protein 36                               | 1,20 | 0,0493 |
| 1424432_at   | Ubt1   | ubiquitin domain containing 1                  | 1,20 | 0,0484 |
| 1460639_a_at | Atox1  | ATX1 (antioxidant protein 1) homolog 1 (yeast) | 1,19 | 0,0428 |

---

## Downregulated in Shunt vs. Sham

| Affymetrix probe set identification | Gene symbol | Gene name                                                                                             | Fold change | Adjusted P value |
|-------------------------------------|-------------|-------------------------------------------------------------------------------------------------------|-------------|------------------|
| 1452388_at                          | Hspa1a      | heat shock protein 1A                                                                                 | 0,18        | 0,0256           |
| 1427126_at                          | Hspa1b      | heat shock protein 1B                                                                                 | 0,18        | 0,0203           |
| 1427127_x_at                        | Hspa1b      | heat shock protein 1B                                                                                 | 0,22        | 0,0310           |
| 1452318_a_at                        | Hspa1b      | heat shock protein 1B                                                                                 | 0,23        | 0,0394           |
| 1423566_a_at                        | Hsph1       | heat shock 105kDa/110kDa protein 1                                                                    | 0,24        | 0,0365           |
| 1425993_a_at                        | Hsph1       | heat shock 105kDa/110kDa protein 1                                                                    | 0,25        | 0,0284           |
| 1435290_x_at                        | H2-Aa       | histocompatibility 2, class II antigen A, alpha                                                       | 0,26        | 0,0375           |
| 1435370_a_at                        | Ces3        | carboxylesterase 3                                                                                    | 0,26        | 0,0019           |
| 1440096_at                          | Ecm2        | extracellular matrix protein 2, female organ and adipocyte specific                                   | 0,27        | 0,0413           |
| 1418174_at                          | Dbp         | D site albumin promoter binding protein                                                               | 0,28        | 0,0368           |
| 1438211_s_at                        | Dbp         | D site albumin promoter binding protein                                                               | 0,29        | 0,0161           |
| 1435574_at                          | NA          | NA                                                                                                    | 0,29        | 0,0139           |
| 1449081_at                          | Ces3        | carboxylesterase 3                                                                                    | 0,30        | 0,0019           |
| 1418849_x_at                        | Aqp7        | aquaporin 7                                                                                           | 0,30        | 0,0189           |
| 1436550_at                          | Fbxo30      | F-box protein 30                                                                                      | 0,31        | 0,0237           |
| 1458081_at                          | NA          | NA                                                                                                    | 0,31        | 0,0238           |
| 1449015_at                          | Retnla      | resistin like alpha                                                                                   | 0,32        | 0,0081           |
| 1444153_at                          | NA          | NA                                                                                                    | 0,33        | 0,0028           |
| 1426672_at                          | Ano10       | anoctamin 10                                                                                          | 0,33        | 0,0078           |
| 1454850_at                          | Tbc1d10c    | TBC1 domain family, member 10c                                                                        | 0,35        | 0,0365           |
| 1425425_a_at                        | Wif1        | Wnt inhibitory factor 1                                                                               | 0,36        | 0,0428           |
| 1457472_at                          | Gigyf2      | GRB10 interacting GYF protein 2                                                                       | 0,36        | 0,0151           |
| 1425519_a_at                        | Cd74        | CD74 antigen (invariant polypeptide of major histocompatibility complex, class II antigen-associated) | 0,38        | 0,0308           |
| 1439837_at                          | Gigyf2      | GRB10 interacting GYF protein 2                                                                       | 0,38        | 0,0203           |
| 1429639_at                          | Prei4       | preimplantation protein 4                                                                             | 0,38        | 0,0490           |
| 1435371_x_at                        | Ces3        | carboxylesterase 3                                                                                    | 0,39        | 0,0086           |
| 1425477_x_at                        | H2-Ab1      | histocompatibility 2, class II antigen A, beta 1                                                      | 0,40        | 0,0443           |
| 1459835_s_at                        | Dnaja1      | DnaJ (Hsp40) homolog, subfamily A, member 1                                                           | 0,41        | 0,0499           |
| 1418565_at                          | Serbp1      | serpine1 mRNA binding protein 1                                                                       | 0,41        | 0,0337           |
| 1455358_at                          | A2bp1       | ataxin 2 binding protein 1                                                                            | 0,42        | 0,0217           |
| 1450648_s_at                        | Rmcs5       | response to metastatic cancers 5                                                                      | 0,42        | 0,0291           |
| 1445632_at                          | Ogdh        | oxoglutarate dehydrogenase (lipoamide)                                                                | 0,43        | 0,0081           |
| 1425115_at                          | Rbbp6       | retinoblastoma binding protein 6                                                                      | 0,44        | 0,0061           |
| 1460179_at                          | Dnaja1      | DnaJ (Hsp40) homolog, subfamily A, member 1                                                           | 0,45        | 0,0367           |
| 1424952_at                          | Ociad1      | OCIA domain containing 1                                                                              | 0,45        | 0,0047           |
| 1438423_at                          | Ssbp2       | single-stranded DNA binding protein 2                                                                 | 0,45        | 0,0039           |
| 1440443_at                          | E030016H    | RIKEN cDNA E030016H06 gene                                                                            | 0,45        | 0,0499           |
| 1422155_at                          | 06Rik       | RIKEN cDNA E030016H06 gene                                                                            | 0,45        | 0,0499           |
| 1422155_at                          | Hist2h3c2   | histone cluster 2, H3c2                                                                               | 0,45        | 0,0337           |
| 1435605_at                          | Actr3b      | ARP3 actin-related protein 3 homolog B (yeast)                                                        | 0,46        | 0,0334           |
| 1444086_at                          | E030049G    | RIKEN cDNA E030049G20 gene                                                                            | 0,47        | 0,0093           |
| 1444086_at                          | 20Rik       | RIKEN cDNA E030049G20 gene                                                                            | 0,47        | 0,0093           |
| 1435328_at                          | Cyhr1       | cysteine and histidine rich 1                                                                         | 0,47        | 0,0444           |
| 1458218_s_at                        | Pde7a       | phosphodiesterase 7A                                                                                  | 0,47        | 0,0323           |
| 1433532_a_at                        | Mbp         | myelin basic protein                                                                                  | 0,47        | 0,0204           |
| 1454966_at                          | Itga8       | integrin alpha 8                                                                                      | 0,47        | 0,0438           |

|              |           |                                                             |      |        |
|--------------|-----------|-------------------------------------------------------------|------|--------|
| 1449356_at   | Asb5      | ankyrin repeat and SOCs box-containing 5                    | 0,47 | 0,0499 |
| 1434629_at   | Zbtb26    | zinc finger and BTB domain containing 26                    | 0,48 | 0,0139 |
| 1440195_at   | Serbp1    | serpine1 mRNA binding protein 1                             | 0,48 | 0,0172 |
| 1440537_at   | Kcnv2     | potassium channel, subfamily V, member 2                    | 0,48 | 0,0024 |
| 1438385_s_at | Gpt2      | glutamic pyruvate transaminase (alanine aminotransferase) 2 | 0,48 | 0,0373 |
|              | 3110057O1 |                                                             |      |        |
| 1455475_at   | 2Rik      | RIKEN cDNA 3110057O12 gene                                  | 0,48 | 0,0169 |
|              |           | neural precursor cell expressed, developmentally            |      |        |
| 1441305_at   | Nedd4l    | down-regulated gene 4-like                                  | 0,48 | 0,0161 |
| 1425280_at   | Leng1     | leukocyte receptor cluster (LRC) member 1                   | 0,48 | 0,0028 |
| 1416839_at   | Mut       | methylmalonyl-Coenzyme A mutase                             | 0,48 | 0,0491 |
|              | 1190007I0 |                                                             |      |        |
| 1429260_at   | 7Rik      | RIKEN cDNA 1190007I07 gene                                  | 0,49 | 0,0335 |
| 1424716_at   | Retsat    | retinol saturase (all trans retinol 13,14 reductase)        | 0,49 | 0,0273 |
|              | 1810013L2 |                                                             |      |        |
| 1436478_at   | 4Rik      | RIKEN cDNA 1810013L24 gene                                  | 0,49 | 0,0088 |
| 1424078_s_at | Pex6      | peroxisomal biogenesis factor 6                             | 0,49 | 0,0083 |
| 1427410_at   | Dleu2     | deleted in lymphocytic leukemia, 2                          | 0,49 | 0,0214 |
| 1457832_at   | NA        | NA                                                          | 0,49 | 0,0028 |
|              | 6330411E0 |                                                             |      |        |
| 1453783_at   | 7Rik      | RIKEN cDNA 6330411E07 gene                                  | 0,49 | 0,0028 |
| 1439484_at   | Pde7a     | phosphodiesterase 7A                                        | 0,49 | 0,0088 |
| 1443932_at   | Klhdc1    | kelch domain containing 1                                   | 0,50 | 0,0150 |
| 1420796_at   | Ahrr      | aryl-hydrocarbon receptor repressor                         | 0,50 | 0,0234 |
|              |           | potassium voltage-gated channel, shaker-related             |      |        |
| 1455785_at   | Kcna1     | subfamily, member 1                                         | 0,50 | 0,0047 |
| 1429021_at   | Epha4     | Eph receptor A4                                             | 0,50 | 0,0028 |
| 1416147_at   | Hspa4     | heat shock protein 4                                        | 0,50 | 0,0140 |
| 1421278_s_at | Spna1     | spectrin alpha 1                                            | 0,50 | 0,0145 |
| 1443183_at   | Huwe1     | HECT, UBA and WWE domain containing 1                       | 0,50 | 0,0114 |
| 1436590_at   | Ppp1r3b   | protein phosphatase 1, regulatory (inhibitor) subunit 3B    | 0,50 | 0,0113 |
| 1440435_at   | Ky        | kyphoscoliosis peptidase                                    | 0,50 | 0,0065 |
| 1424455_at   | Gprasp1   | G protein-coupled receptor associated sorting protein 1     | 0,51 | 0,0019 |
|              | 3632451O0 |                                                             |      |        |
| 1450770_at   | 6Rik      | RIKEN cDNA 3632451O06 gene                                  | 0,51 | 0,0086 |
| 1441751_at   | AW493563  | expressed sequence AW493563                                 | 0,51 | 0,0477 |
|              |           | glial cell line derived neurotrophic factor family receptor |      |        |
| 1439015_at   | Gfra1     | alpha 1                                                     | 0,51 | 0,0019 |
| 1422540_at   | Fbln1     | fibulin 1                                                   | 0,51 | 0,0196 |
| 1444305_at   | Myh7b     | myosin, heavy chain 7B, cardiac muscle, beta                | 0,51 | 0,0048 |
|              | 9330120H1 |                                                             |      |        |
| 1457671_at   | 1Rik      | RIKEN cDNA 9330120H11 gene                                  | 0,51 | 0,0161 |
| 1456824_at   | Zfp612    | zinc finger protein 612                                     | 0,51 | 0,0103 |
| 1458324_x_at | NA        | NA                                                          | 0,51 | 0,0114 |
| 1429131_at   | Ube2v2    | ubiquitin-conjugating enzyme E2 variant 2                   | 0,52 | 0,0299 |
| 1433935_at   | AU020206  | expressed sequence AU020206                                 | 0,52 | 0,0471 |
| 1419286_s_at | lft81     | intraflagellar transport 81 homolog (Chlamydomonas)         | 0,52 | 0,0021 |
| 1452623_at   | Zfp759    | zinc finger protein 759                                     | 0,52 | 0,0161 |
| 1447693_s_at | Neo1      | neogenin                                                    | 0,52 | 0,0041 |
|              |           | translocase of outer mitochondrial membrane 70              |      |        |
| 1434243_s_at | Tomm70a   | homolog A (yeast)                                           | 0,52 | 0,0361 |
| 1455025_at   | Paqr9     | progesterone and adipoQ receptor family member IX           | 0,52 | 0,0200 |
|              | D630004K  |                                                             |      |        |
| 1440840_at   | 10Rik     | RIKEN cDNA D630004K10 gene                                  | 0,52 | 0,0138 |
|              | 6720401G1 |                                                             |      |        |
| 1438916_x_at | 3Rik      | RIKEN cDNA 6720401G13 gene                                  | 0,53 | 0,0019 |
| 1437987_at   | NA        | NA                                                          | 0,53 | 0,0196 |

|              |                              |                                                                                                                                |      |        |
|--------------|------------------------------|--------------------------------------------------------------------------------------------------------------------------------|------|--------|
| 1457338_at   | NA                           | NA                                                                                                                             | 0,53 | 0,0021 |
| 1439994_at   | NA                           | NA                                                                                                                             | 0,53 | 0,0024 |
| 1460589_at   | Zfp597                       | zinc finger protein 597                                                                                                        | 0,53 | 0,0235 |
| 1428487_s_at | Coq10b                       | coenzyme Q10 homolog B ( <i>S. cerevisiae</i> )<br>inturned planar cell polarity effector homolog<br>( <i>Drosophila</i> )     | 0,53 | 0,0351 |
| 1458595_at   | Intu                         | ( <i>Drosophila</i> )                                                                                                          | 0,53 | 0,0308 |
| 1444956_at   | NA                           | NA                                                                                                                             | 0,53 | 0,0106 |
| 1434647_at   | Egflam                       | EGF-like, fibronectin type III and laminin G domains<br>neural precursor cell expressed, developmentally                       | 0,53 | 0,0079 |
| 1437400_at   | Nedd4l                       | down-regulated gene 4-like                                                                                                     | 0,53 | 0,0140 |
| 1450933_at   | Pde7a                        | phosphodiesterase 7A                                                                                                           | 0,53 | 0,0308 |
| 1448657_a_at | Dnajb2                       | DnaJ (Hsp40) homolog, subfamily B, member 2                                                                                    | 0,54 | 0,0132 |
| 1456041_at   | Snx16                        | sorting nexin 16                                                                                                               | 0,54 | 0,0061 |
| 1449407_at   | lft81                        | intraflagellar transport 81 homolog ( <i>Chlamydomonas</i> )<br>serine (or cysteine) peptidase inhibitor, clade B,<br>member 9 | 0,54 | 0,0048 |
| 1439790_at   | Serpib9                      | member 9                                                                                                                       | 0,54 | 0,0210 |
| 1423841_at   | Bxdc2                        | brix domain containing 2<br>KRR1, small subunit (SSU) processome component,<br>homolog (yeast)                                 | 0,54 | 0,0246 |
| 1444726_at   | Krr1                         | homolog (yeast)                                                                                                                | 0,54 | 0,0177 |
| 1455028_at   | Mapt<br>ENSMUSG<br>000000715 | microtubule-associated protein tau                                                                                             | 0,54 | 0,0308 |
| 1441139_at   | 43                           | predicted gene, ENSMUSG00000071543                                                                                             | 0,55 | 0,0079 |
| 1459325_at   | NA                           | NA                                                                                                                             | 0,55 | 0,0237 |
| 1447500_at   | Cux2                         | cut-like homeobox 2                                                                                                            | 0,55 | 0,0426 |
| 1438217_at   | A2bp1                        | ataxin 2 binding protein 1                                                                                                     | 0,55 | 0,0398 |
| 1435714_x_at | Il17d                        | interleukin 17D<br>ATPase, Ca <sup>++</sup> transporting, cardiac muscle, slow<br>twitch 2                                     | 0,55 | 0,0133 |
| 1427251_at   | Atp2a2                       | twitch 2                                                                                                                       | 0,55 | 0,0027 |
| 1453566_at   | Prr8                         | proline rich 8                                                                                                                 | 0,55 | 0,0065 |
| 1438803_s_at | Snx16                        | sorting nexin 16                                                                                                               | 0,56 | 0,0250 |
| 1424211_at   | Slc25a33                     | solute carrier family 25, member 33                                                                                            | 0,56 | 0,0442 |
| 1428870_at   | Nolc1                        | nucleolar and coiled-body phosphoprotein 1                                                                                     | 0,56 | 0,0108 |
| 1428791_at   | Ube2h                        | ubiquitin-conjugating enzyme E2H                                                                                               | 0,56 | 0,0030 |
| 1449556_at   | H2-T23                       | histocompatibility 2, T region locus 23                                                                                        | 0,56 | 0,0150 |
| 1455690_at   | NA                           | NA                                                                                                                             | 0,56 | 0,0391 |
| 1449001_at   | Ivd                          | isovaleryl coenzyme A dehydrogenase                                                                                            | 0,56 | 0,0042 |
| 1444224_at   | NA                           | NA                                                                                                                             | 0,56 | 0,0448 |
| 1455961_at   | NA                           | NA                                                                                                                             | 0,56 | 0,0081 |
| 1457440_at   | Sstr4                        | somatostatin receptor 4                                                                                                        | 0,56 | 0,0196 |
| 1434826_at   | Rfesd                        | Rieske (Fe-S) domain containing                                                                                                | 0,56 | 0,0284 |
| 1424834_s_at | Itpr2                        | inositol 1,4,5-triphosphate receptor 2<br>TATA box binding protein (Tbp)-associated factor, RNA<br>polymerase I, A             | 0,56 | 0,0097 |
| 1419702_at   | Taf1a                        | polymerase I, A                                                                                                                | 0,56 | 0,0053 |
| 1439821_at   | Lrp2bp                       | Lrp2 binding protein<br>BMP and activin membrane-bound inhibitor, homolog<br>( <i>Xenopus laevis</i> )                         | 0,57 | 0,0112 |
| 1423753_at   | Bambi                        | phosphatidylinositol glycan anchor biosynthesis, class<br>G                                                                    | 0,57 | 0,0177 |
| 1444640_at   | Pigg                         | G                                                                                                                              | 0,57 | 0,0300 |
| 1438413_at   | Senp7                        | SUMO1/sentrin specific peptidase 7<br>TSR2, 20S rRNA accumulation, homolog ( <i>S.</i><br><i>cerevisiae</i> )                  | 0,57 | 0,0050 |
| 1435170_at   | Tsr2                         | <i>cerevisiae</i> )                                                                                                            | 0,57 | 0,0048 |
| 1455459_at   | Prdm15                       | PR domain containing 15<br>cyclin-dependent kinase 7 (homolog of <i>Xenopus</i> MO15)                                          | 0,58 | 0,0056 |
| 1439511_at   | Cdk7                         | cdk-activating kinase)                                                                                                         | 0,58 | 0,0031 |
| 1449398_at   | Rpl3l                        | ribosomal protein L3-like                                                                                                      | 0,58 | 0,0041 |
| 1455337_at   | Fgd4                         | FYVE, RhoGEF and PH domain containing 4                                                                                        | 0,58 | 0,0233 |

|              |           |                                                                                |      |        |
|--------------|-----------|--------------------------------------------------------------------------------|------|--------|
| 1442640_at   | Slfn5     | schlafen 5                                                                     | 0,58 | 0,0407 |
| 1434457_at   | Sp100     | nuclear antigen Sp100                                                          | 0,58 | 0,0172 |
| 1419056_at   | Rtn2      | reticulon 2 (Z-band associated protein)                                        | 0,58 | 0,0019 |
| 1453232_at   | Calr3     | calreticulin 3                                                                 | 0,58 | 0,0028 |
| 1454738_x_at | Pex6      | peroxisomal biogenesis factor 6                                                | 0,58 | 0,0212 |
|              | A330023F2 |                                                                                |      |        |
| 1460033_at   | 4Rik      | RIKEN cDNA A330023F24 gene                                                     | 0,58 | 0,0444 |
| 1440954_at   | NA        | NA                                                                             | 0,58 | 0,0155 |
|              | B330016D  |                                                                                |      |        |
| 1455492_at   | 10Rik     | RIKEN cDNA B330016D10 gene                                                     | 0,58 | 0,0293 |
| 1429108_at   | Msl2      | male-specific lethal 2 homolog (Drosophila)                                    | 0,58 | 0,0266 |
|              | 1700012D0 |                                                                                |      |        |
| 1459813_at   | 1Rik      | RIKEN cDNA 1700012D01 gene                                                     | 0,58 | 0,0435 |
| 1452238_at   | Agfg1     | ArfGAP with FG repeats 1                                                       | 0,58 | 0,0212 |
| 1451212_at   | Ccdc21    | coiled-coil domain containing 21                                               | 0,58 | 0,0326 |
| 1434931_at   | Neo1      | neogenin                                                                       | 0,58 | 0,0086 |
| 1415911_at   | Impact    | imprinted and ancient                                                          | 0,59 | 0,0191 |
| 1423085_at   | Efnb3     | ephrin B3                                                                      | 0,59 | 0,0121 |
| 1449331_a_at | Rapsn     | receptor-associated protein of the synapse                                     | 0,59 | 0,0150 |
| 1457473_at   | Chd1      | chromodomain helicase DNA binding protein 1                                    | 0,59 | 0,0407 |
| 1440027_at   | NA        | NA                                                                             | 0,59 | 0,0067 |
| 1455059_at   | Helz      | helicase with zinc finger domain                                               | 0,59 | 0,0021 |
| 1438930_s_at | Mecp2     | methyl CpG binding protein 2                                                   | 0,59 | 0,0021 |
|              | 0610011F0 |                                                                                |      |        |
| 1431126_a_at | 6Rik      | RIKEN cDNA 0610011F06 gene                                                     | 0,59 | 0,0019 |
| 1434170_at   | Wdr40b    | WD repeat domain 40B                                                           | 0,59 | 0,0094 |
| 1427104_at   | Zfp612    | zinc finger protein 612                                                        | 0,59 | 0,0027 |
| 1445398_at   | NA        | NA                                                                             | 0,59 | 0,0140 |
| 1455014_at   | Hint3     | histidine triad nucleotide binding protein 3                                   | 0,59 | 0,0081 |
| 1436070_at   | Glo1      | glyoxalase 1                                                                   | 0,59 | 0,0131 |
| 1449141_at   | Fblim1    | filamin binding LIM protein 1                                                  | 0,59 | 0,0448 |
| 1435603_at   | Sned1     | sushi, nidogen and EGF-like domains 1                                          | 0,59 | 0,0047 |
| 1449121_at   | Fusip1    | FUS interacting protein (serine-arginine rich) 1                               | 0,59 | 0,0413 |
|              | 2810453I0 |                                                                                |      |        |
| 1418389_at   | 6Rik      | RIKEN cDNA 2810453I06 gene                                                     | 0,59 | 0,0096 |
|              |           | ganglioside-induced differentiation-associated-protein 10                      |      |        |
| 1420342_at   | Gdap10    |                                                                                | 0,59 | 0,0303 |
| 1433509_s_at | Reep1     | receptor accessory protein 1                                                   | 0,59 | 0,0375 |
| 1421277_at   | Spna1     | spectrin alpha 1                                                               | 0,59 | 0,0128 |
| 1451226_at   | Pex6      | peroxisomal biogenesis factor 6                                                | 0,59 | 0,0164 |
| 1436028_at   | Tmem33    | transmembrane protein 33                                                       | 0,60 | 0,0071 |
|              | 2410066E1 |                                                                                |      |        |
| 1434581_at   | 3Rik      | RIKEN cDNA 2410066E13 gene                                                     | 0,60 | 0,0444 |
| 1455182_at   | Kif1b     | kinesin family member 1B                                                       | 0,60 | 0,0314 |
| 1460225_at   | Mrp63     | mitochondrial ribosomal protein 63                                             | 0,60 | 0,0046 |
| 1420535_a_at | Nub1      | negative regulator of ubiquitin-like proteins 1                                | 0,60 | 0,0135 |
| 1436568_at   | Jam2      | junction adhesion molecule 2                                                   | 0,60 | 0,0216 |
| 1442371_at   | Lmbr1     | limb region 1                                                                  | 0,60 | 0,0167 |
|              | C530014P  |                                                                                |      |        |
| 1441577_at   | 21Rik     | RIKEN cDNA C530014P21 gene                                                     | 0,60 | 0,0021 |
|              |           | sterol-C5-desaturase (fungal ERG3, delta-5-desaturase) homolog (S. cerevisiae) |      |        |
| 1434520_at   | Sc5d      |                                                                                | 0,60 | 0,0368 |
| 1435893_at   | Vldlr     | very low density lipoprotein receptor                                          | 0,60 | 0,0024 |
| 1439777_at   | Cugbp2    | CUG triplet repeat, RNA binding protein 2                                      | 0,60 | 0,0264 |
|              | 6430537K1 |                                                                                |      |        |
| 1438878_at   | 6Rik      | RIKEN cDNA 6430537K16 gene                                                     | 0,60 | 0,0024 |
| 1424276_at   | Snx16     | sorting nexin 16                                                               | 0,60 | 0,0055 |



|              |           |                                                                        |      |        |
|--------------|-----------|------------------------------------------------------------------------|------|--------|
| 1438041_at   | Pde7a     | phosphodiesterase 7A                                                   | 0,60 | 0,0041 |
| 1418585_at   | Ccnh      | cyclin H                                                               | 0,60 | 0,0473 |
| 1433806_x_at | Calr      | calreticulin                                                           | 0,60 | 0,0341 |
| 1423365_at   | Cacna1g   | calcium channel, voltage-dependent, T type, alpha 1G subunit           | 0,60 | 0,0168 |
| 1443822_s_at | Cisd1     | CDGSH iron sulfur domain 1                                             | 0,60 | 0,0426 |
| 1430485_at   | Trpc2     | transient receptor potential cation channel, subfamily C, member 2     | 0,60 | 0,0130 |
| 1424485_at   | Angptl3   | angiopoietin-like 3                                                    | 0,60 | 0,0299 |
| 1435911_s_at | Slc2a12   | solute carrier family 2 (facilitated glucose transporter), member 12   | 0,61 | 0,0196 |
| 1440343_at   | Rps6ka5   | ribosomal protein S6 kinase, polypeptide 5                             | 0,61 | 0,0078 |
| 1449480_at   | Sap18     | Sin3-associated polypeptide 18                                         | 0,61 | 0,0389 |
| 1440592_at   | NA        | NA                                                                     | 0,61 | 0,0053 |
| 1445421_at   | NA        | NA                                                                     | 0,61 | 0,0446 |
| 1449576_at   | Eif1ay    | eukaryotic translation initiation factor 1A, Y-linked                  | 0,61 | 0,0399 |
| 1423313_at   | Pde7a     | phosphodiesterase 7A                                                   | 0,61 | 0,0139 |
| 1445270_at   | NA        | NA                                                                     | 0,61 | 0,0041 |
| 1434592_at   | Slc16a10  | solute carrier family 16 (monocarboxylic acid transporters), member 10 | 0,61 | 0,0138 |
| 1417606_a_at | Calr      | calreticulin                                                           | 0,61 | 0,0323 |
| 1446844_at   | Chchd7    | coiled-coil-helix-coiled-coil-helix domain containing 7                | 0,61 | 0,0028 |
| 1417555_at   | Atad1     | ATPase family, AAA domain containing 1                                 | 0,61 | 0,0198 |
| 1427984_at   | Senp6     | SUMO/sentrin specific peptidase 6                                      | 0,61 | 0,0375 |
| 1456625_at   | Aasdhppt  | phosphopantetheinyl transferase                                        | 0,61 | 0,0141 |
| 1442648_at   | Zfp563    | zinc finger protein 563                                                | 0,61 | 0,0118 |
| 1437496_at   | Acad10    | acyl-Coenzyme A dehydrogenase family, member 10                        | 0,61 | 0,0129 |
| 1424726_at   | Tmem150   | transmembrane protein 150                                              | 0,61 | 0,0485 |
| 1415772_at   | Ncl       | nucleolin                                                              | 0,61 | 0,0496 |
| 1418983_at   | Inadl     | InaD-like (Drosophila)                                                 | 0,61 | 0,0047 |
| 1448870_at   | Ltbp1     | latent transforming growth factor beta binding protein 1               | 0,61 | 0,0020 |
| 1457373_at   | NA        | NA                                                                     | 0,61 | 0,0130 |
| 1454967_at   | NA        | NA                                                                     | 0,61 | 0,0028 |
| 1439836_at   | Asb15     | ankyrin repeat and SOCS box-containing 15                              | 0,61 | 0,0021 |
| 1438971_x_at | Ube2h     | ubiquitin-conjugating enzyme E2H                                       | 0,61 | 0,0041 |
| 1418186_at   | Gstt1     | glutathione S-transferase, theta 1                                     | 0,61 | 0,0107 |
| 1438520_at   | Slc25a36  | solute carrier family 25, member 36                                    | 0,61 | 0,0430 |
| 1418219_at   | Il15      | interleukin 15                                                         | 0,61 | 0,0055 |
| 1436636_at   | NA        | NA                                                                     | 0,62 | 0,0171 |
| 1456170_x_at | Calr      | calreticulin                                                           | 0,62 | 0,0375 |
| 1416958_at   | Nr1d2     | nuclear receptor subfamily 1, group D, member 2                        | 0,62 | 0,0399 |
| 1447864_s_at | Pogk      | pogo transposable element with KRAB domain                             | 0,62 | 0,0375 |
| 1457966_at   | NA        | NA                                                                     | 0,62 | 0,0299 |
| 1454855_at   | Magi2     | membrane associated guanylate kinase, WW and PDZ domain containing 2   | 0,62 | 0,0128 |
| 1455506_at   | Slc25a34  | solute carrier family 25, member 34                                    | 0,62 | 0,0173 |
| 1435658_at   | Slc27a1   | solute carrier family 27 (fatty acid transporter), member 1            | 0,62 | 0,0178 |
| 1443848_at   | NA        | NA                                                                     | 0,62 | 0,0428 |
| 1438025_at   | Mtrf1l    | mitochondrial translational release factor 1-like                      | 0,62 | 0,0282 |
| 1430650_at   | Zfp191    | zinc finger protein 191                                                | 0,62 | 0,0129 |
| 1434771_at   | 0610011F0 | RIKEN cDNA 0610011F06 gene                                             | 0,62 | 0,0057 |
| 1448529_at   | Thbd      | thrombomodulin                                                         | 0,62 | 0,0111 |
| 1455558_at   | Ncrna0015 | non-protein coding RNA 153                                             | 0,62 | 0,0048 |

|              |           |                                                                                                                    |      |        |
|--------------|-----------|--------------------------------------------------------------------------------------------------------------------|------|--------|
| 1423112_at   | Ube2d3    | ubiquitin-conjugating enzyme E2D 3 (UBC4/5 homolog, yeast)                                                         | 0,62 | 0,0385 |
| 1451991_at   | Epha7     | Eph receptor A7                                                                                                    | 0,62 | 0,0086 |
| 1455073_at   | Cdadc1    | cytidine and dCMP deaminase domain containing 1                                                                    | 0,62 | 0,0029 |
| 1451542_at   | Ssbp2     | single-stranded DNA binding protein 2                                                                              | 0,62 | 0,0028 |
| 1417823_at   | Gcat      | glycine C-acetyltransferase (2-amino-3-ketobutyrate-coenzyme A ligase)                                             | 0,62 | 0,0053 |
|              | 2010109K1 |                                                                                                                    |      |        |
| 1436839_at   | 1Rik      | RIKEN cDNA 2010109K11 gene                                                                                         | 0,62 | 0,0145 |
| 1453487_at   | Dhdh      | dihydrodiol dehydrogenase (dimeric)                                                                                | 0,63 | 0,0128 |
| 1446421_at   | NA        | NA                                                                                                                 | 0,63 | 0,0276 |
| 1435117_a_at | Dnajc27   | DnaJ (Hsp40) homolog, subfamily C, member 27                                                                       | 0,63 | 0,0152 |
| 1447830_s_at | Rgs2      | regulator of G-protein signaling 2                                                                                 | 0,63 | 0,0136 |
| 1454014_a_at | Mkks      | McKusick-Kaufman syndrome protein                                                                                  | 0,63 | 0,0130 |
| 1429024_at   | Rbm20     | RNA binding motif protein 20                                                                                       | 0,63 | 0,0130 |
| 1447416_at   | Gm239     | gene model 239, (NCBI)                                                                                             | 0,63 | 0,0236 |
|              | 6720401G1 |                                                                                                                    |      |        |
| 1438915_at   | 3Rik      | RIKEN cDNA 6720401G13 gene                                                                                         | 0,63 | 0,0144 |
| 1453135_at   | Fndc5     | fibronectin type III domain containing 5                                                                           | 0,63 | 0,0398 |
| 1449662_at   | Reep1     | receptor accessory protein 1                                                                                       | 0,63 | 0,0087 |
| 1446524_at   | NA        | NA                                                                                                                 | 0,63 | 0,0107 |
| 1424833_at   | Itpr2     | inositol 1,4,5-triphosphate receptor 2                                                                             | 0,63 | 0,0048 |
| 1427620_at   | Cul9      | cullin 9                                                                                                           | 0,63 | 0,0325 |
| 1428882_at   | Wipi2     | WD repeat domain, phosphoinositide interacting 2                                                                   | 0,63 | 0,0384 |
| 1428892_at   | Ppil1     | peptidylprolyl isomerase (cyclophilin)-like 1<br>TAF3 RNA polymerase II, TATA box binding protein                  | 0,63 | 0,0247 |
| 1440187_at   | Taf3      | (TBP)-associated factor                                                                                            | 0,63 | 0,0127 |
| 1455121_at   | Lcor      | ligand dependent nuclear receptor corepressor                                                                      | 0,63 | 0,0160 |
| 1436678_at   | Sgcb      | sarcoglycan, beta (dystrophin-associated glycoprotein)                                                             | 0,63 | 0,0086 |
|              | 2610002M  |                                                                                                                    |      |        |
| 1453078_at   | 06Rik     | RIKEN cDNA 2610002M06 gene                                                                                         | 0,63 | 0,0394 |
| 1435115_at   | Fndc5     | fibronectin type III domain containing 5                                                                           | 0,63 | 0,0212 |
| 1436324_at   | Stard9    | START domain containing 9<br>phosphatidylinositol 3 kinase, regulatory subunit,<br>polypeptide 4, p150             | 0,63 | 0,0499 |
| 1460352_s_at | Pik3r4    |                                                                                                                    | 0,63 | 0,0049 |
|              | 3110005L2 |                                                                                                                    |      |        |
| 1453646_at   | 1Rik      | RIKEN cDNA 3110005L21 gene                                                                                         | 0,63 | 0,0363 |
|              | 1190002N1 |                                                                                                                    |      |        |
| 1433581_at   | 5Rik      | RIKEN cDNA 1190002N15 gene                                                                                         | 0,63 | 0,0257 |
| 1439675_at   | Ppara     | peroxisome proliferator activated receptor alpha<br>calcium channel, voltage-dependent, L type, alpha 1C           | 0,63 | 0,0102 |
| 1421297_a_at | Cacna1c   | subunit                                                                                                            | 0,63 | 0,0312 |
| 1450626_at   | Manba     | mannosidase, beta A, lysosomal                                                                                     | 0,63 | 0,0221 |
| 1457214_at   | NA        | NA                                                                                                                 | 0,63 | 0,0436 |
| 1458295_at   | Tmem79    | transmembrane protein 79                                                                                           | 0,64 | 0,0347 |
| 1433851_at   | Ppp4r2    | protein phosphatase 4, regulatory subunit 2                                                                        | 0,64 | 0,0168 |
| 1423314_s_at | Pde7a     | phosphodiesterase 7A<br>cysteine-rich secretory protein LCCL domain containing<br>2                                | 0,64 | 0,0412 |
| 1434758_at   | Crispld2  |                                                                                                                    | 0,64 | 0,0021 |
| 1436719_at   | Slc35f1   | solute carrier family 35, member F1                                                                                | 0,64 | 0,0108 |
| 1437119_at   | Em1       | endoplasmic reticulum (ER) to nucleus signalling 1<br>LysM, putative peptidoglycan-binding, domain<br>containing 4 | 0,64 | 0,0255 |
| 1434093_at   | Lysmd4    |                                                                                                                    | 0,64 | 0,0136 |
| 1440936_at   | Serac1    | serine active site containing 1<br>transient receptor potential cation channel, subfamily C,<br>member 3           | 0,64 | 0,0041 |
| 1417577_at   | Trpc3     |                                                                                                                    | 0,64 | 0,0174 |
| 1437212_at   | Zfp420    | zinc finger protein 420                                                                                            | 0,64 | 0,0214 |
| 1417094_at   | Acot7     | acyl-CoA thioesterase 7                                                                                            | 0,64 | 0,0255 |

|              |           |                                                         |      |        |
|--------------|-----------|---------------------------------------------------------|------|--------|
| 1455659_at   | Tmcc1     | transmembrane and coiled coil domains 1                 | 0,64 | 0,0047 |
|              | 4930430F0 |                                                         |      |        |
| 1433978_at   | 8Rik      | RIKEN cDNA 4930430F08 gene                              | 0,64 | 0,0128 |
| 1440052_at   | NA        | NA                                                      | 0,64 | 0,0039 |
| 1452295_at   | Pmepa1    | prostate transmembrane protein, androgen induced 1      | 0,64 | 0,0088 |
| 1443779_s_at | Lcor      | ligand dependent nuclear receptor corepressor           | 0,64 | 0,0214 |
| 1419714_at   | Cd274     | CD274 antigen                                           | 0,64 | 0,0418 |
| 1444318_at   | Chchd7    | coiled-coil-helix-coiled-coil-helix domain containing 7 | 0,64 | 0,0238 |
|              |           | glycerophosphodiester phosphodiesterase domain          |      |        |
|              |           | containing 3                                            |      |        |
| 1449526_a_at | Gdpd3     |                                                         | 0,64 | 0,0200 |
| 1429555_at   | Cldnd1    | claudin domain containing 1                             | 0,64 | 0,0255 |
| 1435254_at   | Plxnb1    | plexin B1                                               | 0,65 | 0,0200 |
| 1419292_at   | Htra3     | HtrA serine peptidase 3                                 | 0,65 | 0,0422 |
| 1433761_at   | Pde4dip   | phosphodiesterase 4D interacting protein (myomegalin)   | 0,65 | 0,0105 |
| 1431980_a_at | As3mt     | arsenic (+3 oxidation state) methyltransferase          | 0,65 | 0,0365 |
| 1453424_at   | Fyco1     | FYVE and coiled-coil domain containing 1                | 0,65 | 0,0324 |
| 1455491_at   | Hnmp3     | heterogeneous nuclear ribonucleoprotein H3              | 0,65 | 0,0086 |
| 1428198_at   | Adal      | adenosine deaminase-like                                | 0,65 | 0,0347 |
| 1435851_at   | Lgi1      | leucine-rich repeat LGI family, member 1                | 0,65 | 0,0477 |
| 1428100_at   | Sfrs1     | splicing factor, arginine/serine-rich 1 (ASF/SF2)       | 0,65 | 0,0280 |
| 1436767_at   | Luc7l2    | LUC7-like 2 ( <i>S. cerevisiae</i> )                    | 0,65 | 0,0136 |
| 1425677_a_at | Ank1      | ankyrin 1, erythroid                                    | 0,65 | 0,0476 |
|              |           | transducin-like enhancer of split 2, homolog of         |      |        |
|              |           | <i>Drosophila</i> E(spl)                                |      |        |
| 1436244_a_at | Tle2      |                                                         | 0,65 | 0,0144 |
| 1441128_at   | NA        | NA                                                      | 0,65 | 0,0200 |
| 1427287_s_at | Itpr2     | inositol 1,4,5-triphosphate receptor 2                  | 0,65 | 0,0237 |
| 1421265_a_at | Rbm38     | RNA binding motif protein 38                            | 0,65 | 0,0048 |
|              |           | ATPase, aminophospholipid transporter (APLT), class I,  |      |        |
|              |           | type 8A, member 1                                       |      |        |
| 1454728_s_at | Atp8a1    |                                                         | 0,65 | 0,0428 |
| 1428725_at   | Pias2     | protein inhibitor of activated STAT 2                   | 0,65 | 0,0157 |
| 1417408_at   | F3        | coagulation factor III                                  | 0,65 | 0,0150 |
| 1457721_at   | Ppara     | peroxisome proliferator activated receptor alpha        | 0,65 | 0,0086 |
| 1445484_at   | Cycc      | cytochrome c, somatic                                   | 0,65 | 0,0393 |
| 1424531_a_at | Tcea3     | transcription elongation factor A (SII), 3              | 0,65 | 0,0128 |
| 1452462_a_at | Banp      | BTG3 associated nuclear protein                         | 0,65 | 0,0200 |
| 1427322_at   | Brwd1     | bromodomain and WD repeat domain containing 1           | 0,65 | 0,0324 |
| 1425186_at   | Lmbrd1    | LMBR1 domain containing 1                               | 0,65 | 0,0099 |
|              |           | solute carrier family 25 (mitochondrial carrier,        |      |        |
|              |           | palmitoylcarnitine transporter), member 29              |      |        |
| 1423979_a_at | Slc25a29  |                                                         | 0,65 | 0,0078 |
| 1435801_at   | Fktn      | fukutin                                                 | 0,66 | 0,0028 |
| 1442525_at   | NA        | NA                                                      | 0,66 | 0,0196 |
| 1457571_at   | Zfp68     | zinc finger protein 68                                  | 0,66 | 0,0065 |
| 1458358_at   | Pank2     | pantothenate kinase 2 (Hallervorden-Spatz syndrome)     | 0,66 | 0,0430 |
|              | 2900019E0 |                                                         |      |        |
| 1430348_at   | 1Rik      | RIKEN cDNA 2900019E01 gene                              | 0,66 | 0,0389 |
| 1428255_at   | Luc7l     | Luc7 homolog ( <i>S. cerevisiae</i> )-like              | 0,66 | 0,0086 |
| 1455647_at   | Ar        | androgen receptor                                       | 0,66 | 0,0154 |
|              |           | mitogen-activated protein kinase-activated protein      |      |        |
| 1434815_a_at | Mapkapk3  | kinase 3                                                | 0,66 | 0,0483 |
| 1416772_at   | Cpt2      | carnitine palmitoyltransferase 2                        | 0,66 | 0,0147 |
| 1456930_at   | Camsap1   | calmodulin regulated spectrin-associated protein 1      | 0,66 | 0,0042 |
| 1427089_at   | Ccnt2     | cyclin T2                                               | 0,66 | 0,0144 |
| 1430154_at   | Vps13a    | vacuolar protein sorting 13A (yeast)                    | 0,66 | 0,0171 |
| 1435271_at   | Irf3      | interferon regulatory factor 3                          | 0,66 | 0,0078 |
| 1451735_at   | Arfrp1    | ADP-ribosylation factor related protein 1               | 0,66 | 0,0255 |
| 1425568_a_at | Tmem33    | transmembrane protein 33                                | 0,66 | 0,0493 |

|              |           |                                                                                 |      |        |
|--------------|-----------|---------------------------------------------------------------------------------|------|--------|
| 1460399_at   | Ccdc117   | coiled-coil domain containing 117                                               | 0,66 | 0,0293 |
| 1455625_at   | NA        | NA                                                                              | 0,66 | 0,0299 |
| 1416383_a_at | Pcx       | pyruvate carboxylase                                                            | 0,66 | 0,0173 |
| 1450332_s_at | Fmo5      | flavin containing monooxygenase 5                                               | 0,66 | 0,0248 |
| 1423953_at   | Cdkal1    | CDK5 regulatory subunit associated protein 1-like 1                             | 0,66 | 0,0361 |
| 1454976_at   | Sod2      | superoxide dismutase 2, mitochondrial                                           | 0,67 | 0,0114 |
| 1417846_at   | Ulk2      | Unc-51 like kinase 2 (C. elegans)                                               | 0,67 | 0,0288 |
| 1423750_a_at | Sf1       | splicing factor 1                                                               | 0,67 | 0,0134 |
| 1441198_at   | Zfp39     | zinc finger protein 39                                                          | 0,67 | 0,0252 |
|              | 0610009O2 |                                                                                 |      |        |
| 1452685_at   | ORik      | RIKEN cDNA 0610009O20 gene                                                      | 0,67 | 0,0444 |
|              |           | Tia1 cytotoxic granule-associated RNA binding protein-like 1                    |      |        |
| 1452821_at   | Tial1     | THAP domain containing, apoptosis associated protein 1                          | 0,67 | 0,0134 |
| 1455003_at   | Thap1     | 1                                                                               | 0,67 | 0,0319 |
|              |           | proline-serine-threonine phosphatase-interacting protein 2                      |      |        |
| 1455405_at   | Pstpip2   | 2                                                                               | 0,67 | 0,0476 |
| 1417635_at   | Spa17     | sperm autoantigenic protein 17                                                  | 0,67 | 0,0422 |
|              |           | solute carrier family 1 (glutamate/neutral amino acid transporter), member 4    |      |        |
| 1423549_at   | Slc1a4    | 4                                                                               | 0,67 | 0,0284 |
| 1450627_at   | Ank       | progressive ankylosis                                                           | 0,67 | 0,0438 |
| 1458302_at   | NA        | NA                                                                              | 0,67 | 0,0368 |
| 1428474_at   | Ppp3cb    | protein phosphatase 3, catalytic subunit, beta isoform                          | 0,67 | 0,0237 |
| 1437041_at   | Sfrs18    | splicing factor, arginine/serine-rich 18                                        | 0,67 | 0,0299 |
| 1459048_s_at | Zfp142    | zinc finger protein 142                                                         | 0,67 | 0,0113 |
| 1419171_at   | Fam174a   | family with sequence similarity 174, member A                                   | 0,67 | 0,0125 |
| 1459874_s_at | Mtmr4     | myotubularin related protein 4                                                  | 0,67 | 0,0216 |
| 1435326_at   | Lpgat1    | lysophosphatidylglycerol acyltransferase 1                                      | 0,67 | 0,0147 |
|              |           | resistance to inhibitors of cholinesterase 8 homolog B (C. elegans)             |      |        |
| 1435096_at   | Ric8b     | (C. elegans)                                                                    | 0,67 | 0,0090 |
| 1451361_a_at | Pnpla7    | patatin-like phospholipase domain containing 7                                  | 0,67 | 0,0221 |
| 1436939_at   | Unc45b    | unc-45 homolog B (C. elegans)                                                   | 0,67 | 0,0019 |
| 1436278_at   | NA        | NA                                                                              | 0,67 | 0,0078 |
| 1443833_at   | NA        | NA                                                                              | 0,67 | 0,0128 |
| 1422168_a_at | Bdnf      | brain derived neurotrophic factor                                               | 0,67 | 0,0428 |
|              | B930012P2 |                                                                                 |      |        |
| 1457802_at   | ORik      | RIKEN cDNA B930012P20 gene                                                      | 0,67 | 0,0444 |
|              |           | ubiquitin-conjugating enzyme E2E 3, UBC4/5 homolog (yeast)                      |      |        |
| 1448671_at   | Ube2e3    | (yeast)                                                                         | 0,67 | 0,0341 |
| 1436277_at   | Rnf207    | ring finger protein 207                                                         | 0,67 | 0,0171 |
| 1417788_at   | Sncg      | synuclein, gamma                                                                | 0,67 | 0,0428 |
| 1454621_s_at | Fam73b    | family with sequence similarity 73, member B                                    | 0,67 | 0,0477 |
| 1457532_at   | NA        | NA                                                                              | 0,67 | 0,0237 |
| 1450934_at   | Eif4a2    | eukaryotic translation initiation factor 4A2                                    | 0,68 | 0,0476 |
|              | 1110007M  |                                                                                 |      |        |
| 1435333_at   | 04Rik     | RIKEN cDNA 1110007M04 gene                                                      | 0,68 | 0,0091 |
|              |           | leucine zipper-EF-hand containing transmembrane protein 2                       |      |        |
| 1447987_at   | Letm2     | 2                                                                               | 0,68 | 0,0455 |
|              | D330038O  |                                                                                 |      |        |
| 1455334_at   | 06Rik     | RIKEN cDNA D330038O06 gene                                                      | 0,68 | 0,0225 |
| 1416083_at   | Zfand5    | zinc finger, AN1-type domain 5                                                  | 0,68 | 0,0499 |
| 1437051_at   | Dffb      | DNA fragmentation factor, beta subunit                                          | 0,68 | 0,0109 |
| 1448136_at   | Enpp2     | ectonucleotide pyrophosphatase/phosphodiesterase 2                              | 0,68 | 0,0344 |
| 1416400_at   | Pycl1     | pyrroline-5-carboxylate reductase-like                                          | 0,68 | 0,0361 |
|              |           | sortilin-related receptor, LDLR class A repeats-containing                      |      |        |
| 1453003_at   | Sorl1     | 1                                                                               | 0,68 | 0,0405 |
|              |           | sema domain, transmembrane domain (TM), and cytoplasmic domain, (semaphorin) 6A |      |        |
| 1436458_at   | Sema6a    | 6A                                                                              | 0,68 | 0,0351 |

|              |                   |                                                                                                         |      |        |
|--------------|-------------------|---------------------------------------------------------------------------------------------------------|------|--------|
| 1434073_at   | Gprasp2           | G protein-coupled receptor associated sorting protein 2                                                 | 0,68 | 0,0065 |
| 1438188_x_at | Slc25a29          | solute carrier family 25 (mitochondrial carrier, palmitoylcarnitine transporter), member 29             | 0,68 | 0,0299 |
| 1435594_at   | Atl2              | atlastin GTPase 2                                                                                       | 0,68 | 0,0184 |
| 1444908_at   | Habp4             | hyaluronic acid binding protein 4                                                                       | 0,68 | 0,0065 |
| 1460458_at   | Crispld2          | cysteine-rich secretory protein LCCL domain containing 2                                                | 0,68 | 0,0317 |
| 1451467_s_at | Gtpbp5            | GTP binding protein 5                                                                                   | 0,68 | 0,0410 |
| 1435248_a_at | Btaf1             | BTAF1 RNA polymerase II, B-TFIID transcription factor-associated, (Mot1 homolog, <i>S. cerevisiae</i> ) | 0,68 | 0,0317 |
| 1441460_at   | NA                | NA                                                                                                      | 0,68 | 0,0406 |
| 1448546_at   | Rassf3            | Ras association (RalGDS/AF-6) domain family member 3                                                    | 0,68 | 0,0173 |
| 1434962_x_at | Ccl27a            | chemokine (C-C motif) ligand 27A                                                                        | 0,68 | 0,0468 |
| 1417294_at   | Akr7a5            | aldo-keto reductase family 7, member A5 (aflatoxin aldehyde reductase)                                  | 0,68 | 0,0169 |
| 1460204_at   | Tec               | cytoplasmic tyrosine kinase, Dscr28C related ( <i>Drosophila</i> )                                      | 0,68 | 0,0122 |
| 1453233_s_at | Calr3             | calreticulin 3                                                                                          | 0,68 | 0,0245 |
| 1418150_at   | Mtmr4             | myotubularin related protein 4                                                                          | 0,68 | 0,0188 |
| 1431199_at   | 0610031G0<br>8Rik | RIKEN cDNA 0610031G08 gene                                                                              | 0,68 | 0,0238 |
| 1435299_at   | Cdk7              | cyclin-dependent kinase 7 (homolog of <i>Xenopus</i> MO15 cdk-activating kinase)                        | 0,68 | 0,0081 |
| 1453461_at   | Fxc1              | fractured callus expressed transcript 1                                                                 | 0,68 | 0,0350 |
| 1451169_at   | Nomo1             | nodal modulator 1                                                                                       | 0,68 | 0,0055 |
| 1438296_at   | C430010C<br>01    | hypothetical protein C430010C01                                                                         | 0,68 | 0,0081 |
| 1426861_at   | Aftph             | aftiphilin                                                                                              | 0,68 | 0,0133 |
| 1426782_at   | Gpr125            | G protein-coupled receptor 125                                                                          | 0,68 | 0,0368 |
| 1449443_at   | Decr1             | 2,4-dienoyl CoA reductase 1, mitochondrial                                                              | 0,69 | 0,0389 |
| 1440636_at   | NA                | NA                                                                                                      | 0,69 | 0,0443 |
| 1423063_at   | Dnmt3a            | DNA methyltransferase 3A                                                                                | 0,69 | 0,0168 |
| 1427971_at   | Cdc73             | cell division cycle 73, Paf1/RNA polymerase II complex component, homolog ( <i>S. cerevisiae</i> )      | 0,69 | 0,0284 |
| 1423272_at   | Polg              | polymerase (DNA directed), gamma                                                                        | 0,69 | 0,0332 |
| 1438006_at   | 4933439F1<br>8Rik | RIKEN cDNA 4933439F18 gene                                                                              | 0,69 | 0,0076 |
| 1428656_at   | Rnasen            | ribonuclease III, nuclear                                                                               | 0,69 | 0,0086 |
| 1435230_at   | Ankrd12           | ankyrin repeat domain 12                                                                                | 0,69 | 0,0203 |
| 1460200_s_at | Lztf1l            | leucine zipper transcription factor-like 1                                                              | 0,69 | 0,0428 |
| 1429723_at   | 6330409N0<br>4Rik | RIKEN cDNA 6330409N04 gene                                                                              | 0,69 | 0,0196 |
| 1423980_at   | Slc25a29          | solute carrier family 25 (mitochondrial carrier, palmitoylcarnitine transporter), member 29             | 0,69 | 0,0206 |
| 1435469_at   | Qsox2             | quiescin Q6 sulfhydryl oxidase 2                                                                        | 0,69 | 0,0438 |
| 1428603_at   | LOC10003<br>6521  | hypothetical gene LOC100036521                                                                          | 0,69 | 0,0145 |
| 1415909_at   | Stip1             | stress-induced phosphoprotein 1                                                                         | 0,69 | 0,0275 |
| 1420127_s_at | Ccpg1             | cell cycle progression 1                                                                                | 0,69 | 0,0055 |
| 1455139_at   | AI851716          | expressed sequence AI851716                                                                             | 0,69 | 0,0134 |
| 1439848_at   | Bves              | blood vessel epicardial substance                                                                       | 0,69 | 0,0064 |
| 1445655_at   | NA                | NA                                                                                                      | 0,69 | 0,0303 |
| 1420113_s_at | 2410022L0<br>5Rik | RIKEN cDNA 2410022L05 gene                                                                              | 0,69 | 0,0065 |
| 1447881_x_at | NA                | NA                                                                                                      | 0,69 | 0,0241 |
| 1422452_at   | Bag3              | BCL2-associated athanogene 3                                                                            | 0,69 | 0,0114 |
| 1419278_at   | Usp48             | ubiquitin specific peptidase 48                                                                         | 0,69 | 0,0235 |

|              |           |                                                                                                                         |      |        |
|--------------|-----------|-------------------------------------------------------------------------------------------------------------------------|------|--------|
| 1458161_at   | Kcnq1ot1  | KCNQ1 overlapping transcript 1                                                                                          | 0,69 | 0,0391 |
| 1416182_at   | Apba3     | amyloid beta (A4) precursor protein-binding, family A, member 3                                                         | 0,69 | 0,0132 |
| 1419401_at   | Asb13     | ankyrin repeat and SOCS box-containing 13                                                                               | 0,69 | 0,0418 |
| 1418472_at   | Aspa      | aspartoacylase                                                                                                          | 0,69 | 0,0394 |
| 1450859_s_at | Ube2d3    | ubiquitin-conjugating enzyme E2D 3 (UBC4/5 homolog, yeast)                                                              | 0,69 | 0,0499 |
| 1415894_at   | Enpp2     | ectonucleotide pyrophosphatase/phosphodiesterase 2                                                                      | 0,69 | 0,0086 |
| 1417661_at   | Rdm1      | RAD52 motif 1                                                                                                           | 0,69 | 0,0173 |
| 1427874_at   | Rnf114    | ring finger protein 114                                                                                                 | 0,69 | 0,0478 |
| 1441649_at   | NA        | NA                                                                                                                      | 0,69 | 0,0196 |
| 1424786_s_at | Wdr45     | WD repeat domain 45                                                                                                     | 0,69 | 0,0065 |
| 1424622_at   | Hsf1      | heat shock factor 1                                                                                                     | 0,70 | 0,0456 |
| 1427969_s_at | Zfp654    | zinc finger protein 654                                                                                                 | 0,70 | 0,0041 |
| 1417255_at   | lft140    | intraflagellar transport 140 homolog (Chlamydomonas)                                                                    | 0,70 | 0,0341 |
| 1419261_at   | Acad8     | acyl-Coenzyme A dehydrogenase family, member 8 solute carrier family 24 (sodium/potassium/calcium exchanger), member 3  | 0,70 | 0,0198 |
| 1424308_at   | Slc24a3   | exchanger), member 3                                                                                                    | 0,70 | 0,0469 |
| 1423741_at   | Rbm10     | RNA binding motif protein 10                                                                                            | 0,70 | 0,0241 |
| 1458404_at   | Ndufb8    | NADH dehydrogenase (ubiquinone) 1 beta subcomplex 8                                                                     | 0,70 | 0,0103 |
| 1456875_at   | 1810013L2 | RIKEN cDNA 1810013L24 gene                                                                                              | 0,70 | 0,0352 |
| 1437818_at   | 4Rik      | RIKEN cDNA 9430016H08 gene                                                                                              | 0,70 | 0,0444 |
| 1422579_at   | 8Rik      | RIKEN cDNA 9430016H08 gene                                                                                              | 0,70 | 0,0444 |
| 1435668_at   | Hspe1     | heat shock protein 1 (chaperonin 10)                                                                                    | 0,70 | 0,0311 |
| 1419188_s_at | Fam120b   | family with sequence similarity 120, member B                                                                           | 0,70 | 0,0250 |
| 1451279_at   | Ccl27a    | chemokine (C-C motif) ligand 27A                                                                                        | 0,70 | 0,0284 |
| 1429429_s_at | Erc1      | ELKS/RAB6-interacting/CAST family member 1 protein-L-isoaspartate (D-aspartate) O-methyltransferase domain containing 1 | 0,70 | 0,0048 |
| 1436079_s_at | Pcmdt1    | vesicle-associated membrane protein, associated protein B and C                                                         | 0,70 | 0,0065 |
| 1428804_at   | Vapb      | protein B and C                                                                                                         | 0,70 | 0,0074 |
| 1453372_at   | Mfap3l    | microfibrillar-associated protein 3-like                                                                                | 0,70 | 0,0275 |
| 1439027_at   | Dnajc1    | DnaJ (Hsp40) homolog, subfamily C, member 1                                                                             | 0,70 | 0,0433 |
| 1455376_at   | C330023M  | RIKEN cDNA C330023M02 gene                                                                                              | 0,70 | 0,0113 |
| 1432901_at   | 02Rik     | RIKEN cDNA C330023M02 gene                                                                                              | 0,70 | 0,0113 |
| 1455320_at   | 3Rik      | RIKEN cDNA 1300010F03 gene                                                                                              | 0,70 | 0,0249 |
| 1453485_s_at | 1300010F0 | RIKEN cDNA 1300010F03 gene                                                                                              | 0,70 | 0,0249 |
| 1436143_at   | 3Rik      | RIKEN cDNA 1300010F03 gene                                                                                              | 0,70 | 0,0249 |
| 1440769_at   | Etl4      | enhancer trap locus 4                                                                                                   | 0,70 | 0,0273 |
| 1418743_a_at | NA        | NA                                                                                                                      | 0,70 | 0,0341 |
| 1434999_at   | 1110005A0 | RIKEN cDNA 1110005A03 gene                                                                                              | 0,70 | 0,0138 |
| 1425210_s_at | 3Rik      | RIKEN cDNA 1110005A03 gene                                                                                              | 0,70 | 0,0138 |
| 1452005_at   | Nbas      | neuroblastoma amplified sequence                                                                                        | 0,70 | 0,0283 |
| 1434267_at   | 2010305A1 | RIKEN cDNA 2010305A19 gene                                                                                              | 0,70 | 0,0059 |
| 1428614_at   | 9Rik      | RIKEN cDNA 2010305A19 gene                                                                                              | 0,70 | 0,0059 |
| 1425210_s_at | 9Rik      | RIKEN cDNA 2010305A19 gene                                                                                              | 0,70 | 0,0059 |
| 1449501_a_at | Tesc      | tescalcin                                                                                                               | 0,70 | 0,0443 |
| 1417008_at   | Suv420h1  | suppressor of variegation 4-20 homolog 1 (Drosophila) NIMA (never in mitosis gene a)-related expressed                  | 0,70 | 0,0174 |
| 1438415_s_at | Suv420h1  | suppressor of variegation 4-20 homolog 1 (Drosophila) NIMA (never in mitosis gene a)-related expressed                  | 0,70 | 0,0174 |
| 1428614_at   | Nek1      | kinase 1                                                                                                                | 0,70 | 0,0146 |
| 1425210_s_at | Ldhd      | lactate dehydrogenase D                                                                                                 | 0,70 | 0,0047 |
| 1452005_at   | Zfp84     | zinc finger protein 84                                                                                                  | 0,70 | 0,0171 |
| 1436560_at   | Dlat      | dihydrolipoamide S-acetyltransferase (E2 component of pyruvate dehydrogenase complex)                                   | 0,70 | 0,0298 |
| 1449501_a_at | Kif3a     | kinesin family member 3A                                                                                                | 0,70 | 0,0428 |
| 1417008_at   | Gzmm      | granzyme M (lymphocyte met-ase 1)                                                                                       | 0,70 | 0,0442 |
| 1438415_s_at | Crat      | carnitine acetyltransferase                                                                                             | 0,70 | 0,0049 |
|              | Yipf2     | Yip1 domain family, member 2                                                                                            | 0,70 | 0,0499 |

|              |           |                                                                                                    |      |        |
|--------------|-----------|----------------------------------------------------------------------------------------------------|------|--------|
| 1434161_at   | Lin52     | lin-52 homolog ( <i>C. elegans</i> )                                                               | 0,70 | 0,0279 |
| 1417190_at   | Nampt     | nicotinamide phosphoribosyltransferase                                                             | 0,70 | 0,0341 |
| 1437300_at   | Mef2d     | myocyte enhancer factor 2D                                                                         | 0,70 | 0,0379 |
|              | 2900009J2 |                                                                                                    |      |        |
| 1428978_at   | ORik      | RIKEN cDNA 2900009J20 gene                                                                         | 0,70 | 0,0229 |
| 1422482_at   | Ruvbl2    | RuvB-like protein 2                                                                                | 0,70 | 0,0168 |
| 1450204_a_at | Mynn      | myoneurin                                                                                          | 0,70 | 0,0235 |
| 1456981_at   | Tmc7      | transmembrane channel-like gene family 7                                                           | 0,71 | 0,0426 |
| 1449459_s_at | Asb13     | ankyrin repeat and SOCS box-containing 13                                                          | 0,71 | 0,0203 |
| 1415743_at   | Hdac5     | histone deacetylase 5                                                                              | 0,71 | 0,0367 |
|              |           | solute carrier family 25 (mitochondrial carrier, palmitoylcarnitine transporter), member 29        |      |        |
| 1423981_x_at | Slc25a29  |                                                                                                    | 0,71 | 0,0169 |
| 1436641_at   | AI415730  | expressed sequence AI415730                                                                        | 0,71 | 0,0426 |
|              | 2900008C1 |                                                                                                    |      |        |
| 1439509_at   | ORik      | RIKEN cDNA 2900008C10 gene                                                                         | 0,71 | 0,0055 |
| 1440345_at   | AI450353  | expressed sequence AI450353                                                                        | 0,71 | 0,0361 |
|              |           | ubiquitin-conjugating enzyme E2G 1 (UBC7 homolog, <i>C. elegans</i> )                              |      |        |
| 1455094_s_at | Ube2g1    |                                                                                                    | 0,71 | 0,0078 |
| 1417791_a_at | Zfml      | zinc finger, matrin-like                                                                           | 0,71 | 0,0370 |
| 1458425_at   | NA        | NA                                                                                                 | 0,71 | 0,0081 |
| 1419646_a_at | Mbp       | myelin basic protein                                                                               | 0,71 | 0,0461 |
| 1460676_at   | Josd1     | Josephin domain containing 1                                                                       | 0,71 | 0,0293 |
| 1424480_s_at | Akt2      | thymoma viral proto-oncogene 2                                                                     | 0,71 | 0,0102 |
| 1427469_at   | Helz      | helicase with zinc finger domain                                                                   | 0,71 | 0,0186 |
| 1433737_at   | Uhmk1     | U2AF homology motif (UHM) kinase 1                                                                 | 0,71 | 0,0368 |
| 1445492_at   | NA        | NA                                                                                                 | 0,71 | 0,0287 |
| 1439895_at   | AU021025  | expressed sequence AU021025                                                                        | 0,71 | 0,0103 |
| 1435066_at   | Pitpnc1   | phosphatidylinositol transfer protein, cytoplasmic 1                                               | 0,71 | 0,0184 |
| 1423074_at   | Lman2     | lectin, mannose-binding 2                                                                          | 0,71 | 0,0422 |
|              |           | cysteine-rich secretory protein LCCL domain containing 2                                           |      |        |
| 1437056_x_at | Crispld2  |                                                                                                    | 0,71 | 0,0290 |
| 1456753_at   | NA        | NA                                                                                                 | 0,71 | 0,0153 |
| 1459665_s_at | Mrvi1     | MRV integration site 1                                                                             | 0,71 | 0,0164 |
| 1426840_at   | Ythdf3    | YTH domain family 3                                                                                | 0,71 | 0,0129 |
| 1434307_at   | Tmem64    | transmembrane protein 64                                                                           | 0,71 | 0,0341 |
|              |           | cell division cycle 73, Paf1/RNA polymerase II complex component, homolog ( <i>S. cerevisiae</i> ) |      |        |
| 1439103_at   | Cdc73     |                                                                                                    | 0,71 | 0,0339 |
| 1460082_at   | Ing3      | inhibitor of growth family, member 3                                                               | 0,71 | 0,0103 |
| 1419477_at   | Clec2d    | C-type lectin domain family 2, member d                                                            | 0,71 | 0,0283 |
|              |           | nardilysin, N-arginine dibasic convertase, NRD                                                     |      |        |
| 1424391_at   | Nrd1      | convertase 1                                                                                       | 0,71 | 0,0048 |
| 1441551_at   | Mypn      | myopalladin                                                                                        | 0,71 | 0,0209 |
| 1417857_at   | Mmaa      | methylmalonic aciduria (cobalamin deficiency) type A                                               | 0,71 | 0,0339 |
| 1447547_at   | Ltbp1     | latent transforming growth factor beta binding protein 1                                           | 0,71 | 0,0078 |
| 1426351_at   | Hspd1     | heat shock protein 1 (chaperonin)                                                                  | 0,71 | 0,0230 |
| 1433901_at   | Caprin1   | cell cycle associated protein 1                                                                    | 0,71 | 0,0449 |
| 1436072_at   | Zfp826    | zinc finger protein 826                                                                            | 0,71 | 0,0177 |
|              |           | solute carrier family 7 (cationic amino acid transporter, y <sup>+</sup> system), member 2         |      |        |
| 1436555_at   | Slc7a2    |                                                                                                    | 0,71 | 0,0475 |
|              | 2010005J0 |                                                                                                    |      |        |
| 1453350_at   | 8Rik      | RIKEN cDNA 2010005J08 gene                                                                         | 0,72 | 0,0325 |
| 1440856_at   | Mapk8     | mitogen-activated protein kinase 8                                                                 | 0,72 | 0,0062 |
| 1419824_a_at | Aasdh     | aminoadipate-semialdehyde dehydrogenase                                                            | 0,72 | 0,0341 |
|              |           | protein phosphatase 2 (formerly 2A), regulatory subunit B (PR 52), alpha isoform                   |      |        |
| 1429715_at   | Ppp2r2a   |                                                                                                    | 0,72 | 0,0142 |
| 1434781_at   | Dnajc16   | DnaJ (Hsp40) homolog, subfamily C, member 16                                                       | 0,72 | 0,0368 |
| 1432916_at   | 573040710 | RIKEN cDNA 5730407107 gene                                                                         | 0,72 | 0,0382 |

|              |           |                                                                                                |      |        |
|--------------|-----------|------------------------------------------------------------------------------------------------|------|--------|
|              | 7Rik      |                                                                                                |      |        |
| 1454891_at   | Cds2      | CDP-diacylglycerol synthase (phosphatidate cytidyltransferase) 2                               | 0,72 | 0,0428 |
| 1437364_at   | Coq3      | coenzyme Q3 homolog, methyltransferase (yeast)                                                 | 0,72 | 0,0357 |
|              | 2310003H0 |                                                                                                |      |        |
| 1455850_at   | 1Rik      | RIKEN cDNA 2310003H01 gene                                                                     | 0,72 | 0,0491 |
| 1449075_at   | Exdl2     | exonuclease 3"-5" domain-like 2                                                                | 0,72 | 0,0484 |
| 1454796_at   | Ficd      | FIC domain containing                                                                          | 0,72 | 0,0340 |
| 1424420_at   | Ccpg1     | cell cycle progression 1                                                                       | 0,72 | 0,0093 |
| 1434511_at   | Phkb      | phosphorylase kinase beta                                                                      | 0,72 | 0,0422 |
|              | 0610012G0 |                                                                                                |      |        |
| 1417003_at   | 3Rik      | RIKEN cDNA 0610012G03 gene                                                                     | 0,72 | 0,0375 |
| 1428696_at   | Rftn1     | raftlin lipid raft linker 1                                                                    | 0,72 | 0,0341 |
|              | 6030458C1 |                                                                                                |      |        |
| 1433860_at   | 1Rik      | RIKEN cDNA 6030458C11 gene                                                                     | 0,72 | 0,0180 |
| 1451729_at   | Bmpr1a    | bone morphogenetic protein receptor, type 1A                                                   | 0,72 | 0,0153 |
| 1425037_at   | Fgd4      | FYVE, RhoGEF and PH domain containing 4 nucleolar complex associated 2 homolog (S. cerevisiae) | 0,72 | 0,0291 |
| 1424323_at   | Noc2l     |                                                                                                | 0,72 | 0,0212 |
| 1419455_at   | Il10rb    | interleukin 10 receptor, beta                                                                  | 0,72 | 0,0379 |
| 1434150_a_at | Mettl7a1  | methyltransferase like 7A1                                                                     | 0,72 | 0,0499 |
| 1435700_at   | Tln2      | talin 2                                                                                        | 0,72 | 0,0238 |
| 1418308_at   | Hus1      | Hus1 homolog (S. pombe)                                                                        | 0,72 | 0,0255 |
| 1459765_s_at | Sf1       | splicing factor 1                                                                              | 0,72 | 0,0230 |
| 1429396_at   | Atg16l2   | autophagy related 16 like 2 (S. cerevisiae)                                                    | 0,72 | 0,0376 |
| 1434051_s_at | Hspa12a   | heat shock protein 12A                                                                         | 0,72 | 0,0499 |
| 1415689_s_at | Zkscan3   | zinc finger with KRAB and SCAN domains 3                                                       | 0,72 | 0,0499 |
| 1457811_at   | NA        | NA                                                                                             | 0,72 | 0,0203 |
| 1455597_at   | Map3k2    | mitogen-activated protein kinase kinase kinase 2                                               | 0,72 | 0,0059 |
| 1452687_at   | Dus2l     | dihydrouridine synthase 2-like (SMM1, S. cerevisiae)                                           | 0,72 | 0,0047 |
| 1415812_at   | Gsn       | gelsolin                                                                                       | 0,72 | 0,0159 |
| 1418706_at   | Slc38a3   | solute carrier family 38, member 3                                                             | 0,72 | 0,0293 |
| 1425508_s_at | Arfrp1    | ADP-ribosylation factor related protein 1                                                      | 0,72 | 0,0340 |
| 1426584_a_at | Sord      | sorbitol dehydrogenase                                                                         | 0,72 | 0,0164 |
| 1443992_at   | Nipbl     | Nipped-B homolog (Drosophila)                                                                  | 0,72 | 0,0227 |
| 1416775_at   | Atp5sl    | ATP5S-like                                                                                     | 0,72 | 0,0237 |
|              |           | DIP2 disco-interacting protein 2 homolog C (Drosophila)                                        |      |        |
| 1429064_at   | Dip2c     |                                                                                                | 0,72 | 0,0028 |
| 1422895_at   | Vamp4     | vesicle-associated membrane protein 4                                                          | 0,73 | 0,0341 |
| 1423068_at   | lft172    | intraflagellar transport 172 homolog (Chlamydomonas)                                           | 0,73 | 0,0111 |
| 1423351_at   | Mrpl1     | mitochondrial ribosomal protein L1                                                             | 0,73 | 0,0448 |
| 1442348_at   | NA        | NA                                                                                             | 0,73 | 0,0230 |
| 1416275_at   | Slc26a6   | solute carrier family 26, member 6                                                             | 0,73 | 0,0418 |
| 1451422_at   | Myo18a    | myosin XVIIIa                                                                                  | 0,73 | 0,0484 |
|              | D3Ertd300 |                                                                                                |      |        |
| 1435905_at   | e         | DNA segment, Chr 3, ERATO Doi 300, expressed                                                   | 0,73 | 0,0041 |
| 1438533_at   | Myo9b     | myosin IXb                                                                                     | 0,73 | 0,0298 |
|              | 1110021J0 |                                                                                                |      |        |
| 1444550_at   | 2Rik      | RIKEN cDNA 1110021J02 gene                                                                     | 0,73 | 0,0088 |
| 1440384_at   | Tmcc1     | transmembrane and coiled coil domains 1 MYST histone acetyltransferase (monocytic leukemia)    | 0,73 | 0,0065 |
| 1436315_at   | Myst3     | 3                                                                                              | 0,73 | 0,0203 |
|              | 2410025L1 |                                                                                                |      |        |
| 1428403_at   | 0Rik      | RIKEN cDNA 2410025L10 gene                                                                     | 0,73 | 0,0083 |
| 1451523_a_at | Mif4gd    | MIF4G domain containing                                                                        | 0,73 | 0,0132 |
| 1452047_at   | Cacybp    | calcyclin binding protein                                                                      | 0,73 | 0,0416 |
| 1440003_at   | NA        | NA                                                                                             | 0,73 | 0,0384 |



|               |           |                                                                                                        |      |        |
|---------------|-----------|--------------------------------------------------------------------------------------------------------|------|--------|
| 1455412_at    | Sfmbt1    | Scm-like with four mbt domains 1                                                                       | 0,73 | 0,0299 |
| 1455656_at    | Btla      | B and T lymphocyte associated                                                                          | 0,73 | 0,0426 |
| 1415684_at    | Atg5      | autophagy-related 5 (yeast)                                                                            | 0,73 | 0,0392 |
| 1452942_at    | Tmem65    | transmembrane protein 65                                                                               | 0,73 | 0,0170 |
|               | 1700020C1 |                                                                                                        |      |        |
| 1424223_at    | 1Rik      | RIKEN cDNA 1700020C11 gene                                                                             | 0,73 | 0,0157 |
| 1416752_at    | Ldb3      | LIM domain binding 3                                                                                   | 0,73 | 0,0214 |
| 1433942_at    | Myo6      | myosin VI                                                                                              | 0,73 | 0,0174 |
| 1429819_at    | Nmnat1    | nicotinamide nucleotide adenyltransferase 1<br>Smith-Magenis syndrome chromosome region,               | 0,73 | 0,0113 |
| 1429017_at    | Smcr8     | candidate 8 homolog (human)                                                                            | 0,73 | 0,0109 |
| 1418694_at    | Kcmf1     | potassium channel modulatory factor 1                                                                  | 0,73 | 0,0456 |
| 1437382_at    | Acvr2a    | activin receptor IIA                                                                                   | 0,73 | 0,0168 |
|               | 6330403M  |                                                                                                        |      |        |
| 1455538_at    | 23Rik     | RIKEN cDNA 6330403M23 gene                                                                             | 0,73 | 0,0499 |
| 1449333_at    | Sf3a1     | splicing factor 3a, subunit 1                                                                          | 0,73 | 0,0171 |
|               | 2010003O0 |                                                                                                        |      |        |
| 1429115_at    | 2Rik      | RIKEN cDNA 2010003O02 gene                                                                             | 0,73 | 0,0173 |
| 1454988_s_at  | Rab22a    | RAB22A, member RAS oncogene family                                                                     | 0,73 | 0,0206 |
| 1420641_a_at  | Sqrdl     | sulfide quinone reductase-like (yeast)                                                                 | 0,73 | 0,0157 |
| AFFX-         |           |                                                                                                        |      |        |
| PyruCarbMur/L |           |                                                                                                        |      |        |
| 09192_3_at    | Pcx       | pyruvate carboxylase<br>heat shock protein 90 alpha (cytosolic), class B                               | 0,73 | 0,0196 |
| 1416364_at    | Hsp90ab1  | member 1                                                                                               | 0,73 | 0,0086 |
| 1451573_a_at  | Stx4a     | syntaxin 4A (placental)                                                                                | 0,73 | 0,0222 |
| 1426353_at    | Stat6     | signal transducer and activator of transcription 6                                                     | 0,73 | 0,0480 |
|               | 1110005A0 |                                                                                                        |      |        |
| 1451448_a_at  | 3Rik      | RIKEN cDNA 1110005A03 gene<br>nucleus accumbens associated 2, BEN and BTB (POZ)                        | 0,73 | 0,0103 |
| 1417152_at    | Nacc2     | domain containing                                                                                      | 0,73 | 0,0155 |
| 1428651_at    | Klhl24    | kelch-like 24 (Drosophila)                                                                             | 0,73 | 0,0316 |
| 1421867_at    | Nr3c1     | nuclear receptor subfamily 3, group C, member 1<br>ubiquitin-conjugating enzyme E2B, RAD6 homology (S. | 0,73 | 0,0436 |
| 1423106_at    | Ube2b     | cerevisiae)                                                                                            | 0,73 | 0,0360 |
| 1427406_at    | Trip11    | thyroid hormone receptor interactor 11                                                                 | 0,74 | 0,0273 |
| 1448717_at    | Gcdh      | glutaryl-Coenzyme A dehydrogenase                                                                      | 0,74 | 0,0238 |
|               | 5430439M  |                                                                                                        |      |        |
| 1453036_at    | 09Rik     | RIKEN cDNA 5430439M09 gene                                                                             | 0,74 | 0,0113 |
| 1450058_at    | Asph      | aspartate-beta-hydroxylase                                                                             | 0,74 | 0,0146 |
| 1449019_at    | Akap1     | A kinase (PRKA) anchor protein 1                                                                       | 0,74 | 0,0021 |
| 1417568_at    | Ncald     | neurocalcin delta                                                                                      | 0,74 | 0,0344 |
| 1428755_at    | Creb1     | cAMP responsive element binding protein 1                                                              | 0,74 | 0,0375 |
| 1427091_at    | Znfx1     | zinc finger, NFX1-type containing 1                                                                    | 0,74 | 0,0235 |
|               | 6820431F2 |                                                                                                        |      |        |
| 1457673_at    | 0Rik      | RIKEN cDNA 6820431F20 gene                                                                             | 0,74 | 0,0361 |
| 1418578_at    | Dgka      | diacylglycerol kinase, alpha                                                                           | 0,74 | 0,0232 |
| 1420776_a_at  | Auh       | AU RNA binding protein/enoyl-coenzyme A hydratase                                                      | 0,74 | 0,0047 |
| 1435074_at    | Tmem106b  | transmembrane protein 106B                                                                             | 0,74 | 0,0109 |
| 1455817_x_at  | Zxdb      | zinc finger, X-linked, duplicated B                                                                    | 0,74 | 0,0203 |
| 1457059_at    | Zfp438    | zinc finger protein 438<br>potassium voltage-gated channel, shaker-related                             | 0,74 | 0,0426 |
| 1437230_at    | Kcna1     | subfamily, member 1<br>aldo-keto reductase family 7, member A5 (aflatoxin                              | 0,74 | 0,0443 |
| 1438315_x_at  | Akr7a5    | aldehyde reductase)                                                                                    | 0,74 | 0,0200 |
| 1417505_s_at  | Il11ra1   | interleukin 11 receptor, alpha chain 1                                                                 | 0,74 | 0,0041 |
| 1448835_at    | E2f6      | E2F transcription factor 6                                                                             | 0,74 | 0,0196 |
| 1452110_at    | Mtrr      | 5-methyltetrahydrofolate-homocysteine                                                                  | 0,74 | 0,0391 |

|              |                     | methyltransferase reductase                                                                                                     |      |        |
|--------------|---------------------|---------------------------------------------------------------------------------------------------------------------------------|------|--------|
| 1451801_at   | Trdn                | triadin                                                                                                                         | 0,74 | 0,0325 |
| 1460687_at   | Setd8               | SET domain containing (lysine methyltransferase) 8                                                                              | 0,74 | 0,0341 |
| 1446528_at   | Scyl2               | SCY1-like 2 (S. cerevisiae)                                                                                                     | 0,74 | 0,0438 |
| 1434168_at   | Peo1                | progressive external ophthalmoplegia 1 (human)                                                                                  | 0,74 | 0,0048 |
| 1447961_s_at | Mrpl38              | mitochondrial ribosomal protein L38                                                                                             | 0,74 | 0,0350 |
| 1452727_at   | R3hdm2              | R3H domain containing 2                                                                                                         | 0,74 | 0,0486 |
| 1451274_at   | Ogdh                | oxoglutarate dehydrogenase (lipoamide)                                                                                          | 0,74 | 0,0102 |
| 1417516_at   | Ddit3               | DNA-damage inducible transcript 3                                                                                               | 0,74 | 0,0348 |
| 1435797_at   | D5Wsu178<br>e       | DNA segment, Chr 5, Wayne State University 178,<br>expressed                                                                    | 0,74 | 0,0303 |
| 1417375_at   | Tuba4a              | tubulin, alpha 4A                                                                                                               | 0,74 | 0,0361 |
| 1417305_at   | Speg<br>A930005H    | SPEG complex locus                                                                                                              | 0,74 | 0,0153 |
| 1457709_a_at | 10Rik               | RIKEN cDNA A930005H10 gene                                                                                                      | 0,74 | 0,0416 |
| 1448733_at   | Bmi1                | Bmi1 polycomb ring finger oncogene                                                                                              | 0,74 | 0,0131 |
| 1460631_at   | Ogt<br>B230206F2    | O-linked N-acetylglucosamine (GlcNAc) transferase<br>(UDP-N-acetylglucosamine:polypeptide-N-<br>acetylglucosaminyl transferase) | 0,74 | 0,0150 |
| 1438838_at   | 2Rik                | RIKEN cDNA B230206F22 gene                                                                                                      | 0,74 | 0,0303 |
| 1435489_at   | NA                  | NA                                                                                                                              | 0,74 | 0,0299 |
| 1416170_at   | Trap1               | TNF receptor-associated protein 1                                                                                               | 0,74 | 0,0341 |
| 1425372_at   | Dnajc19             | DnaJ (Hsp40) homolog, subfamily C, member 19                                                                                    | 0,74 | 0,0288 |
| 1448645_at   | Msl3                | male-specific lethal 3 homolog (Drosophila)                                                                                     | 0,74 | 0,0203 |
| 1451539_at   | Baiap2l1            | BAI1-associated protein 2-like 1                                                                                                | 0,74 | 0,0227 |
| 1418529_at   | Osgp                | O-sialoglycoprotein endopeptidase                                                                                               | 0,74 | 0,0079 |
| 1439278_at   | Zbtb20<br>D14Ert43  | zinc finger and BTB domain containing 20                                                                                        | 0,75 | 0,0055 |
| 1426780_at   | 6e                  | DNA segment, Chr 14, ERATO Doi 436, expressed                                                                                   | 0,75 | 0,0303 |
| 1416859_at   | Fkbp3               | FK506 binding protein 3                                                                                                         | 0,75 | 0,0410 |
| 1435004_at   | Pank4               | pantothenate kinase 4                                                                                                           | 0,75 | 0,0274 |
| 1427052_at   | Acacb               | acetyl-Coenzyme A carboxylase beta                                                                                              | 0,75 | 0,0217 |
| 1452331_s_at | Qser1               | glutamine and serine rich 1                                                                                                     | 0,75 | 0,0369 |
| 1438022_at   | Rab11fip3           | RAB11 family interacting protein 3 (class II)                                                                                   | 0,75 | 0,0164 |
| 1415920_at   | Cstf2t              | cleavage stimulation factor, 3' pre-RNA subunit 2, tau                                                                          | 0,75 | 0,0147 |
| 1434266_at   | AI847670            | expressed sequence AI847670                                                                                                     | 0,75 | 0,0499 |
| 1438409_at   | Cep63               | centrosomal protein 63                                                                                                          | 0,75 | 0,0059 |
| 1415986_at   | Clcn4-2             | chloride channel 4-2                                                                                                            | 0,75 | 0,0053 |
| 1435251_at   | Snx13               | sorting nexin 13                                                                                                                | 0,75 | 0,0303 |
| 1430421_a_at | Tmem205             | transmembrane protein 205                                                                                                       | 0,75 | 0,0300 |
| 1451745_a_at | Znhit1              | zinc finger, HIT domain containing 1                                                                                            | 0,75 | 0,0264 |
| 1441481_at   | Mfap3l              | microfibrillar-associated protein 3-like                                                                                        | 0,75 | 0,0351 |
| 1419122_at   | Mettl1              | methyltransferase like 1                                                                                                        | 0,75 | 0,0413 |
| 1436597_at   | Ankhd1              | ankyrin repeat and KH domain containing 1                                                                                       | 0,75 | 0,0308 |
| 1417908_s_at | Ube2l3<br>A830021K0 | ubiquitin-conjugating enzyme E2L 3                                                                                              | 0,75 | 0,0443 |
| 1443979_at   | 8Rik                | RIKEN cDNA A830021K08 gene                                                                                                      | 0,75 | 0,0168 |
| 1438008_at   | Gga3                | golgi associated, gamma adaptin ear containing, ARF<br>binding protein 3                                                        | 0,75 | 0,0238 |
| 1456312_x_at | Gsn                 | gelsolin                                                                                                                        | 0,75 | 0,0078 |
| 1449575_a_at | Gstp1               | glutathione S-transferase, pi 1                                                                                                 | 0,75 | 0,0028 |
| 1424418_at   | Slc25a38            | solute carrier family 25, member 38                                                                                             | 0,75 | 0,0330 |
| 1415715_at   | Tmem129             | transmembrane protein 129                                                                                                       | 0,75 | 0,0308 |
| 1424205_at   | Smarca5             | SWI/SNF related, matrix associated, actin dependent<br>regulator of chromatin, subfamily a, member 5                            | 0,75 | 0,0391 |
| 1455227_at   | Aadacl1             | arylacetamide deacetylase-like 1                                                                                                | 0,75 | 0,0141 |

|              |                       |                                                                             |      |        |
|--------------|-----------------------|-----------------------------------------------------------------------------|------|--------|
| 1437350_at   | Dph1<br>2310067B1     | DPH1 homolog ( <i>S. cerevisiae</i> )                                       | 0,75 | 0,0351 |
| 1426984_at   | ORik                  | RIKEN cDNA 2310067B10 gene                                                  | 0,75 | 0,0081 |
| 1422612_at   | Hk2                   | hexokinase 2                                                                | 0,75 | 0,0210 |
| 1438317_a_at | D2Wsu81e              | DNA segment, Chr 2, Wayne State University 81,<br>expressed                 | 0,75 | 0,0447 |
| 1457285_at   | Zfp187                | zinc finger protein 187                                                     | 0,75 | 0,0303 |
| 1419428_a_at | Gaa<br>2310008B1      | glucosidase, alpha, acid                                                    | 0,75 | 0,0298 |
| 1453311_at   | ORik                  | RIKEN cDNA 2310008B10 gene                                                  | 0,75 | 0,0368 |
| 1424166_at   | Msh3                  | mutS homolog 3 ( <i>E. coli</i> )                                           | 0,75 | 0,0203 |
| 1437875_at   | Bicd2                 | bicaudal D homolog 2 ( <i>Drosophila</i> )                                  | 0,75 | 0,0324 |
| 1456763_at   | Mprp                  | myosin phosphatase Rho interacting protein                                  | 0,75 | 0,0293 |
| 1451754_a_at | Wdr45                 | WD repeat domain 45                                                         | 0,75 | 0,0138 |
| 1452053_a_at | Tmem33<br>2310022M    | transmembrane protein 33                                                    | 0,75 | 0,0196 |
| 1428293_at   | 17Rik                 | RIKEN cDNA 2310022M17 gene                                                  | 0,75 | 0,0223 |
| 1456013_x_at | Slc35a4               | solute carrier family 35, member A4                                         | 0,75 | 0,0381 |
| 1436113_a_at | St13                  | suppression of tumorigenicity 13                                            | 0,75 | 0,0220 |
| 1447784_x_at | Slc38a9               | solute carrier family 38, member 9                                          | 0,75 | 0,0442 |
| 1437171_x_at | Gsn                   | gelsolin                                                                    | 0,76 | 0,0086 |
| 1423663_at   | Fln                   | folliculin                                                                  | 0,76 | 0,0449 |
| 1448096_at   | Ogfod1                | 2-oxoglutarate and iron-dependent oxygenase domain<br>containing 1          | 0,76 | 0,0422 |
| 1449608_a_at | NA<br>2810013P0       | NA                                                                          | 0,76 | 0,0273 |
| 1429767_at   | 6Rik                  | RIKEN cDNA 2810013P06 gene                                                  | 0,76 | 0,0274 |
| 1449150_at   | Krba1                 | KRAB-A domain containing 1                                                  | 0,76 | 0,0391 |
| 1434551_at   | Hnrnpul2<br>2810004N2 | heterogeneous nuclear ribonucleoprotein U-like 2                            | 0,76 | 0,0279 |
| 1434870_at   | 3Rik                  | RIKEN cDNA 2810004N23 gene                                                  | 0,76 | 0,0186 |
| 1458527_at   | NA                    | NA                                                                          | 0,76 | 0,0249 |
| 1424103_at   | Atg4b                 | autophagy-related 4B (yeast)                                                | 0,76 | 0,0128 |
| 1422524_at   | Abcb6                 | ATP-binding cassette, sub-family B (MDR/TAP),<br>member 6                   | 0,76 | 0,0496 |
| 1428502_at   | Actr6                 | ARP6 actin-related protein 6 homolog (yeast)                                | 0,76 | 0,0394 |
| 1427191_at   | Npr2                  | natriuretic peptide receptor 2                                              | 0,76 | 0,0449 |
| 1437379_x_at | Trap1                 | TNF receptor-associated protein 1                                           | 0,76 | 0,0117 |
| 1434151_at   | Mettl7a1              | methyltransferase like 7A1                                                  | 0,76 | 0,0194 |
| 1452105_a_at | Tsc2                  | tuberous sclerosis 2                                                        | 0,76 | 0,0153 |
| 1427045_at   | Synpo                 | synaptopodin                                                                | 0,76 | 0,0464 |
| 1424052_at   | Thap4<br>1110003E0    | THAP domain containing 4                                                    | 0,76 | 0,0173 |
| 1435464_at   | 1Rik<br>3021401C1     | RIKEN cDNA 1110003E01 gene                                                  | 0,76 | 0,0128 |
| 1453782_at   | 2Rik<br>2700078E1     | RIKEN cDNA 3021401C12 gene                                                  | 0,76 | 0,0436 |
| 1451556_a_at | 1Rik                  | RIKEN cDNA 2700078E11 gene                                                  | 0,76 | 0,0442 |
| 1455734_at   | Crbn                  | cereblon                                                                    | 0,76 | 0,0456 |
| 1418593_at   | Taf6                  | TAF6 RNA polymerase II, TATA box binding protein<br>(TBP)-associated factor | 0,76 | 0,0477 |
| 1452996_a_at | Aven                  | apoptosis, caspase activation inhibitor                                     | 0,76 | 0,0443 |
| 1426624_a_at | Ypel3                 | yippee-like 3 ( <i>Drosophila</i> )                                         | 0,76 | 0,0375 |
| 1423575_a_at | Wbscr22               | Williams Beuren syndrome chromosome region 22                               | 0,76 | 0,0461 |
| 1416522_a_at | Grcc10                | gene rich cluster, C10 gene                                                 | 0,76 | 0,0102 |
| 1451525_at   | Arhgap12<br>4930453J0 | Rho GTPase activating protein 12                                            | 0,76 | 0,0373 |
| 1454406_at   | 4Rik                  | RIKEN cDNA 4930453J04 gene                                                  | 0,77 | 0,0081 |

|              |                      |                                                                                                               |      |        |
|--------------|----------------------|---------------------------------------------------------------------------------------------------------------|------|--------|
| 1429315_at   | Syt11                | synaptotagmin XI                                                                                              | 0,77 | 0,0180 |
| 1427014_at   | Dennd4b<br>2810416G2 | DENN/MADD domain containing 4B                                                                                | 0,77 | 0,0275 |
| 1435171_at   | ORik                 | RIKEN cDNA 2810416G20 gene                                                                                    | 0,77 | 0,0422 |
| 1422797_at   | Robld3<br>2410022L0  | roadblock domain containing 3                                                                                 | 0,77 | 0,0253 |
| 1448971_at   | 5Rik                 | RIKEN cDNA 2410022L05 gene                                                                                    | 0,77 | 0,0319 |
| 1421962_at   | Dnajb5               | DnaJ (Hsp40) homolog, subfamily B, member 5                                                                   | 0,77 | 0,0361 |
| 1429539_at   | Bcl2l13              | BCL2-like 13 (apoptosis facilitator)                                                                          | 0,77 | 0,0214 |
| 1426041_a_at | Fgd4                 | FYVE, RhoGEF and PH domain containing 4 succinate-Coenzyme A ligase, GDP-forming, beta subunit                | 0,77 | 0,0391 |
| 1435841_s_at | Suclg2               | subunit                                                                                                       | 0,77 | 0,0173 |
| 1458339_at   | Cdadc1<br>2700029M   | cytidine and dCMP deaminase domain containing 1                                                               | 0,77 | 0,0442 |
| 1452877_at   | 09Rik                | RIKEN cDNA 2700029M09 gene                                                                                    | 0,77 | 0,0385 |
| 1423229_at   | Inpp5e               | inositol polyphosphate-5-phosphatase E                                                                        | 0,77 | 0,0184 |
| 1435813_at   | Mypn                 | myopalladin                                                                                                   | 0,77 | 0,0203 |
| 1426445_at   | Ctage5               | CTAGE family, member 5                                                                                        | 0,77 | 0,0218 |
| 1455187_at   | Zbtb40               | zinc finger and BTB domain containing 40                                                                      | 0,77 | 0,0390 |
| 1435443_at   | Eya3                 | eyes absent 3 homolog (Drosophila) mitogen-activated protein kinase-activated protein kinase 3                | 0,77 | 0,0440 |
| 1437494_at   | Mapkapk3             | kinase 3                                                                                                      | 0,77 | 0,0410 |
| 1425975_a_at | Mapk8ip3             | mitogen-activated protein kinase 8 interacting protein 3                                                      | 0,77 | 0,0169 |
| 1418793_at   | Idua                 | iduronidase, alpha-L-                                                                                         | 0,77 | 0,0295 |
| 1417142_at   | Fam120b              | family with sequence similarity 120, member B                                                                 | 0,77 | 0,0210 |
| 1450884_at   | Cd36                 | CD36 antigen                                                                                                  | 0,77 | 0,0196 |
| 1455747_at   | Ggt5                 | gamma-glutamyltransferase 5 protein phosphatase 1A, magnesium dependent, alpha isoform                        | 0,77 | 0,0476 |
| 1417221_at   | Ppm1a                | isoform                                                                                                       | 0,77 | 0,0355 |
| 1435733_x_at | Rnaseh2c             | ribonuclease H2, subunit C                                                                                    | 0,77 | 0,0443 |
| 1433586_at   | Rgmb                 | RGM domain family, member B                                                                                   | 0,77 | 0,0283 |
| 1430107_at   | Acbd7                | acyl-Coenzyme A binding domain containing 7                                                                   | 0,77 | 0,0495 |
| 1433514_at   | Etnk1                | ethanolamine kinase 1                                                                                         | 0,77 | 0,0496 |
| 1427407_s_at | Trip11               | thyroid hormone receptor interactor 11                                                                        | 0,77 | 0,0422 |
| 1419380_at   | Zfp423<br>2610024G1  | zinc finger protein 423                                                                                       | 0,77 | 0,0499 |
| 1418222_at   | 4Rik                 | RIKEN cDNA 2610024G14 gene                                                                                    | 0,77 | 0,0428 |
| 1435417_at   | AI464131             | expressed sequence AI464131                                                                                   | 0,77 | 0,0180 |
| 1451264_at   | Frmd6                | FERM domain containing 6                                                                                      | 0,77 | 0,0443 |
| 1436991_x_at | Gsn                  | gelsolin                                                                                                      | 0,77 | 0,0147 |
| 1434710_at   | Dhx29                | DEAH (Asp-Glu-Ala-His) box polypeptide 29                                                                     | 0,77 | 0,0214 |
| 1419835_s_at | Plec1                | plectin 1                                                                                                     | 0,77 | 0,0406 |
| 1417088_at   | Zfp346               | zinc finger protein 346                                                                                       | 0,77 | 0,0342 |
| 1453230_at   | Zfp74                | zinc finger protein 74                                                                                        | 0,77 | 0,0411 |
| 1425492_at   | Bmpr1a               | bone morphogenetic protein receptor, type 1A                                                                  | 0,77 | 0,0422 |
| 1454873_at   | Zfp775               | zinc finger protein 775                                                                                       | 0,77 | 0,0330 |
| 1435787_at   | Ppm1l                | protein phosphatase 1 (formerly 2C)-like                                                                      | 0,77 | 0,0398 |
| 1416513_at   | Lamb2<br>2310042D1   | laminin, beta 2                                                                                               | 0,77 | 0,0443 |
| 1429598_at   | 9Rik                 | RIKEN cDNA 2310042D19 gene                                                                                    | 0,77 | 0,0138 |
| 1415691_at   | Dlg1                 | discs, large homolog 1 (Drosophila)                                                                           | 0,77 | 0,0430 |
| 1435836_at   | Pdk1                 | pyruvate dehydrogenase kinase, isoenzyme 1                                                                    | 0,77 | 0,0235 |
| 1433799_at   | Rdh13                | retinol dehydrogenase 13 (all-trans and 9-cis)                                                                | 0,77 | 0,0456 |
| 1455450_at   | Ptpn3                | protein tyrosine phosphatase, non-receptor type 3 glycerophosphodiester phosphodiesterase domain containing 1 | 0,77 | 0,0284 |
| 1424076_at   | Gdpd1                | containing 1                                                                                                  | 0,78 | 0,0481 |
| 1420630_at   | 8430419L0            | RIKEN cDNA 8430419L09 gene                                                                                    | 0,78 | 0,0444 |

|              |           |                                                                                                       |      |        |
|--------------|-----------|-------------------------------------------------------------------------------------------------------|------|--------|
|              | 9Rik      |                                                                                                       |      |        |
| 1423925_at   | Dhx16     | DEAH (Asp-Glu-Ala-His) box polypeptide 16                                                             | 0,78 | 0,0238 |
| 1427342_at   | Fastkd1   | FAST kinase domains 1                                                                                 | 0,78 | 0,0390 |
| 1424054_at   | Btbd2     | BTB (POZ) domain containing 2                                                                         | 0,78 | 0,0337 |
| 1426583_at   | Atf2      | activating transcription factor 2                                                                     | 0,78 | 0,0128 |
| 1453097_a_at | Ubtf      | upstream binding transcription factor, RNA polymerase I                                               | 0,78 | 0,0105 |
| 1427917_s_at | Ssbp3     | single-stranded DNA binding protein 3                                                                 | 0,78 | 0,0086 |
| 1427887_at   | Rprd1b    | regulation of nuclear pre-mRNA domain containing 1B                                                   | 0,78 | 0,0190 |
| 1421469_a_at | Stat5a    | signal transducer and activator of transcription 5A                                                   | 0,78 | 0,0433 |
| 1423360_at   | Yme111    | YME1-like 1 ( <i>S. cerevisiae</i> )                                                                  | 0,78 | 0,0430 |
| 1418463_at   | Pik3r2    | phosphatidylinositol 3-kinase, regulatory subunit, polypeptide 2 (p85 beta)                           | 0,78 | 0,0365 |
| 1429748_at   | Qk        | quaking                                                                                               | 0,78 | 0,0127 |
| 1455244_at   | Daam1     | dishevelled associated activator of morphogenesis 1                                                   | 0,78 | 0,0443 |
| 1420510_at   | Srfbp1    | serum response factor binding protein 1                                                               | 0,78 | 0,0303 |
| 1448900_at   | D16H22S6  |                                                                                                       |      |        |
| 1448900_at   | 80E       | DNA segment, Chr 16, human D22S680E, expressed                                                        | 0,78 | 0,0358 |
| 1451970_at   | Daglb     | diacylglycerol lipase, beta                                                                           | 0,78 | 0,0299 |
| 1435684_at   | Abcc5     | ATP-binding cassette, sub-family C (CFTR/MRP), member 5                                               | 0,78 | 0,0308 |
| 1459640_at   | NA        | NA                                                                                                    | 0,78 | 0,0147 |
| 1443890_at   | NA        | NA                                                                                                    | 0,78 | 0,0167 |
| 1451980_at   | Casd1     | CAS1 domain containing 1                                                                              | 0,78 | 0,0308 |
| 1415714_a_at | Snrnp27   | small nuclear ribonucleoprotein 27 (U4/U6.U5) ATP-binding cassette, sub-family C (CFTR/MRP), member 9 | 0,78 | 0,0260 |
| 1435752_s_at | Abcc9     | member 9                                                                                              | 0,78 | 0,0347 |
| 1434190_at   | Sms       | spermine synthase                                                                                     | 0,78 | 0,0128 |
| 1452637_a_at | Bola1     | bolA-like 1 ( <i>E. coli</i> )                                                                        | 0,78 | 0,0128 |
| 1457245_at   | Dirc2     | disrupted in renal carcinoma 2 (human)                                                                | 0,78 | 0,0279 |
| 1423958_a_at | Ttc33     | tetratricopeptide repeat domain 33                                                                    | 0,79 | 0,0099 |
| 1415949_at   | Cpe       | carboxypeptidase E                                                                                    | 0,79 | 0,0136 |
| 1435538_at   | 0610030E2 |                                                                                                       |      |        |
| 1435538_at   | 0Rik      | RIKEN cDNA 0610030E20 gene                                                                            | 0,79 | 0,0326 |
| 1418342_at   | Rfc1      | replication factor C (activator 1) 1                                                                  | 0,79 | 0,0443 |
| 1428613_at   | Ldhd      | lactate dehydrogenase D                                                                               | 0,79 | 0,0241 |
| 1459868_x_at | 100038993 | predicted gene, 100038993                                                                             | 0,79 | 0,0185 |
| 1421052_a_at | Sms       | spermine synthase                                                                                     | 0,79 | 0,0231 |
| 1423613_at   | Ssfa2     | sperm specific antigen 2                                                                              | 0,79 | 0,0371 |
| 1451677_at   | Narf      | nuclear prelamin A recognition factor                                                                 | 0,79 | 0,0387 |
| 1416616_s_at | Clpp      | caseinolytic peptidase, ATP-dependent, proteolytic subunit homolog ( <i>E. coli</i> )                 | 0,79 | 0,0284 |
| 1452791_at   | Coq2      | coenzyme Q2 homolog, prenyltransferase (yeast)                                                        | 0,79 | 0,0109 |
| 1428365_a_at | Lonp1     | lon peptidase 1, mitochondrial                                                                        | 0,79 | 0,0172 |
| 1449097_at   | Txnrd2    | thioredoxin reductase 2                                                                               | 0,79 | 0,0167 |
| 1435867_at   | Jhdm1d    | jumonji C domain-containing histone demethylase 1 homolog D ( <i>S. cerevisiae</i> )                  | 0,79 | 0,0139 |
| 1460252_s_at | Zfp105    | zinc finger protein 105                                                                               | 0,79 | 0,0348 |
| 1449003_a_at | Vti1b     | vesicle transport through interaction with t-SNAREs 1B homolog                                        | 0,79 | 0,0113 |
| 1457826_a_at | 1810043H0 |                                                                                                       |      |        |
| 1457826_a_at | 4Rik      | RIKEN cDNA 1810043H04 gene                                                                            | 0,79 | 0,0470 |
| 1435025_at   | Ogfod1    | 2-oxoglutarate and iron-dependent oxygenase domain containing 1                                       | 0,79 | 0,0432 |
| 1456072_at   | Ppp1r9a   | protein phosphatase 1, regulatory (inhibitor) subunit 9A                                              | 0,79 | 0,0365 |
| 1424006_at   | Aarsd1    | alanyl-tRNA synthetase domain containing 1                                                            | 0,79 | 0,0428 |
| 1417247_at   | AI597479  | expressed sequence AI597479                                                                           | 0,79 | 0,0194 |

|              |           |                                                     |      |        |
|--------------|-----------|-----------------------------------------------------|------|--------|
| 1452943_at   | Tmem65    | transmembrane protein 65                            | 0,79 | 0,0391 |
| 1455434_a_at | Ktn1      | kinectin 1                                          | 0,79 | 0,0152 |
| 1458721_at   | Pcdhg@    | protocadherin gamma cluster                         | 0,79 | 0,0238 |
| 1418347_at   | Ccdc22    | coiled-coil domain containing 22                    | 0,79 | 0,0375 |
|              | C230091D  |                                                     |      |        |
| 1438695_at   | 08Rik     | RIKEN cDNA C230091D08 gene                          | 0,79 | 0,0215 |
| 1435878_at   | Stk38l    | serine/threonine kinase 38 like                     | 0,79 | 0,0155 |
|              | 9930024M  |                                                     |      |        |
| 1457801_at   | 15Rik     | RIKEN cDNA 9930024M15 gene                          | 0,79 | 0,0449 |
| 1423044_at   | Prosc     | proline synthetase co-transcribed                   | 0,79 | 0,0246 |
|              | 4732418C0 |                                                     |      |        |
| 1433875_at   | 7Rik      | RIKEN cDNA 4732418C07 gene                          | 0,79 | 0,0189 |
| 1423532_at   | Rnf44     | ring finger protein 44                              | 0,80 | 0,0297 |
| 1424377_at   | BC003885  | cDNA sequence BC003885                              | 0,80 | 0,0326 |
| 1451170_s_at | Nomo1     | nodal modulator 1                                   | 0,80 | 0,0428 |
| 1441919_x_at | Crat      | carnitine acetyltransferase                         | 0,80 | 0,0287 |
| 1434179_at   | Mll3      | myeloid/lymphoid or mixed-lineage leukemia 3        | 0,80 | 0,0303 |
| 1427274_at   | Rnf214    | ring finger protein 214                             | 0,80 | 0,0139 |
| 1424282_at   | Pet112l   | PET112-like (yeast)                                 | 0,80 | 0,0252 |
| 1455621_at   | BC066107  | cDNA sequence BC066107                              | 0,80 | 0,0161 |
| 1416655_at   | C1galt1c1 | C1GALT1-specific chaperone 1                        | 0,80 | 0,0444 |
| 1455829_at   | Usp14     | ubiquitin specific peptidase 14                     | 0,80 | 0,0410 |
| 1424949_at   | Huwe1     | HECT, UBA and WWE domain containing 1               | 0,80 | 0,0348 |
| 1433669_at   | Akap8     | A kinase (PRKA) anchor protein 8                    | 0,80 | 0,0213 |
| 1454902_at   | Prkcz     | protein kinase C, zeta                              | 0,80 | 0,0391 |
| 1430417_s_at | Neur14    | neuralized homolog 4 (Drosophila)                   | 0,80 | 0,0348 |
| 1441192_at   | Scly      | selenocysteine lyase                                | 0,80 | 0,0355 |
| 1425773_s_at | Nmnat1    | nicotinamide nucleotide adenyltransferase 1         | 0,80 | 0,0499 |
| 1422103_a_at | Stat5b    | signal transducer and activator of transcription 5B | 0,80 | 0,0413 |
| 1444998_at   | NA        | NA                                                  | 0,80 | 0,0172 |
| 1419687_at   | MacroD1   | MACRO domain containing 1                           | 0,80 | 0,0215 |
| 1417964_at   | Ap3d1     | adaptor-related protein complex 3, delta 1 subunit  | 0,81 | 0,0330 |
| 1450690_at   | Ranbp2    | RAN binding protein 2                               | 0,81 | 0,0293 |
| 1460548_a_at | Eral1     | Era (G-protein)-like 1 (E. coli)                    | 0,81 | 0,0444 |
| 1448247_at   | Bcl7b     | B-cell CLL/lymphoma 7B                              | 0,81 | 0,0140 |
| 1444774_at   | Det1      | de-etiolated homolog 1 (Arabidopsis)                | 0,81 | 0,0462 |
| 1455481_at   | Ids       | iduronate 2-sulfatase                               | 0,81 | 0,0134 |
| 1416224_at   | Zbtb17    | zinc finger and BTB domain containing 17            | 0,81 | 0,0217 |
| 1427446_s_at | Ttn       | titin                                               | 0,81 | 0,0277 |
| 1442752_at   | NA        | NA                                                  | 0,81 | 0,0215 |
| 1424336_at   | Ppcdc     | phosphopantothienoylcysteine decarboxylase          | 0,81 | 0,0452 |
| 1460446_at   | Wrb       | tryptophan rich basic protein                       | 0,81 | 0,0375 |
|              |           | 1-acylglycerol-3-phosphate O-acyltransferase 2      |      |        |
| 1428821_at   | Agpat2    | (lysophosphatidic acid acyltransferase, beta)       | 0,81 | 0,0473 |
|              | 1700020I1 |                                                     |      |        |
| 1428411_at   | 4Rik      | RIKEN cDNA 1700020I14 gene                          | 0,81 | 0,0373 |
| 1416534_at   | Dpf2      | D4, zinc and double PHD fingers family 2            | 0,81 | 0,0106 |
| 1424368_s_at | Ubqln1    | ubiquilin 1                                         | 0,81 | 0,0290 |
| 1433497_at   | Aqr       | aquarius                                            | 0,81 | 0,0171 |
| 1451665_a_at | Ap4s1     | adaptor-related protein complex AP-4, sigma 1       | 0,81 | 0,0361 |
|              |           | nudix (nucleoside diphosphate linked moiety X)-type |      |        |
| 1453685_at   | Nudt7     | motif 7                                             | 0,81 | 0,0373 |
| 1452116_s_at | Atf2      | activating transcription factor 2                   | 0,81 | 0,0451 |
|              | 5730494N0 |                                                     |      |        |
| 1452773_at   | 6Rik      | RIKEN cDNA 5730494N06 gene                          | 0,82 | 0,0499 |
| 1423785_at   | Egln1     | EGL nine homolog 1 (C. elegans)                     | 0,82 | 0,0131 |

|              |         |                                                                                      |      |        |
|--------------|---------|--------------------------------------------------------------------------------------|------|--------|
| 1423534_at   | Pdcd2   | programmed cell death 2                                                              | 0,82 | 0,0278 |
| 1435501_at   | Atg2b   | ATG2 autophagy related 2 homolog B ( <i>S. cerevisiae</i> )                          | 0,82 | 0,0394 |
| 1454657_s_at | Mak10   | MAK10 homolog, amino-acid N-acetyltransferase subunit, ( <i>S. cerevisiae</i> )      | 0,82 | 0,0355 |
| 1454982_at   | Arfgef2 | ADP-ribosylation factor guanine nucleotide-exchange factor 2 (brefeldin A-inhibited) | 0,82 | 0,0284 |
| 1417674_s_at | Golga4  | golgi autoantigen, golgin subfamily a, 4                                             | 0,82 | 0,0158 |
| 1456569_x_at | Gsn     | gelsolin                                                                             | 0,82 | 0,0341 |
| 1426760_at   | Ipo8    | importin 8                                                                           | 0,82 | 0,0368 |
| 1452052_s_at | Eif3j   | eukaryotic translation initiation factor 3, subunit J                                | 0,82 | 0,0298 |
| 1426382_at   | Ppm1b   | protein phosphatase 1B, magnesium dependent, beta isoform                            | 0,82 | 0,0291 |
| 1417099_at   | Ftsj1   | FtsJ homolog 1 ( <i>E. coli</i> )                                                    | 0,82 | 0,0499 |
| 1453518_at   | Pdzd11  | PDZ domain containing 11                                                             | 0,82 | 0,0448 |
| 1423690_s_at | Gpsm1   | G-protein signalling modulator 1 (AGS3-like, <i>C. elegans</i> )                     | 0,82 | 0,0256 |
| 1428473_at   | Ppp3cb  | protein phosphatase 3, catalytic subunit, beta isoform                               | 0,82 | 0,0375 |
| 1418815_at   | Cdh2    | cadherin 2                                                                           | 0,82 | 0,0479 |
| 1425052_at   | Isoc1   | isochorismatase domain containing 1                                                  | 0,82 | 0,0242 |
| 1435029_at   | NA      | NA                                                                                   | 0,82 | 0,0376 |
| 1427988_s_at | Safb2   | scaffold attachment factor B2                                                        | 0,83 | 0,0379 |
| 1418584_at   | Ccnh    | cyclin H                                                                             | 0,83 | 0,0449 |
| 1417241_at   | Amz2    | archaelysin family metallopeptidase 2                                                | 0,83 | 0,0203 |
| 1455205_a_at | Usp19   | ubiquitin specific peptidase 19                                                      | 0,83 | 0,0337 |
| 1427185_at   | Mef2a   | myocyte enhancer factor 2A                                                           | 0,83 | 0,0432 |
| 1455958_s_at | Pptc7   | PTC7 protein phosphatase homolog ( <i>S. cerevisiae</i> )                            | 0,83 | 0,0211 |
| 1436705_at   | Mmgt1   | membrane magnesium transporter 1                                                     | 0,84 | 0,0428 |
| 1441646_at   | Vta1    | Vps20-associated 1 homolog ( <i>S. cerevisiae</i> )                                  | 0,84 | 0,0471 |
| 1425628_a_at | Gtf2i   | general transcription factor II I                                                    | 0,85 | 0,0467 |
| 1433834_at   | Mrz 06  | membrane-associated ring finger (C3HC4) 6                                            | 0,85 | 0,0443 |
| 1438742_at   | Zfp629  | zinc finger protein 629                                                              | 0,85 | 0,0477 |

**Table III****Differential regulated between Shunt vs. TAC and also significantly regulated to the corresponding Sham**

| <b>Affymetrix probe set identification</b> | <b>Gene symbol</b> | <b>Gene name</b>                                          | <b>Fold change TAC</b> | <b>Fold change Shunt</b> | <b>Adjusted P value TAC vs Shunt</b> |
|--------------------------------------------|--------------------|-----------------------------------------------------------|------------------------|--------------------------|--------------------------------------|
| 1416342_at                                 | Tnc                | tenascin C                                                | 8,91                   | 1,93                     | 0,0000                               |
| 1418219_at                                 | Il15               | interleukin 15                                            | 0,28                   | 0,61                     | 0,0000                               |
| 1422168_at                                 | Bdnf               | brain derived neurotrophic factor                         | 1,60                   | 0,67                     | 0,0000                               |
| 1425603_at                                 | Tmem176a           | transmembrane protein 176A                                | 2,37                   | 1,38                     | 0,0000                               |
| 1426382_at                                 | Ppm1b              | protein phosphatase 1B, magnesium dependent, beta isoform | 1,29                   | 0,82                     | 0,0000                               |
| 1427939_at                                 | Mycbp              | c-myc binding protein                                     | 0,82                   | 1,31                     | 0,0000                               |
| 1433581_at                                 | Rik                | RIKEN cDNA 1190002N15 gene                                | 1,43                   | 0,63                     | 0,0000                               |
| 1433761_at                                 | Pde4dip            | phosphodiesterase 4D interacting protein (myomegalin)     | 1,59                   | 0,65                     | 0,0000                               |
| 1435029_at                                 | NA                 | NA                                                        | 1,17                   | 0,82                     | 0,0001                               |
| 1435878_at                                 | Stk38l             | serine/threonine kinase 38 like                           | 1,22                   | 0,79                     | 0,0000                               |
| 1447830_at                                 | Rgs2               | regulator of G-protein signaling 2                        | 0,33                   | 0,63                     | 0,0002                               |
| 1449396_at                                 | Aoc3               | amine oxidase, copper containing 3                        | 0,78                   | 1,32                     | 0,0001                               |
| 1452649_at                                 | Rtn4               | reticulon 4                                               | 2,10                   | 1,30                     | 0,0000                               |
| 1455656_at                                 | Btla               | B and T lymphocyte associated                             | 1,40                   | 0,73                     | 0,0000                               |
| 1460227_at                                 | Timp1              | tissue inhibitor of metalloproteinase 1                   | 18,87                  | 2,70                     | 0,0000                               |



## Differential regulated between Shunt vs. TAC and between TAC and Sham but not Shunt and Sham

| Affymetrix probe set identification | Gene symbol | Gene name                                                                  | Fold change TAC | Adjusted P value TAC vs Shunt |
|-------------------------------------|-------------|----------------------------------------------------------------------------|-----------------|-------------------------------|
| 1415690_at                          | Mrpl27      | mitochondrial ribosomal protein L27                                        | 0,76            | 0,0002                        |
| 1416225_at                          | Adh1        | alcohol dehydrogenase 1 (class I)                                          | 0,48            | 0,0001                        |
| 1416658_at                          | Frzb        | frizzled-related protein                                                   | 2,32            | 0,0001                        |
| 1417178_at                          | Gipc2       | GIPC PDZ domain containing family, member 2                                | 1,84            | 0,0001                        |
| 1417193_at                          | Sod2        | superoxide dismutase 2, mitochondrial                                      | 0,84            | 0,0002                        |
| 1417214_at                          | Rab27b      | RAB27b, member RAS oncogene family                                         | 1,73            | 0,0002                        |
| 1417262_at                          | Ptgs2       | prostaglandin-endoperoxide synthase 2                                      | 2,48            | 0,0001                        |
| 1417311_at                          | Crip2       | cysteine rich protein 2                                                    | 0,68            | 0,0002                        |
| 1417639_at                          | Slc22a4     | solute carrier family 22 (organic cation transporter), member 4            | 2,41            | 0,0001                        |
| 1417675_at                          | Mdn1        | midasin homolog (yeast)                                                    | 1,28            | 0,0001                        |
| 1417688_at                          | Fam20c      | family with sequence similarity 20, member C                               | 2,06            | 0,0000                        |
| 1417814_at                          | Pla2g5      | phospholipase A2, group V                                                  | 0,43            | 0,0002                        |
| 1418061_at                          | Ltbp2       | latent transforming growth factor beta binding protein 2                   | 4,83            | 0,0001                        |
| 1418465_at                          | Ncf4        | neutrophil cytosolic factor 4                                              | 2,21            | 0,0001                        |
| 1418476_at                          | Crlf1       | cytokine receptor-like factor 1                                            | 4,00            | 0,0001                        |
| 1418501_at                          | Oxr1        | oxidation resistance 1                                                     | 0,72            | 0,0002                        |
| 1418599_at                          | Col11a1     | collagen, type XI, alpha 1                                                 | 1,70            | 0,0002                        |
| 1418729_at                          | Star        | steroidogenic acute regulatory protein                                     | 1,62            | 0,0001                        |
| 1419132_at                          | Tlr2        | toll-like receptor 2                                                       | 1,55            | 0,0002                        |
| 1419182_at                          | Svep1       | sushi, von Willebrand factor type A, EGF and pentraxin domain containing 1 | 1,98            | 0,0001                        |
| 1419207_at                          | Zfp37       | zinc finger protein 37                                                     | 1,29            | 0,0002                        |
| 1419220_at                          | Xirp1       | xin actin-binding repeat containing 1                                      | 2,02            | 0,0002                        |
| 1419276_at                          | Enpp1       | ectonucleotide pyrophosphatase/phosphodiesterase 1                         | 3,43            | 0,0002                        |
| 1419340_at                          | Mov10l1     | Moloney leukemia virus 10-like 1                                           | 0,47            | 0,0001                        |
| 1419519_at                          | Igf1        | insulin-like growth factor 1                                               | 3,10            | 0,0001                        |
| 1419577_at                          | Fig4        | FIG4 homolog (S. cerevisiae)                                               | 0,62            | 0,0002                        |
| 1419598_at                          | Ms4a6d      | membrane-spanning 4-domains, subfamily A, member 6D                        | 3,67            | 0,0002                        |
| 1419599_at                          | Ms4a6d      | membrane-spanning 4-domains, subfamily A, member 6D                        | 3,50            | 0,0002                        |
| 1419625_at                          | Hspa1l      | heat shock protein 1-like                                                  | 1,71            | 0,0001                        |
| 1419666_at                          | Nupr1       | nuclear protein 1                                                          | 2,12            | 0,0002                        |
| 1419994_at                          | D10Ert641e  | DNA segment, Chr 10, ERATO Doi 641, expressed                              | 0,75            | 0,0002                        |
| 1420860_at                          | Itga9       | integrin alpha 9                                                           | 1,48            | 0,0002                        |
| 1421075_at                          | Cyp7b1      | cytochrome P450, family 7, subfamily b, polypeptide 1                      | 1,54            | 0,0002                        |
| 1421186_at                          | Ccr2        | chemokine (C-C motif) receptor 2                                           | 1,50            | 0,0001                        |
| 1421253_at                          | Nrap        | nebulin-related anchoring protein                                          | 1,42            | 0,0002                        |
| 1421262_at                          | Lipg        | lipase, endothelial                                                        | 0,83            | 0,0001                        |
| 1422069_at                          | Mc1r        | melanocortin 1 receptor                                                    | 0,79            | 0,0002                        |
| 1422124_at                          | Ptprc       | protein tyrosine phosphatase, receptor type, C                             | 2,55            | 0,0001                        |

|            |          |                                                             |      |        |
|------------|----------|-------------------------------------------------------------|------|--------|
| at         |          |                                                             |      |        |
| 1422864_at | Runx1    | runt related transcription factor 1                         | 2,36 | 0,0001 |
| 1422973_a_ |          | thyroid hormone responsive SPOT14 homolog                   |      |        |
| at         | Thrsp    | (Rattus)                                                    | 0,57 | 0,0002 |
| 1423250_a_ |          |                                                             |      |        |
| at         | Tgfb2    | transforming growth factor, beta 2                          | 4,01 | 0,0001 |
| 1423577_at | Ankrd32  | ankyrin repeat domain 32                                    | 0,49 | 0,0001 |
| 1423615_at | Rnf115   | ring finger protein 115                                     | 2,14 | 0,0002 |
| 1423760_at | Cd44     | CD44 antigen                                                | 3,87 | 0,0001 |
|            |          | protein kinase, AMP-activated, beta 1 non-catalytic subunit |      |        |
| 1424119_at | Prkab1   |                                                             | 0,65 | 0,0001 |
| 1424845_a_ |          |                                                             |      |        |
| at         | Cep68    | centrosomal protein 68                                      | 0,70 | 0,0002 |
| 1425315_at | Dock7    | dedicator of cytokinesis 7                                  | 1,47 | 0,0002 |
| 1425832_a_ |          |                                                             |      |        |
| at         | Cxcr6    | chemokine (C-X-C motif) receptor 6                          | 2,26 | 0,0002 |
| 1426541_a_ |          |                                                             |      |        |
| at         | Endod1   | endonuclease domain containing 1                            | 6,42 | 0,0002 |
|            |          | ribonuclease L (2', 5'-oligoadenylate synthetase-dependent) |      |        |
| 1426604_at | Rnasel   |                                                             | 1,77 | 0,0002 |
| 1426909_at | Uck2     | uridine-cytidine kinase 2                                   | 3,38 | 0,0000 |
| 1427076_at | Mpeg1    | macrophage expressed gene 1                                 | 1,82 | 0,0001 |
|            |          | 6-phosphofructo-2-kinase/fructose-2,6-biphosphatase 1       |      |        |
| 1427213_at | Pfkfb1   |                                                             | 0,35 | 0,0001 |
| 1427582_at | Fgf6     | fibroblast growth factor 6                                  | 2,50 | 0,0001 |
| 1427966_at | Fam105b  | family with sequence similarity 105, member B               | 1,95 | 0,0001 |
| 1428589_at | Mrpl41   | mitochondrial ribosomal protein L41                         | 0,84 | 0,0002 |
| 1428902_at | Chst11   | carbohydrate sulfotransferase 11                            | 1,44 | 0,0001 |
| 1429178_at | Odz3     | odd Oz/ten-m homolog 3 (Drosophila)                         | 1,56 | 0,0002 |
| 1429549_at | Col27a1  | collagen, type XXVII, alpha 1                               | 1,35 | 0,0002 |
| 1429768_at | Dtna     | dystrobrevin alpha                                          | 1,55 | 0,0001 |
| 1430695_at | Tlr4     | toll-like receptor 4                                        | 2,20 | 0,0001 |
|            |          | 1110002E22                                                  |      |        |
| 1430786_at | Rik      | RIKEN cDNA 1110002E22 gene                                  | 2,07 | 0,0001 |
| 1431293_a_ |          |                                                             |      |        |
| at         | Cldnd1   | claudin domain containing 1                                 | 2,08 | 0,0002 |
| 1433434_at | AW551984 | expressed sequence AW551984                                 | 1,79 | 0,0000 |
| 1433857_at | Fat1     | FAT tumor suppressor homolog 1 (Drosophila)                 | 1,60 | 0,0002 |
| 1433982_at | Usp28    | ubiquitin specific peptidase 28                             | 1,69 | 0,0001 |
|            |          | ribosomal RNA processing 12 homolog (S. cerevisiae)         |      |        |
| 1434239_at | Rrp12    |                                                             | 1,98 | 0,0001 |
| 1434376_at | Cd44     | CD44 antigen                                                | 2,74 | 0,0001 |
| 1434447_at | Met      | met proto-oncogene                                          | 1,65 | 0,0002 |
| 1434672_at | Gpr22    | G protein-coupled receptor 22                               | 0,17 | 0,0002 |
| 1435149_at | Plcg1    | phospholipase C, gamma 1                                    | 0,79 | 0,0002 |
| 1435331_at | Pyhin1   | pyrin and HIN domain family, member 1                       | 1,56 | 0,0002 |
| 1435585_at | Tceal7   | transcription elongation factor A (SII)-like 7              | 2,74 | 0,0001 |
| 1435588_at | Wdfy1    | WD repeat and FYVE domain containing 1                      | 1,51 | 0,0001 |
| 1436329_at | Egr3     | early growth response 3                                     | 6,91 | 0,0002 |
| 1436336_at | Pthr1    | peptidyl-tRNA hydrolase 1 homolog (S. cerevisiae)           | 1,50 | 0,0001 |
| 1436870_s_ |          |                                                             |      |        |
| at         | Afap1l2  | actin filament associated protein 1-like 2                  | 1,91 | 0,0002 |
|            |          | RNA binding motif, single stranded interacting protein      |      |        |
| 1436937_at | Rbms3    |                                                             | 1,74 | 0,0001 |
| 1437009_a_ |          |                                                             |      |        |
| at         | Rnf115   | ring finger protein 115                                     | 2,19 | 0,0001 |
| 1437218_at | Fn1      | fibronectin 1                                               | 2,29 | 0,0001 |
| 1437284_at | Fzd1     | frizzled homolog 1 (Drosophila)                             | 1,94 | 0,0002 |

|              |            |                                                                                                                |       |        |
|--------------|------------|----------------------------------------------------------------------------------------------------------------|-------|--------|
| 1438195_at   | Gpd1l      | glycerol-3-phosphate dehydrogenase 1-like                                                                      | 0,64  | 0,0002 |
| 1438303_at   | Tgfb2      | transforming growth factor, beta 2                                                                             | 1,74  | 0,0001 |
| 1438638_x_at | Fam116b    | family with sequence similarity 116, member B<br>calcium/calmodulin-dependent protein kinase II,<br>delta      | 0,76  | 0,0002 |
| 1439168_at   | Camk2d     |                                                                                                                | 2,03  | 0,0001 |
| 1439352_at   | Trim7      | tripartite motif-containing 7                                                                                  | 0,51  | 0,0001 |
| 1439740_s_at | Uck2       | uridine-cytidine kinase 2                                                                                      | 5,30  | 0,0000 |
| 1440351_at   | NA         | NA                                                                                                             | 1,70  | 0,0001 |
| 1440563_at   | NA         | NA                                                                                                             | 1,79  | 0,0001 |
| 1440729_at   | Eps15      | epidermal growth factor receptor pathway substrate<br>15                                                       | 2,01  | 0,0002 |
| 1440771_at   | Zkscan1    | zinc finger with KRAB and SCAN domains 1                                                                       | 1,64  | 0,0001 |
| 1440878_at   | Runx1      | runt related transcription factor 1                                                                            | 1,66  | 0,0002 |
| 1441063_at   | Eif2c3     | eukaryotic translation initiation factor 2C, 3                                                                 | 1,62  | 0,0002 |
| 1441137_at   | Bicc1      | bicaudal C homolog 1 (Drosophila)                                                                              | 1,61  | 0,0001 |
| 1441792_at   | Rik        | RIKEN cDNA A630033E08 gene                                                                                     | 1,25  | 0,0001 |
| 1441826_x_at | NA         | NA                                                                                                             | 0,77  | 0,0002 |
| 1442251_at   | Vcpip1     | valosin containing protein (p97)/p47 complex<br>interacting protein 1                                          | 1,66  | 0,0001 |
| 1442849_at   | Lrp1       | low density lipoprotein receptor-related protein 1<br>calcium/calmodulin-dependent protein kinase II,<br>delta | 1,38  | 0,0001 |
| 1444031_at   | Camk2d     |                                                                                                                | 2,98  | 0,0001 |
| 1444058_at   | Dzip3      | DAZ interacting protein 3, zinc finger                                                                         | 3,45  | 0,0001 |
| 1444361_at   | Ap1s2      | adaptor-related protein complex 1, sigma 2 subunit                                                             | 1,47  | 0,0001 |
| 1444537_at   | AI429363   | expressed sequence AI429363                                                                                    | 1,67  | 0,0002 |
| 1445576_at   | Rsph10b2   | radial spoke head 10 homolog B (Chlamydomonas)                                                                 | 0,84  | 0,0002 |
| 1446324_at   | NA         | NA                                                                                                             | 1,52  | 0,0001 |
| 1447812_x_at | Flnc       | filamin C, gamma                                                                                               | 2,40  | 0,0000 |
| 1447819_x_at | Col8a1     | collagen, type VIII, alpha 1                                                                                   | 5,81  | 0,0001 |
| 1447870_x_at | 1110002E22 |                                                                                                                |       |        |
| 1448065_at   | Rik        | RIKEN cDNA 1110002E22 gene                                                                                     | 1,83  | 0,0001 |
| 1448130_at   | NA         | NA                                                                                                             | 0,73  | 0,0002 |
| 1448467_a_at | Fdft1      | farnesyl diphosphate farnesyl transferase 1                                                                    | 0,45  | 0,0001 |
| 1448604_at   | Ehbp11l    | EH domain binding protein 1-like 1                                                                             | 1,25  | 0,0002 |
| 1448617_at   | Uck2       | uridine-cytidine kinase 2                                                                                      | 4,37  | 0,0001 |
| 1449073_at   | Cd53       | CD53 antigen                                                                                                   | 2,10  | 0,0001 |
| 1449154_at   | Flnc       | filamin C, gamma                                                                                               | 2,46  | 0,0000 |
| 1449175_at   | Col11a1    | collagen, type XI, alpha 1                                                                                     | 2,38  | 0,0000 |
| 1449254_at   | Gpr65      | G-protein coupled receptor 65                                                                                  | 2,05  | 0,0002 |
| 1450311_at   | Spp1       | secreted phosphoprotein 1                                                                                      | 53,75 | 0,0000 |
| 1450922_a_at | Slc8a3     | solute carrier family 8 (sodium/calcium exchanger),<br>member 3                                                | 0,78  | 0,0002 |
| 1450923_at   | Tgfb2      | transforming growth factor, beta 2                                                                             | 4,21  | 0,0000 |
| 1450984_at   | Tgfb2      | transforming growth factor, beta 2                                                                             | 3,24  | 0,0000 |
| 1451175_at   | Tjp2       | tight junction protein 2                                                                                       | 1,64  | 0,0002 |
| 1451227_a_at | Spcs3      | signal peptidase complex subunit 3 homolog (S.<br>cerevisiae)                                                  | 1,72  | 0,0002 |
| 1451716_at   | Slc10a3    | solute carrier family 10 (sodium/bile acid<br>cotransporter family), member 3                                  | 1,63  | 0,0002 |
|              | Mafb       | v-maf musculoaponeurotic fibrosarcoma oncogene                                                                 | 1,75  | 0,0001 |

|              |              |                                                                                                          |      |        |
|--------------|--------------|----------------------------------------------------------------------------------------------------------|------|--------|
|              |              | family, protein B (avian)                                                                                |      |        |
| 1451939_at   | Srpx         | sushi-repeat-containing protein                                                                          | 2,63 | 0,0001 |
| 1452086_at   | Trmt5        | TRM5 tRNA methyltransferase 5 homolog (S. cerevisiae)                                                    | 0,41 | 0,0001 |
| 1452286_at   | Slain2       | SLAIN motif family, member 2                                                                             | 1,31 | 0,0001 |
| 1452417_x_at | LOC100047628 | similar to Chain L, Structural Basis Of Antigen Mimicry In A Clinically Relevant Melanoma Antigen System | 2,34 | 0,0002 |
| 1452968_at   | Cthrc1       | collagen triple helix repeat containing 1                                                                | 4,61 | 0,0001 |
| 1453355_at   | Wnk2         | WNK lysine deficient protein kinase 2                                                                    | 0,47 | 0,0001 |
| 1454995_at   | Ddah1        | dimethylarginine dimethylaminohydrolase 1                                                                | 2,26 | 0,0002 |
| 1455280_at   | Frem1        | Fras1 related extracellular matrix protein 1                                                             | 2,03 | 0,0001 |
| 1455374_at   | Kcnj3        | potassium inwardly-rectifying channel, subfamily J, member 3                                             | 0,38 | 0,0001 |
| 1455660_at   | Csf2rb       | colony stimulating factor 2 receptor, beta, low-affinity (granulocyte-macrophage)                        | 2,15 | 0,0001 |
| 1455833_at   | Afap1l2      | actin filament associated protein 1-like 2                                                               | 1,34 | 0,0002 |
| 1456357_at   | k            | RIKEN cDNA A930041I02 gene                                                                               | 1,58 | 0,0001 |
| 1456611_at   | Fam13a       | family with sequence similarity 13, member A                                                             | 1,40 | 0,0002 |
| 1456777_at   | Mgam         | maltase-glucoamylase                                                                                     | 2,31 | 0,0001 |
| 1456887_at   | Cmklr1       | chemokine-like receptor 1                                                                                | 1,36 | 0,0002 |
| 1457022_at   | NA           | NA                                                                                                       | 1,56 | 0,0001 |
| 1457271_at   | Gm131        | gene model 131, (NCBI)                                                                                   | 0,77 | 0,0001 |
| 1457296_at   | Cilp         | cartilage intermediate layer protein, nucleotide pyrophosphohydrolase                                    | 7,11 | 0,0002 |
| 1457980_x_at | Uck2         | uridine-cytidine kinase 2                                                                                | 2,37 | 0,0001 |
| 1459090_at   | NA           | NA                                                                                                       | 0,73 | 0,0002 |
| 1459350_at   | NA           | NA                                                                                                       | 1,71 | 0,0001 |
| 1459457_at   | Camk2d       | calcium/calmodulin-dependent protein kinase II, delta                                                    | 2,08 | 0,0001 |
| 1459546_s_at | Enpp1        | ectonucleotide pyrophosphatase/phosphodiesterase 1                                                       | 2,86 | 0,0001 |
| 1459637_at   | NA           | NA                                                                                                       | 0,74 | 0,0001 |
| 1460133_at   | NA           | NA                                                                                                       | 1,44 | 0,0001 |
| 1460218_at   | Cd52         | CD52 antigen                                                                                             | 2,70 | 0,0001 |

## Differential regulated between Shunt vs. TAC and between Shunt and Sham but not TAC and Sham

| Affymetrix probe set identification | Gene symbol          | Gene name                                                                                             | Fold change Shunt | Adjusted P value TAC vs Shunt |
|-------------------------------------|----------------------|-------------------------------------------------------------------------------------------------------|-------------------|-------------------------------|
| 1415999_at<br>1420715_at            | Hey1<br>Pparg        | hairy/enhancer-of-split related with YRPW motif 1<br>peroxisome proliferator activated receptor gamma | 1,84<br>1,42      | 0,0002<br>0,0001              |
| 1426759_at                          | Map4k3<br>2810025M15 | kinase 3                                                                                              | 1,24              | 0,0001                        |
| 1428452_at<br>1428554_at            | Rik<br>1810035L17R   | RIKEN cDNA 2810025M15 gene                                                                            | 1,25              | 0,0002                        |
| 1428976_at                          | ik                   | RIKEN cDNA 1810035L17 gene                                                                            | 1,29              | 0,0001                        |
| 1429315_at                          | Tmpo                 | thymopoietin                                                                                          | 1,55              | 0,0001                        |
| 1431126_at                          | Syt11<br>0610011F06R | synaptotagmin XI                                                                                      | 0,77              | 0,0002                        |
| 1433992_at                          | ik                   | RIKEN cDNA 0610011F06 gene                                                                            | 0,59              | 0,0001                        |
| 1434684_at<br>1435737_at            | Shroom2<br>Rin3      | shroom family member 2<br>Ras and Rab interactor 3                                                    | 2,51<br>1,47      | 0,0001<br>0,0001              |
| 1439015_at                          | Nde1                 | nuclear distribution gene E homolog 1 (A nidulans)                                                    | 1,34              | 0,0002                        |
| 1435905_at                          | D3Erttd300e          | DNA segment, Chr 3, ERATO Doi 300, expressed glial cell line derived neurotrophic factor family       | 0,73              | 0,0001                        |
| 1439511_at                          | Gfra1                | receptor alpha 1                                                                                      | 0,51              | 0,0001                        |
| 1441577_at                          | Cdk7<br>C530014P21   | cyclin-dependent kinase 7 (homolog of Xenopus MO15 cdk-activating kinase)                             | 0,58              | 0,0002                        |
| 1446528_at                          | Rik                  | RIKEN cDNA C530014P21 gene                                                                            | 0,60              | 0,0000                        |
| 1451257_at                          | Scyl2                | SCY1-like 2 (S. cerevisiae)                                                                           | 0,74              | 0,0002                        |
| 1453646_at                          | Acsl6<br>3110005L21R | acyl-CoA synthetase long-chain family member 6                                                        | 1,45              | 0,0002                        |
| 1455459_at<br>1455817_x_at          | ik<br>Prdm15         | RIKEN cDNA 3110005L21 gene                                                                            | 0,63<br>0,58      | 0,0002<br>0,0002              |
| 1457338_at                          | Zxdb                 | PR domain containing 15                                                                               | 0,74              | 0,0002                        |
| 1459048_s_at                        | NA                   | zinc finger, X-linked, duplicated B                                                                   | 0,53              | 0,0001                        |
|                                     | Zfp142               | NA                                                                                                    | 0,67              | 0,0001                        |
|                                     |                      | zinc finger protein 142                                                                               |                   |                               |

**Table IV****Pathways activated in TAC**

| <b>ID</b> | <b>Name</b>                                     | <b>P value</b> |
|-----------|-------------------------------------------------|----------------|
| X00040    | Pentose and glucuronate interconversions        | 0,014          |
| X00361    | gamma-Hexachlorocyclohexane degradation         | 0,014          |
| X00512    | O-Glycan biosynthesis                           | 0,014          |
| X00531    | Glycosaminoglycan degradation                   | 0,014          |
| X00532    | Chondroitin sulfate biosynthesis                | 0,014          |
| X00603    | Glycosphingolipid biosynthesis - globo series   | 0,014          |
| X00604    | Glycosphingolipid biosynthesis - ganglio series | 0,014          |
| X00983    | Drug metabolism - other enzymes                 | 0,014          |
| X01032    | Glycan structures - degradation                 | 0,014          |
| X03010    | Ribosome                                        | 0,014          |
| X03030    | DNA replication                                 | 0,014          |
| X03410    | Base excision repair                            | 0,014          |
| X03420    | Nucleotide excision repair                      | 0,014          |
| X03430    | Mismatch repair                                 | 0,014          |
| X04110    | Cell cycle                                      | 0,014          |
| X04115    | p53 signaling pathway                           | 0,014          |
| X04210    | Apoptosis                                       | 0,014          |
| X04510    | Focal adhesion                                  | 0,014          |
| X04512    | ECM-receptor interaction                        | 0,014          |
| X04514    | Cell adhesion molecules (CAMs)                  | 0,014          |
| X04520    | Adherens junction                               | 0,014          |
| X04530    | Tight junction                                  | 0,014          |
| X04620    | Toll-like receptor signaling pathway            | 0,014          |
| X04650    | Natural killer cell mediated cytotoxicity       | 0,014          |
| X04660    | T cell receptor signaling pathway               | 0,014          |
| X04662    | B cell receptor signaling pathway               | 0,014          |
| X04670    | Leukocyte transendothelial migration            | 0,014          |
| X04810    | Regulation of actin cytoskeleton                | 0,014          |
| X05014    | Amyotrophic lateral sclerosis (ALS)             | 0,014          |
| X05040    | Huntington's disease                            | 0,014          |
| X05050    | Dentatorubropallidoluysian atrophy (DRPLA)      | 0,014          |
| X05060    | Prion disease                                   | 0,014          |
| X05210    | Colorectal cancer                               | 0,014          |
| X05214    | Glioma                                          | 0,014          |
| X05215    | Prostate cancer                                 | 0,014          |
| X05218    | Melanoma                                        | 0,014          |
| X05222    | Small cell lung cancer                          | 0,014          |
| X05322    | Systemic lupus erythematosus                    | 0,014          |
| X04940    | Type I diabetes mellitus                        | 0,024          |
| X05332    | Graft-versus-host disease                       | 0,024          |

## Pathways repressed in TAC

| ID     | Name                                                  | P value |
|--------|-------------------------------------------------------|---------|
| X00010 | Glycolysis / Gluconeogenesis                          | 0,014   |
| X00020 | Citrate cycle (TCA cycle)                             | 0,014   |
| X00030 | Pentose phosphate pathway                             | 0,014   |
| X00051 | Fructose and mannose metabolism                       | 0,014   |
| X00071 | Fatty acid metabolism                                 | 0,014   |
| X00120 | Bile acid biosynthesis                                | 0,014   |
| X00190 | Oxidative phosphorylation                             | 0,014   |
| X00220 | Urea cycle and metabolism of amino groups             | 0,014   |
| X00230 | Purine metabolism                                     | 0,014   |
| X00251 | Glutamate metabolism                                  | 0,014   |
| X00252 | Alanine and aspartate metabolism                      | 0,014   |
| X00260 | Glycine, serine and threonine metabolism              | 0,014   |
| X00271 | Methionine metabolism                                 | 0,014   |
| X00272 | Cysteine metabolism                                   | 0,014   |
| X00280 | Valine, leucine and isoleucine degradation            | 0,014   |
| X00290 | Valine, leucine and isoleucine biosynthesis           | 0,014   |
| X00310 | Lysine degradation                                    | 0,014   |
| X00340 | Histidine metabolism                                  | 0,014   |
| X00350 | Tyrosine metabolism                                   | 0,014   |
| X00360 | Phenylalanine metabolism                              | 0,014   |
| X00380 | Tryptophan metabolism                                 | 0,014   |
| X00410 | beta-Alanine metabolism                               | 0,014   |
| X00450 | Selenoamino acid metabolism                           | 0,014   |
| X00480 | Glutathione metabolism                                | 0,014   |
| X00561 | Glycerolipid metabolism                               | 0,014   |
| X00563 | Glycosylphosphatidylinositol(GPI)-anchor biosynthesis | 0,014   |
| X00564 | Glycerophospholipid metabolism                        | 0,014   |
| X00565 | Ether lipid metabolism                                | 0,014   |
| X00592 | alpha-Linolenic acid metabolism                       | 0,014   |
| X00620 | Pyruvate metabolism                                   | 0,014   |
| X00630 | Glyoxylate and dicarboxylate metabolism               | 0,014   |
| X00632 | Benzoate degradation via CoA ligation                 | 0,014   |
| X00640 | Propanoate metabolism                                 | 0,014   |
| X00650 | Butanoate metabolism                                  | 0,014   |
| X00790 | Folate biosynthesis                                   | 0,014   |
| X00860 | Porphyrin and chlorophyll metabolism                  | 0,014   |
| X00903 | Limonene and pinene degradation                       | 0,014   |
| X00910 | Nitrogen metabolism                                   | 0,014   |
| X00960 | Alkaloid biosynthesis II                              | 0,014   |
| X00970 | Aminoacyl-tRNA biosynthesis                           | 0,014   |
| X00980 | Metabolism of xenobiotics by cytochrome P450          | 0,014   |
| X00982 | Drug metabolism - cytochrome P450                     | 0,014   |
| X01031 | Glycan structures - biosynthesis 2                    | 0,014   |
| X01040 | Biosynthesis of unsaturated fatty acids               | 0,014   |
| X02010 | ABC transporters - General                            | 0,014   |
| X03020 | RNA polymerase                                        | 0,014   |
| X03060 | Protein export                                        | 0,014   |
| X03320 | PPAR signaling pathway                                | 0,014   |
| X04020 | Calcium signaling pathway                             | 0,014   |
| X04120 | Ubiquitin mediated proteolysis                        | 0,014   |
| X04140 | Regulation of autophagy                               | 0,014   |

|        |                                 |       |
|--------|---------------------------------|-------|
| X04340 | Hedgehog signaling pathway      | 0,014 |
| X04614 | Renin-angiotensin system        | 0,014 |
| X04664 | Fc epsilon RI signaling pathway | 0,014 |
| X04910 | Insulin signaling pathway       | 0,014 |
| X04920 | Adipocytokine signaling pathway | 0,014 |
| X04930 | Type II diabetes mellitus       | 0,014 |
| X05010 | Alzheimer's disease             | 0,014 |
| X05012 | Parkinson's disease             | 0,014 |
| X00533 | Keratan sulfate biosynthesis    | 0,022 |

---



## Table V

### Pathways activated in Shunt

| <b>ID</b> | <b>Name</b>                                | <b>P value</b> |
|-----------|--------------------------------------------|----------------|
| X00040    | Pentose and glucuronate interconversions   | 0,014          |
| X04310    | Wnt signaling pathway                      | 0,014          |
| X04520    | Adherens junction                          | 0,014          |
| X04810    | Regulation of actin cytoskeleton           | 0,014          |
| X04916    | Melanogenesis                              | 0,014          |
| X05040    | Huntington's disease                       | 0,014          |
| X05050    | Dentatorubropallidoluysian atrophy (DRPLA) | 0,014          |

Not present in the TAC model

### Pathways repressed in Shunt

| <b>ID</b> | <b>Name</b>                                 | <b>P value</b> |
|-----------|---------------------------------------------|----------------|
| X00252    | Alanine and aspartate metabolism            | 0,014          |
| X00280    | Valine, leucine and isoleucine degradation  | 0,014          |
| X00290    | Valine, leucine and isoleucine biosynthesis | 0,014          |
| X00450    | Selenoamino acid metabolism                 | 0,014          |
| X04140    | Regulation of autophagy                     | 0,014          |
| X04612    | Antigen processing and presentation         | 0,014          |
| X05340    | Primary immunodeficiency                    | 0,024          |

Not present in the TAC model
